# Supplementary material for: Selective clearance of the inner nuclear membrane protein emerin by vesicular transport during ER stress
Source: eLife journal article supplement (doi:10.7554/elife.49796), 2019-10-10
Supplement: supp [file elife-49796-supp-v1.zip]

Archive with 16 entries (16 files):
- elife_poa_e49796_Figure_8_figure_supplement_2.ai
- elife_poa_e49796_Source_data_1.xlsx
- elife_poa_e49796_Figure_3_figure_supplement_1.ai
- elife_poa_e49796_Figure_3_figure_supplement_3.ai
- elife_poa_e49796_Figure_6_figure_supplement_1.ai
- elife_poa_e49796_Figure_8_figure_supplement_1.ai
- elife_poa_e49796_Supplementary_file_3.xlsx
- elife_poa_e49796_Supplementary_file_1.xlsx
- elife_poa_e49796_Figure_2_figure_supplement_1.ai
- elife_poa_e49796_Supplementary_file_2.xlsx
- elife_poa_e49796_Figure_3_figure_supplement_2.ai
- elife_poa_e49796_Transparent_Reporting_File.pdf
- elife_poa_e49796_Source_data_2.xlsx
- elife_poa_e49796_Figure_1_figure_supplement_1.ai
- elife_poa_e49796_Figure_4_figure_supplement_1.ai
- elife_poa_e49796_Figure_7_figure_supplement_1.ai
