# Supplementary material for: Selective clearance of the inner nuclear membrane protein emerin by vesicular transport during ER stress
Source: eLife journal article supplement (doi:10.7554/elife.49796), 2019-10-10
Supplement: supp [file elife-49796-supp-v1.zip › elife_poa_e49796_Source_data_1.xlsx]

## Sheet: Table S1 filtered peptide data 
UniprotID	Description	SEQUENCE	Area Ratio	% Heavy	Time (days)
P99027	60S acidic ribosomal protein P2 OS=Mus musculus GN=Rplp2 PE=1 SV=3	R.YVASYLLAALGGNSSPSAK.D	0.01095	98.9169	0
P99027	60S acidic ribosomal protein P2 OS=Mus musculus GN=Rplp2 PE=1 SV=3	R.YVASYLLAALGGNSSPSAK.D	0.01217	98.7976	0
P99027	60S acidic ribosomal protein P2 OS=Mus musculus GN=Rplp2 PE=1 SV=3	K.ILDSVGIEADDDRLNK.V	0.00047	99.953	0
P99027	60S acidic ribosomal protein P2 OS=Mus musculus GN=Rplp2 PE=1 SV=3	K.ILDSVGIEADDDRLNK.V	0.01627	98.399	0
P99027	60S acidic ribosomal protein P2 OS=Mus musculus GN=Rplp2 PE=1 SV=3	K.LASVPAGGAVAVSAAPGSAAPAAGSAPAAAEEK.K	0.03058	97.0327	0
P99027	60S acidic ribosomal protein P2 OS=Mus musculus GN=Rplp2 PE=1 SV=3	K.LASVPAGGAVAVSAAPGSAAPAAGSAPAAAEEK.K	0.01148	98.865	0
P99027	60S acidic ribosomal protein P2 OS=Mus musculus GN=Rplp2 PE=1 SV=3	K.LASVPAGGAVAVSAAPGSAAPAAGSAPAAAEEK.K	0.02414	97.6429	0
P99027	60S acidic ribosomal protein P2 OS=Mus musculus GN=Rplp2 PE=1 SV=3	K.LASVPAGGAVAVSAAPGSAAPAAGSAPAAAEEKKDEK.K	0.00629	99.3749	0
Q91XV3	Brain acid soluble protein 1 OS=Mus musculus GN=Basp1 PE=1 SV=3	K.ESEPQAAADATEVK.E	0.01686	98.342	0
Q91XV3	Brain acid soluble protein 1 OS=Mus musculus GN=Basp1 PE=1 SV=3	K.AEPEKSEGAAEEQPEPAPAPEQEAAAPGPAAGGEAPK.A	0.00843	99.164	0
Q91XV3	Brain acid soluble protein 1 OS=Mus musculus GN=Basp1 PE=1 SV=3	K.AEPEKSEGAAEEQPEPAPAPEQEAAAPGPAAGGEAPK.A	25.5624	3.76472	0
Q91XV3	Brain acid soluble protein 1 OS=Mus musculus GN=Basp1 PE=1 SV=3	K.SEGAAEEQPEPAPAPEQEAAAPGPAAGGEAPK.A	0.00815	99.1916	0
Q91XV3	Brain acid soluble protein 1 OS=Mus musculus GN=Basp1 PE=1 SV=3	K.AGEASAESTGAADGAAPEEGEAK.K	0.01051	98.9599	0
Q91XV3	Brain acid soluble protein 1 OS=Mus musculus GN=Basp1 PE=1 SV=3	K.AGEASAESTGAADGAAPEEGEAK.K	0.00878	99.1296	0
Q91XV3	Brain acid soluble protein 1 OS=Mus musculus GN=Basp1 PE=1 SV=3	K.APAPAAPAAAEPQAEAPAAAASSEQSVAVK.E	0.00218	99.7825	0
Q91XV3	Brain acid soluble protein 1 OS=Mus musculus GN=Basp1 PE=1 SV=3	K.APAPAAPAAAEPQAEAPAAAASSEQSVAVK.E	0.00671	99.3335	0
Q91XV3	Brain acid soluble protein 1 OS=Mus musculus GN=Basp1 PE=1 SV=3	K.APAPAAPAAAEPQAEAPAAAASSEQSVAVKE.-	0.00195	99.8054	0
Q91XV3	Brain acid soluble protein 1 OS=Mus musculus GN=Basp1 PE=1 SV=3	K.APAPAAPAAAEPQAEAPAAAASSEQSVAVKE.-	0.00688	99.3167	0
Q9DCX2	ATP synthase subunit d, mitochondrial OS=Mus musculus GN=Atp5h PE=1 SV=3	K.TIDWVSFVEVMPQNQK.A	0.03192	96.9067	0
Q9DCX2	ATP synthase subunit d, mitochondrial OS=Mus musculus GN=Atp5h PE=1 SV=3	K.TIDWVSFVEVMPQNQK.A	0.02066	97.9758	0
Q9DCX2	ATP synthase subunit d, mitochondrial OS=Mus musculus GN=Atp5h PE=1 SV=3	R.LASLSEKPPAIDWAYYR.A	0.00612	99.3917	0
Q9DCX2	ATP synthase subunit d, mitochondrial OS=Mus musculus GN=Atp5h PE=1 SV=3	R.LASLSEKPPAIDWAYYR.A	0.00249	99.7516	0
Q9DCX2	ATP synthase subunit d, mitochondrial OS=Mus musculus GN=Atp5h PE=1 SV=3	L.ASLSEKPPAIDWAYYR.A	0.00706	99.2989	0
Q9DCX2	ATP synthase subunit d, mitochondrial OS=Mus musculus GN=Atp5h PE=1 SV=3	L.SEKPPAIDWAYYR.A	0.00082	99.9181	0
Q9DCX2	ATP synthase subunit d, mitochondrial OS=Mus musculus GN=Atp5h PE=1 SV=3	R.ANVAKPGLVDDFEK.K	0.00545	99.458	0
Q9DCX2	ATP synthase subunit d, mitochondrial OS=Mus musculus GN=Atp5h PE=1 SV=3	R.ANVAKPGLVDDFEKK.Y	0.02043	97.9979	0
Q9DCX2	ATP synthase subunit d, mitochondrial OS=Mus musculus GN=Atp5h PE=1 SV=3	K.IPVPEDKYTALVDQEEKEDVK.S	0.00622	99.3818	0
Q9DCX2	ATP synthase subunit d, mitochondrial OS=Mus musculus GN=Atp5h PE=1 SV=3	K.IPVPEDKYTALVDQEEKEDVK.S	0.03378	96.7324	0
Q9DCX2	ATP synthase subunit d, mitochondrial OS=Mus musculus GN=Atp5h PE=1 SV=3	D.QMTIDDLNEIFPETK.L	0.01163	98.8504	0
Q9DCX2	ATP synthase subunit d, mitochondrial OS=Mus musculus GN=Atp5h PE=1 SV=3	M.TIDDLNEIFPETK.L	0.01479	98.5426	0
Q9DCX2	ATP synthase subunit d, mitochondrial OS=Mus musculus GN=Atp5h PE=1 SV=3	K.KYPYWPHQPIENL.-	0.02996	97.0911	0
P14602	Heat shock protein beta-1 OS=Mus musculus GN=Hspb1 PE=1 SV=3	R.RVPFSLLR.S	0.01055	98.956	0
P14602	Heat shock protein beta-1 OS=Mus musculus GN=Hspb1 PE=1 SV=3	R.VPFSLLR.S	0.02216	97.832	0
P14602	Heat shock protein beta-1 OS=Mus musculus GN=Hspb1 PE=1 SV=3	R.SPSWEPFRDWYPAHSR.L	0.06039	94.3049	0
P14602	Heat shock protein beta-1 OS=Mus musculus GN=Hspb1 PE=1 SV=3	R.SPSWEPFRDWYPAHSR.L	0.00212	99.7884	0
P14602	Heat shock protein beta-1 OS=Mus musculus GN=Hspb1 PE=1 SV=3	R.DWYPAHSR.L	0.00547	99.456	0
P14602	Heat shock protein beta-1 OS=Mus musculus GN=Hspb1 PE=1 SV=3	R.LFDQAFGVPR.L	0.01308	98.7089	0
P14602	Heat shock protein beta-1 OS=Mus musculus GN=Hspb1 PE=1 SV=3	R.LPDEWSQWFSAAGWPGYVRPLPA.A	0.00156	99.8442	0
P14602	Heat shock protein beta-1 OS=Mus musculus GN=Hspb1 PE=1 SV=3	R.LPDEWSQWFSAAGWPGYVRPLPA.A	0.0048	99.5223	0
P14602	Heat shock protein beta-1 OS=Mus musculus GN=Hspb1 PE=1 SV=3	R.LPDEWSQWFSAAGWPGYVRPLPAAT.A	0.02859	97.2205	0
P14602	Heat shock protein beta-1 OS=Mus musculus GN=Hspb1 PE=1 SV=3	R.LPDEWSQWFSAAGWPGYVRPLPAATAEGPAAVTL.A	0.00334	99.6671	0
P14602	Heat shock protein beta-1 OS=Mus musculus GN=Hspb1 PE=1 SV=3	R.LPDEWSQWFSAAGWPGYVRPLPAATAEGPAAVTLAAPAFSR.A	0.01116	98.8963	0
P14602	Heat shock protein beta-1 OS=Mus musculus GN=Hspb1 PE=1 SV=3	R.LPDEWSQWFSAAGWPGYVRPLPAATAEGPAAVTLAAPAFSR.A	0.00399	99.6026	0
P14602	Heat shock protein beta-1 OS=Mus musculus GN=Hspb1 PE=1 SV=3	R.LPDEWSQWFSAAGWPGYVRPLPAATAEGPAAVTLAAPAFSR.A	0.09882	91.0067	0
P14602	Heat shock protein beta-1 OS=Mus musculus GN=Hspb1 PE=1 SV=3	R.QLSSGVSEIR.Q	0.02387	97.6686	0
P14602	Heat shock protein beta-1 OS=Mus musculus GN=Hspb1 PE=1 SV=3	R.VSLDVNHFAPEELTVK.T	0.03515	96.6044	0
P14602	Heat shock protein beta-1 OS=Mus musculus GN=Hspb1 PE=1 SV=3	R.VSLDVNHFAPEELTVK.T	0.02018	98.0219	0
P14602	Heat shock protein beta-1 OS=Mus musculus GN=Hspb1 PE=1 SV=3	R.KYTLPPGVDPTLVSSSLSPEGTLTVEAPLPK.A	0.00148	99.8522	0
P14602	Heat shock protein beta-1 OS=Mus musculus GN=Hspb1 PE=1 SV=3	K.YTLPPGVDPTLVSSSLSPEGTLTVEAPLPK.A	0.05887	94.4403	0
P62737	Actin, aortic smooth muscle OS=Mus musculus GN=Acta2 PE=1 SV=1	R.AVFPSIVGR.P	0.00909	99.0992	0
P62737	Actin, aortic smooth muscle OS=Mus musculus GN=Acta2 PE=1 SV=1	R.HQGVMVGMGQK.D	0.01829	98.2039	0
P62737	Actin, aortic smooth muscle OS=Mus musculus GN=Acta2 PE=1 SV=1	K.DSYVGDEAQSK.R	0.01242	98.7732	0
P62737	Actin, aortic smooth muscle OS=Mus musculus GN=Acta2 PE=1 SV=1	K.RGILTLK.Y	0.00127	99.8732	0
P62737	Actin, aortic smooth muscle OS=Mus musculus GN=Acta2 PE=1 SV=1	H.GIITNWDDMEK.I	0.06172	94.1868	0
P62737	Actin, aortic smooth muscle OS=Mus musculus GN=Acta2 PE=1 SV=1	K.IWHHSFYNELR.V	0.01911	98.1248	0
P62737	Actin, aortic smooth muscle OS=Mus musculus GN=Acta2 PE=1 SV=1	R.VAPEEHPTLLTEAPLNPK.A	0.00746	99.2595	0
P62737	Actin, aortic smooth muscle OS=Mus musculus GN=Acta2 PE=1 SV=1	R.VAPEEHPTLLTEAPLNPK.A	0.02797	97.2791	0
P62737	Actin, aortic smooth muscle OS=Mus musculus GN=Acta2 PE=1 SV=1	A.VLSLYASGR.T	0.06181	94.1788	0
P62737	Actin, aortic smooth muscle OS=Mus musculus GN=Acta2 PE=1 SV=1	R.TTGIVLDSGDGVTHNVPIYEGYALPHAIMR.L	0.02076	97.9662	0
P62737	Actin, aortic smooth muscle OS=Mus musculus GN=Acta2 PE=1 SV=1	R.TTGIVLDSGDGVTHNVPIYEGYALPHAIMR.L	0.02078	97.9643	0
P62737	Actin, aortic smooth muscle OS=Mus musculus GN=Acta2 PE=1 SV=1	L.DSGDGVTHNVPIYEGYALPHAIMR.L	0.04556	95.6425	0
P62737	Actin, aortic smooth muscle OS=Mus musculus GN=Acta2 PE=1 SV=1	L.DSGDGVTHNVPIYEGYALPHAIMR.L	0.01364	98.6544	0
P62737	Actin, aortic smooth muscle OS=Mus musculus GN=Acta2 PE=1 SV=1	R.LDLAGRDLTDYLMK.I	0.00893	99.1149	0
P62737	Actin, aortic smooth muscle OS=Mus musculus GN=Acta2 PE=1 SV=1	R.LDLAGRDLTDYLMK.I	0.01235	98.7801	0
P62737	Actin, aortic smooth muscle OS=Mus musculus GN=Acta2 PE=1 SV=1	R.DLTDYLMK.I	0.03287	96.8176	0
P62737	Actin, aortic smooth muscle OS=Mus musculus GN=Acta2 PE=1 SV=1	R.GYSFVTTAER.E	0.00961	99.0481	0
P62737	Actin, aortic smooth muscle OS=Mus musculus GN=Acta2 PE=1 SV=1	K.SYELPDGQVITIGNER.F	0.03045	97.045	0
P62737	Actin, aortic smooth muscle OS=Mus musculus GN=Acta2 PE=1 SV=1	K.SYELPDGQVITIGNERF.R	0.10394	90.5846	0
P62737	Actin, aortic smooth muscle OS=Mus musculus GN=Acta2 PE=1 SV=1	Y.ELPDGQVITIGNER.F	0.03351	96.7577	0
P62737	Actin, aortic smooth muscle OS=Mus musculus GN=Acta2 PE=1 SV=1	D.GQVITIGNER.F	0.02055	97.9864	0
P62737	Actin, aortic smooth muscle OS=Mus musculus GN=Acta2 PE=1 SV=1	I.GMESAGIHETTYNSIMK.C	0.02896	97.1855	0
P62737	Actin, aortic smooth muscle OS=Mus musculus GN=Acta2 PE=1 SV=1	R.KDLYANNVLSGGTTMYPGIADR.M	0.01574	98.4504	0
P62737	Actin, aortic smooth muscle OS=Mus musculus GN=Acta2 PE=1 SV=1	K.DLYANNVLSGGTTMYPGIADR.M	0.04114	96.0486	0
P62737	Actin, aortic smooth muscle OS=Mus musculus GN=Acta2 PE=1 SV=1	Y.ANNVLSGGTTMYPGIADR.M	0.00338	99.6631	0
P62737	Actin, aortic smooth muscle OS=Mus musculus GN=Acta2 PE=1 SV=1	K.EITALAPSTMK.I	0.01531	98.4921	0
P62737	Actin, aortic smooth muscle OS=Mus musculus GN=Acta2 PE=1 SV=1	K.IKIIAPPER.K	0.00837	99.1699	0
P62737	Actin, aortic smooth muscle OS=Mus musculus GN=Acta2 PE=1 SV=1	S.KQEYDEAGPSIVHR.K	0.07697	92.8531	0
P62737	Actin, aortic smooth muscle OS=Mus musculus GN=Acta2 PE=1 SV=1	K.QEYDEAGPSIVHR.K	0.0159	98.4349	0
P62737	Actin, aortic smooth muscle OS=Mus musculus GN=Acta2 PE=1 SV=1	K.QEYDEAGPSIVHR.K	0.01365	98.6534	0
P20152	Vimentin OS=Mus musculus GN=Vim PE=1 SV=3	R.MFGGSGTSSRP.S	0.01253	98.7625	0
P20152	Vimentin OS=Mus musculus GN=Vim PE=1 SV=3	R.TYSLGSALRPSTS.R	0.01506	98.5163	0
P20152	Vimentin OS=Mus musculus GN=Vim PE=1 SV=3	R.SLYSSSPGGAYVTR.S	0.03223	96.8776	0
P20152	Vimentin OS=Mus musculus GN=Vim PE=1 SV=3	L.YSSSPGGAYVTR.S	0.02054	97.9873	0
P20152	Vimentin OS=Mus musculus GN=Vim PE=1 SV=3	R.TNEKVELQELNDR.F	0.00873	99.1346	0
P20152	Vimentin OS=Mus musculus GN=Vim PE=1 SV=3	R.TNEKVELQELNDR.F	0.01597	98.4281	0
P20152	Vimentin OS=Mus musculus GN=Vim PE=1 SV=3	K.VELQELNDR.F	0.01316	98.7011	0
P20152	Vimentin OS=Mus musculus GN=Vim PE=1 SV=3	K.VELQELNDRF.A	0.01035	98.9756	0
P20152	Vimentin OS=Mus musculus GN=Vim PE=1 SV=3	R.FANYIDK.V	0.00185	99.8153	0
P20152	Vimentin OS=Mus musculus GN=Vim PE=1 SV=3	K.ILLAELEQLKGQGK.S	0.00131	99.8692	0
P20152	Vimentin OS=Mus musculus GN=Vim PE=1 SV=3	K.SRLGDLYEEEMR.E	0.08217	92.4069	0
P20152	Vimentin OS=Mus musculus GN=Vim PE=1 SV=3	R.LGDLYEEEMR.E	0.01204	98.8103	0
P20152	Vimentin OS=Mus musculus GN=Vim PE=1 SV=3	R.QVDQLTNDK.A	0.03757	96.379	0
P20152	Vimentin OS=Mus musculus GN=Vim PE=1 SV=3	R.VEVERDNLAEDIMR.L	0.00769	99.2369	0
P20152	Vimentin OS=Mus musculus GN=Vim PE=1 SV=3	R.DNLAEDIMR.L	0.00932	99.0766	0
P20152	Vimentin OS=Mus musculus GN=Vim PE=1 SV=3	K.LQEEMLQR.E	0.01066	98.9452	0
P20152	Vimentin OS=Mus musculus GN=Vim PE=1 SV=3	K.LQEEMLQREEAESTLQSFR.Q	0.00606	99.3977	0
P20152	Vimentin OS=Mus musculus GN=Vim PE=1 SV=3	R.EEAESTLQSFR.Q	0.01101	98.911	0
P20152	Vimentin OS=Mus musculus GN=Vim PE=1 SV=3	R.EEAESTLQSFRQDVDNASLAR.L	0.01289	98.7274	0
P20152	Vimentin OS=Mus musculus GN=Vim PE=1 SV=3	R.KVESLQEEIAFLK.K	0.0125	98.7654	0
P20152	Vimentin OS=Mus musculus GN=Vim PE=1 SV=3	K.VESLQEEIAFLK.K	0.01522	98.5008	0
P20152	Vimentin OS=Mus musculus GN=Vim PE=1 SV=3	K.VESLQEEIAFLKK.L	0.00935	99.0737	0
P20152	Vimentin OS=Mus musculus GN=Vim PE=1 SV=3	K.VESLQEEIAFLKK.L	0.01161	98.8523	0
P20152	Vimentin OS=Mus musculus GN=Vim PE=1 SV=3	D.VDVSKPDLTAALR.D	0.00172	99.8283	0
P20152	Vimentin OS=Mus musculus GN=Vim PE=1 SV=3	K.NLQEAEEWYK.S	0.01142	98.8709	0
P20152	Vimentin OS=Mus musculus GN=Vim PE=1 SV=3	K.FADLSEAANR.N	0.01344	98.6738	0
P20152	Vimentin OS=Mus musculus GN=Vim PE=1 SV=3	R.EMEENFALEAANYQDTIGR.L	0.01315	98.7021	0
P20152	Vimentin OS=Mus musculus GN=Vim PE=1 SV=3	R.EMEENFALEAANYQDTIGR.L	0.02517	97.5448	0
P20152	Vimentin OS=Mus musculus GN=Vim PE=1 SV=3	R.LQDEIQNMK.E	0.01756	98.2743	0
P20152	Vimentin OS=Mus musculus GN=Vim PE=1 SV=3	R.EYQDLLNVK.M	0.0301	97.078	0
P20152	Vimentin OS=Mus musculus GN=Vim PE=1 SV=3	R.ISLPLPTFSSLNLR.E	0.0135	98.668	0
P20152	Vimentin OS=Mus musculus GN=Vim PE=1 SV=3	R.ISLPLPTFSSLNLR.E	0.01853	98.1807	0
P20152	Vimentin OS=Mus musculus GN=Vim PE=1 SV=3	I.SLPLPTFSSLNLR.E	0.03145	96.9509	0
P20152	Vimentin OS=Mus musculus GN=Vim PE=1 SV=3	R.ETNLESLPLVDTHSK.R	0.01872	98.1624	0
P20152	Vimentin OS=Mus musculus GN=Vim PE=1 SV=3	R.ETNLESLPLVDTHSK.R	0.0141	98.6096	0
P20152	Vimentin OS=Mus musculus GN=Vim PE=1 SV=3	K.TVETRDGQVINETSQHHDDLE.-	0.00324	99.677	0
P20152	Vimentin OS=Mus musculus GN=Vim PE=1 SV=3	K.TVETRDGQVINETSQHHDDLE.-	0.01559	98.4649	0
P56480	ATP synthase subunit beta, mitochondrial OS=Mus musculus GN=Atp5b PE=1 SV=2	-.MLSLVGR.V	0.00824	99.1827	0
P56480	ATP synthase subunit beta, mitochondrial OS=Mus musculus GN=Atp5b PE=1 SV=2	R.LVLEVAQHLGESTVR.T	0.01295	98.7216	0
P56480	ATP synthase subunit beta, mitochondrial OS=Mus musculus GN=Atp5b PE=1 SV=2	R.TIAMDGTEGLVR.G	0.02137	97.9077	0
P56480	ATP synthase subunit beta, mitochondrial OS=Mus musculus GN=Atp5b PE=1 SV=2	K.VLDSGAPIK.I	0.01516	98.5066	0
P56480	ATP synthase subunit beta, mitochondrial OS=Mus musculus GN=Atp5b PE=1 SV=2	K.VLDSGAPIKIPVGPETLGR.I	0.00572	99.4313	0
P56480	ATP synthase subunit beta, mitochondrial OS=Mus musculus GN=Atp5b PE=1 SV=2	K.VLDSGAPIKIPVGPETLGR.I	0.004	99.6016	0
P56480	ATP synthase subunit beta, mitochondrial OS=Mus musculus GN=Atp5b PE=1 SV=2	K.IPVGPETLGR.I	0.02244	97.8053	0
P56480	ATP synthase subunit beta, mitochondrial OS=Mus musculus GN=Atp5b PE=1 SV=2	R.IMNVIGEPIDER.G	0.01716	98.3129	0
P56480	ATP synthase subunit beta, mitochondrial OS=Mus musculus GN=Atp5b PE=1 SV=2	R.IMNVIGEPIDERGPIK.T	0.00981	99.0285	0
P56480	ATP synthase subunit beta, mitochondrial OS=Mus musculus GN=Atp5b PE=1 SV=2	K.VVDLLAPYAK.G	0.0287	97.2101	0
P56480	ATP synthase subunit beta, mitochondrial OS=Mus musculus GN=Atp5b PE=1 SV=2	K.AHGGYSVFAGVGER.T	0.00361	99.6403	0
P56480	ATP synthase subunit beta, mitochondrial OS=Mus musculus GN=Atp5b PE=1 SV=2	R.TREGNDLYHEMIESGVINLK.D	0.01071	98.9403	0
P56480	ATP synthase subunit beta, mitochondrial OS=Mus musculus GN=Atp5b PE=1 SV=2	R.EGNDLYHEMIESGVINLK.D	0.02523	97.5391	0
P56480	ATP synthase subunit beta, mitochondrial OS=Mus musculus GN=Atp5b PE=1 SV=2	K.VALVYGQMNEPPGAR.A	0.01897	98.1383	0
P56480	ATP synthase subunit beta, mitochondrial OS=Mus musculus GN=Atp5b PE=1 SV=2	R.VALTGLTVAEYFR.D	0.0299	97.0968	0
P56480	ATP synthase subunit beta, mitochondrial OS=Mus musculus GN=Atp5b PE=1 SV=2	F.RDQEGQDVLLFIDNIFR.F	0.33693	74.7982	0
P56480	ATP synthase subunit beta, mitochondrial OS=Mus musculus GN=Atp5b PE=1 SV=2	R.DQEGQDVLLFIDNIFR.F	0.02808	97.2687	0
P56480	ATP synthase subunit beta, mitochondrial OS=Mus musculus GN=Atp5b PE=1 SV=2	R.FTQAGSEVSALLGR.I	0.01192	98.822	0
P56480	ATP synthase subunit beta, mitochondrial OS=Mus musculus GN=Atp5b PE=1 SV=2	R.IPSAVGYQPTLATDMGTMQER.I	0.01383	98.6359	0
P56480	ATP synthase subunit beta, mitochondrial OS=Mus musculus GN=Atp5b PE=1 SV=2	R.IPSAVGYQPTLATDMGTMQER.I	0.01515	98.5076	0
P56480	ATP synthase subunit beta, mitochondrial OS=Mus musculus GN=Atp5b PE=1 SV=2	R.AIAELGIYPAVDPLDSTSR.I	0.01304	98.7128	0
P56480	ATP synthase subunit beta, mitochondrial OS=Mus musculus GN=Atp5b PE=1 SV=2	R.IMDPNIVGNEHYDVAR.G	0.01507	98.5154	0
P56480	ATP synthase subunit beta, mitochondrial OS=Mus musculus GN=Atp5b PE=1 SV=2	R.IMDPNIVGNEHYDVAR.G	0.01509	98.5134	0
P56480	ATP synthase subunit beta, mitochondrial OS=Mus musculus GN=Atp5b PE=1 SV=2	D.PNIVGNEHYDVAR.G	0.03323	96.7839	0
P56480	ATP synthase subunit beta, mitochondrial OS=Mus musculus GN=Atp5b PE=1 SV=2	R.FLSQPFQVAEVFTGHMGK.L	0.01619	98.4068	0
P56480	ATP synthase subunit beta, mitochondrial OS=Mus musculus GN=Atp5b PE=1 SV=2	K.ETIKGFQQILAGEYDHLPEQAFYMVGPIEEAVAK.A	0.03627	96.4999	0
P56480	ATP synthase subunit beta, mitochondrial OS=Mus musculus GN=Atp5b PE=1 SV=2	K.GFQQILAGEYDHLPEQAFYMVGPIEEAVAK.A	0.03228	96.8729	0
P68134	Actin, alpha skeletal muscle OS=Mus musculus GN=Acta1 PE=1 SV=1	R.AVFPSIVGR.P	0.00909	99.0992	0
P68134	Actin, alpha skeletal muscle OS=Mus musculus GN=Acta1 PE=1 SV=1	R.HQGVMVGMGQK.D	0.01829	98.2039	0
P68134	Actin, alpha skeletal muscle OS=Mus musculus GN=Acta1 PE=1 SV=1	K.DSYVGDEAQSK.R	0.01242	98.7732	0
P68134	Actin, alpha skeletal muscle OS=Mus musculus GN=Acta1 PE=1 SV=1	K.RGILTLK.Y	0.00127	99.8732	0
P68134	Actin, alpha skeletal muscle OS=Mus musculus GN=Acta1 PE=1 SV=1	H.GIITNWDDMEK.I	0.06172	94.1868	0
P68134	Actin, alpha skeletal muscle OS=Mus musculus GN=Acta1 PE=1 SV=1	K.IWHHTFYNELR.V	0.01305	98.7118	0
P68134	Actin, alpha skeletal muscle OS=Mus musculus GN=Acta1 PE=1 SV=1	R.VAPEEHPTLLTEAPLNPK.A	0.00746	99.2595	0
P68134	Actin, alpha skeletal muscle OS=Mus musculus GN=Acta1 PE=1 SV=1	R.VAPEEHPTLLTEAPLNPK.A	0.02797	97.2791	0
P68134	Actin, alpha skeletal muscle OS=Mus musculus GN=Acta1 PE=1 SV=1	A.VLSLYASGR.T	0.06181	94.1788	0
P68134	Actin, alpha skeletal muscle OS=Mus musculus GN=Acta1 PE=1 SV=1	R.TTGIVLDSGDGVTHNVPIYEGYALPHAIMR.L	0.02076	97.9662	0
P68134	Actin, alpha skeletal muscle OS=Mus musculus GN=Acta1 PE=1 SV=1	R.TTGIVLDSGDGVTHNVPIYEGYALPHAIMR.L	0.02078	97.9643	0
P68134	Actin, alpha skeletal muscle OS=Mus musculus GN=Acta1 PE=1 SV=1	L.DSGDGVTHNVPIYEGYALPHAIMR.L	0.04556	95.6425	0
P68134	Actin, alpha skeletal muscle OS=Mus musculus GN=Acta1 PE=1 SV=1	L.DSGDGVTHNVPIYEGYALPHAIMR.L	0.01364	98.6544	0
P68134	Actin, alpha skeletal muscle OS=Mus musculus GN=Acta1 PE=1 SV=1	R.LDLAGRDLTDYLMK.I	0.00893	99.1149	0
P68134	Actin, alpha skeletal muscle OS=Mus musculus GN=Acta1 PE=1 SV=1	R.LDLAGRDLTDYLMK.I	0.01235	98.7801	0
P68134	Actin, alpha skeletal muscle OS=Mus musculus GN=Acta1 PE=1 SV=1	R.DLTDYLMK.I	0.03287	96.8176	0
P68134	Actin, alpha skeletal muscle OS=Mus musculus GN=Acta1 PE=1 SV=1	R.GYSFVTTAER.E	0.00961	99.0481	0
P68134	Actin, alpha skeletal muscle OS=Mus musculus GN=Acta1 PE=1 SV=1	K.SYELPDGQVITIGNER.F	0.03045	97.045	0
P68134	Actin, alpha skeletal muscle OS=Mus musculus GN=Acta1 PE=1 SV=1	K.SYELPDGQVITIGNERF.R	0.10394	90.5846	0
P68134	Actin, alpha skeletal muscle OS=Mus musculus GN=Acta1 PE=1 SV=1	Y.ELPDGQVITIGNER.F	0.03351	96.7577	0
P68134	Actin, alpha skeletal muscle OS=Mus musculus GN=Acta1 PE=1 SV=1	D.GQVITIGNER.F	0.02055	97.9864	0
P68134	Actin, alpha skeletal muscle OS=Mus musculus GN=Acta1 PE=1 SV=1	I.GMESAGIHETTYNSIMK.C	0.02896	97.1855	0
P68134	Actin, alpha skeletal muscle OS=Mus musculus GN=Acta1 PE=1 SV=1	R.KDLYANNVMSGGTTMYPGIADR.M	0.0089	99.1179	0
P68134	Actin, alpha skeletal muscle OS=Mus musculus GN=Acta1 PE=1 SV=1	K.DLYANNVMSGGTTMYPGIADR.M	0.02547	97.5163	0
P68134	Actin, alpha skeletal muscle OS=Mus musculus GN=Acta1 PE=1 SV=1	K.DLYANNVMSGGTTMYPGIADR.M	0.01303	98.7138	0
P68134	Actin, alpha skeletal muscle OS=Mus musculus GN=Acta1 PE=1 SV=1	K.EITALAPSTMK.I	0.01531	98.4921	0
P68134	Actin, alpha skeletal muscle OS=Mus musculus GN=Acta1 PE=1 SV=1	K.IKIIAPPER.K	0.00837	99.1699	0
P68134	Actin, alpha skeletal muscle OS=Mus musculus GN=Acta1 PE=1 SV=1	T.KQEYDEAGPSIVHR.K	0.07697	92.8531	0
P68134	Actin, alpha skeletal muscle OS=Mus musculus GN=Acta1 PE=1 SV=1	K.QEYDEAGPSIVHR.K	0.0159	98.4349	0
P68134	Actin, alpha skeletal muscle OS=Mus musculus GN=Acta1 PE=1 SV=1	K.QEYDEAGPSIVHR.K	0.01365	98.6534	0
P67778	Prohibitin OS=Mus musculus GN=Phb PE=1 SV=1	L.AVAGGVVNSALYNVDAGHR.A	0.01887	98.1479	0
P67778	Prohibitin OS=Mus musculus GN=Phb PE=1 SV=1	L.AVAGGVVNSALYNVDAGHR.A	0.04346	95.835	0
P67778	Prohibitin OS=Mus musculus GN=Phb PE=1 SV=1	R.GVQDIVVGEGTHFLIPWVQK.P	0.01918	98.1181	0
P67778	Prohibitin OS=Mus musculus GN=Phb PE=1 SV=1	K.DLQNVNITLR.I	0.02763	97.3113	0
P67778	Prohibitin OS=Mus musculus GN=Phb PE=1 SV=1	R.ILFRPVASQLPR.I	0.00838	99.169	0
P67778	Prohibitin OS=Mus musculus GN=Phb PE=1 SV=1	R.IYTSIGEDYDER.V	0.01649	98.3778	0
P67778	Prohibitin OS=Mus musculus GN=Phb PE=1 SV=1	R.VLPSITTEILK.S	0.01832	98.201	0
P67778	Prohibitin OS=Mus musculus GN=Phb PE=1 SV=1	R.FDAGELITQR.E	0.01447	98.5736	0
P67778	Prohibitin OS=Mus musculus GN=Phb PE=1 SV=1	R.KLEAAEDIAYQLSR.S	0.06833	93.604	0
P67778	Prohibitin OS=Mus musculus GN=Phb PE=1 SV=1	K.LEAAEDIAYQLSR.S	0.01217	98.7976	0
P67778	Prohibitin OS=Mus musculus GN=Phb PE=1 SV=1	K.LEAAEDIAYQLSR.S	41.7197	2.34084	0
P67778	Prohibitin OS=Mus musculus GN=Phb PE=1 SV=1	R.SRNITYLPAGQSVLLQLPQ.-	0.00688	99.3167	0
Q9D3D9	ATP synthase subunit delta, mitochondrial OS=Mus musculus GN=Atp5d PE=1 SV=1	Y.AEAAAAPAPAAGPGQMSFTFASPTQVFFDSANVK.Q	0.01214	98.8006	0
Q9D3D9	ATP synthase subunit delta, mitochondrial OS=Mus musculus GN=Atp5d PE=1 SV=1	Y.AEAAAAPAPAAGPGQMSFTFASPTQVFFDSANVK.Q	0.01856	98.1778	0
Q9D3D9	ATP synthase subunit delta, mitochondrial OS=Mus musculus GN=Atp5d PE=1 SV=1	M.SFTFASPTQVFFDSANVK.Q	0.00993	99.0168	0
Q9D3D9	ATP synthase subunit delta, mitochondrial OS=Mus musculus GN=Atp5d PE=1 SV=1	F.TFASPTQVFFDSANVK.Q	0.0073	99.2753	0
Q9D3D9	ATP synthase subunit delta, mitochondrial OS=Mus musculus GN=Atp5d PE=1 SV=1	F.TFASPTQVFFDSANVK.Q	0.0216	97.8857	0
Q9D3D9	ATP synthase subunit delta, mitochondrial OS=Mus musculus GN=Atp5d PE=1 SV=1	R.PGLVVVHTEDGTTTK.Y	0.02844	97.2346	0
Q9D3D9	ATP synthase subunit delta, mitochondrial OS=Mus musculus GN=Atp5d PE=1 SV=1	R.IEANEALVK.A	0.01183	98.8308	0
Q9CWF2	Tubulin beta-2B chain OS=Mus musculus GN=Tubb2b PE=1 SV=1	K.FWEVISDEHGIDPTGSYHGDSDLQLER.I	0.00269	99.7317	0
Q9CWF2	Tubulin beta-2B chain OS=Mus musculus GN=Tubb2b PE=1 SV=1	K.FWEVISDEHGIDPTGSYHGDSDLQLER.I	0.02641	97.427	0
Q9CWF2	Tubulin beta-2B chain OS=Mus musculus GN=Tubb2b PE=1 SV=1	R.INVYYNEATGNK.Y	0.00924	99.0845	0
Q9CWF2	Tubulin beta-2B chain OS=Mus musculus GN=Tubb2b PE=1 SV=1	R.AILVDLEPGTMDSVR.S	0.0166	98.3671	0
Q9CWF2	Tubulin beta-2B chain OS=Mus musculus GN=Tubb2b PE=1 SV=1	R.AILVDLEPGTMDSVR.S	0.06085	94.264	0
Q9CWF2	Tubulin beta-2B chain OS=Mus musculus GN=Tubb2b PE=1 SV=1	R.SGPFGQIFRPDNFVFGQSGAGNNWA.K	0.01914	98.1219	0
Q9CWF2	Tubulin beta-2B chain OS=Mus musculus GN=Tubb2b PE=1 SV=1	R.SGPFGQIFRPDNFVFGQSGAGNNWAK.G	0.00893	99.1149	0
Q9CWF2	Tubulin beta-2B chain OS=Mus musculus GN=Tubb2b PE=1 SV=1	A.KGHYTEGAELVDSVLDVVR.K	0.00934	99.0746	0
Q9CWF2	Tubulin beta-2B chain OS=Mus musculus GN=Tubb2b PE=1 SV=1	K.GHYTEGAELVDSVLDVVR.K	0.03349	96.7595	0
Q9CWF2	Tubulin beta-2B chain OS=Mus musculus GN=Tubb2b PE=1 SV=1	R.KLAVNMVPFPR.L	0.00234	99.7665	0
Q9CWF2	Tubulin beta-2B chain OS=Mus musculus GN=Tubb2b PE=1 SV=1	K.LAVNMVPFPR.L	0.02546	97.5172	0
Q9CWF2	Tubulin beta-2B chain OS=Mus musculus GN=Tubb2b PE=1 SV=1	R.LHFFMPGFAPLTSR.G	0.02201	97.8464	0
Q9CWF2	Tubulin beta-2B chain OS=Mus musculus GN=Tubb2b PE=1 SV=1	R.ALTVPELTQQMFDSK.N	0.02462	97.5972	0
Q9CWF2	Tubulin beta-2B chain OS=Mus musculus GN=Tubb2b PE=1 SV=1	R.ALTVPELTQQMFDSK.N	0.02355	97.6992	0
Q9CWF2	Tubulin beta-2B chain OS=Mus musculus GN=Tubb2b PE=1 SV=1	R.YLTVAAIFR.G	0.01988	98.0508	0
Q9CWF2	Tubulin beta-2B chain OS=Mus musculus GN=Tubb2b PE=1 SV=1	K.EVDEQMLNVQNK.N	0.02609	97.4573	0
Q9CWF2	Tubulin beta-2B chain OS=Mus musculus GN=Tubb2b PE=1 SV=1	K.NSSYFVEWIPNNVK.T	0.02704	97.3672	0
Q9CWF2	Tubulin beta-2B chain OS=Mus musculus GN=Tubb2b PE=1 SV=1	K.NSSYFVEWIPNNVK.T	0.01088	98.9237	0
Q9CWF2	Tubulin beta-2B chain OS=Mus musculus GN=Tubb2b PE=1 SV=1	N.SSYFVEWIPNNVK.T	0.11166	89.9556	0
Q9CWF2	Tubulin beta-2B chain OS=Mus musculus GN=Tubb2b PE=1 SV=1	K.MSATFIGNSTAIQELFK.R	0.02238	97.811	0
Q9CWF2	Tubulin beta-2B chain OS=Mus musculus GN=Tubb2b PE=1 SV=1	K.MSATFIGNSTAIQELFK.R	0.01649	98.3778	0
Q9CWF2	Tubulin beta-2B chain OS=Mus musculus GN=Tubb2b PE=1 SV=1	K.MSATFIGNSTAIQELFKR.I	0.00858	99.1493	0
Q9CWF2	Tubulin beta-2B chain OS=Mus musculus GN=Tubb2b PE=1 SV=1	R.ISEQFTAMFR.R	0.0224	97.8091	0
Q7TMM9	Tubulin beta-2A chain OS=Mus musculus GN=Tubb2a PE=1 SV=1	K.FWEVISDEHGIDPTGSYHGDSDLQLER.I	0.00269	99.7317	0
Q7TMM9	Tubulin beta-2A chain OS=Mus musculus GN=Tubb2a PE=1 SV=1	K.FWEVISDEHGIDPTGSYHGDSDLQLER.I	0.02641	97.427	0
Q7TMM9	Tubulin beta-2A chain OS=Mus musculus GN=Tubb2a PE=1 SV=1	R.AILVDLEPGTMDSVR.S	0.0166	98.3671	0
Q7TMM9	Tubulin beta-2A chain OS=Mus musculus GN=Tubb2a PE=1 SV=1	R.AILVDLEPGTMDSVR.S	0.06085	94.264	0
Q7TMM9	Tubulin beta-2A chain OS=Mus musculus GN=Tubb2a PE=1 SV=1	R.SGPFGQIFRPDNFVFGQSGAGNNWA.K	0.01914	98.1219	0
Q7TMM9	Tubulin beta-2A chain OS=Mus musculus GN=Tubb2a PE=1 SV=1	R.SGPFGQIFRPDNFVFGQSGAGNNWAK.G	0.00893	99.1149	0
Q7TMM9	Tubulin beta-2A chain OS=Mus musculus GN=Tubb2a PE=1 SV=1	A.KGHYTEGAELVDSVLDVVR.K	0.00934	99.0746	0
Q7TMM9	Tubulin beta-2A chain OS=Mus musculus GN=Tubb2a PE=1 SV=1	K.GHYTEGAELVDSVLDVVR.K	0.03349	96.7595	0
Q7TMM9	Tubulin beta-2A chain OS=Mus musculus GN=Tubb2a PE=1 SV=1	R.KLAVNMVPFPR.L	0.00234	99.7665	0
Q7TMM9	Tubulin beta-2A chain OS=Mus musculus GN=Tubb2a PE=1 SV=1	K.LAVNMVPFPR.L	0.02546	97.5172	0
Q7TMM9	Tubulin beta-2A chain OS=Mus musculus GN=Tubb2a PE=1 SV=1	R.LHFFMPGFAPLTSR.G	0.02201	97.8464	0
Q7TMM9	Tubulin beta-2A chain OS=Mus musculus GN=Tubb2a PE=1 SV=1	R.ALTVPELTQQMFDSK.N	0.02462	97.5972	0
Q7TMM9	Tubulin beta-2A chain OS=Mus musculus GN=Tubb2a PE=1 SV=1	R.ALTVPELTQQMFDSK.N	0.02355	97.6992	0
Q7TMM9	Tubulin beta-2A chain OS=Mus musculus GN=Tubb2a PE=1 SV=1	R.YLTVAAIFR.G	0.01988	98.0508	0
Q7TMM9	Tubulin beta-2A chain OS=Mus musculus GN=Tubb2a PE=1 SV=1	K.EVDEQMLNVQNK.N	0.02609	97.4573	0
Q7TMM9	Tubulin beta-2A chain OS=Mus musculus GN=Tubb2a PE=1 SV=1	K.NSSYFVEWIPNNVK.T	0.02704	97.3672	0
Q7TMM9	Tubulin beta-2A chain OS=Mus musculus GN=Tubb2a PE=1 SV=1	K.NSSYFVEWIPNNVK.T	0.01088	98.9237	0
Q7TMM9	Tubulin beta-2A chain OS=Mus musculus GN=Tubb2a PE=1 SV=1	N.SSYFVEWIPNNVK.T	0.11166	89.9556	0
Q7TMM9	Tubulin beta-2A chain OS=Mus musculus GN=Tubb2a PE=1 SV=1	K.MSATFIGNSTAIQELFK.R	0.02238	97.811	0
Q7TMM9	Tubulin beta-2A chain OS=Mus musculus GN=Tubb2a PE=1 SV=1	K.MSATFIGNSTAIQELFK.R	0.01649	98.3778	0
Q7TMM9	Tubulin beta-2A chain OS=Mus musculus GN=Tubb2a PE=1 SV=1	K.MSATFIGNSTAIQELFKR.I	0.00858	99.1493	0
Q7TMM9	Tubulin beta-2A chain OS=Mus musculus GN=Tubb2a PE=1 SV=1	R.ISEQFTAMFR.R	0.0224	97.8091	0
O35887	Calumenin OS=Mus musculus GN=Calu PE=1 SV=1	K.VHNDAQNFDYDHDAFLGAEEAK.S	0.01005	99.005	0
O35887	Calumenin OS=Mus musculus GN=Calu PE=1 SV=1	K.VHNDAQNFDYDHDAFLGAEEAK.S	0.00505	99.4975	0
O35887	Calumenin OS=Mus musculus GN=Calu PE=1 SV=1	K.SFDQLTPEESK.E	0.01268	98.7479	0
O35887	Calumenin OS=Mus musculus GN=Calu PE=1 SV=1	K.IDDDKDGFVTVDELK.G	0.00153	99.8472	0
O35887	Calumenin OS=Mus musculus GN=Calu PE=1 SV=1	K.IDDDKDGFVTVDELK.G	0.00478	99.5243	0
O35887	Calumenin OS=Mus musculus GN=Calu PE=1 SV=1	K.DGFVTVDELK.G	0.09211	91.5659	0
O35887	Calumenin OS=Mus musculus GN=Calu PE=1 SV=1	K.GHDLNEDGLVSWEEYK.N	0.0085	99.1572	0
O35887	Calumenin OS=Mus musculus GN=Calu PE=1 SV=1	K.GHDLNEDGLVSWEEYK.N	0.0103	98.9805	0
O35887	Calumenin OS=Mus musculus GN=Calu PE=1 SV=1	K.EEFTAFLHPEEYDYMK.D	0.00324	99.677	0
O35887	Calumenin OS=Mus musculus GN=Calu PE=1 SV=1	K.EEFTAFLHPEEYDYMK.D	0.01162	98.8513	0
O35887	Calumenin OS=Mus musculus GN=Calu PE=1 SV=1	K.NADGFIDLEEYIGDMYSHDGNADEPEWVK.T	0.01346	98.6719	0
O35887	Calumenin OS=Mus musculus GN=Calu PE=1 SV=1	K.NADGFIDLEEYIGDMYSHDGNADEPEWVK.T	0.00582	99.4214	0
O35887	Calumenin OS=Mus musculus GN=Calu PE=1 SV=1	R.EQFVEFR.D	0.01645	98.3816	0
Q9WTP7	GTP:AMP phosphotransferase AK3, mitochondrial OS=Mus musculus GN=Ak3 PE=1 SV=3	R.QNMLQGTEIGVLAK.T	0.01276	98.7401	0
Q9WTP7	GTP:AMP phosphotransferase AK3, mitochondrial OS=Mus musculus GN=Ak3 PE=1 SV=3	R.TLPQAEALDK.V	0.01748	98.282	0
Q9WTP7	GTP:AMP phosphotransferase AK3, mitochondrial OS=Mus musculus GN=Ak3 PE=1 SV=3	R.TLPQAEALDKVYQIDTVINLNVPFEVIK.Q	0.02699	97.3719	0
Q9WTP7	GTP:AMP phosphotransferase AK3, mitochondrial OS=Mus musculus GN=Ak3 PE=1 SV=3	K.VYQIDTVINLNVPFEVIK.Q	0.0302	97.0685	0
Q9WTP7	GTP:AMP phosphotransferase AK3, mitochondrial OS=Mus musculus GN=Ak3 PE=1 SV=3	K.TVGIDDLTGEPLIQR.E	0.00344	99.6572	0
Q9WTP7	GTP:AMP phosphotransferase AK3, mitochondrial OS=Mus musculus GN=Ak3 PE=1 SV=3	K.AYEAQTEPVLQYYQK.K	0.00174	99.8263	0
Q9WTP7	GTP:AMP phosphotransferase AK3, mitochondrial OS=Mus musculus GN=Ak3 PE=1 SV=3	K.AYEAQTEPVLQYYQK.K	0.02936	97.1477	0
Q9WTP7	GTP:AMP phosphotransferase AK3, mitochondrial OS=Mus musculus GN=Ak3 PE=1 SV=3	K.KGVLETFSGTETNK.I	0.07392	93.1168	0
Q9WTP7	GTP:AMP phosphotransferase AK3, mitochondrial OS=Mus musculus GN=Ak3 PE=1 SV=3	K.GVLETFSGTETNK.I	0.01542	98.4814	0
Q9WTP7	GTP:AMP phosphotransferase AK3, mitochondrial OS=Mus musculus GN=Ak3 PE=1 SV=3	K.IWPHVYSFLQTK.V	0.0659	93.8174	0
Q9WTP7	GTP:AMP phosphotransferase AK3, mitochondrial OS=Mus musculus GN=Ak3 PE=1 SV=3	K.IWPHVYSFLQTK.V	0.0193	98.1065	0
Q59J78	Mimitin, mitochondrial OS=Mus musculus GN=Ndufaf2 PE=2 SV=1	K.ETSEELLPSPTATQVK.G	0.01339	98.6787	0
Q59J78	Mimitin, mitochondrial OS=Mus musculus GN=Ndufaf2 PE=2 SV=1	K.TFQPGSWTPEDGKR.Q	0.02872	97.2082	0
P27773	Protein disulfide-isomerase A3 OS=Mus musculus GN=Pdia3 PE=1 SV=2	A.SDVLELTDENFESR.V	0.00943	99.0658	0
P27773	Protein disulfide-isomerase A3 OS=Mus musculus GN=Pdia3 PE=1 SV=2	R.LAPEYEAAATR.L	0.02828	97.2498	0
P27773	Protein disulfide-isomerase A3 OS=Mus musculus GN=Pdia3 PE=1 SV=2	K.YGVSGYPTLK.I	0.01243	98.7723	0
P27773	Protein disulfide-isomerase A3 OS=Mus musculus GN=Pdia3 PE=1 SV=2	K.IFRDGEEAGAYDGPR.T	0.00592	99.4115	0
P27773	Protein disulfide-isomerase A3 OS=Mus musculus GN=Pdia3 PE=1 SV=2	K.FISDKDASVVGF.F	9.41444	9.60205	0
P27773	Protein disulfide-isomerase A3 OS=Mus musculus GN=Pdia3 PE=1 SV=2	K.FISDKDASVVGFFR.D	0.00372	99.6294	0
P27773	Protein disulfide-isomerase A3 OS=Mus musculus GN=Pdia3 PE=1 SV=2	K.FISDKDASVVGFFR.D	0.00909	99.0992	0
P27773	Protein disulfide-isomerase A3 OS=Mus musculus GN=Pdia3 PE=1 SV=2	K.DASVVGFFR.D	0.00979	99.0305	0
P27773	Protein disulfide-isomerase A3 OS=Mus musculus GN=Pdia3 PE=1 SV=2	R.DLFSDGHSEFLK.A	0.01471	98.5503	0
P27773	Protein disulfide-isomerase A3 OS=Mus musculus GN=Pdia3 PE=1 SV=2	R.DLFSDGHSEFLK.A	0.01144	98.8689	0
P27773	Protein disulfide-isomerase A3 OS=Mus musculus GN=Pdia3 PE=1 SV=2	R.FAHTNIESLVK.E	0.01126	98.8865	0
P27773	Protein disulfide-isomerase A3 OS=Mus musculus GN=Pdia3 PE=1 SV=2	R.FAHTNIESLVK.E	0.03072	97.0196	0
P27773	Protein disulfide-isomerase A3 OS=Mus musculus GN=Pdia3 PE=1 SV=2	K.EYDDNGEGITIFR.P	0.00811	99.1955	0
P27773	Protein disulfide-isomerase A3 OS=Mus musculus GN=Pdia3 PE=1 SV=2	K.EYDDNGEGITIFRPLHLANK.F	0.00783	99.2231	0
P27773	Protein disulfide-isomerase A3 OS=Mus musculus GN=Pdia3 PE=1 SV=2	H.MTEDNKDLIQGK.D	0.00291	99.7098	0
P27773	Protein disulfide-isomerase A3 OS=Mus musculus GN=Pdia3 PE=1 SV=2	K.DLLTAYYDVDYEK.N	0.01388	98.631	0
P27773	Protein disulfide-isomerase A3 OS=Mus musculus GN=Pdia3 PE=1 SV=2	R.KTFSHELSDFGLESTTGEVPVVAIR.T	0.01497	98.5251	0
P27773	Protein disulfide-isomerase A3 OS=Mus musculus GN=Pdia3 PE=1 SV=2	K.TFSHELSDFGLESTTGEVPVVAIR.T	0.06587	93.8201	0
P27773	Protein disulfide-isomerase A3 OS=Mus musculus GN=Pdia3 PE=1 SV=2	H.ELSDFGLESTTGEVPVVAIR.T	0.09892	90.9984	0
P27773	Protein disulfide-isomerase A3 OS=Mus musculus GN=Pdia3 PE=1 SV=2	D.FGLESTTGEVPVVAIR.T	0.01702	98.3265	0
P27773	Protein disulfide-isomerase A3 OS=Mus musculus GN=Pdia3 PE=1 SV=2	K.FVMQEEFSR.D	0.00743	99.2625	0
P27773	Protein disulfide-isomerase A3 OS=Mus musculus GN=Pdia3 PE=1 SV=2	K.ALEQFLQEYFDGNLK.R	0.00907	99.1012	0
P27773	Protein disulfide-isomerase A3 OS=Mus musculus GN=Pdia3 PE=1 SV=2	K.ALEQFLQEYFDGNLK.R	0.01116	98.8963	0
P27773	Protein disulfide-isomerase A3 OS=Mus musculus GN=Pdia3 PE=1 SV=2	K.ALEQFLQEYFDGNLKR.Y	0.03117	96.9772	0
P27773	Protein disulfide-isomerase A3 OS=Mus musculus GN=Pdia3 PE=1 SV=2	K.LSKDPNIVIAK.M	0.01146	98.867	0
P27773	Protein disulfide-isomerase A3 OS=Mus musculus GN=Pdia3 PE=1 SV=2	K.MDATANDVPSPYEVK.G	0.02597	97.4687	0
P27773	Protein disulfide-isomerase A3 OS=Mus musculus GN=Pdia3 PE=1 SV=2	K.GFPTIYFSPANK.K	0.02084	97.9585	0
P27773	Protein disulfide-isomerase A3 OS=Mus musculus GN=Pdia3 PE=1 SV=2	K.GFPTIYFSPANKK.L	0.00038	99.962	0
P27773	Protein disulfide-isomerase A3 OS=Mus musculus GN=Pdia3 PE=1 SV=2	R.ELNDFISYLQR.E	0.03436	96.6781	0
P27773	Protein disulfide-isomerase A3 OS=Mus musculus GN=Pdia3 PE=1 SV=2	R.EATNPPIIQEEKPK.K	0.00712	99.293	0
Q9CQ22	Ragulator complex protein LAMTOR1 OS=Mus musculus GN=Lamtor1 PE=1 SV=1	R.TDEQALLSSILAK.T	0.01157	98.8562	0
Q9CQ22	Ragulator complex protein LAMTOR1 OS=Mus musculus GN=Lamtor1 PE=1 SV=1	R.LAVLSSSLTHWK.K	0.00998	99.0119	0
O35129	Prohibitin-2 OS=Mus musculus GN=Phb2 PE=1 SV=1	K.LLLGAGAVAYGVR.E	0.01453	98.5678	0
O35129	Prohibitin-2 OS=Mus musculus GN=Phb2 PE=1 SV=1	R.ESVFTVEGGHR.A	0.02704	97.3672	0
O35129	Prohibitin-2 OS=Mus musculus GN=Phb2 PE=1 SV=1	R.IPWFQYPIIYDIR.A	0.02721	97.3511	0
O35129	Prohibitin-2 OS=Mus musculus GN=Phb2 PE=1 SV=1	R.IPWFQYPIIYDIR.A	0.01417	98.6028	0
O35129	Prohibitin-2 OS=Mus musculus GN=Phb2 PE=1 SV=1	K.DLQMVNISLR.V	0.02537	97.5258	0
O35129	Prohibitin-2 OS=Mus musculus GN=Phb2 PE=1 SV=1	R.VLSRPNAQELPSMYQR.L	0.00414	99.5877	0
O35129	Prohibitin-2 OS=Mus musculus GN=Phb2 PE=1 SV=1	R.LGLDYEER.V	0.01221	98.7937	0
O35129	Prohibitin-2 OS=Mus musculus GN=Phb2 PE=1 SV=1	R.VLPSIVNEVLK.S	0.01555	98.4688	0
O35129	Prohibitin-2 OS=Mus musculus GN=Phb2 PE=1 SV=1	K.FNASQLITQR.A	0.03228	96.8729	0
O35129	Prohibitin-2 OS=Mus musculus GN=Phb2 PE=1 SV=1	R.AQFLVEK.A	0.01805	98.227	0
O35129	Prohibitin-2 OS=Mus musculus GN=Phb2 PE=1 SV=1	R.IYLTADNLVLNLQDESFTR.G	0.02485	97.5753	0
P99024	Tubulin beta-5 chain OS=Mus musculus GN=Tubb5 PE=1 SV=1	K.FWEVISDEHGIDPTGTYHGDSDLQLDR.I	0.01388	98.631	0
P99024	Tubulin beta-5 chain OS=Mus musculus GN=Tubb5 PE=1 SV=1	R.ISVYYNEATGGK.Y	0.02486	97.5743	0
P99024	Tubulin beta-5 chain OS=Mus musculus GN=Tubb5 PE=1 SV=1	R.AILVDLEPGTMDSVR.S	0.0166	98.3671	0
P99024	Tubulin beta-5 chain OS=Mus musculus GN=Tubb5 PE=1 SV=1	R.AILVDLEPGTMDSVR.S	0.06085	94.264	0
P99024	Tubulin beta-5 chain OS=Mus musculus GN=Tubb5 PE=1 SV=1	R.SGPFGQIFRPDNFVFGQSGAGNNWA.K	0.01914	98.1219	0
P99024	Tubulin beta-5 chain OS=Mus musculus GN=Tubb5 PE=1 SV=1	R.SGPFGQIFRPDNFVFGQSGAGNNWAK.G	0.00893	99.1149	0
P99024	Tubulin beta-5 chain OS=Mus musculus GN=Tubb5 PE=1 SV=1	A.KGHYTEGAELVDSVLDVVR.K	0.00934	99.0746	0
P99024	Tubulin beta-5 chain OS=Mus musculus GN=Tubb5 PE=1 SV=1	K.GHYTEGAELVDSVLDVVR.K	0.03349	96.7595	0
P99024	Tubulin beta-5 chain OS=Mus musculus GN=Tubb5 PE=1 SV=1	R.IMNTFSVVPSPK.V	0.04671	95.5374	0
P99024	Tubulin beta-5 chain OS=Mus musculus GN=Tubb5 PE=1 SV=1	R.KLAVNMVPFPR.L	0.00234	99.7665	0
P99024	Tubulin beta-5 chain OS=Mus musculus GN=Tubb5 PE=1 SV=1	K.LAVNMVPFPR.L	0.02546	97.5172	0
P99024	Tubulin beta-5 chain OS=Mus musculus GN=Tubb5 PE=1 SV=1	R.LHFFMPGFAPLTSR.G	0.02201	97.8464	0
P99024	Tubulin beta-5 chain OS=Mus musculus GN=Tubb5 PE=1 SV=1	R.ALTVPELTQQVFDAK.N	0.04232	95.9398	0
P99024	Tubulin beta-5 chain OS=Mus musculus GN=Tubb5 PE=1 SV=1	R.ALTVPELTQQVFDAK.N	0.0191	98.1258	0
P99024	Tubulin beta-5 chain OS=Mus musculus GN=Tubb5 PE=1 SV=1	K.EVDEQMLNVQNK.N	0.02609	97.4573	0
P99024	Tubulin beta-5 chain OS=Mus musculus GN=Tubb5 PE=1 SV=1	K.NSSYFVEWIPNNVK.T	0.02704	97.3672	0
P99024	Tubulin beta-5 chain OS=Mus musculus GN=Tubb5 PE=1 SV=1	K.NSSYFVEWIPNNVK.T	0.01088	98.9237	0
P99024	Tubulin beta-5 chain OS=Mus musculus GN=Tubb5 PE=1 SV=1	N.SSYFVEWIPNNVK.T	0.11166	89.9556	0
P99024	Tubulin beta-5 chain OS=Mus musculus GN=Tubb5 PE=1 SV=1	K.MAVTFIGNSTAIQELFK.R	0.03189	96.9096	0
P99024	Tubulin beta-5 chain OS=Mus musculus GN=Tubb5 PE=1 SV=1	K.MAVTFIGNSTAIQELFK.R	0.03524	96.596	0
P99024	Tubulin beta-5 chain OS=Mus musculus GN=Tubb5 PE=1 SV=1	K.MAVTFIGNSTAIQELFKR.I	0.01421	98.5989	0
P99024	Tubulin beta-5 chain OS=Mus musculus GN=Tubb5 PE=1 SV=1	R.ISEQFTAMFR.R	0.0224	97.8091	0
P68372	Tubulin beta-4B chain OS=Mus musculus GN=Tubb4b PE=1 SV=1	R.INVYYNEATGGK.Y	0.03307	96.7989	0
P68372	Tubulin beta-4B chain OS=Mus musculus GN=Tubb4b PE=1 SV=1	R.AVLVDLEPGTMDSVR.S	0.03159	96.9377	0
P68372	Tubulin beta-4B chain OS=Mus musculus GN=Tubb4b PE=1 SV=1	R.SGPFGQIFRPDNFVFGQSGAGNNWA.K	0.01914	98.1219	0
P68372	Tubulin beta-4B chain OS=Mus musculus GN=Tubb4b PE=1 SV=1	R.SGPFGQIFRPDNFVFGQSGAGNNWAK.G	0.00893	99.1149	0
P68372	Tubulin beta-4B chain OS=Mus musculus GN=Tubb4b PE=1 SV=1	A.KGHYTEGAELVDSVLDVVR.K	0.00934	99.0746	0
P68372	Tubulin beta-4B chain OS=Mus musculus GN=Tubb4b PE=1 SV=1	K.GHYTEGAELVDSVLDVVR.K	0.03349	96.7595	0
P68372	Tubulin beta-4B chain OS=Mus musculus GN=Tubb4b PE=1 SV=1	R.IMNTFSVVPSPK.V	0.04671	95.5374	0
P68372	Tubulin beta-4B chain OS=Mus musculus GN=Tubb4b PE=1 SV=1	R.KLAVNMVPFPR.L	0.00234	99.7665	0
P68372	Tubulin beta-4B chain OS=Mus musculus GN=Tubb4b PE=1 SV=1	K.LAVNMVPFPR.L	0.02546	97.5172	0
P68372	Tubulin beta-4B chain OS=Mus musculus GN=Tubb4b PE=1 SV=1	R.LHFFMPGFAPLTSR.G	0.02201	97.8464	0
P68372	Tubulin beta-4B chain OS=Mus musculus GN=Tubb4b PE=1 SV=1	R.ALTVPELTQQMFDAK.N	0.02648	97.4203	0
P68372	Tubulin beta-4B chain OS=Mus musculus GN=Tubb4b PE=1 SV=1	R.ALTVPELTQQMFDAK.N	0.02152	97.8933	0
P68372	Tubulin beta-4B chain OS=Mus musculus GN=Tubb4b PE=1 SV=1	K.EVDEQMLNVQNK.N	0.02609	97.4573	0
P68372	Tubulin beta-4B chain OS=Mus musculus GN=Tubb4b PE=1 SV=1	K.NSSYFVEWIPNNVK.T	0.02704	97.3672	0
P68372	Tubulin beta-4B chain OS=Mus musculus GN=Tubb4b PE=1 SV=1	K.NSSYFVEWIPNNVK.T	0.01088	98.9237	0
P68372	Tubulin beta-4B chain OS=Mus musculus GN=Tubb4b PE=1 SV=1	N.SSYFVEWIPNNVK.T	0.11166	89.9556	0
P68372	Tubulin beta-4B chain OS=Mus musculus GN=Tubb4b PE=1 SV=1	K.MSATFIGNSTAIQELFK.R	0.02238	97.811	0
P68372	Tubulin beta-4B chain OS=Mus musculus GN=Tubb4b PE=1 SV=1	K.MSATFIGNSTAIQELFK.R	0.01649	98.3778	0
P68372	Tubulin beta-4B chain OS=Mus musculus GN=Tubb4b PE=1 SV=1	K.MSATFIGNSTAIQELFKR.I	0.00858	99.1493	0
P68372	Tubulin beta-4B chain OS=Mus musculus GN=Tubb4b PE=1 SV=1	R.ISEQFTAMFR.R	0.0224	97.8091	0
P62309	Small nuclear ribonucleoprotein G OS=Mus musculus GN=Snrpg PE=1 SV=1	R.HVQGILR.G	0.0116	98.8533	0
P08249	Malate dehydrogenase, mitochondrial OS=Mus musculus GN=Mdh2 PE=1 SV=3	N.AKVAVLGASGGIGQPLSLLLK.N	0.00358	99.6433	0
P08249	Malate dehydrogenase, mitochondrial OS=Mus musculus GN=Mdh2 PE=1 SV=3	K.VAVLGASGGIGQPLSLLLK.N	0.03483	96.6342	0
P08249	Malate dehydrogenase, mitochondrial OS=Mus musculus GN=Mdh2 PE=1 SV=3	A.VLGASGGIGQPLSLLLK.N	0.00878	99.1296	0
P08249	Malate dehydrogenase, mitochondrial OS=Mus musculus GN=Mdh2 PE=1 SV=3	V.LGASGGIGQPLSLLLK.N	0.01088	98.9237	0
P08249	Malate dehydrogenase, mitochondrial OS=Mus musculus GN=Mdh2 PE=1 SV=3	L.GASGGIGQPLSLLLK.N	0.0114	98.8728	0
P08249	Malate dehydrogenase, mitochondrial OS=Mus musculus GN=Mdh2 PE=1 SV=3	G.ASGGIGQPLSLLLK.N	0.05805	94.5135	0
P08249	Malate dehydrogenase, mitochondrial OS=Mus musculus GN=Mdh2 PE=1 SV=3	A.SGGIGQPLSLLLK.N	0.01403	98.6164	0
P08249	Malate dehydrogenase, mitochondrial OS=Mus musculus GN=Mdh2 PE=1 SV=3	I.AHTPGVAADLSHIETR.A	0.00158	99.8422	0
P08249	Malate dehydrogenase, mitochondrial OS=Mus musculus GN=Mdh2 PE=1 SV=3	A.HTPGVAADLSHIETR.A	0.08044	92.5549	0
P08249	Malate dehydrogenase, mitochondrial OS=Mus musculus GN=Mdh2 PE=1 SV=3	H.TPGVAADLSHIETR.A	0.00764	99.2418	0
P08249	Malate dehydrogenase, mitochondrial OS=Mus musculus GN=Mdh2 PE=1 SV=3	C.IIANPVNSTIPITAEVFK.K	0.0083	99.1768	0
P08249	Malate dehydrogenase, mitochondrial OS=Mus musculus GN=Mdh2 PE=1 SV=3	I.ANPVNSTIPITAEVFK.K	0.02268	97.7823	0
P08249	Malate dehydrogenase, mitochondrial OS=Mus musculus GN=Mdh2 PE=1 SV=3	I.FGVTTLDIVR.A	0.26903	78.8003	0
P08249	Malate dehydrogenase, mitochondrial OS=Mus musculus GN=Mdh2 PE=1 SV=3	R.ANTFVAELK.G	0.03064	97.0271	0
P08249	Malate dehydrogenase, mitochondrial OS=Mus musculus GN=Mdh2 PE=1 SV=3	R.VNVPVIGGHAGK.T	0.03121	96.9735	0
P08249	Malate dehydrogenase, mitochondrial OS=Mus musculus GN=Mdh2 PE=1 SV=3	K.VDFPQDQLATLTGR.I	0.03135	96.9603	0
P08249	Malate dehydrogenase, mitochondrial OS=Mus musculus GN=Mdh2 PE=1 SV=3	K.VDFPQDQLATLTGR.I	0.08302	92.3344	0
P08249	Malate dehydrogenase, mitochondrial OS=Mus musculus GN=Mdh2 PE=1 SV=3	R.IQEAGTEVVK.A	0.02045	97.996	0
P08249	Malate dehydrogenase, mitochondrial OS=Mus musculus GN=Mdh2 PE=1 SV=3	K.AGAGSATLSMAYAGAR.F	0.01255	98.7606	0
P08249	Malate dehydrogenase, mitochondrial OS=Mus musculus GN=Mdh2 PE=1 SV=3	R.FVFSLVDAMNGK.E	0.02266	97.7842	0
P08249	Malate dehydrogenase, mitochondrial OS=Mus musculus GN=Mdh2 PE=1 SV=3	K.ITPFEEK.M	0.02042	97.9989	0
P08249	Malate dehydrogenase, mitochondrial OS=Mus musculus GN=Mdh2 PE=1 SV=3	K.MIAEAIPELK.A	0.01705	98.3236	0
P08249	Malate dehydrogenase, mitochondrial OS=Mus musculus GN=Mdh2 PE=1 SV=3	K.KGEDFVK.N	0.00254	99.7466	0
P48678	Prelamin-A/C OS=Mus musculus GN=Lmna PE=1 SV=2	R.LQEKEDLQELNDR.L	0.00237	99.7636	0
P48678	Prelamin-A/C OS=Mus musculus GN=Lmna PE=1 SV=2	K.EDLQELNDR.L	0.01175	98.8386	0
P48678	Prelamin-A/C OS=Mus musculus GN=Lmna PE=1 SV=2	R.ITESEEVVSR.E	0.01217	98.7976	0
P48678	Prelamin-A/C OS=Mus musculus GN=Lmna PE=1 SV=2	R.LQLELSK.V	0.01443	98.5775	0
P48678	Prelamin-A/C OS=Mus musculus GN=Lmna PE=1 SV=2	K.DLEALLNSK.E	0.01264	98.7518	0
P48678	Prelamin-A/C OS=Mus musculus GN=Lmna PE=1 SV=2	K.EAALSTALSEK.R	0.01474	98.5474	0
P48678	Prelamin-A/C OS=Mus musculus GN=Lmna PE=1 SV=2	R.TLEGELHDLR.G	0.01117	98.8953	0
P48678	Prelamin-A/C OS=Mus musculus GN=Lmna PE=1 SV=2	K.KQLQDEMLR.R	0.00202	99.7984	0
P48678	Prelamin-A/C OS=Mus musculus GN=Lmna PE=1 SV=2	K.QLQDEMLR.R	0.0122	98.7947	0
P48678	Prelamin-A/C OS=Mus musculus GN=Lmna PE=1 SV=2	K.NIYSEELR.E	0.0095	99.0589	0
P48678	Prelamin-A/C OS=Mus musculus GN=Lmna PE=1 SV=2	R.LADALQELR.A	0.01036	98.9746	0
P48678	Prelamin-A/C OS=Mus musculus GN=Lmna PE=1 SV=2	R.NSNLVGAAHEELQQSR.I	0.01868	98.1663	0
P48678	Prelamin-A/C OS=Mus musculus GN=Lmna PE=1 SV=2	R.NSNLVGAAHEELQQSR.I	0.0267	97.3994	0
P48678	Prelamin-A/C OS=Mus musculus GN=Lmna PE=1 SV=2	N.SNLVGAAHEELQQSR.I	0.0038	99.6214	0
P48678	Prelamin-A/C OS=Mus musculus GN=Lmna PE=1 SV=2	R.IDSLSAQLSQLQK.Q	0.01514	98.5086	0
P48678	Prelamin-A/C OS=Mus musculus GN=Lmna PE=1 SV=2	K.LRDLEDSLAR.E	0.0083	99.1768	0
P48678	Prelamin-A/C OS=Mus musculus GN=Lmna PE=1 SV=2	K.LRDLEDSLAR.E	0.30212	76.7978	0
P48678	Prelamin-A/C OS=Mus musculus GN=Lmna PE=1 SV=2	R.DLEDSLAR.E	0.01299	98.7177	0
P48678	Prelamin-A/C OS=Mus musculus GN=Lmna PE=1 SV=2	R.MQQQLDEYQELLDIK.L	0.01178	98.8357	0
P48678	Prelamin-A/C OS=Mus musculus GN=Lmna PE=1 SV=2	R.MQQQLDEYQELLDIK.L	0.01241	98.7742	0
P48678	Prelamin-A/C OS=Mus musculus GN=Lmna PE=1 SV=2	R.VAVEEVDEEGK.F	0.01556	98.4678	0
P48678	Prelamin-A/C OS=Mus musculus GN=Lmna PE=1 SV=2	R.VAVEEVDEEGKFVR.L	0.00063	99.937	0
P48678	Prelamin-A/C OS=Mus musculus GN=Lmna PE=1 SV=2	R.VAVEEVDEEGKFVR.L	0.00859	99.1483	0
P48678	Prelamin-A/C OS=Mus musculus GN=Lmna PE=1 SV=2	R.NKSNEDQSMGNWQIR.R	0.00223	99.7775	0
P48678	Prelamin-A/C OS=Mus musculus GN=Lmna PE=1 SV=2	R.NKSNEDQSMGNWQIR.R	0.01429	98.5911	0
P48678	Prelamin-A/C OS=Mus musculus GN=Lmna PE=1 SV=2	K.SNEDQSMGNWQIR.R	0.02484	97.5762	0
P48678	Prelamin-A/C OS=Mus musculus GN=Lmna PE=1 SV=2	K.SNEDQSMGNWQIR.R	0.00184	99.8163	0
P48678	Prelamin-A/C OS=Mus musculus GN=Lmna PE=1 SV=2	K.SNEDQSMGNWQIRR.Q	0.10758	90.2869	0
P48678	Prelamin-A/C OS=Mus musculus GN=Lmna PE=1 SV=2	R.QNGDDPLMTYR.F	0.01151	98.8621	0
P48678	Prelamin-A/C OS=Mus musculus GN=Lmna PE=1 SV=2	K.AGQVVTIWASGAGATHSPPTDLVWK.A	0.03734	96.4004	0
P48678	Prelamin-A/C OS=Mus musculus GN=Lmna PE=1 SV=2	R.TALINSTGEEVAMR.K	0.01342	98.6758	0
P48678	Prelamin-A/C OS=Mus musculus GN=Lmna PE=1 SV=2	R.TALINSTGEEVAMRK.L	0.01088	98.9237	0
P48678	Prelamin-A/C OS=Mus musculus GN=Lmna PE=1 SV=2	T.ALINSTGEEVAMR.K	0.00721	99.2842	0
P48678	Prelamin-A/C OS=Mus musculus GN=Lmna PE=1 SV=2	R.SLTMVEDNEDDDEDGEELLHHHR.G	0.01031	98.9795	0
P48678	Prelamin-A/C OS=Mus musculus GN=Lmna PE=1 SV=2	R.SVGGSGGGSFGDNLVTR.S	0.05648	94.6539	0
Q9DB77	Cytochrome b-c1 complex subunit 2, mitochondrial OS=Mus musculus GN=Uqcrc2 PE=1 SV=1	K.TSAAPGGVPLQPQDLEFTK.L	0.0179	98.2415	0
Q9DB77	Cytochrome b-c1 complex subunit 2, mitochondrial OS=Mus musculus GN=Uqcrc2 PE=1 SV=1	K.TSAAPGGVPLQPQDLEFTKL.P	0.0149	98.5319	0
Q9DB77	Cytochrome b-c1 complex subunit 2, mitochondrial OS=Mus musculus GN=Uqcrc2 PE=1 SV=1	K.TSAAPGGVPLQPQDLEFTKLPNGLVIASLENYAPLSR.I	0.01749	98.2811	0
Q9DB77	Cytochrome b-c1 complex subunit 2, mitochondrial OS=Mus musculus GN=Uqcrc2 PE=1 SV=1	K.LPNGLVIASLENYAPLSR.I	0.01464	98.5571	0
Q9DB77	Cytochrome b-c1 complex subunit 2, mitochondrial OS=Mus musculus GN=Uqcrc2 PE=1 SV=1	K.LPNGLVIASLENYAPLSR.I	0.01836	98.1971	0
Q9DB77	Cytochrome b-c1 complex subunit 2, mitochondrial OS=Mus musculus GN=Uqcrc2 PE=1 SV=1	N.GLVIASLENYAPLSR.I	0.01999	98.0402	0
Q9DB77	Cytochrome b-c1 complex subunit 2, mitochondrial OS=Mus musculus GN=Uqcrc2 PE=1 SV=1	R.IIENLHDVAYK.N	0.02596	97.4697	0
Q9DB77	Cytochrome b-c1 complex subunit 2, mitochondrial OS=Mus musculus GN=Uqcrc2 PE=1 SV=1	K.ITSEELHYFVQNHFTSAR.M	0.02647	97.4213	0
Q9DB77	Cytochrome b-c1 complex subunit 2, mitochondrial OS=Mus musculus GN=Uqcrc2 PE=1 SV=1	K.ITSEELHYFVQNHFTSAR.M	0.00749	99.2566	0
Q9DB77	Cytochrome b-c1 complex subunit 2, mitochondrial OS=Mus musculus GN=Uqcrc2 PE=1 SV=1	R.MALVGLGVSHSVLK.Q	0.01362	98.6563	0
Q9DB77	Cytochrome b-c1 complex subunit 2, mitochondrial OS=Mus musculus GN=Uqcrc2 PE=1 SV=1	R.MALVGLGVSHSVLK.Q	0.0256	97.5039	0
Q9DB77	Cytochrome b-c1 complex subunit 2, mitochondrial OS=Mus musculus GN=Uqcrc2 PE=1 SV=1	K.QVAEQFLNMR.G	0.0129	98.7264	0
Q9DB77	Cytochrome b-c1 complex subunit 2, mitochondrial OS=Mus musculus GN=Uqcrc2 PE=1 SV=1	K.AVAQGNLSSADVQAAK.N	0.01688	98.34	0
P51150	Ras-related protein Rab-7a OS=Mus musculus GN=Rab7a PE=1 SV=2	K.VIILGDSGVGK.T	0.01542	98.4814	0
P51150	Ras-related protein Rab-7a OS=Mus musculus GN=Rab7a PE=1 SV=2	K.ATIGADFLTK.E	0.02371	97.6839	0
P51150	Ras-related protein Rab-7a OS=Mus musculus GN=Rab7a PE=1 SV=2	R.LVTMQIWDTAGQER.F	0.01916	98.12	0
P51150	Ras-related protein Rab-7a OS=Mus musculus GN=Rab7a PE=1 SV=2	R.LVTMQIWDTAGQER.F	0.01306	98.7108	0
P51150	Ras-related protein Rab-7a OS=Mus musculus GN=Rab7a PE=1 SV=2	R.FQSLGVAFYR.G	0.01865	98.1691	0
P51150	Ras-related protein Rab-7a OS=Mus musculus GN=Rab7a PE=1 SV=2	K.TLDSWRDEFLIQASPR.D	0.02137	97.9077	0
P51150	Ras-related protein Rab-7a OS=Mus musculus GN=Rab7a PE=1 SV=2	R.DPENFPFVVLGNK.I	0.00925	99.0835	0
P51150	Ras-related protein Rab-7a OS=Mus musculus GN=Rab7a PE=1 SV=2	K.EAINVEQAFQTIAR.N	0.00761	99.2447	0
P51150	Ras-related protein Rab-7a OS=Mus musculus GN=Rab7a PE=1 SV=2	K.EAINVEQAFQTIAR.N	0.0063	99.3739	0
P51150	Ras-related protein Rab-7a OS=Mus musculus GN=Rab7a PE=1 SV=2	K.QETEVELYNEFPEPIKLDK.N	0.07158	93.3201	0
Q7TMF3	NADH dehydrogenase [ubiquinone] 1 alpha subcomplex subunit 12 OS=Mus musculus GN=Ndufa12 PE=2 SV=2	R.GVQQVTGHGGLR.G	0.00786	99.2201	0
Q7TMF3	NADH dehydrogenase [ubiquinone] 1 alpha subcomplex subunit 12 OS=Mus musculus GN=Ndufa12 PE=2 SV=2	R.GVQQVTGHGGLR.G	0.01272	98.744	0
Q7TMF3	NADH dehydrogenase [ubiquinone] 1 alpha subcomplex subunit 12 OS=Mus musculus GN=Ndufa12 PE=2 SV=2	K.NTFWDVDGSMVPPEWHR.W	0.00418	99.5837	0
Q7TMF3	NADH dehydrogenase [ubiquinone] 1 alpha subcomplex subunit 12 OS=Mus musculus GN=Ndufa12 PE=2 SV=2	K.FNVSATPEQYVPYSTTR.K	0.00109	99.8911	0
P63038	60 kDa heat shock protein, mitochondrial OS=Mus musculus GN=Hspd1 PE=1 SV=1	L.MLQGVDLLADAVAVTMGPK.G	0.01757	98.2733	0
P63038	60 kDa heat shock protein, mitochondrial OS=Mus musculus GN=Hspd1 PE=1 SV=1	L.QGVDLLADAVAVTMGPK.G	0.03851	96.2918	0
P63038	60 kDa heat shock protein, mitochondrial OS=Mus musculus GN=Hspd1 PE=1 SV=1	L.QGVDLLADAVAVTMGPK.G	0.01315	98.7021	0
P63038	60 kDa heat shock protein, mitochondrial OS=Mus musculus GN=Hspd1 PE=1 SV=1	Q.GVDLLADAVAVTMGPK.G	0.01415	98.6047	0
P63038	60 kDa heat shock protein, mitochondrial OS=Mus musculus GN=Hspd1 PE=1 SV=1	R.TVIIEQSWGSPK.V	0.035	96.6184	0
P63038	60 kDa heat shock protein, mitochondrial OS=Mus musculus GN=Hspd1 PE=1 SV=1	K.LVQDVANNTNEEAGDGTTTATVLAR.S	0.02796	97.28	0
P63038	60 kDa heat shock protein, mitochondrial OS=Mus musculus GN=Hspd1 PE=1 SV=1	K.LVQDVANNTNEEAGDGTTTATVLAR.S	0.03033	97.0563	0
P63038	60 kDa heat shock protein, mitochondrial OS=Mus musculus GN=Hspd1 PE=1 SV=1	K.QSKPVTTPEEIAQVATISA.N	0.00123	99.8772	0
P63038	60 kDa heat shock protein, mitochondrial OS=Mus musculus GN=Hspd1 PE=1 SV=1	K.QSKPVTTPEEIAQVATISANGDK.D	0.00134	99.8662	0
P63038	60 kDa heat shock protein, mitochondrial OS=Mus musculus GN=Hspd1 PE=1 SV=1	K.QSKPVTTPEEIAQVATISANGDKDIGNIISDAMKK.V	0.00378	99.6234	0
P63038	60 kDa heat shock protein, mitochondrial OS=Mus musculus GN=Hspd1 PE=1 SV=1	K.DIGNIISDAMK.K	0.01892	98.1431	0
P63038	60 kDa heat shock protein, mitochondrial OS=Mus musculus GN=Hspd1 PE=1 SV=1	K.DIGNIISDAMKK.V	0.02162	97.8838	0
P63038	60 kDa heat shock protein, mitochondrial OS=Mus musculus GN=Hspd1 PE=1 SV=1	K.DIGNIISDAMKK.V	0.00498	99.5045	0
P63038	60 kDa heat shock protein, mitochondrial OS=Mus musculus GN=Hspd1 PE=1 SV=1	K.TLNDELEIIEGMK.F	0.01932	98.1046	0
P63038	60 kDa heat shock protein, mitochondrial OS=Mus musculus GN=Hspd1 PE=1 SV=1	K.TLNDELEIIEGMKFDR.G	0.01441	98.5795	0
P63038	60 kDa heat shock protein, mitochondrial OS=Mus musculus GN=Hspd1 PE=1 SV=1	R.GYISPYFINTSK.G	0.03581	96.5428	0
P63038	60 kDa heat shock protein, mitochondrial OS=Mus musculus GN=Hspd1 PE=1 SV=1	K.KISSVQSIVPALEIANAHR.K	0.02184	97.8627	0
P63038	60 kDa heat shock protein, mitochondrial OS=Mus musculus GN=Hspd1 PE=1 SV=1	K.KISSVQSIVPALEIANAHR.K	0.055	94.7867	0
P63038	60 kDa heat shock protein, mitochondrial OS=Mus musculus GN=Hspd1 PE=1 SV=1	K.ISSVQSIVPALEIANAHR.K	0.01745	98.2849	0
P63038	60 kDa heat shock protein, mitochondrial OS=Mus musculus GN=Hspd1 PE=1 SV=1	K.ISSVQSIVPALEIANAHRK.P	0.00083	99.9171	0
P63038	60 kDa heat shock protein, mitochondrial OS=Mus musculus GN=Hspd1 PE=1 SV=1	K.VGLQVVAVK.A	0.01946	98.0911	0
P63038	60 kDa heat shock protein, mitochondrial OS=Mus musculus GN=Hspd1 PE=1 SV=1	K.VGEVIVTK.D	0.02261	97.789	0
P63038	60 kDa heat shock protein, mitochondrial OS=Mus musculus GN=Hspd1 PE=1 SV=1	K.VGEVIVTKDDAMLLK.G	0.01763	98.2675	0
P63038	60 kDa heat shock protein, mitochondrial OS=Mus musculus GN=Hspd1 PE=1 SV=1	K.DDAMLLK.G	0.0151	98.5125	0
P63038	60 kDa heat shock protein, mitochondrial OS=Mus musculus GN=Hspd1 PE=1 SV=1	K.LSDGVAVLK.V	0.02433	97.6248	0
P63038	60 kDa heat shock protein, mitochondrial OS=Mus musculus GN=Hspd1 PE=1 SV=1	K.VGGTSDVEVNEK.K	0.0304	97.0497	0
P63038	60 kDa heat shock protein, mitochondrial OS=Mus musculus GN=Hspd1 PE=1 SV=1	K.DRVTDALNATR.A	0.03786	96.3521	0
P63038	60 kDa heat shock protein, mitochondrial OS=Mus musculus GN=Hspd1 PE=1 SV=1	K.IGIEIIKR.A	0.00109	99.8911	0
P63038	60 kDa heat shock protein, mitochondrial OS=Mus musculus GN=Hspd1 PE=1 SV=1	K.IPAMTIAK.N	0.02368	97.6868	0
P63038	60 kDa heat shock protein, mitochondrial OS=Mus musculus GN=Hspd1 PE=1 SV=1	S.SSEVGYDAMLGDFVNMVEK.G	0.01487	98.5348	0
P63038	60 kDa heat shock protein, mitochondrial OS=Mus musculus GN=Hspd1 PE=1 SV=1	S.SSEVGYDAMLGDFVNMVEK.G	0.03199	96.9002	0
P63038	60 kDa heat shock protein, mitochondrial OS=Mus musculus GN=Hspd1 PE=1 SV=1	R.TALLDAAGVASLLTTAEAVVTEIPKEEK.D	0.24749	80.161	0
P63038	60 kDa heat shock protein, mitochondrial OS=Mus musculus GN=Hspd1 PE=1 SV=1	R.TALLDAAGVASLLTTAEAVVTEIPKEEKDPGMGAMGGMGGGMGGGMF.-	0.05411	94.8668	0
P63038	60 kDa heat shock protein, mitochondrial OS=Mus musculus GN=Hspd1 PE=1 SV=1	D.AAGVASLLTTAEAVVTEIPKEEK.D	0.10206	90.7392	0
P63038	60 kDa heat shock protein, mitochondrial OS=Mus musculus GN=Hspd1 PE=1 SV=1	A.AGVASLLTTAEAVVTEIPKEEK.D	0.02309	97.7431	0
P97457	Myosin regulatory light chain 2, skeletal muscle isoform OS=Mus musculus GN=Mylpf PE=1 SV=3	R.RAGAEGSSNVFSMFDQTQIQEFK.E	0.04826	95.3962	0
P97457	Myosin regulatory light chain 2, skeletal muscle isoform OS=Mus musculus GN=Mylpf PE=1 SV=3	R.AGAEGSSNVFSMFDQTQIQEFK.E	0.00921	99.0874	0
P97457	Myosin regulatory light chain 2, skeletal muscle isoform OS=Mus musculus GN=Mylpf PE=1 SV=3	R.AGAEGSSNVFSMFDQTQIQEFK.E	0.04275	95.9003	0
P97457	Myosin regulatory light chain 2, skeletal muscle isoform OS=Mus musculus GN=Mylpf PE=1 SV=3	R.AGAEGSSNVFSMFDQTQIQEFKEAFTVIDQNR.D	0.02285	97.766	0
P97457	Myosin regulatory light chain 2, skeletal muscle isoform OS=Mus musculus GN=Mylpf PE=1 SV=3	F.SMFDQTQIQEFK.E	0.02257	97.7928	0
P97457	Myosin regulatory light chain 2, skeletal muscle isoform OS=Mus musculus GN=Mylpf PE=1 SV=3	K.EAFTVIDQNR.D	0.02188	97.8588	0
P97457	Myosin regulatory light chain 2, skeletal muscle isoform OS=Mus musculus GN=Mylpf PE=1 SV=3	R.DGIIDKEDLR.D	0.00136	99.8642	0
P97457	Myosin regulatory light chain 2, skeletal muscle isoform OS=Mus musculus GN=Mylpf PE=1 SV=3	R.DTFAAMGR.L	0.00539	99.4639	0
P97457	Myosin regulatory light chain 2, skeletal muscle isoform OS=Mus musculus GN=Mylpf PE=1 SV=3	R.LNVKNEELDAMMK.E	0.00708	99.297	0
P97457	Myosin regulatory light chain 2, skeletal muscle isoform OS=Mus musculus GN=Mylpf PE=1 SV=3	K.NEELDAMMK.E	0.00916	99.0923	0
P97457	Myosin regulatory light chain 2, skeletal muscle isoform OS=Mus musculus GN=Mylpf PE=1 SV=3	K.EASGPINFTVFLTMFGEK.L	0.0088	99.1277	0
P97457	Myosin regulatory light chain 2, skeletal muscle isoform OS=Mus musculus GN=Mylpf PE=1 SV=3	K.EASGPINFTVFLTMFGEK.L	0.01067	98.9443	0
P97457	Myosin regulatory light chain 2, skeletal muscle isoform OS=Mus musculus GN=Mylpf PE=1 SV=3	K.GADPEDVITGAFK.V	0.01356	98.6621	0
Q8BMK4	Cytoskeleton-associated protein 4 OS=Mus musculus GN=Ckap4 PE=1 SV=2	R.DELGQGLQGVEQK.V	0.00847	99.1601	0
Q8BMK4	Cytoskeleton-associated protein 4 OS=Mus musculus GN=Ckap4 PE=1 SV=2	K.LQNEILK.D	0.01336	98.6816	0
Q8BMK4	Cytoskeleton-associated protein 4 OS=Mus musculus GN=Ckap4 PE=1 SV=2	K.LQNEILKDLSDGIHVVK.D	0.00338	99.6631	0
Q8BMK4	Cytoskeleton-associated protein 4 OS=Mus musculus GN=Ckap4 PE=1 SV=2	K.DLSDGIHVVK.D	0.02579	97.4858	0
Q8BMK4	Cytoskeleton-associated protein 4 OS=Mus musculus GN=Ckap4 PE=1 SV=2	R.ERDFTSLENTVEER.L	0.00332	99.6691	0
Q8BMK4	Cytoskeleton-associated protein 4 OS=Mus musculus GN=Ckap4 PE=1 SV=2	R.ERDFTSLENTVEER.L	0.0493	95.3016	0
Q8BMK4	Cytoskeleton-associated protein 4 OS=Mus musculus GN=Ckap4 PE=1 SV=2	R.DFTSLENTVEER.L	0.01189	98.825	0
Q8BMK4	Cytoskeleton-associated protein 4 OS=Mus musculus GN=Ckap4 PE=1 SV=2	K.SINDNIAIFTDVQKR.S	0.00466	99.5362	0
Q8BMK4	Cytoskeleton-associated protein 4 OS=Mus musculus GN=Ckap4 PE=1 SV=2	K.SSLQTMESDVYTEVR.E	0.02664	97.4051	0
Q8BMK4	Cytoskeleton-associated protein 4 OS=Mus musculus GN=Ckap4 PE=1 SV=2	R.LALQALTEK.L	0.02998	97.0893	0
Q8BMK4	Cytoskeleton-associated protein 4 OS=Mus musculus GN=Ckap4 PE=1 SV=2	R.LEEELQQLK.V	0.01029	98.9815	0
Q8BMK4	Cytoskeleton-associated protein 4 OS=Mus musculus GN=Ckap4 PE=1 SV=2	R.HTESLESLLSK.S	0.01548	98.4756	0
Q8BMK4	Cytoskeleton-associated protein 4 OS=Mus musculus GN=Ckap4 PE=1 SV=2	R.LAMLQEHVGNLGSSSDLASTVR.S	0.02568	97.4963	0
Q8BMK4	Cytoskeleton-associated protein 4 OS=Mus musculus GN=Ckap4 PE=1 SV=2	K.QSLGELPGTVESLQEQVLSLLSQDQAQAEGLPPQDFLDR.L	0.0085	99.1572	0
Q8BMK4	Cytoskeleton-associated protein 4 OS=Mus musculus GN=Ckap4 PE=1 SV=2	K.QSLGELPGTVESLQEQVLSLLSQDQAQAEGLPPQDFLDR.L	0.01795	98.2367	0
Q8BMK4	Cytoskeleton-associated protein 4 OS=Mus musculus GN=Ckap4 PE=1 SV=2	R.LSSLDNLK.S	0.05665	94.6387	0
Q8BMK4	Cytoskeleton-associated protein 4 OS=Mus musculus GN=Ckap4 PE=1 SV=2	K.SSVSQVESDLK.M	0.01414	98.6057	0
Q8BMK4	Cytoskeleton-associated protein 4 OS=Mus musculus GN=Ckap4 PE=1 SV=2	K.GLLDDLRNDLDR.L	0.0092	99.0884	0
P97450	ATP synthase-coupling factor 6, mitochondrial OS=Mus musculus GN=Atp5j PE=1 SV=1	R.QASGGPVDIGPEYQQDLDR.E	0.01782	98.2492	0
P97450	ATP synthase-coupling factor 6, mitochondrial OS=Mus musculus GN=Atp5j PE=1 SV=1	R.QASGGPVDIGPEYQQDLDR.E	0.0311	96.9838	0
P97450	ATP synthase-coupling factor 6, mitochondrial OS=Mus musculus GN=Atp5j PE=1 SV=1	K.GEMDTFPTFK.F	0.01986	98.0527	0
P97450	ATP synthase-coupling factor 6, mitochondrial OS=Mus musculus GN=Atp5j PE=1 SV=1	K.FDDPKFEVIDKPQS.-	0.00487	99.5154	0
P97450	ATP synthase-coupling factor 6, mitochondrial OS=Mus musculus GN=Atp5j PE=1 SV=1	K.FDDPKFEVIDKPQS.-	0.00314	99.687	0
P97450	ATP synthase-coupling factor 6, mitochondrial OS=Mus musculus GN=Atp5j PE=1 SV=1	K.FEVIDKPQS.-	0.01401	98.6184	0
P26443	Glutamate dehydrogenase 1, mitochondrial OS=Mus musculus GN=Glud1 PE=1 SV=1	Y.SEAAADREDDPNFFK.M	0.00632	99.372	0
P26443	Glutamate dehydrogenase 1, mitochondrial OS=Mus musculus GN=Glud1 PE=1 SV=1	Y.SEAAADREDDPNFFK.M	0.00268	99.7327	0
P26443	Glutamate dehydrogenase 1, mitochondrial OS=Mus musculus GN=Glud1 PE=1 SV=1	R.EDDPNFFK.M	0.01602	98.4233	0
P26443	Glutamate dehydrogenase 1, mitochondrial OS=Mus musculus GN=Glud1 PE=1 SV=1	K.MVEGFFDR.G	0.01251	98.7645	0
P26443	Glutamate dehydrogenase 1, mitochondrial OS=Mus musculus GN=Glud1 PE=1 SV=1	R.GASIVEDKLVEDLK.T	0.00672	99.3325	0
P26443	Glutamate dehydrogenase 1, mitochondrial OS=Mus musculus GN=Glud1 PE=1 SV=1	H.VLSLSFPIR.R	0.00679	99.3256	0
P26443	Glutamate dehydrogenase 1, mitochondrial OS=Mus musculus GN=Glud1 PE=1 SV=1	R.RDDGSWEVIEGYR.A	0.00083	99.9171	0
P26443	Glutamate dehydrogenase 1, mitochondrial OS=Mus musculus GN=Glud1 PE=1 SV=1	R.RDDGSWEVIEGYR.A	0.00404	99.5976	0
P26443	Glutamate dehydrogenase 1, mitochondrial OS=Mus musculus GN=Glud1 PE=1 SV=1	R.DDGSWEVIEGYR.A	0.01332	98.6855	0
P26443	Glutamate dehydrogenase 1, mitochondrial OS=Mus musculus GN=Glud1 PE=1 SV=1	K.ALASLMTYK.C	0.01799	98.2328	0
P26443	Glutamate dehydrogenase 1, mitochondrial OS=Mus musculus GN=Glud1 PE=1 SV=1	K.NYTDNELEK.I	0.02023	98.0171	0
P26443	Glutamate dehydrogenase 1, mitochondrial OS=Mus musculus GN=Glud1 PE=1 SV=1	R.FTMELAK.K	0.01201	98.8133	0
P26443	Glutamate dehydrogenase 1, mitochondrial OS=Mus musculus GN=Glud1 PE=1 SV=1	K.KGFIGPGIDVPAPDMSTGER.E	0.02007	98.0325	0
P26443	Glutamate dehydrogenase 1, mitochondrial OS=Mus musculus GN=Glud1 PE=1 SV=1	K.GFIGPGIDVPAPDMSTGER.E	0.01454	98.5668	0
P26443	Glutamate dehydrogenase 1, mitochondrial OS=Mus musculus GN=Glud1 PE=1 SV=1	K.GFIGPGIDVPAPDMSTGER.E	0.07365	93.1402	0
P26443	Glutamate dehydrogenase 1, mitochondrial OS=Mus musculus GN=Glud1 PE=1 SV=1	F.IGPGIDVPAPDMSTGER.E	0.01358	98.6602	0
P26443	Glutamate dehydrogenase 1, mitochondrial OS=Mus musculus GN=Glud1 PE=1 SV=1	R.GVFHGIENFINEASYMSILGMTPGFGDK.T	0.07531	92.9964	0
P26443	Glutamate dehydrogenase 1, mitochondrial OS=Mus musculus GN=Glud1 PE=1 SV=1	R.GVFHGIENFINEASYMSILGMTPGFGDK.T	0.03975	96.177	0
P26443	Glutamate dehydrogenase 1, mitochondrial OS=Mus musculus GN=Glud1 PE=1 SV=1	A.SYMSILGMTPGFGDK.T	0.01822	98.2106	0
P26443	Glutamate dehydrogenase 1, mitochondrial OS=Mus musculus GN=Glud1 PE=1 SV=1	Y.MSILGMTPGFGDK.T	0.0234	97.7135	0
P26443	Glutamate dehydrogenase 1, mitochondrial OS=Mus musculus GN=Glud1 PE=1 SV=1	K.LQHGSILGFPK.A	0.02892	97.1893	0
P26443	Glutamate dehydrogenase 1, mitochondrial OS=Mus musculus GN=Glud1 PE=1 SV=1	K.LQHGSILGFPK.A	0.01251	98.7645	0
P26443	Glutamate dehydrogenase 1, mitochondrial OS=Mus musculus GN=Glud1 PE=1 SV=1	K.IIAEGANGPTTPEADK.I	0.0157	98.4543	0
P26443	Glutamate dehydrogenase 1, mitochondrial OS=Mus musculus GN=Glud1 PE=1 SV=1	K.IIAEGANGPTTPEADKIFL.E	0.01003	99.007	0
P26443	Glutamate dehydrogenase 1, mitochondrial OS=Mus musculus GN=Glud1 PE=1 SV=1	K.IIAEGANGPTTPEADKIFLER.N	0.00041	99.959	0
P26443	Glutamate dehydrogenase 1, mitochondrial OS=Mus musculus GN=Glud1 PE=1 SV=1	K.IIAEGANGPTTPEADKIFLER.N	0.00699	99.3059	0
P26443	Glutamate dehydrogenase 1, mitochondrial OS=Mus musculus GN=Glud1 PE=1 SV=1	K.HGGTIPVVPTAEFQDR.I	0.01384	98.6349	0
P26443	Glutamate dehydrogenase 1, mitochondrial OS=Mus musculus GN=Glud1 PE=1 SV=1	K.HGGTIPVVPTAEFQDR.I	0.01247	98.7684	0
P26443	Glutamate dehydrogenase 1, mitochondrial OS=Mus musculus GN=Glud1 PE=1 SV=1	R.ISGASEKDIVHSGLAYTMER.S	0.01406	98.6135	0
P26443	Glutamate dehydrogenase 1, mitochondrial OS=Mus musculus GN=Glud1 PE=1 SV=1	R.ISGASEKDIVHSGLAYTMER.S	0.03368	96.7417	0
P26443	Glutamate dehydrogenase 1, mitochondrial OS=Mus musculus GN=Glud1 PE=1 SV=1	K.DIVHSGLAYTMER.S	0.01073	98.9384	0
P26443	Glutamate dehydrogenase 1, mitochondrial OS=Mus musculus GN=Glud1 PE=1 SV=1	K.DIVHSGLAYTMER.S	0.01373	98.6456	0
P26443	Glutamate dehydrogenase 1, mitochondrial OS=Mus musculus GN=Glud1 PE=1 SV=1	K.YNLGLDLR.T	0.01303	98.7138	0
P26443	Glutamate dehydrogenase 1, mitochondrial OS=Mus musculus GN=Glud1 PE=1 SV=1	R.TAAYVNAIEK.V	0.03457	96.6585	0
P08207	Protein S100-A10 OS=Mus musculus GN=S100a10 PE=1 SV=2	M.PSQMEHAMETMMLTFHR.F	0.03099	96.9942	0
P08207	Protein S100-A10 OS=Mus musculus GN=S100a10 PE=1 SV=2	R.EFPGFLENQK.D	0.02272	97.7785	0
P08207	Protein S100-A10 OS=Mus musculus GN=S100a10 PE=1 SV=2	R.EFPGFLENQKDPLAVDK.I	5e-05	99.995	0
P08207	Protein S100-A10 OS=Mus musculus GN=S100a10 PE=1 SV=2	R.EFPGFLENQKDPLAVDK.I	0.00403	99.5986	0
Q9CQX8	28S ribosomal protein S36, mitochondrial OS=Mus musculus GN=Mrps36 PE=1 SV=1	R.VVQVVKPHAPLIK.F	0.00124	99.8762	0
Q9CQX8	28S ribosomal protein S36, mitochondrial OS=Mus musculus GN=Mrps36 PE=1 SV=1	K.GSTSPDLLMHQGPPDTAEIIK.S	0.04564	95.6352	0
Q9CQX8	28S ribosomal protein S36, mitochondrial OS=Mus musculus GN=Mrps36 PE=1 SV=1	R.KPMSQEEMEFIQR.G	0.0087	99.1375	0
Q64433	10 kDa heat shock protein, mitochondrial OS=Mus musculus GN=Hspe1 PE=1 SV=2	R.KFLPLFDR.V	0.0028	99.7208	0
Q64433	10 kDa heat shock protein, mitochondrial OS=Mus musculus GN=Hspe1 PE=1 SV=2	K.FLPLFDR.V	0.01627	98.399	0
Q64433	10 kDa heat shock protein, mitochondrial OS=Mus musculus GN=Hspe1 PE=1 SV=2	K.GGIMLPEK.S	0.02328	97.725	0
Q64433	10 kDa heat shock protein, mitochondrial OS=Mus musculus GN=Hspe1 PE=1 SV=2	K.VLQATVVAVGSGGK.G	0.02016	98.0238	0
Q64433	10 kDa heat shock protein, mitochondrial OS=Mus musculus GN=Hspe1 PE=1 SV=2	K.SGEIEPVSVK.V	0.02696	97.3748	0
Q64433	10 kDa heat shock protein, mitochondrial OS=Mus musculus GN=Hspe1 PE=1 SV=2	K.VLLPEYGGTK.V	0.02291	97.7603	0
Q64433	10 kDa heat shock protein, mitochondrial OS=Mus musculus GN=Hspe1 PE=1 SV=2	K.VVLDDKDYFLF.R	0.01373	98.6456	0
Q64433	10 kDa heat shock protein, mitochondrial OS=Mus musculus GN=Hspe1 PE=1 SV=2	K.VVLDDKDYFLFR.D	0.00628	99.3759	0
Q64433	10 kDa heat shock protein, mitochondrial OS=Mus musculus GN=Hspe1 PE=1 SV=2	K.VVLDDKDYFLFR.D	0.00426	99.5758	0
Q64433	10 kDa heat shock protein, mitochondrial OS=Mus musculus GN=Hspe1 PE=1 SV=2	K.DYFLFR.D	0.01386	98.6329	0
P09671	Superoxide dismutase [Mn], mitochondrial OS=Mus musculus GN=Sod2 PE=1 SV=3	K.GDVTTQVALQPALK.F	0.01588	98.4368	0
P09671	Superoxide dismutase [Mn], mitochondrial OS=Mus musculus GN=Sod2 PE=1 SV=3	K.FNGGGHINHTIFWTNLSPK.G	0.00186	99.8143	0
P09671	Superoxide dismutase [Mn], mitochondrial OS=Mus musculus GN=Sod2 PE=1 SV=3	K.FNGGGHINHTIFWTNLSPK.G	0.01902	98.1335	0
P09671	Superoxide dismutase [Mn], mitochondrial OS=Mus musculus GN=Sod2 PE=1 SV=3	K.FNGGGHINHTIFWTNLSPK.G	0.0169	98.3381	0
P09671	Superoxide dismutase [Mn], mitochondrial OS=Mus musculus GN=Sod2 PE=1 SV=3	K.GELLEAIK.R	0.00977	99.0325	0
P09671	Superoxide dismutase [Mn], mitochondrial OS=Mus musculus GN=Sod2 PE=1 SV=3	G.SGWGWLGFNK.E	0.32229	75.6264	0
P09671	Superoxide dismutase [Mn], mitochondrial OS=Mus musculus GN=Sod2 PE=1 SV=3	H.AYYLQYK.N	0.00463	99.5391	0
P09671	Superoxide dismutase [Mn], mitochondrial OS=Mus musculus GN=Sod2 PE=1 SV=3	K.AIWNVINWENVTER.Y	0.01646	98.3807	0
Q9CQV1	Mitochondrial import inner membrane translocase subunit TIM16 OS=Mus musculus GN=Pam16 PE=2 SV=1	R.AGHQSAAASNLSGLSLQEAQQILNVSK.L	0.0417	95.9969	0
Q8BP92	Reticulocalbin-2 OS=Mus musculus GN=Rcn2 PE=2 SV=1	R.RDPTANEDPEWILVEK.D	0.05209	95.0489	0
Q8BP92	Reticulocalbin-2 OS=Mus musculus GN=Rcn2 PE=2 SV=1	R.DPTANEDPEWILVEK.D	0.0156	98.464	0
Q8BP92	Reticulocalbin-2 OS=Mus musculus GN=Rcn2 PE=2 SV=1	K.KLSEEEILENQDLFLTSEATDYGR.Q	0.06476	93.9179	0
Q8BP92	Reticulocalbin-2 OS=Mus musculus GN=Rcn2 PE=2 SV=1	K.LSEEEILENQDLFLTSEATDYGR.Q	0.02713	97.3587	0
Q64521	Glycerol-3-phosphate dehydrogenase, mitochondrial OS=Mus musculus GN=Gpd2 PE=1 SV=2	R.EAQLMTLK.N	0.06103	94.248	0
Q64521	Glycerol-3-phosphate dehydrogenase, mitochondrial OS=Mus musculus GN=Gpd2 PE=1 SV=2	K.TALVERDDFSSGTSSR.S	0.01985	98.0536	0
Q64521	Glycerol-3-phosphate dehydrogenase, mitochondrial OS=Mus musculus GN=Gpd2 PE=1 SV=2	K.AIMNLDVEQYR.M	0.01259	98.7567	0
Q64521	Glycerol-3-phosphate dehydrogenase, mitochondrial OS=Mus musculus GN=Gpd2 PE=1 SV=2	R.ANLLEIAPHLSAPLPIMLPLYK.W	0.02308	97.7441	0
Q64521	Glycerol-3-phosphate dehydrogenase, mitochondrial OS=Mus musculus GN=Gpd2 PE=1 SV=2	R.ANLLEIAPHLSAPLPIMLPLYK.W	0.03493	96.6249	0
Q64521	Glycerol-3-phosphate dehydrogenase, mitochondrial OS=Mus musculus GN=Gpd2 PE=1 SV=2	R.YGAATANYMEVVSLLK.K	0.04293	95.8837	0
Q64521	Glycerol-3-phosphate dehydrogenase, mitochondrial OS=Mus musculus GN=Gpd2 PE=1 SV=2	K.DVLTGQEFDVR.A	0.01736	98.2936	0
Q64521	Glycerol-3-phosphate dehydrogenase, mitochondrial OS=Mus musculus GN=Gpd2 PE=1 SV=2	R.VIFFLPWEK.M	0.0207	97.972	0
Q64521	Glycerol-3-phosphate dehydrogenase, mitochondrial OS=Mus musculus GN=Gpd2 PE=1 SV=2	R.NYLSSDVEVR.R	0.02771	97.3037	0
Q64521	Glycerol-3-phosphate dehydrogenase, mitochondrial OS=Mus musculus GN=Gpd2 PE=1 SV=2	R.SMAEDTVDAAVK.F	0.04042	96.115	0
Q64521	Glycerol-3-phosphate dehydrogenase, mitochondrial OS=Mus musculus GN=Gpd2 PE=1 SV=2	R.TVGLFLQGGK.D	0.02121	97.9231	0
Q64521	Glycerol-3-phosphate dehydrogenase, mitochondrial OS=Mus musculus GN=Gpd2 PE=1 SV=2	R.TVGLFLQGGKDWSPTLYIR.L	0.00436	99.5659	0
Q64521	Glycerol-3-phosphate dehydrogenase, mitochondrial OS=Mus musculus GN=Gpd2 PE=1 SV=2	K.DWSPTLYIR.L	0.01729	98.3004	0
Q64521	Glycerol-3-phosphate dehydrogenase, mitochondrial OS=Mus musculus GN=Gpd2 PE=1 SV=2	R.LVQDYGLESEVAQHLAK.T	0.01064	98.9472	0
Q64521	Glycerol-3-phosphate dehydrogenase, mitochondrial OS=Mus musculus GN=Gpd2 PE=1 SV=2	R.LVQDYGLESEVAQHLAK.T	0.02222	97.8263	0
Q64521	Glycerol-3-phosphate dehydrogenase, mitochondrial OS=Mus musculus GN=Gpd2 PE=1 SV=2	R.LVSEFPYIEAEVK.Y	0.03199	96.9002	0
Q64521	Glycerol-3-phosphate dehydrogenase, mitochondrial OS=Mus musculus GN=Gpd2 PE=1 SV=2	R.LAFLNVQAAEEALPR.I	0.02036	98.0046	0
Q64521	Glycerol-3-phosphate dehydrogenase, mitochondrial OS=Mus musculus GN=Gpd2 PE=1 SV=2	R.LAFLNVQAAEEALPR.I	0.02758	97.316	0
Q64521	Glycerol-3-phosphate dehydrogenase, mitochondrial OS=Mus musculus GN=Gpd2 PE=1 SV=2	R.ELNWSELR.K	0.01931	98.1056	0
Q64521	Glycerol-3-phosphate dehydrogenase, mitochondrial OS=Mus musculus GN=Gpd2 PE=1 SV=2	R.FLYYEMGYK.S	0.03386	96.7249	0
Q64521	Glycerol-3-phosphate dehydrogenase, mitochondrial OS=Mus musculus GN=Gpd2 PE=1 SV=2	R.TEQLTDSTEISLLPSDIDR.Y	0.00927	99.0815	0
Q64521	Glycerol-3-phosphate dehydrogenase, mitochondrial OS=Mus musculus GN=Gpd2 PE=1 SV=2	K.NGQVELHEFLQLMSAVQK.G	0.03067	97.0243	0
P05213	Tubulin alpha-1B chain OS=Mus musculus GN=Tuba1b PE=1 SV=2	R.AVFVDLEPTVIDEVR.T	0.01905	98.1306	0
P05213	Tubulin alpha-1B chain OS=Mus musculus GN=Tuba1b PE=1 SV=2	R.AVFVDLEPTVIDEVR.T	0.02818	97.2592	0
P05213	Tubulin alpha-1B chain OS=Mus musculus GN=Tuba1b PE=1 SV=2	R.QLFHPEQLITGK.E	0.08019	92.5763	0
P05213	Tubulin alpha-1B chain OS=Mus musculus GN=Tuba1b PE=1 SV=2	R.QLFHPEQLITGK.E	0.02032	98.0085	0
P05213	Tubulin alpha-1B chain OS=Mus musculus GN=Tuba1b PE=1 SV=2	R.QLFHPEQLITGKEDAANNYAR.G	0.05538	94.7526	0
P05213	Tubulin alpha-1B chain OS=Mus musculus GN=Tuba1b PE=1 SV=2	K.EIIDLVLDR.I	0.0284	97.2384	0
P05213	Tubulin alpha-1B chain OS=Mus musculus GN=Tuba1b PE=1 SV=2	F.GGGTGSGFTSLLMER.L	0.03382	96.7286	0
P05213	Tubulin alpha-1B chain OS=Mus musculus GN=Tuba1b PE=1 SV=2	R.NLDIERPTYTNLNR.L	0.00457	99.5451	0
P05213	Tubulin alpha-1B chain OS=Mus musculus GN=Tuba1b PE=1 SV=2	R.IHFPLATYAPVISAEK.A	0.02819	97.2583	0
P05213	Tubulin alpha-1B chain OS=Mus musculus GN=Tuba1b PE=1 SV=2	K.DVNAAIATIK.T	0.0307	97.0214	0
P05213	Tubulin alpha-1B chain OS=Mus musculus GN=Tuba1b PE=1 SV=2	K.VGINYQPPTVVPGGDLAK.V	0.0267	97.3994	0
P05213	Tubulin alpha-1B chain OS=Mus musculus GN=Tuba1b PE=1 SV=2	K.VGINYQPPTVVPGGDLAK.V	0.03709	96.4236	0
P05213	Tubulin alpha-1B chain OS=Mus musculus GN=Tuba1b PE=1 SV=2	R.LDHKFDLMYAK.R	0.00843	99.164	0
P05213	Tubulin alpha-1B chain OS=Mus musculus GN=Tuba1b PE=1 SV=2	R.LDHKFDLMYAK.R	0.00551	99.452	0
P05213	Tubulin alpha-1B chain OS=Mus musculus GN=Tuba1b PE=1 SV=2	K.FDLMYAK.R	0.02812	97.2649	0
P68369	Tubulin alpha-1A chain OS=Mus musculus GN=Tuba1a PE=1 SV=1	R.AVFVDLEPTVIDEVR.T	0.01905	98.1306	0
P68369	Tubulin alpha-1A chain OS=Mus musculus GN=Tuba1a PE=1 SV=1	R.AVFVDLEPTVIDEVR.T	0.02818	97.2592	0
P68369	Tubulin alpha-1A chain OS=Mus musculus GN=Tuba1a PE=1 SV=1	R.QLFHPEQLITGK.E	0.08019	92.5763	0
P68369	Tubulin alpha-1A chain OS=Mus musculus GN=Tuba1a PE=1 SV=1	R.QLFHPEQLITGK.E	0.02032	98.0085	0
P68369	Tubulin alpha-1A chain OS=Mus musculus GN=Tuba1a PE=1 SV=1	R.QLFHPEQLITGKEDAANNYAR.G	0.05538	94.7526	0
P68369	Tubulin alpha-1A chain OS=Mus musculus GN=Tuba1a PE=1 SV=1	K.EIIDLVLDR.I	0.0284	97.2384	0
P68369	Tubulin alpha-1A chain OS=Mus musculus GN=Tuba1a PE=1 SV=1	F.GGGTGSGFTSLLMER.L	0.03382	96.7286	0
P68369	Tubulin alpha-1A chain OS=Mus musculus GN=Tuba1a PE=1 SV=1	R.NLDIERPTYTNLNR.L	0.00457	99.5451	0
P68369	Tubulin alpha-1A chain OS=Mus musculus GN=Tuba1a PE=1 SV=1	R.IHFPLATYAPVISAEK.A	0.02819	97.2583	0
P68369	Tubulin alpha-1A chain OS=Mus musculus GN=Tuba1a PE=1 SV=1	K.DVNAAIATIK.T	0.0307	97.0214	0
P68369	Tubulin alpha-1A chain OS=Mus musculus GN=Tuba1a PE=1 SV=1	K.VGINYQPPTVVPGGDLAK.V	0.0267	97.3994	0
P68369	Tubulin alpha-1A chain OS=Mus musculus GN=Tuba1a PE=1 SV=1	K.VGINYQPPTVVPGGDLAK.V	0.03709	96.4236	0
P68369	Tubulin alpha-1A chain OS=Mus musculus GN=Tuba1a PE=1 SV=1	R.LDHKFDLMYAK.R	0.00843	99.164	0
P68369	Tubulin alpha-1A chain OS=Mus musculus GN=Tuba1a PE=1 SV=1	R.LDHKFDLMYAK.R	0.00551	99.452	0
P68369	Tubulin alpha-1A chain OS=Mus musculus GN=Tuba1a PE=1 SV=1	K.FDLMYAK.R	0.02812	97.2649	0
Q9DB20	ATP synthase subunit O, mitochondrial OS=Mus musculus GN=Atp5o PE=1 SV=1	R.YATALYSAASK.E	0.01369	98.6495	0
Q9DB20	ATP synthase subunit O, mitochondrial OS=Mus musculus GN=Atp5o PE=1 SV=1	K.VSLAVLNPYIK.R	0.01563	98.4611	0
Q9DB20	ATP synthase subunit O, mitochondrial OS=Mus musculus GN=Atp5o PE=1 SV=1	K.SLNDITKR.E	0.00605	99.3986	0
Q9DB20	ATP synthase subunit O, mitochondrial OS=Mus musculus GN=Atp5o PE=1 SV=1	R.EKFSPLTANLMNLLAENGR.L	0.01042	98.9687	0
Q9DB20	ATP synthase subunit O, mitochondrial OS=Mus musculus GN=Atp5o PE=1 SV=1	K.FSPLTANLMNLLAENGR.L	0.02668	97.4013	0
Q9DB20	ATP synthase subunit O, mitochondrial OS=Mus musculus GN=Atp5o PE=1 SV=1	K.FSPLTANLMNLLAENGR.L	0.00934	99.0746	0
Q9DB20	ATP synthase subunit O, mitochondrial OS=Mus musculus GN=Atp5o PE=1 SV=1	R.LGNTQGIISAFSTIMSVHR.G	0.02921	97.1619	0
Q9DB20	ATP synthase subunit O, mitochondrial OS=Mus musculus GN=Atp5o PE=1 SV=1	R.LGNTQGIISAFSTIMSVHR.G	0.01568	98.4562	0
Q9DB20	ATP synthase subunit O, mitochondrial OS=Mus musculus GN=Atp5o PE=1 SV=1	K.SFLSPNQILK.L	0.01297	98.7196	0
Q9DB20	ATP synthase subunit O, mitochondrial OS=Mus musculus GN=Atp5o PE=1 SV=1	K.TDPSIMGGMIVR.I	0.01552	98.4717	0
Q8BWT1	3-ketoacyl-CoA thiolase, mitochondrial OS=Mus musculus GN=Acaa2 PE=1 SV=3	R.TPFGAYGGLLK.D	0.01665	98.3623	0
Q8BWT1	3-ketoacyl-CoA thiolase, mitochondrial OS=Mus musculus GN=Acaa2 PE=1 SV=3	K.DFSATDLTEFAAR.A	0.01336	98.6816	0
Q8BWT1	3-ketoacyl-CoA thiolase, mitochondrial OS=Mus musculus GN=Acaa2 PE=1 SV=3	R.VGVPTETGALTLNR.L	0.01925	98.1114	0
Q8BWT1	3-ketoacyl-CoA thiolase, mitochondrial OS=Mus musculus GN=Acaa2 PE=1 SV=3	L.KLEDTLWAGLTDQHVK.L	0.02752	97.3217	0
Q8BWT1	3-ketoacyl-CoA thiolase, mitochondrial OS=Mus musculus GN=Acaa2 PE=1 SV=3	K.LEDTLWAGLTDQHVK.L	0.02937	97.1468	0
Q8BWT1	3-ketoacyl-CoA thiolase, mitochondrial OS=Mus musculus GN=Acaa2 PE=1 SV=3	K.AANEAGYFNEEMAPIEVK.T	0.03003	97.0846	0
Q8BWT1	3-ketoacyl-CoA thiolase, mitochondrial OS=Mus musculus GN=Acaa2 PE=1 SV=3	K.QTMQVDEHARPQTTLEQLQK.L	0.01625	98.401	0
Q8BWT1	3-ketoacyl-CoA thiolase, mitochondrial OS=Mus musculus GN=Acaa2 PE=1 SV=3	R.PQTTLEQLQK.L	0.07913	92.6672	0
Q8BWT1	3-ketoacyl-CoA thiolase, mitochondrial OS=Mus musculus GN=Acaa2 PE=1 SV=3	K.DGTVTAGNASGVSDGAGAVIIASEDAVK.K	0.00204	99.7964	0
Q8BWT1	3-ketoacyl-CoA thiolase, mitochondrial OS=Mus musculus GN=Acaa2 PE=1 SV=3	K.DGTVTAGNASGVSDGAGAVIIASEDAVK.K	0.00881	99.1267	0
Q8BWT1	3-ketoacyl-CoA thiolase, mitochondrial OS=Mus musculus GN=Acaa2 PE=1 SV=3	K.HNFTPLAR.V	0.06581	93.8254	0
Q8BWT1	3-ketoacyl-CoA thiolase, mitochondrial OS=Mus musculus GN=Acaa2 PE=1 SV=3	K.DMDLIDVNEAFAPQFLSVQK.A	0.04088	96.0726	0
Q8BWT1	3-ketoacyl-CoA thiolase, mitochondrial OS=Mus musculus GN=Acaa2 PE=1 SV=3	K.DMDLIDVNEAFAPQFLSVQK.A	0.05024	95.2163	0
Q8BWT1	3-ketoacyl-CoA thiolase, mitochondrial OS=Mus musculus GN=Acaa2 PE=1 SV=3	K.ALDLDPSKTNVSGGAIALGHPLGGSGSR.I	0.00074	99.9261	0
Q8BWT1	3-ketoacyl-CoA thiolase, mitochondrial OS=Mus musculus GN=Acaa2 PE=1 SV=3	K.ALDLDPSKTNVSGGAIALGHPLGGSGSR.I	0.00519	99.4837	0
Q8BWT1	3-ketoacyl-CoA thiolase, mitochondrial OS=Mus musculus GN=Acaa2 PE=1 SV=3	K.TNVSGGAIALGHPLGGSGSR.I	0.0125	98.7654	0
Q8BWT1	3-ketoacyl-CoA thiolase, mitochondrial OS=Mus musculus GN=Acaa2 PE=1 SV=3	K.TNVSGGAIALGHPLGGSGSR.I	0.01327	98.6904	0
Q8BWT1	3-ketoacyl-CoA thiolase, mitochondrial OS=Mus musculus GN=Acaa2 PE=1 SV=3	R.ITAHLVHELR.R	0.00707	99.298	0
Q8BWT1	3-ketoacyl-CoA thiolase, mitochondrial OS=Mus musculus GN=Acaa2 PE=1 SV=3	R.ITAHLVHELR.R	0.00075	99.9251	0
P23927	Alpha-crystallin B chain OS=Mus musculus GN=Cryab PE=1 SV=2	R.APSWIDTGLSEMR.L	0.0212	97.924	0
P20029	78 kDa glucose-regulated protein OS=Mus musculus GN=Hspa5 PE=1 SV=3	R.ITPSYVAFTPEGER.L	0.0113	98.8826	0
P20029	78 kDa glucose-regulated protein OS=Mus musculus GN=Hspa5 PE=1 SV=3	R.ITPSYVAFTPEGER.L	0.01153	98.8601	0
P20029	78 kDa glucose-regulated protein OS=Mus musculus GN=Hspa5 PE=1 SV=3	K.NQLTSNPENTVFDAK.R	0.01011	98.9991	0
P20029	78 kDa glucose-regulated protein OS=Mus musculus GN=Hspa5 PE=1 SV=3	K.NQLTSNPENTVFDAKR.L	0.03247	96.8551	0
P20029	78 kDa glucose-regulated protein OS=Mus musculus GN=Hspa5 PE=1 SV=3	K.NQLTSNPENTVFDAKR.L	0.03196	96.903	0
P20029	78 kDa glucose-regulated protein OS=Mus musculus GN=Hspa5 PE=1 SV=3	R.TWNDPSVQQDIK.F	0.00948	99.0609	0
P20029	78 kDa glucose-regulated protein OS=Mus musculus GN=Hspa5 PE=1 SV=3	K.VTHAVVTVPAYFNDAQR.Q	0.00308	99.6929	0
P20029	78 kDa glucose-regulated protein OS=Mus musculus GN=Hspa5 PE=1 SV=3	K.VTHAVVTVPAYFNDAQR.Q	0.01396	98.6232	0
P20029	78 kDa glucose-regulated protein OS=Mus musculus GN=Hspa5 PE=1 SV=3	K.DAGTIAGLNVMR.I	0.02262	97.788	0
P20029	78 kDa glucose-regulated protein OS=Mus musculus GN=Hspa5 PE=1 SV=3	R.IINEPTAAAIAYGLDKR.E	0.01932	98.1046	0
P20029	78 kDa glucose-regulated protein OS=Mus musculus GN=Hspa5 PE=1 SV=3	L.TIDNGVFEVVATNGDTHLGGEDFDQR.V	0.01023	98.9874	0
P20029	78 kDa glucose-regulated protein OS=Mus musculus GN=Hspa5 PE=1 SV=3	R.AKFEELNMDLFR.S	0.00371	99.6304	0
P20029	78 kDa glucose-regulated protein OS=Mus musculus GN=Hspa5 PE=1 SV=3	R.AKFEELNMDLFR.S	0.02648	97.4203	0
P20029	78 kDa glucose-regulated protein OS=Mus musculus GN=Hspa5 PE=1 SV=3	K.FEELNMDLFR.S	0.00934	99.0746	0
P20029	78 kDa glucose-regulated protein OS=Mus musculus GN=Hspa5 PE=1 SV=3	K.VLEDSDLK.K	0.00959	99.0501	0
P20029	78 kDa glucose-regulated protein OS=Mus musculus GN=Hspa5 PE=1 SV=3	K.KSDIDEIVLVGGSTR.I	0.00418	99.5837	0
P20029	78 kDa glucose-regulated protein OS=Mus musculus GN=Hspa5 PE=1 SV=3	K.SDIDEIVLVGGSTR.I	0.01921	98.1152	0
P20029	78 kDa glucose-regulated protein OS=Mus musculus GN=Hspa5 PE=1 SV=3	K.SDIDEIVLVGGSTR.I	0.01287	98.7294	0
P20029	78 kDa glucose-regulated protein OS=Mus musculus GN=Hspa5 PE=1 SV=3	K.EFFNGKEPSR.G	0.00277	99.7238	0
P20029	78 kDa glucose-regulated protein OS=Mus musculus GN=Hspa5 PE=1 SV=3	L.GIETVGGVMTK.L	0.05147	95.1049	0
P20029	78 kDa glucose-regulated protein OS=Mus musculus GN=Hspa5 PE=1 SV=3	K.KSQIFSTASDNQPTVTIK.V	0.00798	99.2083	0
P20029	78 kDa glucose-regulated protein OS=Mus musculus GN=Hspa5 PE=1 SV=3	K.SQIFSTASDNQPTVTIK.V	0.01172	98.8416	0
P20029	78 kDa glucose-regulated protein OS=Mus musculus GN=Hspa5 PE=1 SV=3	K.SQIFSTASDNQPTVTIK.V	0.01598	98.4271	0
P20029	78 kDa glucose-regulated protein OS=Mus musculus GN=Hspa5 PE=1 SV=3	K.VYEGERPLTK.D	0.0018	99.8203	0
P20029	78 kDa glucose-regulated protein OS=Mus musculus GN=Hspa5 PE=1 SV=3	K.VYEGERPLTK.D	0.00033	99.967	0
P20029	78 kDa glucose-regulated protein OS=Mus musculus GN=Hspa5 PE=1 SV=3	K.ITITNDQNR.L	0.0098	99.0295	0
P20029	78 kDa glucose-regulated protein OS=Mus musculus GN=Hspa5 PE=1 SV=3	R.LTPEEIER.M	0.02484	97.5762	0
P20029	78 kDa glucose-regulated protein OS=Mus musculus GN=Hspa5 PE=1 SV=3	R.IDTRNELESYAYSLK.N	0.04533	95.6636	0
P20029	78 kDa glucose-regulated protein OS=Mus musculus GN=Hspa5 PE=1 SV=3	R.NELESYAYSLK.N	0.01337	98.6806	0
P20029	78 kDa glucose-regulated protein OS=Mus musculus GN=Hspa5 PE=1 SV=3	K.IEWLESHQDADIEDFK.A	0.01279	98.7372	0
P20029	78 kDa glucose-regulated protein OS=Mus musculus GN=Hspa5 PE=1 SV=3	K.IEWLESHQDADIEDFK.A	0.01205	98.8093	0
P20029	78 kDa glucose-regulated protein OS=Mus musculus GN=Hspa5 PE=1 SV=3	K.IEWLESHQDADIEDFKAK.K	0.0068	99.3246	0
P20029	78 kDa glucose-regulated protein OS=Mus musculus GN=Hspa5 PE=1 SV=3	K.IEWLESHQDADIEDFKAK.K	0.00347	99.6542	0
P20029	78 kDa glucose-regulated protein OS=Mus musculus GN=Hspa5 PE=1 SV=3	K.ELEEIVQPIISK.L	0.03265	96.8382	0
P20029	78 kDa glucose-regulated protein OS=Mus musculus GN=Hspa5 PE=1 SV=3	K.LYGSGGPPPTGEEDTSEKDEL.-	0.00887	99.1208	0
P12787	Cytochrome c oxidase subunit 5A, mitochondrial OS=Mus musculus GN=Cox5a PE=1 SV=2	R.WVTYFNKPDIDAWELR.K	0.00312	99.689	0
P12787	Cytochrome c oxidase subunit 5A, mitochondrial OS=Mus musculus GN=Cox5a PE=1 SV=2	R.KGMNTLVGYDLVPEPK.I	0.02623	97.444	0
P12787	Cytochrome c oxidase subunit 5A, mitochondrial OS=Mus musculus GN=Cox5a PE=1 SV=2	K.GMNTLVGYDLVPEPK.I	0.01692	98.3362	0
P12787	Cytochrome c oxidase subunit 5A, mitochondrial OS=Mus musculus GN=Cox5a PE=1 SV=2	K.GMNTLVGYDLVPEPK.I	0.0042	99.5818	0
P12787	Cytochrome c oxidase subunit 5A, mitochondrial OS=Mus musculus GN=Cox5a PE=1 SV=2	R.RLNDFASAVR.I	0.00718	99.2871	0
P12787	Cytochrome c oxidase subunit 5A, mitochondrial OS=Mus musculus GN=Cox5a PE=1 SV=2	R.LNDFASAVR.I	0.01368	98.6505	0
P12787	Cytochrome c oxidase subunit 5A, mitochondrial OS=Mus musculus GN=Cox5a PE=1 SV=2	R.ILEVVKDK.A	0.00231	99.7695	0
P12787	Cytochrome c oxidase subunit 5A, mitochondrial OS=Mus musculus GN=Cox5a PE=1 SV=2	K.AGPHKEIYPYVIQELRPTLNELGISTPEELGLDKV.-	0.013	98.7167	0
P12787	Cytochrome c oxidase subunit 5A, mitochondrial OS=Mus musculus GN=Cox5a PE=1 SV=2	K.EIYPYVIQELRPTLNELGISTPEELGLDKV.-	0.00579	99.4243	0
P12787	Cytochrome c oxidase subunit 5A, mitochondrial OS=Mus musculus GN=Cox5a PE=1 SV=2	Y.VIQELRPTLNELGISTPEELGLDKV.-	0.00263	99.7377	0
P12787	Cytochrome c oxidase subunit 5A, mitochondrial OS=Mus musculus GN=Cox5a PE=1 SV=2	Y.VIQELRPTLNELGISTPEELGLDKV.-	0.02978	97.1081	0
P12787	Cytochrome c oxidase subunit 5A, mitochondrial OS=Mus musculus GN=Cox5a PE=1 SV=2	L.RPTLNELGISTPEELGLDKV.-	0.02515	97.5467	0
P07356	Annexin A2 OS=Mus musculus GN=Anxa2 PE=1 SV=2	K.LSLEGDHSTPPSAYGSVK.P	0.02022	98.0181	0
P07356	Annexin A2 OS=Mus musculus GN=Anxa2 PE=1 SV=2	K.LSLEGDHSTPPSAYGSVKPY.T	0.00063	99.937	0
P07356	Annexin A2 OS=Mus musculus GN=Anxa2 PE=1 SV=2	K.LSLEGDHSTPPSAYGSVKPY.T	0.0113	98.8826	0
P07356	Annexin A2 OS=Mus musculus GN=Anxa2 PE=1 SV=2	K.LSLEGDHSTPPSAYGSVKPYTNFDAER.D	0.00513	99.4896	0
P07356	Annexin A2 OS=Mus musculus GN=Anxa2 PE=1 SV=2	K.LSLEGDHSTPPSAYGSVKPYTNFDAER.D	0.09973	90.9314	0
P07356	Annexin A2 OS=Mus musculus GN=Anxa2 PE=1 SV=2	L.SLEGDHSTPPSAYGSVKPYTNFDAER.D	0.00087	99.9131	0
P07356	Annexin A2 OS=Mus musculus GN=Anxa2 PE=1 SV=2	R.DALNIETAVK.T	0.01598	98.4271	0
P07356	Annexin A2 OS=Mus musculus GN=Anxa2 PE=1 SV=2	K.TKGVDEVTIVNILTNR.S	0.00477	99.5253	0
P07356	Annexin A2 OS=Mus musculus GN=Anxa2 PE=1 SV=2	K.GVDEVTIVNILTNR.S	0.03204	96.8955	0
P07356	Annexin A2 OS=Mus musculus GN=Anxa2 PE=1 SV=2	K.GVDEVTIVNILTNR.S	0.01608	98.4174	0
P07356	Annexin A2 OS=Mus musculus GN=Anxa2 PE=1 SV=2	R.QDIAFAYQR.R	0.01157	98.8562	0
P07356	Annexin A2 OS=Mus musculus GN=Anxa2 PE=1 SV=2	R.TNQELQEINR.V	0.03393	96.7183	0
P07356	Annexin A2 OS=Mus musculus GN=Anxa2 PE=1 SV=2	K.TDLEKDIISDTSGDFR.K	0.00617	99.3868	0
P07356	Annexin A2 OS=Mus musculus GN=Anxa2 PE=1 SV=2	K.TDLEKDIISDTSGDFRK.L	0.00362	99.6393	0
P07356	Annexin A2 OS=Mus musculus GN=Anxa2 PE=1 SV=2	K.DIISDTSGDFR.K	0.01115	98.8973	0
P07356	Annexin A2 OS=Mus musculus GN=Anxa2 PE=1 SV=2	K.DIISDTSGDFRK.L	0.05763	94.551	0
P07356	Annexin A2 OS=Mus musculus GN=Anxa2 PE=1 SV=2	R.RAEDGSVIDYELIDQDAR.E	0.00638	99.366	0
P07356	Annexin A2 OS=Mus musculus GN=Anxa2 PE=1 SV=2	R.AEDGSVIDYELIDQDAR.E	0.01354	98.6641	0
P07356	Annexin A2 OS=Mus musculus GN=Anxa2 PE=1 SV=2	K.WISIMTER.S	0.02029	98.0113	0
P07356	Annexin A2 OS=Mus musculus GN=Anxa2 PE=1 SV=2	R.YKSYSPYDMLESIKK.E	0.03037	97.0525	0
P07356	Annexin A2 OS=Mus musculus GN=Anxa2 PE=1 SV=2	K.SYSPYDMLESIK.K	0.01529	98.494	0
P07356	Annexin A2 OS=Mus musculus GN=Anxa2 PE=1 SV=2	K.SYSPYDMLESIKK.E	0.00293	99.7079	0
P07356	Annexin A2 OS=Mus musculus GN=Anxa2 PE=1 SV=2	K.SYSPYDMLESIKK.E	0.00172	99.8283	0
P07356	Annexin A2 OS=Mus musculus GN=Anxa2 PE=1 SV=2	R.SEVDMLK.I	0.01314	98.703	0
P07356	Annexin A2 OS=Mus musculus GN=Anxa2 PE=1 SV=2	K.SLYYYIQQDTK.G	0.01401	98.6184	0
P07356	Annexin A2 OS=Mus musculus GN=Anxa2 PE=1 SV=2	K.SLYYYIQQDTKGDYQK.A	0.00608	99.3957	0
Q9ERD7	Tubulin beta-3 chain OS=Mus musculus GN=Tubb3 PE=1 SV=1	K.FWEVISDEHGIDPSGNYVGDSDLQLER.I	0.02233	97.8158	0
Q9ERD7	Tubulin beta-3 chain OS=Mus musculus GN=Tubb3 PE=1 SV=1	R.ISVYYNEASSHK.Y	0.0229	97.7613	0
Q9ERD7	Tubulin beta-3 chain OS=Mus musculus GN=Tubb3 PE=1 SV=1	R.ISVYYNEASSHK.Y	0.02421	97.6362	0
Q9ERD7	Tubulin beta-3 chain OS=Mus musculus GN=Tubb3 PE=1 SV=1	R.AILVDLEPGTMDSVR.S	0.0166	98.3671	0
Q9ERD7	Tubulin beta-3 chain OS=Mus musculus GN=Tubb3 PE=1 SV=1	R.AILVDLEPGTMDSVR.S	0.06085	94.264	0
Q9ERD7	Tubulin beta-3 chain OS=Mus musculus GN=Tubb3 PE=1 SV=1	R.SGAFGHLFRPDNFIFGQSGAGNNWAK.G	0.01973	98.0652	0
Q9ERD7	Tubulin beta-3 chain OS=Mus musculus GN=Tubb3 PE=1 SV=1	R.SGAFGHLFRPDNFIFGQSGAGNNWAK.G	0.01604	98.4213	0
Q9ERD7	Tubulin beta-3 chain OS=Mus musculus GN=Tubb3 PE=1 SV=1	A.KGHYTEGAELVDSVLDVVR.K	0.00934	99.0746	0
Q9ERD7	Tubulin beta-3 chain OS=Mus musculus GN=Tubb3 PE=1 SV=1	K.GHYTEGAELVDSVLDVVR.K	0.03349	96.7595	0
Q9ERD7	Tubulin beta-3 chain OS=Mus musculus GN=Tubb3 PE=1 SV=1	R.IMNTFSVVPSPK.V	0.04671	95.5374	0
Q9ERD7	Tubulin beta-3 chain OS=Mus musculus GN=Tubb3 PE=1 SV=1	R.KLAVNMVPFPR.L	0.00234	99.7665	0
Q9ERD7	Tubulin beta-3 chain OS=Mus musculus GN=Tubb3 PE=1 SV=1	K.LAVNMVPFPR.L	0.02546	97.5172	0
Q9ERD7	Tubulin beta-3 chain OS=Mus musculus GN=Tubb3 PE=1 SV=1	R.LHFFMPGFAPLTAR.G	0.01221	98.7937	0
Q9ERD7	Tubulin beta-3 chain OS=Mus musculus GN=Tubb3 PE=1 SV=1	R.LHFFMPGFAPLTAR.G	0.01575	98.4494	0
Q9ERD7	Tubulin beta-3 chain OS=Mus musculus GN=Tubb3 PE=1 SV=1	R.ALTVPELTQQMFDAK.N	0.02648	97.4203	0
Q9ERD7	Tubulin beta-3 chain OS=Mus musculus GN=Tubb3 PE=1 SV=1	R.ALTVPELTQQMFDAK.N	0.02152	97.8933	0
Q9ERD7	Tubulin beta-3 chain OS=Mus musculus GN=Tubb3 PE=1 SV=1	K.EVDEQMLAIQSK.N	0.02239	97.81	0
Q9ERD7	Tubulin beta-3 chain OS=Mus musculus GN=Tubb3 PE=1 SV=1	K.NSSYFVEWIPNNVK.V	0.02704	97.3672	0
Q9ERD7	Tubulin beta-3 chain OS=Mus musculus GN=Tubb3 PE=1 SV=1	K.NSSYFVEWIPNNVK.V	0.01088	98.9237	0
Q9ERD7	Tubulin beta-3 chain OS=Mus musculus GN=Tubb3 PE=1 SV=1	N.SSYFVEWIPNNVK.V	0.11166	89.9556	0
Q9ERD7	Tubulin beta-3 chain OS=Mus musculus GN=Tubb3 PE=1 SV=1	K.MSSTFIGNSTAIQELFKR.I	0.01641	98.3855	0
Q9ERD7	Tubulin beta-3 chain OS=Mus musculus GN=Tubb3 PE=1 SV=1	R.ISEQFTAMFR.R	0.0224	97.8091	0
Q9CR68	Cytochrome b-c1 complex subunit Rieske, mitochondrial OS=Mus musculus GN=Uqcrfs1 PE=1 SV=1	R.GVAGALRPLLQGAVPAASEPPVLDVK.R	0.00489	99.5134	0
Q9CR68	Cytochrome b-c1 complex subunit Rieske, mitochondrial OS=Mus musculus GN=Uqcrfs1 PE=1 SV=1	R.GVAGALRPLLQGAVPAASEPPVLDVK.R	0.0057	99.4332	0
Q9CR68	Cytochrome b-c1 complex subunit Rieske, mitochondrial OS=Mus musculus GN=Uqcrfs1 PE=1 SV=1	R.ESLSGQAAARPLVATV.G	0.01198	98.8162	0
Q9CR68	Cytochrome b-c1 complex subunit Rieske, mitochondrial OS=Mus musculus GN=Uqcrfs1 PE=1 SV=1	R.PLVATVGLNVPASVR.F	0.00858	99.1493	0
Q9CR68	Cytochrome b-c1 complex subunit Rieske, mitochondrial OS=Mus musculus GN=Uqcrfs1 PE=1 SV=1	K.VPDFSDYR.R	0.01369	98.6495	0
Q9CR68	Cytochrome b-c1 complex subunit Rieske, mitochondrial OS=Mus musculus GN=Uqcrfs1 PE=1 SV=1	K.EIDQEAAVEVSQLR.D	0.05829	94.4921	0
Q9CR68	Cytochrome b-c1 complex subunit Rieske, mitochondrial OS=Mus musculus GN=Uqcrfs1 PE=1 SV=1	K.EIDQEAAVEVSQLR.D	0.01336	98.6816	0
Q9CR68	Cytochrome b-c1 complex subunit Rieske, mitochondrial OS=Mus musculus GN=Uqcrfs1 PE=1 SV=1	K.EIDQEAAVEVSQLRDPQHDLDR.V	0.00987	99.0226	0
Q99KI0	Aconitate hydratase, mitochondrial OS=Mus musculus GN=Aco2 PE=1 SV=1	K.VAMSHFEPSEYIR.Y	0.01555	98.4688	0
Q99KI0	Aconitate hydratase, mitochondrial OS=Mus musculus GN=Aco2 PE=1 SV=1	K.VAMSHFEPSEYIR.Y	0.02545	97.5182	0
Q99KI0	Aconitate hydratase, mitochondrial OS=Mus musculus GN=Aco2 PE=1 SV=1	K.IVYGHLDDPANQEIER.G	0.00772	99.2339	0
Q99KI0	Aconitate hydratase, mitochondrial OS=Mus musculus GN=Aco2 PE=1 SV=1	K.IVYGHLDDPANQEIER.G	0.025	97.561	0
Q99KI0	Aconitate hydratase, mitochondrial OS=Mus musculus GN=Aco2 PE=1 SV=1	R.AKDINQEVYNFLATAGAK.Y	0.03164	96.933	0
Q99KI0	Aconitate hydratase, mitochondrial OS=Mus musculus GN=Aco2 PE=1 SV=1	R.AKDINQEVYNFLATAGAK.Y	0.00298	99.7029	0
Q99KI0	Aconitate hydratase, mitochondrial OS=Mus musculus GN=Aco2 PE=1 SV=1	K.YGVGFWRPGSGIIHQI.I	0.02063	97.9787	0
Q99KI0	Aconitate hydratase, mitochondrial OS=Mus musculus GN=Aco2 PE=1 SV=1	K.YGVGFWRPGSGIIHQIILENY.A	0.02725	97.3473	0
Q99KI0	Aconitate hydratase, mitochondrial OS=Mus musculus GN=Aco2 PE=1 SV=1	K.LTGSLSGWTSPK.D	0.05392	94.8839	0
Q99KI0	Aconitate hydratase, mitochondrial OS=Mus musculus GN=Aco2 PE=1 SV=1	K.VAGILTVK.G	0.01065	98.9462	0
Q99KI0	Aconitate hydratase, mitochondrial OS=Mus musculus GN=Aco2 PE=1 SV=1	L.KPHINGPFTPDLAHPVADVGTVAEK.E	0.04434	95.7543	0
Q99KI0	Aconitate hydratase, mitochondrial OS=Mus musculus GN=Aco2 PE=1 SV=1	H.INGPFTPDLAHPVADVGTVAEK.E	0.01324	98.6933	0
Q99KI0	Aconitate hydratase, mitochondrial OS=Mus musculus GN=Aco2 PE=1 SV=1	K.EGWPLDIR.V	0.01534	98.4892	0
Q99KI0	Aconitate hydratase, mitochondrial OS=Mus musculus GN=Aco2 PE=1 SV=1	K.QALAHGLK.C	0.01153	98.8601	0
Q99KI0	Aconitate hydratase, mitochondrial OS=Mus musculus GN=Aco2 PE=1 SV=1	K.SQFTITPGSEQIR.A	0.02984	97.1025	0
Q99KI0	Aconitate hydratase, mitochondrial OS=Mus musculus GN=Aco2 PE=1 SV=1	R.DGYAQILR.D	0.01055	98.956	0
Q99KI0	Aconitate hydratase, mitochondrial OS=Mus musculus GN=Aco2 PE=1 SV=1	K.NTIVTSYNR.N	0.02755	97.3189	0
Q99KI0	Aconitate hydratase, mitochondrial OS=Mus musculus GN=Aco2 PE=1 SV=1	H.AFVTSPEIVTALAIAGTLK.F	0.00383	99.6185	0
Q99KI0	Aconitate hydratase, mitochondrial OS=Mus musculus GN=Aco2 PE=1 SV=1	K.FNPETDFLTGK.D	0.05266	94.9974	0
Q99KI0	Aconitate hydratase, mitochondrial OS=Mus musculus GN=Aco2 PE=1 SV=1	K.FKLEAPDADELPR.S	0.00842	99.165	0
Q99KI0	Aconitate hydratase, mitochondrial OS=Mus musculus GN=Aco2 PE=1 SV=1	K.FKLEAPDADELPR.S	0.00857	99.1503	0
Q99KI0	Aconitate hydratase, mitochondrial OS=Mus musculus GN=Aco2 PE=1 SV=1	K.LEAPDADELPR.S	0.01227	98.7879	0
Q99KI0	Aconitate hydratase, mitochondrial OS=Mus musculus GN=Aco2 PE=1 SV=1	R.SDFDPGQDTYQHPPK.D	0.02381	97.6744	0
Q99KI0	Aconitate hydratase, mitochondrial OS=Mus musculus GN=Aco2 PE=1 SV=1	R.SDFDPGQDTYQHPPK.D	0.01343	98.6748	0
Q99KI0	Aconitate hydratase, mitochondrial OS=Mus musculus GN=Aco2 PE=1 SV=1	R.LQLLEPFDK.W	0.01348	98.6699	0
Q99KI0	Aconitate hydratase, mitochondrial OS=Mus musculus GN=Aco2 PE=1 SV=1	K.DLEDLQILIK.V	0.0191	98.1258	0
Q99KI0	Aconitate hydratase, mitochondrial OS=Mus musculus GN=Aco2 PE=1 SV=1	K.FRGHLDNISNNLLIGAINIENGK.A	0.01841	98.1923	0
Q99KI0	Aconitate hydratase, mitochondrial OS=Mus musculus GN=Aco2 PE=1 SV=1	L.LIGAINIENGK.A	0.00786	99.2201	0
Q99KI0	Aconitate hydratase, mitochondrial OS=Mus musculus GN=Aco2 PE=1 SV=1	R.NAVTQEFGPVPDTAR.Y	0.01075	98.9364	0
Q99KI0	Aconitate hydratase, mitochondrial OS=Mus musculus GN=Aco2 PE=1 SV=1	R.WVVIGDENYGEGSSR.E	0.00825	99.1818	0
Q99KI0	Aconitate hydratase, mitochondrial OS=Mus musculus GN=Aco2 PE=1 SV=1	K.QGLLPLTFADPSDYNK.I	0.01695	98.3333	0
Q99KI0	Aconitate hydratase, mitochondrial OS=Mus musculus GN=Aco2 PE=1 SV=1	K.IHPVDKLTIQGLK.D	0.00192	99.8084	0
Q99KI0	Aconitate hydratase, mitochondrial OS=Mus musculus GN=Aco2 PE=1 SV=1	K.DFAPGKPLK.C	0.00035	99.965	0
Q99KI0	Aconitate hydratase, mitochondrial OS=Mus musculus GN=Aco2 PE=1 SV=1	K.HPNGTQETILLNHTFNETQIEWFR.A	0.06919	93.5287	0
Q99KI0	Aconitate hydratase, mitochondrial OS=Mus musculus GN=Aco2 PE=1 SV=1	L.NHTFNETQIEWFR.A	0.01231	98.784	0
Q05186	Reticulocalbin-1 OS=Mus musculus GN=Rcn1 PE=1 SV=1	K.TFDQLSPDESK.E	0.00901	99.107	0
Q05186	Reticulocalbin-1 OS=Mus musculus GN=Rcn1 PE=1 SV=1	K.TFDQLSPDESKER.L	0.10826	90.2315	0
Q05186	Reticulocalbin-1 OS=Mus musculus GN=Rcn1 PE=1 SV=1	K.TFDQLSPDESKER.L	0.00584	99.4194	0
Q05186	Reticulocalbin-1 OS=Mus musculus GN=Rcn1 PE=1 SV=1	K.IVDRIDSDGDGLVTTEELK.L	0.01095	98.9169	0
Q05186	Reticulocalbin-1 OS=Mus musculus GN=Rcn1 PE=1 SV=1	K.ISWEEYK.Q	0.02079	97.9633	0
Q05186	Reticulocalbin-1 OS=Mus musculus GN=Rcn1 PE=1 SV=1	R.EEFTAFLHPEEFEHMK.E	0.00397	99.6046	0
Q05186	Reticulocalbin-1 OS=Mus musculus GN=Rcn1 PE=1 SV=1	K.EIVVLETLEDIDK.N	0.01104	98.9081	0
Q05186	Reticulocalbin-1 OS=Mus musculus GN=Rcn1 PE=1 SV=1	K.EEILDNWNMFVGSQATNYGEDLTK.N	0.00642	99.3621	0
Q922F4	Tubulin beta-6 chain OS=Mus musculus GN=Tubb6 PE=1 SV=1	K.FWEVISDEHGIDQAGGYVGDSALQLER.I	0.00295	99.7059	0
Q922F4	Tubulin beta-6 chain OS=Mus musculus GN=Tubb6 PE=1 SV=1	R.SGPFGQLFRPDNFIFGQTGAGNNWAK.G	0.07787	92.7756	0
Q922F4	Tubulin beta-6 chain OS=Mus musculus GN=Tubb6 PE=1 SV=1	R.SGPFGQLFRPDNFIFGQTGAGNNWAK.G	0.01394	98.6252	0
Q922F4	Tubulin beta-6 chain OS=Mus musculus GN=Tubb6 PE=1 SV=1	A.KGHYTEGAELVDSVLDVVR.K	0.00934	99.0746	0
Q922F4	Tubulin beta-6 chain OS=Mus musculus GN=Tubb6 PE=1 SV=1	K.GHYTEGAELVDSVLDVVR.K	0.03349	96.7595	0
Q922F4	Tubulin beta-6 chain OS=Mus musculus GN=Tubb6 PE=1 SV=1	K.LTTPTYGDLNHLVSATMSGVTTSLR.F	0.01844	98.1894	0
Q922F4	Tubulin beta-6 chain OS=Mus musculus GN=Tubb6 PE=1 SV=1	R.KLAVNMVPFPR.L	0.00234	99.7665	0
Q922F4	Tubulin beta-6 chain OS=Mus musculus GN=Tubb6 PE=1 SV=1	K.LAVNMVPFPR.L	0.02546	97.5172	0
Q922F4	Tubulin beta-6 chain OS=Mus musculus GN=Tubb6 PE=1 SV=1	R.LHFFMPGFAPLTAR.G	0.01221	98.7937	0
Q922F4	Tubulin beta-6 chain OS=Mus musculus GN=Tubb6 PE=1 SV=1	R.LHFFMPGFAPLTAR.G	0.01575	98.4494	0
Q922F4	Tubulin beta-6 chain OS=Mus musculus GN=Tubb6 PE=1 SV=1	R.ALTVPELTQQMFDAK.N	0.02648	97.4203	0
Q922F4	Tubulin beta-6 chain OS=Mus musculus GN=Tubb6 PE=1 SV=1	R.ALTVPELTQQMFDAK.N	0.02152	97.8933	0
Q922F4	Tubulin beta-6 chain OS=Mus musculus GN=Tubb6 PE=1 SV=1	K.NSSYFVEWIPNNVK.V	0.02704	97.3672	0
Q922F4	Tubulin beta-6 chain OS=Mus musculus GN=Tubb6 PE=1 SV=1	K.NSSYFVEWIPNNVK.V	0.01088	98.9237	0
Q922F4	Tubulin beta-6 chain OS=Mus musculus GN=Tubb6 PE=1 SV=1	N.SSYFVEWIPNNVK.V	0.11166	89.9556	0
Q922F4	Tubulin beta-6 chain OS=Mus musculus GN=Tubb6 PE=1 SV=1	K.MASTFIGNSTAIQELFK.R	0.06049	94.296	0
Q922F4	Tubulin beta-6 chain OS=Mus musculus GN=Tubb6 PE=1 SV=1	K.MASTFIGNSTAIQELFKR.I	0.00955	99.054	0
Q9CQ69	Cytochrome b-c1 complex subunit 8 OS=Mus musculus GN=Uqcrq PE=1 SV=3	R.HVISYSLSPFEQR.A	0.02296	97.7555	0
Q9CQ69	Cytochrome b-c1 complex subunit 8 OS=Mus musculus GN=Uqcrq PE=1 SV=3	R.HVISYSLSPFEQR.A	0.0235	97.704	0
Q9CQ69	Cytochrome b-c1 complex subunit 8 OS=Mus musculus GN=Uqcrq PE=1 SV=3	R.AFPSYFSK.G	0.01574	98.4504	0
Q9DCN2	NADH-cytochrome b5 reductase 3 OS=Mus musculus GN=Cyb5r3 PE=1 SV=3	R.STPAITLENPDIK.Y	0.01313	98.704	0
Q9DCN2	NADH-cytochrome b5 reductase 3 OS=Mus musculus GN=Cyb5r3 PE=1 SV=3	R.STPAITLENPDIKYPLR.L	0.00538	99.4649	0
Q9DCN2	NADH-cytochrome b5 reductase 3 OS=Mus musculus GN=Cyb5r3 PE=1 SV=3	R.LIDKEVISPDTR.R	0.00909	99.0992	0
Q9DCN2	NADH-cytochrome b5 reductase 3 OS=Mus musculus GN=Cyb5r3 PE=1 SV=3	R.LIDKEVISPDTRR.F	0.00522	99.4807	0
Q9DCN2	NADH-cytochrome b5 reductase 3 OS=Mus musculus GN=Cyb5r3 PE=1 SV=3	R.FALPSPQHILGLPIGQHIYLSTR.I	0.01766	98.2646	0
Q9DCN2	NADH-cytochrome b5 reductase 3 OS=Mus musculus GN=Cyb5r3 PE=1 SV=3	R.IDGNLVIR.P	0.01351	98.667	0
Q9DCN2	NADH-cytochrome b5 reductase 3 OS=Mus musculus GN=Cyb5r3 PE=1 SV=3	R.IDGNLVIRPYTPVSSDDDKGFVDLVVK.V	0.00092	99.9081	0
Q9DCN2	NADH-cytochrome b5 reductase 3 OS=Mus musculus GN=Cyb5r3 PE=1 SV=3	R.IDGNLVIRPYTPVSSDDDKGFVDLVVK.V	0.0455	95.648	0
Q9DCN2	NADH-cytochrome b5 reductase 3 OS=Mus musculus GN=Cyb5r3 PE=1 SV=3	R.PYTPVSSDDDKGFVDLVVK.V	0.00195	99.8054	0
Q9DCN2	NADH-cytochrome b5 reductase 3 OS=Mus musculus GN=Cyb5r3 PE=1 SV=3	K.GFVDLVVK.V	0.00782	99.2241	0
Q9DCN2	NADH-cytochrome b5 reductase 3 OS=Mus musculus GN=Cyb5r3 PE=1 SV=3	K.MSQYLENMK.I	0.01068	98.9433	0
Q9DCN2	NADH-cytochrome b5 reductase 3 OS=Mus musculus GN=Cyb5r3 PE=1 SV=3	K.IGDTIEFR.G	0.01928	98.1085	0
Q9DCN2	NADH-cytochrome b5 reductase 3 OS=Mus musculus GN=Cyb5r3 PE=1 SV=3	R.GPNGLLVYQGK.G	0.01173	98.8406	0
Q9DCN2	NADH-cytochrome b5 reductase 3 OS=Mus musculus GN=Cyb5r3 PE=1 SV=3	K.SVGMIAGGTGITPMLQVIR.A	0.00847	99.1601	0
Q9DCN2	NADH-cytochrome b5 reductase 3 OS=Mus musculus GN=Cyb5r3 PE=1 SV=3	K.SVGMIAGGTGITPMLQVIR.A	0.01444	98.5766	0
Q9DCN2	NADH-cytochrome b5 reductase 3 OS=Mus musculus GN=Cyb5r3 PE=1 SV=3	M.IAGGTGITPMLQVIR.A	0.03901	96.2455	0
Q9DCN2	NADH-cytochrome b5 reductase 3 OS=Mus musculus GN=Cyb5r3 PE=1 SV=3	K.DILLRPELEEL.R	0.03791	96.3475	0
Q9DCN2	NADH-cytochrome b5 reductase 3 OS=Mus musculus GN=Cyb5r3 PE=1 SV=3	K.DILLRPELEELR.N	0.00159	99.8413	0
Q9DCN2	NADH-cytochrome b5 reductase 3 OS=Mus musculus GN=Cyb5r3 PE=1 SV=3	K.DILLRPELEELR.N	0.01753	98.2772	0
Q9DCN2	NADH-cytochrome b5 reductase 3 OS=Mus musculus GN=Cyb5r3 PE=1 SV=3	R.FKLWYTVDK.A	0.00271	99.7297	0
Q9DCN2	NADH-cytochrome b5 reductase 3 OS=Mus musculus GN=Cyb5r3 PE=1 SV=3	K.APDAWDYSQGFVNEEMIR.D	0.00973	99.0364	0
Q9DCN2	NADH-cytochrome b5 reductase 3 OS=Mus musculus GN=Cyb5r3 PE=1 SV=3	K.APDAWDYSQGFVNEEMIR.D	0.00259	99.7417	0
P62908	40S ribosomal protein S3 OS=Mus musculus GN=Rps3 PE=1 SV=1	K.AELNEFLTR.E	0.02182	97.8646	0
P62908	40S ribosomal protein S3 OS=Mus musculus GN=Rps3 PE=1 SV=1	R.ELAEDGYSGVEVR.V	0.02734	97.3388	0
P62908	40S ribosomal protein S3 OS=Mus musculus GN=Rps3 PE=1 SV=1	R.IRELTAVVQK.R	0.00121	99.8791	0
P62908	40S ribosomal protein S3 OS=Mus musculus GN=Rps3 PE=1 SV=1	R.FGFPEGSVELYAEK.V	0.03226	96.8748	0
P62908	40S ribosomal protein S3 OS=Mus musculus GN=Rps3 PE=1 SV=1	K.LLGGLAVR.R	0.01928	98.1085	0
P62908	40S ribosomal protein S3 OS=Mus musculus GN=Rps3 PE=1 SV=1	K.IMLPWDPSGK.I	0.03724	96.4097	0
P62908	40S ribosomal protein S3 OS=Mus musculus GN=Rps3 PE=1 SV=1	K.DEILPTTPISEQK.G	0.01217	98.7976	0
Q9D855	Cytochrome b-c1 complex subunit 7 OS=Mus musculus GN=Uqcrb PE=1 SV=3	K.WYYNAAGFNK.L	0.02795	97.281	0
Q9D855	Cytochrome b-c1 complex subunit 7 OS=Mus musculus GN=Uqcrb PE=1 SV=3	K.LGLMRDDTLHETEDVK.E	0.00302	99.6989	0
Q9D855	Cytochrome b-c1 complex subunit 7 OS=Mus musculus GN=Uqcrb PE=1 SV=3	R.DDTLHETEDVKEAIR.R	0.0024	99.7606	0
Q9D855	Cytochrome b-c1 complex subunit 7 OS=Mus musculus GN=Uqcrb PE=1 SV=3	R.DDTLHETEDVKEAIR.R	0.00812	99.1945	0
Q9D855	Cytochrome b-c1 complex subunit 7 OS=Mus musculus GN=Uqcrb PE=1 SV=3	R.LPEDLYNDR.M	0.01812	98.2202	0
Q9D855	Cytochrome b-c1 complex subunit 7 OS=Mus musculus GN=Uqcrb PE=1 SV=3	K.DQWTKYEEDKFYLEPYLK.E	0.01792	98.2395	0
Q9D855	Cytochrome b-c1 complex subunit 7 OS=Mus musculus GN=Uqcrb PE=1 SV=3	K.DQWTKYEEDKFYLEPYLK.E	0.00363	99.6383	0
Q9D855	Cytochrome b-c1 complex subunit 7 OS=Mus musculus GN=Uqcrb PE=1 SV=3	K.YEEDKFYLEPYLK.E	0.00147	99.8532	0
Q9D855	Cytochrome b-c1 complex subunit 7 OS=Mus musculus GN=Uqcrb PE=1 SV=3	K.FYLEPYLK.E	0.00955	99.054	0
P14733	Lamin-B1 OS=Mus musculus GN=Lmnb1 PE=1 SV=3	R.ASAPATPLSPTR.L	0.01977	98.0613	0
P14733	Lamin-B1 OS=Mus musculus GN=Lmnb1 PE=1 SV=3	K.ALYETELADAR.R	0.00922	99.0864	0
P14733	Lamin-B1 OS=Mus musculus GN=Lmnb1 PE=1 SV=3	K.AEHDQLLLNYAK.K	0.08041	92.5575	0
P14733	Lamin-B1 OS=Mus musculus GN=Lmnb1 PE=1 SV=3	K.LREYEAALNSK.D	0.00439	99.5629	0
P14733	Lamin-B1 OS=Mus musculus GN=Lmnb1 PE=1 SV=3	K.NMYEEEINETR.R	0.01577	98.4475	0
P14733	Lamin-B1 OS=Mus musculus GN=Lmnb1 PE=1 SV=3	R.LYKEELEQTYHAK.L	0.00562	99.4411	0
P14733	Lamin-B1 OS=Mus musculus GN=Lmnb1 PE=1 SV=3	R.LYKEELEQTYHAK.L	0.00904	99.1041	0
P14733	Lamin-B1 OS=Mus musculus GN=Lmnb1 PE=1 SV=3	R.IESLSSQLSNLQK.E	0.0531	94.9577	0
P14733	Lamin-B1 OS=Mus musculus GN=Lmnb1 PE=1 SV=3	R.IQELEDMLAK.E	0.0214	97.9048	0
P14733	Lamin-B1 OS=Mus musculus GN=Lmnb1 PE=1 SV=3	R.EMAEIRDQMQQQLSDYEQLLDVK.L	0.03739	96.3958	0
P14733	Lamin-B1 OS=Mus musculus GN=Lmnb1 PE=1 SV=3	R.DQMQQQLSDYEQLLDVK.L	0.02133	97.9115	0
P14733	Lamin-B1 OS=Mus musculus GN=Lmnb1 PE=1 SV=3	R.DQMQQQLSDYEQLLDVK.L	0.03487	96.6305	0
P14733	Lamin-B1 OS=Mus musculus GN=Lmnb1 PE=1 SV=3	K.NTSEQDQPMGGWEMIR.K	0.00726	99.2792	0
P14733	Lamin-B1 OS=Mus musculus GN=Lmnb1 PE=1 SV=3	K.TTIPEEEEEEEEEPIGVAVEEER.F	0.00391	99.6105	0
P14733	Lamin-B1 OS=Mus musculus GN=Lmnb1 PE=1 SV=3	K.TTIPEEEEEEEEEPIGVAVEEER.F	0.01606	98.4194	0
Q8CAQ8	MICOS complex subunit Mic60 OS=Mus musculus GN=Immt PE=1 SV=1	K.TIPYSDKLFGMVLGSAPYTVPLPK.K	0.07853	92.7188	0
Q8CAQ8	MICOS complex subunit Mic60 OS=Mus musculus GN=Immt PE=1 SV=1	K.STSETTEEAFSSSVR.E	0.00894	99.1139	0
Q8CAQ8	MICOS complex subunit Mic60 OS=Mus musculus GN=Immt PE=1 SV=1	R.TSSVTLQTITAQNAAVQAVK.A	0.01984	98.0546	0
Q8CAQ8	MICOS complex subunit Mic60 OS=Mus musculus GN=Immt PE=1 SV=1	K.AVDEAADALLK.A	0.01727	98.3023	0
Q8CAQ8	MICOS complex subunit Mic60 OS=Mus musculus GN=Immt PE=1 SV=1	R.EIAGATPHITAAEGR.L	0.01227	98.7879	0
Q8CAQ8	MICOS complex subunit Mic60 OS=Mus musculus GN=Immt PE=1 SV=1	R.LHNMIVDLDNVVK.K	0.04972	95.2635	0
Q8CAQ8	MICOS complex subunit Mic60 OS=Mus musculus GN=Immt PE=1 SV=1	R.LHNMIVDLDNVVK.K	0.0187	98.1643	0
Q8CAQ8	MICOS complex subunit Mic60 OS=Mus musculus GN=Immt PE=1 SV=1	R.LHNMIVDLDNVVKK.V	0.00979	99.0305	0
Q8CAQ8	MICOS complex subunit Mic60 OS=Mus musculus GN=Immt PE=1 SV=1	R.LHNMIVDLDNVVKK.V	0.01408	98.6115	0
Q8CAQ8	MICOS complex subunit Mic60 OS=Mus musculus GN=Immt PE=1 SV=1	K.VVSQYHELVVQAR.D	0.01661	98.3661	0
Q8CAQ8	MICOS complex subunit Mic60 OS=Mus musculus GN=Immt PE=1 SV=1	K.LSTDDLNSLIAHAHR.R	0.01067	98.9443	0
Q8CAQ8	MICOS complex subunit Mic60 OS=Mus musculus GN=Immt PE=1 SV=1	K.LSTDDLNSLIAHAHR.R	0.02689	97.3814	0
Q8CAQ8	MICOS complex subunit Mic60 OS=Mus musculus GN=Immt PE=1 SV=1	K.VEEVRDAMENEMR.T	0.02118	97.9259	0
Q8CAQ8	MICOS complex subunit Mic60 OS=Mus musculus GN=Immt PE=1 SV=1	K.VEEVRDAMENEMR.T	0.00222	99.7785	0
Q8CAQ8	MICOS complex subunit Mic60 OS=Mus musculus GN=Immt PE=1 SV=1	K.YEFEQGLSEK.L	0.0199	98.0488	0
Q8CAQ8	MICOS complex subunit Mic60 OS=Mus musculus GN=Immt PE=1 SV=1	K.LSEQELEFR.R	0.02035	98.0056	0
Q8CAQ8	MICOS complex subunit Mic60 OS=Mus musculus GN=Immt PE=1 SV=1	R.LRGIEQAVQSHAVAEEEAR.K	0.01114	98.8983	0
Q8CAQ8	MICOS complex subunit Mic60 OS=Mus musculus GN=Immt PE=1 SV=1	R.GIEQAVQSHAVAEEEAR.K	0.02076	97.9662	0
Q8CAQ8	MICOS complex subunit Mic60 OS=Mus musculus GN=Immt PE=1 SV=1	R.KAHQLWLSVEALK.Y	0.48224	67.4655	0
Q8CAQ8	MICOS complex subunit Mic60 OS=Mus musculus GN=Immt PE=1 SV=1	K.QLKPPAELYPEDINTFK.L	0.0144	98.5804	0
Q8CAQ8	MICOS complex subunit Mic60 OS=Mus musculus GN=Immt PE=1 SV=1	R.VAQDWLK.E	0.02785	97.2905	0
Q8R1M2	Histone H2A.J OS=Mus musculus GN=H2afj PE=1 SV=1	R.AGLQFPVGR.V	0.02642	97.426	0
Q8R1M2	Histone H2A.J OS=Mus musculus GN=H2afj PE=1 SV=1	A.AVLEYLTAEILELAGNAAR.D	0.0111	98.9022	0
Q8R1M2	Histone H2A.J OS=Mus musculus GN=H2afj PE=1 SV=1	A.AVLEYLTAEILELAGNAAR.D	0.02178	97.8684	0
Q8R1M2	Histone H2A.J OS=Mus musculus GN=H2afj PE=1 SV=1	R.VTIAQGGVLPNIQAVLLPKK.T	0.00067	99.933	0
Q8R1M2	Histone H2A.J OS=Mus musculus GN=H2afj PE=1 SV=1	V.TIAQGGVLPNIQAVLLPK.K	0.00223	99.7775	0
Q8R1M2	Histone H2A.J OS=Mus musculus GN=H2afj PE=1 SV=1	N.IQAVLLPK.K	0.02272	97.7785	0
P21619	Lamin-B2 OS=Mus musculus GN=Lmnb2 PE=1 SV=2	K.DLESLFHR.S	0.01133	98.8797	0
P21619	Lamin-B2 OS=Mus musculus GN=Lmnb2 PE=1 SV=2	R.SEAELATALSDK.Q	0.01326	98.6914	0
P21619	Lamin-B2 OS=Mus musculus GN=Lmnb2 PE=1 SV=2	K.QGLETEVAELR.A	0.01994	98.045	0
P21619	Lamin-B2 OS=Mus musculus GN=Lmnb2 PE=1 SV=2	K.MAQALEDLR.S	0.00602	99.4016	0
P21619	Lamin-B2 OS=Mus musculus GN=Lmnb2 PE=1 SV=2	R.VESLSYQLLGLQK.Q	0.02196	97.8512	0
P21619	Lamin-B2 OS=Mus musculus GN=Lmnb2 PE=1 SV=2	R.VESLSYQLLGLQK.Q	0.00579	99.4243	0
P21619	Lamin-B2 OS=Mus musculus GN=Lmnb2 PE=1 SV=2	K.QASAAENHIHELEEALAGER.D	0.03012	97.0761	0
P21619	Lamin-B2 OS=Mus musculus GN=Lmnb2 PE=1 SV=2	R.DAMQQQLAEYQELLDIK.L	0.03023	97.0657	0
P21619	Lamin-B2 OS=Mus musculus GN=Lmnb2 PE=1 SV=2	R.DAMQQQLAEYQELLDIK.L	0.00855	99.1522	0
P21619	Lamin-B2 OS=Mus musculus GN=Lmnb2 PE=1 SV=2	R.ATSSSSSSSGVGMSVGQGR.G	0.00315	99.686	0
P21619	Lamin-B2 OS=Mus musculus GN=Lmnb2 PE=1 SV=2	R.QVLEGEDIAYK.F	0.02038	98.0027	0
P21619	Lamin-B2 OS=Mus musculus GN=Lmnb2 PE=1 SV=2	R.AGQTVTVWAAGAGATHSPPSTLVWK.S	0.01662	98.3652	0
P21619	Lamin-B2 OS=Mus musculus GN=Lmnb2 PE=1 SV=2	K.SQTNWGPGESFR.T	0.01025	98.9854	0
P21619	Lamin-B2 OS=Mus musculus GN=Lmnb2 PE=1 SV=2	R.TALVSADGEEVAVK.A	0.01101	98.911	0
Q99LC5	Electron transfer flavoprotein subunit alpha, mitochondrial OS=Mus musculus GN=Etfa PE=1 SV=2	K.GLLPEELTPLILETQK.Q	0.00998	99.0119	0
Q99LC5	Electron transfer flavoprotein subunit alpha, mitochondrial OS=Mus musculus GN=Etfa PE=1 SV=2	K.GLLPEELTPLILETQK.Q	0.0127	98.7459	0
Q99LC5	Electron transfer flavoprotein subunit alpha, mitochondrial OS=Mus musculus GN=Etfa PE=1 SV=2	K.LNVAPVSDIIEIK.S	0.0298	97.1062	0
Q99LC5	Electron transfer flavoprotein subunit alpha, mitochondrial OS=Mus musculus GN=Etfa PE=1 SV=2	R.GTSFEAAATSGGSASSEK.A	0.01297	98.7196	0
Q99LC5	Electron transfer flavoprotein subunit alpha, mitochondrial OS=Mus musculus GN=Etfa PE=1 SV=2	K.APSSSSVGISEWLDQK.L	0.02248	97.8014	0
Q99LC5	Electron transfer flavoprotein subunit alpha, mitochondrial OS=Mus musculus GN=Etfa PE=1 SV=2	K.APSSSSVGISEWLDQK.L	0.01544	98.4795	0
Q99LC5	Electron transfer flavoprotein subunit alpha, mitochondrial OS=Mus musculus GN=Etfa PE=1 SV=2	R.AAVDAGFVPNDMQVGQTGK.I	0.01625	98.401	0
Q99LC5	Electron transfer flavoprotein subunit alpha, mitochondrial OS=Mus musculus GN=Etfa PE=1 SV=2	K.IVAPELYIAVGISGAIQHLAGMKDSK.T	0.04382	95.802	0
Q99LC5	Electron transfer flavoprotein subunit alpha, mitochondrial OS=Mus musculus GN=Etfa PE=1 SV=2	K.DPEAPIFQVADYGIVADLFK.V	0.03035	97.0544	0
Q99LC5	Electron transfer flavoprotein subunit alpha, mitochondrial OS=Mus musculus GN=Etfa PE=1 SV=2	K.DPEAPIFQVADYGIVADLFK.V	0.03266	96.8373	0
Q99LC5	Electron transfer flavoprotein subunit alpha, mitochondrial OS=Mus musculus GN=Etfa PE=1 SV=2	K.VVPEMTEILK.K	0.01981	98.0575	0
Q03265	ATP synthase subunit alpha, mitochondrial OS=Mus musculus GN=Atp5a1 PE=1 SV=1	Q.KTGTAEMSSILEER.I	0.09144	91.6221	0
Q03265	ATP synthase subunit alpha, mitochondrial OS=Mus musculus GN=Atp5a1 PE=1 SV=1	K.TGTAEMSSILEER.I	0.01352	98.666	0
Q03265	ATP synthase subunit alpha, mitochondrial OS=Mus musculus GN=Atp5a1 PE=1 SV=1	R.ILGADTSVDLEETGR.V	0.01906	98.1296	0
Q03265	ATP synthase subunit alpha, mitochondrial OS=Mus musculus GN=Atp5a1 PE=1 SV=1	R.VLSIGDGIAR.V	0.0234	97.7135	0
Q03265	ATP synthase subunit alpha, mitochondrial OS=Mus musculus GN=Atp5a1 PE=1 SV=1	K.GMSLNLEPDNVGVVVFGNDK.L	0.03275	96.8289	0
Q03265	ATP synthase subunit alpha, mitochondrial OS=Mus musculus GN=Atp5a1 PE=1 SV=1	K.GMSLNLEPDNVGVVVFGNDK.L	0.03639	96.4888	0
Q03265	ATP synthase subunit alpha, mitochondrial OS=Mus musculus GN=Atp5a1 PE=1 SV=1	K.GMSLNLEPDNVGVVVFGNDKLIK.E	0.00239	99.7616	0
Q03265	ATP synthase subunit alpha, mitochondrial OS=Mus musculus GN=Atp5a1 PE=1 SV=1	L.NLEPDNVGVVVFGNDK.L	0.00179	99.8213	0
Q03265	ATP synthase subunit alpha, mitochondrial OS=Mus musculus GN=Atp5a1 PE=1 SV=1	K.RTGAIVDVPVGEELLGR.V	0.00904	99.1041	0
Q03265	ATP synthase subunit alpha, mitochondrial OS=Mus musculus GN=Atp5a1 PE=1 SV=1	R.TGAIVDVPVGEELLGR.V	0.01513	98.5096	0
Q03265	ATP synthase subunit alpha, mitochondrial OS=Mus musculus GN=Atp5a1 PE=1 SV=1	R.VVDALGNAIDGK.G	0.02178	97.8684	0
Q03265	ATP synthase subunit alpha, mitochondrial OS=Mus musculus GN=Atp5a1 PE=1 SV=1	R.VVDALGNAIDGKGPIGSK.T	0.00536	99.4669	0
Q03265	ATP synthase subunit alpha, mitochondrial OS=Mus musculus GN=Atp5a1 PE=1 SV=1	R.ELIIGDR.Q	0.01539	98.4843	0
Q03265	ATP synthase subunit alpha, mitochondrial OS=Mus musculus GN=Atp5a1 PE=1 SV=1	K.TSIAIDTIINQKR.F	0.00407	99.5946	0
Q03265	ATP synthase subunit alpha, mitochondrial OS=Mus musculus GN=Atp5a1 PE=1 SV=1	R.EAYPGDVFYLHSR.L	0.02188	97.8588	0
Q03265	ATP synthase subunit alpha, mitochondrial OS=Mus musculus GN=Atp5a1 PE=1 SV=1	K.LELAQYR.E	0.00995	99.0148	0
Q03265	ATP synthase subunit alpha, mitochondrial OS=Mus musculus GN=Atp5a1 PE=1 SV=1	F.AQFGSDLDAATQQLLSR.G	0.0115	98.8631	0
Q03265	ATP synthase subunit alpha, mitochondrial OS=Mus musculus GN=Atp5a1 PE=1 SV=1	F.AQFGSDLDAATQQLLSR.G	0.00966	99.0432	0
Q03265	ATP synthase subunit alpha, mitochondrial OS=Mus musculus GN=Atp5a1 PE=1 SV=1	K.ITKFENAFLSHVISQHQSLLGNIR.S	0.0271	97.3615	0
Q03265	ATP synthase subunit alpha, mitochondrial OS=Mus musculus GN=Atp5a1 PE=1 SV=1	K.ITKFENAFLSHVISQHQSLLGNIR.S	0.01399	98.6203	0
Q03265	ATP synthase subunit alpha, mitochondrial OS=Mus musculus GN=Atp5a1 PE=1 SV=1	K.LKEIVTNFL.A	0.0107	98.9413	0
Q9CZU6	Citrate synthase, mitochondrial OS=Mus musculus GN=Cs PE=1 SV=1	H.ASASSTNLKDVLSNLIPK.E	0.00479	99.5233	0
Q9CZU6	Citrate synthase, mitochondrial OS=Mus musculus GN=Cs PE=1 SV=1	K.DVLSNLIPK.E	0.01381	98.6378	0
Q9CZU6	Citrate synthase, mitochondrial OS=Mus musculus GN=Cs PE=1 SV=1	K.GLVYETSVLDPDEGIR.F	0.02853	97.2261	0
Q9CZU6	Citrate synthase, mitochondrial OS=Mus musculus GN=Cs PE=1 SV=1	K.GLVYETSVLDPDEGIRF.R	0.11047	90.052	0
Q9CZU6	Citrate synthase, mitochondrial OS=Mus musculus GN=Cs PE=1 SV=1	K.GGEEPLPEGLFWLLVTGQMPTEEQVSWLSR.E	0.02698	97.3729	0
Q9CZU6	Citrate synthase, mitochondrial OS=Mus musculus GN=Cs PE=1 SV=1	L.VTGQMPTEEQVSWLSR.E	0.00811	99.1955	0
Q9CZU6	Citrate synthase, mitochondrial OS=Mus musculus GN=Cs PE=1 SV=1	R.AALPSHVVTMLDNFPTNLHPMSQLSAAITALNSESNFAR.A	0.03108	96.9857	0
Q9CZU6	Citrate synthase, mitochondrial OS=Mus musculus GN=Cs PE=1 SV=1	T.MLDNFPTNLHPMSQLSAAITALNSESNFAR.A	0.06088	94.2614	0
Q9CZU6	Citrate synthase, mitochondrial OS=Mus musculus GN=Cs PE=1 SV=1	M.SQLSAAITALNSESNFAR.A	0.02292	97.7594	0
Q9CZU6	Citrate synthase, mitochondrial OS=Mus musculus GN=Cs PE=1 SV=1	M.SQLSAAITALNSESNFAR.A	0.00661	99.3433	0
Q9CZU6	Citrate synthase, mitochondrial OS=Mus musculus GN=Cs PE=1 SV=1	L.SAAITALNSESNFAR.A	0.02097	97.9461	0
Q9CZU6	Citrate synthase, mitochondrial OS=Mus musculus GN=Cs PE=1 SV=1	R.EGSSIGAIDSR.L	0.07107	93.3646	0
Q9CZU6	Citrate synthase, mitochondrial OS=Mus musculus GN=Cs PE=1 SV=1	R.LDWSHNFTNMLGYTDPQFTELMR.L	0.02854	97.2252	0
Q9CZU6	Citrate synthase, mitochondrial OS=Mus musculus GN=Cs PE=1 SV=1	R.DYIWNTLNSGR.V	0.00942	99.0668	0
Q9CZU6	Citrate synthase, mitochondrial OS=Mus musculus GN=Cs PE=1 SV=1	K.LVAQLYK.I	0.02951	97.1336	0
Q9CZU6	Citrate synthase, mitochondrial OS=Mus musculus GN=Cs PE=1 SV=1	K.IVPNILLEQGK.A	0.03875	96.2696	0
Q9CZU6	Citrate synthase, mitochondrial OS=Mus musculus GN=Cs PE=1 SV=1	R.ALGFPLER.P	0.01345	98.6729	0
Q9CZU6	Citrate synthase, mitochondrial OS=Mus musculus GN=Cs PE=1 SV=1	R.ALGFPLERPK.S	0.00348	99.6532	0
Q9CZU6	Citrate synthase, mitochondrial OS=Mus musculus GN=Cs PE=1 SV=1	K.SMSTDGLMK.F	0.02661	97.408	0
Q8CGP5	Histone H2A type 1-F OS=Mus musculus GN=Hist1h2af PE=1 SV=3	R.AGLQFPVGR.V	0.02642	97.426	0
Q8CGP5	Histone H2A type 1-F OS=Mus musculus GN=Hist1h2af PE=1 SV=3	A.AVLEYLTAEILELAGNAAR.D	0.0111	98.9022	0
Q8CGP5	Histone H2A type 1-F OS=Mus musculus GN=Hist1h2af PE=1 SV=3	A.AVLEYLTAEILELAGNAAR.D	0.02178	97.8684	0
Q8CGP5	Histone H2A type 1-F OS=Mus musculus GN=Hist1h2af PE=1 SV=3	R.VTIAQGGVLPNIQAVLLPKK.T	0.00067	99.933	0
Q8CGP5	Histone H2A type 1-F OS=Mus musculus GN=Hist1h2af PE=1 SV=3	V.TIAQGGVLPNIQAVLLPK.K	0.00223	99.7775	0
Q8CGP5	Histone H2A type 1-F OS=Mus musculus GN=Hist1h2af PE=1 SV=3	N.IQAVLLPK.K	0.02272	97.7785	0
O08547	Vesicle-trafficking protein SEC22b OS=Mus musculus GN=Sec22b PE=1 SV=3	R.VADGLPLAASMQEDEQSGR.D	0.05874	94.4519	0
O08547	Vesicle-trafficking protein SEC22b OS=Mus musculus GN=Sec22b PE=1 SV=3	R.NLGSINTELQDVQR.I	0.04235	95.9371	0
O08547	Vesicle-trafficking protein SEC22b OS=Mus musculus GN=Sec22b PE=1 SV=3	R.IMVANIEEVLQR.G	0.00827	99.1798	0
O08547	Vesicle-trafficking protein SEC22b OS=Mus musculus GN=Sec22b PE=1 SV=3	R.GEALSALDSK.A	0.01308	98.7089	0
O08547	Vesicle-trafficking protein SEC22b OS=Mus musculus GN=Sec22b PE=1 SV=3	K.ANNLSSLSK.K	0.0136	98.6582	0
P62843	40S ribosomal protein S15 OS=Mus musculus GN=Rps15 PE=2 SV=2	R.DMIILPEMVGSMVGVYNGK.T	0.00729	99.2763	0
P62843	40S ribosomal protein S15 OS=Mus musculus GN=Rps15 PE=2 SV=2	R.DMIILPEMVGSMVGVYNGK.T	0.01507	98.5154	0
P62843	40S ribosomal protein S15 OS=Mus musculus GN=Rps15 PE=2 SV=2	K.TFNQVEIKPEMIGHYL.G	0.07919	92.6621	0
Q9D6K5	Synaptojanin-2-binding protein OS=Mus musculus GN=Synj2bp PE=1 SV=1	K.NLLHQDAVDLFR.N	0.00767	99.2388	0
Q8BH59	Calcium-binding mitochondrial carrier protein Aralar1 OS=Mus musculus GN=Slc25a12 PE=1 SV=1	R.NIFLQYASTEVDGEHYMTPEDFVQR.Y	0.00992	99.0177	0
Q8BH59	Calcium-binding mitochondrial carrier protein Aralar1 OS=Mus musculus GN=Slc25a12 PE=1 SV=1	R.NIFLQYASTEVDGEHYMTPEDFVQR.Y	0.03888	96.2575	0
Q8BH59	Calcium-binding mitochondrial carrier protein Aralar1 OS=Mus musculus GN=Slc25a12 PE=1 SV=1	R.YLGLYNDPNSNPK.I	0.04307	95.8708	0
Q8BH59	Calcium-binding mitochondrial carrier protein Aralar1 OS=Mus musculus GN=Slc25a12 PE=1 SV=1	K.IVQLLAGVADQTK.D	0.00555	99.4481	0
Q8BH59	Calcium-binding mitochondrial carrier protein Aralar1 OS=Mus musculus GN=Slc25a12 PE=1 SV=1	K.DIEVTKEEFAQSAIR.Y	0.00888	99.1198	0
Q8BH59	Calcium-binding mitochondrial carrier protein Aralar1 OS=Mus musculus GN=Slc25a12 PE=1 SV=1	K.DIEVTKEEFAQSAIR.Y	0.02251	97.7986	0
Q8BH59	Calcium-binding mitochondrial carrier protein Aralar1 OS=Mus musculus GN=Slc25a12 PE=1 SV=1	R.YGQVTPLEIDILYQLADLYNASGR.L	0.00948	99.0609	0
Q8BH59	Calcium-binding mitochondrial carrier protein Aralar1 OS=Mus musculus GN=Slc25a12 PE=1 SV=1	R.YGQVTPLEIDILYQLADLYNASGR.L	0.04344	95.8368	0
Q8BH59	Calcium-binding mitochondrial carrier protein Aralar1 OS=Mus musculus GN=Slc25a12 PE=1 SV=1	R.LTLADIER.I	0.01329	98.6884	0
Q8BH59	Calcium-binding mitochondrial carrier protein Aralar1 OS=Mus musculus GN=Slc25a12 PE=1 SV=1	R.IAPLAEGALPYNLAELQR.Q	0.0177	98.2608	0
Q8BH59	Calcium-binding mitochondrial carrier protein Aralar1 OS=Mus musculus GN=Slc25a12 PE=1 SV=1	R.IAPLAEGALPYNLAELQR.Q	0.01489	98.5328	0
Q8BH59	Calcium-binding mitochondrial carrier protein Aralar1 OS=Mus musculus GN=Slc25a12 PE=1 SV=1	R.YEGFFGLYR.G	0.02022	98.0181	0
Q8BH59	Calcium-binding mitochondrial carrier protein Aralar1 OS=Mus musculus GN=Slc25a12 PE=1 SV=1	R.VSALNVLQDLGLFGLYK.G	0.02319	97.7336	0
Q8BH59	Calcium-binding mitochondrial carrier protein Aralar1 OS=Mus musculus GN=Slc25a12 PE=1 SV=1	R.VSALNVLQDLGLFGLYK.G	0.02822	97.2555	0
Q8BH59	Calcium-binding mitochondrial carrier protein Aralar1 OS=Mus musculus GN=Slc25a12 PE=1 SV=1	K.LLLADENGR.V	0.06788	93.6435	0
Q8BH59	Calcium-binding mitochondrial carrier protein Aralar1 OS=Mus musculus GN=Slc25a12 PE=1 SV=1	R.VGGINLLTAGALAGVPAASLVTPADVIK.T	0.02822	97.2555	0
Q8BH59	Calcium-binding mitochondrial carrier protein Aralar1 OS=Mus musculus GN=Slc25a12 PE=1 SV=1	R.EEGPSAFWK.G	0.00711	99.294	0
Q8BH59	Calcium-binding mitochondrial carrier protein Aralar1 OS=Mus musculus GN=Slc25a12 PE=1 SV=1	R.LATATFAGIENK.F	0.0129	98.7264	0
Q8BH59	Calcium-binding mitochondrial carrier protein Aralar1 OS=Mus musculus GN=Slc25a12 PE=1 SV=1	K.FGLYLPK.F	0.00785	99.2211	0
Q9CR62	Mitochondrial 2-oxoglutarate/malate carrier protein OS=Mus musculus GN=Slc25a11 PE=1 SV=3	K.TSFHALTSILK.T	0.00644	99.3601	0
Q9CR62	Mitochondrial 2-oxoglutarate/malate carrier protein OS=Mus musculus GN=Slc25a11 PE=1 SV=3	K.TSFHALTSILK.T	0.01454	98.5668	0
Q9CR62	Mitochondrial 2-oxoglutarate/malate carrier protein OS=Mus musculus GN=Slc25a11 PE=1 SV=3	K.GIYTGLSAGLLR.Q	0.00891	99.1169	0
Q9CR62	Mitochondrial 2-oxoglutarate/malate carrier protein OS=Mus musculus GN=Slc25a11 PE=1 SV=3	R.LTGADGTPPGFLLK.A	0.0084	99.167	0
Q9CR62	Mitochondrial 2-oxoglutarate/malate carrier protein OS=Mus musculus GN=Slc25a11 PE=1 SV=3	K.NVFNALVR.I	0.01723	98.3062	0
Q9CR62	Mitochondrial 2-oxoglutarate/malate carrier protein OS=Mus musculus GN=Slc25a11 PE=1 SV=3	R.EEGVPTLWR.G	0.00991	99.0187	0
Q9CR62	Mitochondrial 2-oxoglutarate/malate carrier protein OS=Mus musculus GN=Slc25a11 PE=1 SV=3	R.AVVVNAAQLASYSQSK.Q	0.02295	97.7565	0
Q9CR62	Mitochondrial 2-oxoglutarate/malate carrier protein OS=Mus musculus GN=Slc25a11 PE=1 SV=3	R.MIDGKPEYK.N	0.0012	99.8801	0
Q9CR62	Mitochondrial 2-oxoglutarate/malate carrier protein OS=Mus musculus GN=Slc25a11 PE=1 SV=3	K.NGLDVLLK.V	0.01041	98.9697	0
Q9CR62	Mitochondrial 2-oxoglutarate/malate carrier protein OS=Mus musculus GN=Slc25a11 PE=1 SV=3	R.YEGFFSLWK.G	0.01179	98.8347	0
Q64522	Histone H2A type 2-B OS=Mus musculus GN=Hist2h2ab PE=1 SV=3	R.AGLQFPVGR.V	0.02642	97.426	0
Q64522	Histone H2A type 2-B OS=Mus musculus GN=Hist2h2ab PE=1 SV=3	A.AVLEYLTAEILELAGNAAR.D	0.0111	98.9022	0
Q64522	Histone H2A type 2-B OS=Mus musculus GN=Hist2h2ab PE=1 SV=3	A.AVLEYLTAEILELAGNAAR.D	0.02178	97.8684	0
Q64522	Histone H2A type 2-B OS=Mus musculus GN=Hist2h2ab PE=1 SV=3	K.LLGGVTIAQGGVLPNIQAVLLPK.K	0.0246	97.5991	0
Q64522	Histone H2A type 2-B OS=Mus musculus GN=Hist2h2ab PE=1 SV=3	K.LLGGVTIAQGGVLPNIQAVLLPK.K	0.03075	97.0167	0
Q64522	Histone H2A type 2-B OS=Mus musculus GN=Hist2h2ab PE=1 SV=3	G.VTIAQGGVLPNIQAVLLPKK.T	0.00067	99.933	0
Q64522	Histone H2A type 2-B OS=Mus musculus GN=Hist2h2ab PE=1 SV=3	V.TIAQGGVLPNIQAVLLPK.K	0.00223	99.7775	0
Q64522	Histone H2A type 2-B OS=Mus musculus GN=Hist2h2ab PE=1 SV=3	N.IQAVLLPK.K	0.02272	97.7785	0
Q9CYL5	Golgi-associated plant pathogenesis-related protein 1 OS=Mus musculus GN=Glipr2 PE=2 SV=3	R.EAQQYSEALASTR.I	0.02099	97.9442	0
Q9CYL5	Golgi-associated plant pathogenesis-related protein 1 OS=Mus musculus GN=Glipr2 PE=2 SV=3	K.SYNFQQPGFTSGTGHFTAMVWK.N	0.00237	99.7636	0
Q9CYL5	Golgi-associated plant pathogenesis-related protein 1 OS=Mus musculus GN=Glipr2 PE=2 SV=3	K.ASASDGSSFVVAR.Y	0.01483	98.5387	0
Q9CYL5	Golgi-associated plant pathogenesis-related protein 1 OS=Mus musculus GN=Glipr2 PE=2 SV=3	R.YFPAGNIVNQGFFEENVPPPKK.-	0.00153	99.8472	0
P38647	Stress-70 protein, mitochondrial OS=Mus musculus GN=Hspa9 PE=1 SV=3	K.VLENAEGAR.T	0.01251	98.7645	0
P38647	Stress-70 protein, mitochondrial OS=Mus musculus GN=Hspa9 PE=1 SV=3	K.RQAVTNPNNTFYATK.R	0.029	97.1817	0
P38647	Stress-70 protein, mitochondrial OS=Mus musculus GN=Hspa9 PE=1 SV=3	K.RQAVTNPNNTFYATK.R	0.07069	93.3977	0
P38647	Stress-70 protein, mitochondrial OS=Mus musculus GN=Hspa9 PE=1 SV=3	R.QAVTNPNNTFYATK.R	0.01862	98.172	0
P38647	Stress-70 protein, mitochondrial OS=Mus musculus GN=Hspa9 PE=1 SV=3	R.QAVTNPNNTFYATKR.L	0.00627	99.3769	0
P38647	Stress-70 protein, mitochondrial OS=Mus musculus GN=Hspa9 PE=1 SV=3	R.QAVTNPNNTFYATKR.L	0.0143	98.5902	0
P38647	Stress-70 protein, mitochondrial OS=Mus musculus GN=Hspa9 PE=1 SV=3	K.LYSPSQIGAFVLMK.M	0.03402	96.7099	0
P38647	Stress-70 protein, mitochondrial OS=Mus musculus GN=Hspa9 PE=1 SV=3	K.LYSPSQIGAFVLMK.M	0.02489	97.5714	0
P38647	Stress-70 protein, mitochondrial OS=Mus musculus GN=Hspa9 PE=1 SV=3	K.MKETAENYLGH.T	0.05555	94.7373	0
P38647	Stress-70 protein, mitochondrial OS=Mus musculus GN=Hspa9 PE=1 SV=3	K.MKETAENYLGH.T	0.00895	99.1129	0
P38647	Stress-70 protein, mitochondrial OS=Mus musculus GN=Hspa9 PE=1 SV=3	K.NAVITVPAYFNDSQR.Q	0.02831	97.2469	0
P38647	Stress-70 protein, mitochondrial OS=Mus musculus GN=Hspa9 PE=1 SV=3	K.NAVITVPAYFNDSQR.Q	0.02345	97.7087	0
P38647	Stress-70 protein, mitochondrial OS=Mus musculus GN=Hspa9 PE=1 SV=3	K.DAGQISGLNVLR.V	0.02829	97.2488	0
P38647	Stress-70 protein, mitochondrial OS=Mus musculus GN=Hspa9 PE=1 SV=3	R.VINEPTAAALAYGLDK.S	0.03226	96.8748	0
P38647	Stress-70 protein, mitochondrial OS=Mus musculus GN=Hspa9 PE=1 SV=3	R.VINEPTAAALAYGLDK.S	0.00952	99.057	0
P38647	Stress-70 protein, mitochondrial OS=Mus musculus GN=Hspa9 PE=1 SV=3	R.ETGVDLTKDNMALQR.V	0.0041	99.5917	0
P38647	Stress-70 protein, mitochondrial OS=Mus musculus GN=Hspa9 PE=1 SV=3	R.AQFEGIVTDLIKR.T	0.01046	98.9648	0
P38647	Stress-70 protein, mitochondrial OS=Mus musculus GN=Hspa9 PE=1 SV=3	A.QFEGIVTDLIK.R	0.0105	98.9609	0
P38647	Stress-70 protein, mitochondrial OS=Mus musculus GN=Hspa9 PE=1 SV=3	K.AMQDAEVSKSDIGEVILVGGMTR.M	0.03802	96.3373	0
P38647	Stress-70 protein, mitochondrial OS=Mus musculus GN=Hspa9 PE=1 SV=3	K.SDIGEVILVGGMTR.M	0.02157	97.8885	0
P38647	Stress-70 protein, mitochondrial OS=Mus musculus GN=Hspa9 PE=1 SV=3	K.SDIGEVILVGGMTR.M	0.00933	99.0756	0
P38647	Stress-70 protein, mitochondrial OS=Mus musculus GN=Hspa9 PE=1 SV=3	K.VQQTVQDLFGR.A	0.01268	98.7479	0
P38647	Stress-70 protein, mitochondrial OS=Mus musculus GN=Hspa9 PE=1 SV=3	L.LLDVTPLSLGIETLGGVFTK.L	0.10925	90.151	0
P38647	Stress-70 protein, mitochondrial OS=Mus musculus GN=Hspa9 PE=1 SV=3	L.LLDVTPLSLGIETLGGVFTK.L	0.1517	86.8282	0
P38647	Stress-70 protein, mitochondrial OS=Mus musculus GN=Hspa9 PE=1 SV=3	L.DVTPLSLGIETLGGVFTK.L	0.0084	99.167	0
P38647	Stress-70 protein, mitochondrial OS=Mus musculus GN=Hspa9 PE=1 SV=3	L.DVTPLSLGIETLGGVFTK.L	0.05432	94.8479	0
P38647	Stress-70 protein, mitochondrial OS=Mus musculus GN=Hspa9 PE=1 SV=3	L.SLGIETLGGVFTK.L	0.02545	97.5182	0
P38647	Stress-70 protein, mitochondrial OS=Mus musculus GN=Hspa9 PE=1 SV=3	K.LLGQFTLIGIPPAPR.G	0.01124	98.8885	0
P38647	Stress-70 protein, mitochondrial OS=Mus musculus GN=Hspa9 PE=1 SV=3	K.LLGQFTLIGIPPAPR.G	0.00552	99.451	0
P38647	Stress-70 protein, mitochondrial OS=Mus musculus GN=Hspa9 PE=1 SV=3	K.DDIENMVK.N	0.03259	96.8439	0
P38647	Stress-70 protein, mitochondrial OS=Mus musculus GN=Hspa9 PE=1 SV=3	K.ERVEAVNMAEGIIHDTETK.M	0.02978	97.1081	0
P38647	Stress-70 protein, mitochondrial OS=Mus musculus GN=Hspa9 PE=1 SV=3	K.LFEMAYK.K	0.01442	98.5785	0
P38647	Stress-70 protein, mitochondrial OS=Mus musculus GN=Hspa9 PE=1 SV=3	K.LFEMAYKK.M	0.00347	99.6542	0
Q9CPQ3	Mitochondrial import receptor subunit TOM22 homolog OS=Mus musculus GN=Tomm22 PE=2 SV=3	R.LWGLTEMFPER.V	0.02003	98.0363	0
Q9CPQ3	Mitochondrial import receptor subunit TOM22 homolog OS=Mus musculus GN=Tomm22 PE=2 SV=3	K.LQMEQQQQLQQR.Q	0.01221	98.7937	0
Q9CPQ3	Mitochondrial import receptor subunit TOM22 homolog OS=Mus musculus GN=Tomm22 PE=2 SV=3	R.QILLGPNTGLSGGMPGALPPLPGK.M	0.00085	99.9151	0
Q9CPQ3	Mitochondrial import receptor subunit TOM22 homolog OS=Mus musculus GN=Tomm22 PE=2 SV=3	R.QILLGPNTGLSGGMPGALPPLPGK.M	0.01241	98.7742	0
Q9D6F9	Tubulin beta-4A chain OS=Mus musculus GN=Tubb4a PE=1 SV=3	R.AVLVDLEPGTMDSVR.S	0.03159	96.9377	0
Q9D6F9	Tubulin beta-4A chain OS=Mus musculus GN=Tubb4a PE=1 SV=3	R.SGPFGQIFRPDNFVFGQSGAGNNWA.K	0.01914	98.1219	0
Q9D6F9	Tubulin beta-4A chain OS=Mus musculus GN=Tubb4a PE=1 SV=3	R.SGPFGQIFRPDNFVFGQSGAGNNWAK.G	0.00893	99.1149	0
Q9D6F9	Tubulin beta-4A chain OS=Mus musculus GN=Tubb4a PE=1 SV=3	R.IMNTFSVVPSPK.V	0.04671	95.5374	0
Q9D6F9	Tubulin beta-4A chain OS=Mus musculus GN=Tubb4a PE=1 SV=3	R.KLAVNMVPFPR.L	0.00234	99.7665	0
Q9D6F9	Tubulin beta-4A chain OS=Mus musculus GN=Tubb4a PE=1 SV=3	K.LAVNMVPFPR.L	0.02546	97.5172	0
Q9D6F9	Tubulin beta-4A chain OS=Mus musculus GN=Tubb4a PE=1 SV=3	R.LHFFMPGFAPLTSR.G	0.02201	97.8464	0
Q9D6F9	Tubulin beta-4A chain OS=Mus musculus GN=Tubb4a PE=1 SV=3	R.ALTVPELTQQMFDAK.N	0.02648	97.4203	0
Q9D6F9	Tubulin beta-4A chain OS=Mus musculus GN=Tubb4a PE=1 SV=3	R.ALTVPELTQQMFDAK.N	0.02152	97.8933	0
Q9D6F9	Tubulin beta-4A chain OS=Mus musculus GN=Tubb4a PE=1 SV=3	K.NSSYFVEWIPNNVK.T	0.02704	97.3672	0
Q9D6F9	Tubulin beta-4A chain OS=Mus musculus GN=Tubb4a PE=1 SV=3	K.NSSYFVEWIPNNVK.T	0.01088	98.9237	0
Q9D6F9	Tubulin beta-4A chain OS=Mus musculus GN=Tubb4a PE=1 SV=3	N.SSYFVEWIPNNVK.T	0.11166	89.9556	0
Q9D6F9	Tubulin beta-4A chain OS=Mus musculus GN=Tubb4a PE=1 SV=3	R.ISEQFTAMFR.R	0.0224	97.8091	0
P05202	Aspartate aminotransferase, mitochondrial OS=Mus musculus GN=Got2 PE=1 SV=1	A.SSWWTHVEMGPPDPILGVTEAFK.R	0.00193	99.8074	0
P05202	Aspartate aminotransferase, mitochondrial OS=Mus musculus GN=Got2 PE=1 SV=1	A.SSWWTHVEMGPPDPILGVTEAFK.R	0.01811	98.2212	0
P05202	Aspartate aminotransferase, mitochondrial OS=Mus musculus GN=Got2 PE=1 SV=1	A.SSWWTHVEMGPPDPILGVTEAFKR.D	0.006	99.4036	0
P05202	Aspartate aminotransferase, mitochondrial OS=Mus musculus GN=Got2 PE=1 SV=1	A.SSWWTHVEMGPPDPILGVTEAFKR.D	0.01369	98.6495	0
P05202	Aspartate aminotransferase, mitochondrial OS=Mus musculus GN=Got2 PE=1 SV=1	K.MNLGVGAYR.D	0.01818	98.2145	0
P05202	Aspartate aminotransferase, mitochondrial OS=Mus musculus GN=Got2 PE=1 SV=1	R.DDNGKPYVLPSVR.K	0.00404	99.5976	0
P05202	Aspartate aminotransferase, mitochondrial OS=Mus musculus GN=Got2 PE=1 SV=1	R.DDNGKPYVLPSVR.K	2.71385	26.9262	0
P05202	Aspartate aminotransferase, mitochondrial OS=Mus musculus GN=Got2 PE=1 SV=1	K.ASAELALGENNEVLK.S	0.02815	97.2621	0
P05202	Aspartate aminotransferase, mitochondrial OS=Mus musculus GN=Got2 PE=1 SV=1	R.FVTVQTISGTGALR.V	0.0139	98.6291	0
P05202	Aspartate aminotransferase, mitochondrial OS=Mus musculus GN=Got2 PE=1 SV=1	R.VGASFLQR.F	0.0165	98.3768	0
P05202	Aspartate aminotransferase, mitochondrial OS=Mus musculus GN=Got2 PE=1 SV=1	R.DAGMQLQGYR.Y	0.01546	98.4775	0
P05202	Aspartate aminotransferase, mitochondrial OS=Mus musculus GN=Got2 PE=1 SV=1	K.NMGLYGER.V	0.0328	96.8242	0
P05202	Aspartate aminotransferase, mitochondrial OS=Mus musculus GN=Got2 PE=1 SV=1	K.ILIRPLYSNPPLNGAR.I	0.00022	99.978	0
P05202	Aspartate aminotransferase, mitochondrial OS=Mus musculus GN=Got2 PE=1 SV=1	K.ILIRPLYSNPPLNGAR.I	0.00354	99.6472	0
P05202	Aspartate aminotransferase, mitochondrial OS=Mus musculus GN=Got2 PE=1 SV=1	R.PLYSNPPLNGAR.I	0.02496	97.5648	0
P05202	Aspartate aminotransferase, mitochondrial OS=Mus musculus GN=Got2 PE=1 SV=1	R.IAATILTSPDLR.K	0.01366	98.6524	0
P05202	Aspartate aminotransferase, mitochondrial OS=Mus musculus GN=Got2 PE=1 SV=1	R.IAATILTSPDLRK.Q	0.00286	99.7148	0
P05202	Aspartate aminotransferase, mitochondrial OS=Mus musculus GN=Got2 PE=1 SV=1	R.KQWLQEVK.G	0.00506	99.4965	0
P05202	Aspartate aminotransferase, mitochondrial OS=Mus musculus GN=Got2 PE=1 SV=1	K.EFSVYMTK.D	0.0362	96.5065	0
P35564	Calnexin OS=Mus musculus GN=Canx PE=1 SV=1	K.APVPTGEVYFADSFDR.G	0.00856	99.1513	0
P35564	Calnexin OS=Mus musculus GN=Canx PE=1 SV=1	K.APVPTGEVYFADSFDR.G	0.00283	99.7178	0
P35564	Calnexin OS=Mus musculus GN=Canx PE=1 SV=1	R.GSLSGWILSK.A	0.01145	98.868	0
P35564	Calnexin OS=Mus musculus GN=Canx PE=1 SV=1	K.YDGKWEVDEMK.E	0.00377	99.6244	0
P35564	Calnexin OS=Mus musculus GN=Canx PE=1 SV=1	K.YDGKWEVDEMKETK.L	0.00175	99.8253	0
P35564	Calnexin OS=Mus musculus GN=Canx PE=1 SV=1	K.YDGKWEVDEMKETK.L	0.0043	99.5718	0
P35564	Calnexin OS=Mus musculus GN=Canx PE=1 SV=1	K.WEVDEMKETK.L	0.00571	99.4322	0
P35564	Calnexin OS=Mus musculus GN=Canx PE=1 SV=1	K.WEVDEMKETK.L	0.02121	97.9231	0
P35564	Calnexin OS=Mus musculus GN=Canx PE=1 SV=1	K.TAELSLDQFHDK.T	0.01336	98.6816	0
P35564	Calnexin OS=Mus musculus GN=Canx PE=1 SV=1	K.TAELSLDQFHDK.T	0.01173	98.8406	0
P35564	Calnexin OS=Mus musculus GN=Canx PE=1 SV=1	K.TAELSLDQFHDKTPY.T	0.00553	99.45	0
P35564	Calnexin OS=Mus musculus GN=Canx PE=1 SV=1	K.TAELSLDQFHDKTPY.T	0.00406	99.5956	0
P35564	Calnexin OS=Mus musculus GN=Canx PE=1 SV=1	K.TAELSLDQFHDKTPYTIMFGPDK.C	0.00393	99.6085	0
P35564	Calnexin OS=Mus musculus GN=Canx PE=1 SV=1	K.TPYTIMFGPDK.C	0.03526	96.5941	0
P35564	Calnexin OS=Mus musculus GN=Canx PE=1 SV=1	K.THLYTLILNPDNSFEILVDQSVVNSGNLLNDMTPPVNPSR.E	0.03149	96.9471	0
P35564	Calnexin OS=Mus musculus GN=Canx PE=1 SV=1	K.THLYTLILNPDNSFEILVDQSVVNSGNLLNDMTPPVNPSR.E	0.02867	97.2129	0
P35564	Calnexin OS=Mus musculus GN=Canx PE=1 SV=1	R.PMIDNPNYK.G	0.011	98.912	0
P35564	Calnexin OS=Mus musculus GN=Canx PE=1 SV=1	K.WKPPMIDNPNYQGIWKPR.K	0.00964	99.0452	0
P35564	Calnexin OS=Mus musculus GN=Canx PE=1 SV=1	K.WKPPMIDNPNYQGIWKPR.K	0.00129	99.8712	0
P35564	Calnexin OS=Mus musculus GN=Canx PE=1 SV=1	R.KIPNPDFFEDLEPFK.M	0.00627	99.3769	0
P35564	Calnexin OS=Mus musculus GN=Canx PE=1 SV=1	K.IPNPDFFEDLEPFK.M	0.0062	99.3838	0
P35564	Calnexin OS=Mus musculus GN=Canx PE=1 SV=1	M.TSDIFFDNFIISGDR.R	0.06448	93.9426	0
P35564	Calnexin OS=Mus musculus GN=Canx PE=1 SV=1	R.VVDDWANDGWGLK.K	0.0113	98.8826	0
Q9D1D4	Transmembrane emp24 domain-containing protein 10 OS=Mus musculus GN=Tmed10 PE=2 SV=1	K.ITDSAGHILYAK.E	0.01252	98.7635	0
Q9D1D4	Transmembrane emp24 domain-containing protein 10 OS=Mus musculus GN=Tmed10 PE=2 SV=1	K.ITDSAGHILYAK.E	0.05096	95.1511	0
Q9D1D4	Transmembrane emp24 domain-containing protein 10 OS=Mus musculus GN=Tmed10 PE=2 SV=1	R.RLEDLSESIVNDFAYMK.K	0.00118	99.8821	0
Q9D1D4	Transmembrane emp24 domain-containing protein 10 OS=Mus musculus GN=Tmed10 PE=2 SV=1	R.RLEDLSESIVNDFAYMK.K	0.01268	98.7479	0
Q9D1D4	Transmembrane emp24 domain-containing protein 10 OS=Mus musculus GN=Tmed10 PE=2 SV=1	R.RLEDLSESIVNDFAYMKK.R	0.0417	95.9969	0
Q9D1D4	Transmembrane emp24 domain-containing protein 10 OS=Mus musculus GN=Tmed10 PE=2 SV=1	R.LEDLSESIVNDFAYMK.K	0.01362	98.6563	0
Q9D1D4	Transmembrane emp24 domain-containing protein 10 OS=Mus musculus GN=Tmed10 PE=2 SV=1	R.LEDLSESIVNDFAYMK.K	0.0098	99.0295	0
P61022	Calcineurin B homologous protein 1 OS=Mus musculus GN=Chp1 PE=1 SV=2	R.FTSLDKGENGTLSR.E	0.00565	99.4382	0
P61022	Calcineurin B homologous protein 1 OS=Mus musculus GN=Chp1 PE=1 SV=2	R.FTSLDKGENGTLSR.E	0.0134	98.6777	0
P61022	Calcineurin B homologous protein 1 OS=Mus musculus GN=Chp1 PE=1 SV=2	R.IPELAINPLGDR.I	0.00158	99.8422	0
Q8CI43	Myosin light chain 6B OS=Mus musculus GN=Myl6b PE=2 SV=1	K.VVIEFNKDQLEEFR.E	0.07812	92.7541	0
Q8CI43	Myosin light chain 6B OS=Mus musculus GN=Myl6b PE=2 SV=1	K.VVIEFNKDQLEEFR.E	0.00688	99.3167	0
Q8CI43	Myosin light chain 6B OS=Mus musculus GN=Myl6b PE=2 SV=1	R.EAFELFDR.V	0.00551	99.452	0
Q8CI43	Myosin light chain 6B OS=Mus musculus GN=Myl6b PE=2 SV=1	R.ALGQNPTNAEVLK.V	0.00918	99.0904	0
Q8CI43	Myosin light chain 6B OS=Mus musculus GN=Myl6b PE=2 SV=1	R.RVDFETFLPMLQAVAK.N	0.09331	91.4654	0
Q8CI43	Myosin light chain 6B OS=Mus musculus GN=Myl6b PE=2 SV=1	R.RVDFETFLPMLQAVAK.N	0.037	96.432	0
Q8CI43	Myosin light chain 6B OS=Mus musculus GN=Myl6b PE=2 SV=1	R.VDFETFLPMLQAVAK.N	0.00903	99.1051	0
Q8CI43	Myosin light chain 6B OS=Mus musculus GN=Myl6b PE=2 SV=1	R.VDFETFLPMLQAVAK.N	0.02187	97.8598	0
Q8CI43	Myosin light chain 6B OS=Mus musculus GN=Myl6b PE=2 SV=1	R.DQGTYEDYLEGLR.V	0.00928	99.0805	0
Q8CI43	Myosin light chain 6B OS=Mus musculus GN=Myl6b PE=2 SV=1	R.HVLTTLGEK.M	0.01179	98.8347	0
Q3THE2	Myosin regulatory light chain 12B OS=Mus musculus GN=Myl12b PE=1 SV=2	R.ATSNVFAMFDQSQIQEFK.E	0.00059	99.941	0
Q3THE2	Myosin regulatory light chain 12B OS=Mus musculus GN=Myl12b PE=1 SV=2	K.EAFNMIDQNR.D	0.07195	93.2879	0
Q3THE2	Myosin regulatory light chain 12B OS=Mus musculus GN=Myl12b PE=1 SV=2	K.LNGTDPEDVIR.N	0.03849	96.2937	0
Q3THE2	Myosin regulatory light chain 12B OS=Mus musculus GN=Myl12b PE=1 SV=2	R.FTDEEVDELYR.E	0.02907	97.1751	0
Q9CQQ7	ATP synthase F(0) complex subunit B1, mitochondrial OS=Mus musculus GN=Atp5f1 PE=1 SV=1	A.PLPPLPEYGGK.V	0.01528	98.495	0
Q9CQQ7	ATP synthase F(0) complex subunit B1, mitochondrial OS=Mus musculus GN=Atp5f1 PE=1 SV=1	R.LGLIPEEFFQFLYPK.T	0.02865	97.2148	0
Q9CQQ7	ATP synthase F(0) complex subunit B1, mitochondrial OS=Mus musculus GN=Atp5f1 PE=1 SV=1	R.LGLIPEEFFQFLYPK.T	0.07195	93.2879	0
Q9CQQ7	ATP synthase F(0) complex subunit B1, mitochondrial OS=Mus musculus GN=Atp5f1 PE=1 SV=1	K.IAQLEEVK.Q	0.02754	97.3198	0
Q9CQQ7	ATP synthase F(0) complex subunit B1, mitochondrial OS=Mus musculus GN=Atp5f1 PE=1 SV=1	R.HYLFDVQR.N	0.02582	97.483	0
Q9CQQ7	ATP synthase F(0) complex subunit B1, mitochondrial OS=Mus musculus GN=Atp5f1 PE=1 SV=1	K.NRLDYHISVQNMMR.R	0.00555	99.4481	0
Q9CQQ7	ATP synthase F(0) complex subunit B1, mitochondrial OS=Mus musculus GN=Atp5f1 PE=1 SV=1	R.LDYHISVQNMMR.R	0.0173	98.2994	0
Q06185	ATP synthase subunit e, mitochondrial OS=Mus musculus GN=Atp5i PE=1 SV=2	-.MVPPVQVSPLIK.F	0.02152	97.8933	0
Q06185	ATP synthase subunit e, mitochondrial OS=Mus musculus GN=Atp5i PE=1 SV=2	M.VPPVQVSPLIK.F	0.02388	97.6677	0
Q06185	ATP synthase subunit e, mitochondrial OS=Mus musculus GN=Atp5i PE=1 SV=2	R.ELAEAQDDSILK.-	0.02633	97.4345	0
Q9DC69	NADH dehydrogenase [ubiquinone] 1 alpha subcomplex subunit 9, mitochondrial OS=Mus musculus GN=Ndufa9 PE=1 SV=2	R.MGSQVIIPYR.C	0.06571	93.8342	0
Q9DC69	NADH dehydrogenase [ubiquinone] 1 alpha subcomplex subunit 9, mitochondrial OS=Mus musculus GN=Ndufa9 PE=1 SV=2	K.AVQHSNVVINLIGR.E	0.00162	99.8383	0
Q9DC69	NADH dehydrogenase [ubiquinone] 1 alpha subcomplex subunit 9, mitochondrial OS=Mus musculus GN=Ndufa9 PE=1 SV=2	K.AVQHSNVVINLIGR.E	0.00262	99.7387	0
Q9DC69	NADH dehydrogenase [ubiquinone] 1 alpha subcomplex subunit 9, mitochondrial OS=Mus musculus GN=Ndufa9 PE=1 SV=2	R.NFDFEDVFVNIPR.A	0.00916	99.0923	0
Q9DC69	NADH dehydrogenase [ubiquinone] 1 alpha subcomplex subunit 9, mitochondrial OS=Mus musculus GN=Ndufa9 PE=1 SV=2	R.NFDFEDVFVNIPR.A	0.00681	99.3236	0
Q9DC69	NADH dehydrogenase [ubiquinone] 1 alpha subcomplex subunit 9, mitochondrial OS=Mus musculus GN=Ndufa9 PE=1 SV=2	R.FIHVSHLNASMK.S	0.03212	96.888	0
Q9DC69	NADH dehydrogenase [ubiquinone] 1 alpha subcomplex subunit 9, mitochondrial OS=Mus musculus GN=Ndufa9 PE=1 SV=2	R.FIHVSHLNASMK.S	0.00103	99.8971	0
Q9DC69	NADH dehydrogenase [ubiquinone] 1 alpha subcomplex subunit 9, mitochondrial OS=Mus musculus GN=Ndufa9 PE=1 SV=2	R.SVFPEAIIIRPSDIFGR.E	0.02348	97.7059	0
Q9DC69	NADH dehydrogenase [ubiquinone] 1 alpha subcomplex subunit 9, mitochondrial OS=Mus musculus GN=Ndufa9 PE=1 SV=2	R.WFLAVPLVSLGFK.T	0.02087	97.9557	0
Q9DC69	NADH dehydrogenase [ubiquinone] 1 alpha subcomplex subunit 9, mitochondrial OS=Mus musculus GN=Ndufa9 PE=1 SV=2	K.TFAFTGPNR.Y	0.01858	98.1759	0
Q9DC69	NADH dehydrogenase [ubiquinone] 1 alpha subcomplex subunit 9, mitochondrial OS=Mus musculus GN=Ndufa9 PE=1 SV=2	R.IHISDVMPTDLPGLEDLGVQPTPLELK.S	0.02453	97.6057	0
Q9DC69	NADH dehydrogenase [ubiquinone] 1 alpha subcomplex subunit 9, mitochondrial OS=Mus musculus GN=Ndufa9 PE=1 SV=2	R.IHISDVMPTDLPGLEDLGVQPTPLELK.S	0.01643	98.3836	0
Q9DC69	NADH dehydrogenase [ubiquinone] 1 alpha subcomplex subunit 9, mitochondrial OS=Mus musculus GN=Ndufa9 PE=1 SV=2	R.WLSSEIEETKPAK.T	0.0008	99.9201	0
P50544	Very long-chain specific acyl-CoA dehydrogenase, mitochondrial OS=Mus musculus GN=Acadvl PE=1 SV=3	K.SFAVGMFK.G	0.03702	96.4302	0
P50544	Very long-chain specific acyl-CoA dehydrogenase, mitochondrial OS=Mus musculus GN=Acadvl PE=1 SV=3	K.GQLTIDQVFPYPSVLSEEQAQFLK.E	0.06663	93.7532	0
P50544	Very long-chain specific acyl-CoA dehydrogenase, mitochondrial OS=Mus musculus GN=Acadvl PE=1 SV=3	K.ELVGPVAR.F	0.00395	99.6066	0
P50544	Very long-chain specific acyl-CoA dehydrogenase, mitochondrial OS=Mus musculus GN=Acadvl PE=1 SV=3	R.FFEEVNDPAKNDALEK.V	0.01113	98.8993	0
P50544	Very long-chain specific acyl-CoA dehydrogenase, mitochondrial OS=Mus musculus GN=Acadvl PE=1 SV=3	R.FFEEVNDPAKNDALEK.V	0.03031	97.0582	0
P50544	Very long-chain specific acyl-CoA dehydrogenase, mitochondrial OS=Mus musculus GN=Acadvl PE=1 SV=3	R.FFEEVNDPAKNDALEKVEDDTLQGLK.E	0.00928	99.0805	0
P50544	Very long-chain specific acyl-CoA dehydrogenase, mitochondrial OS=Mus musculus GN=Acadvl PE=1 SV=3	K.VEDDTLQGLK.E	0.01374	98.6446	0
P50544	Very long-chain specific acyl-CoA dehydrogenase, mitochondrial OS=Mus musculus GN=Acadvl PE=1 SV=3	K.ELGAFGLQVPSELGGLGLSNTQYAR.L	0.01586	98.4388	0
P50544	Very long-chain specific acyl-CoA dehydrogenase, mitochondrial OS=Mus musculus GN=Acadvl PE=1 SV=3	K.GILLYGTK.A	0.05249	95.0128	0
P50544	Very long-chain specific acyl-CoA dehydrogenase, mitochondrial OS=Mus musculus GN=Acadvl PE=1 SV=3	K.YYTLNGSK.I	0.02289	97.7622	0
P50544	Very long-chain specific acyl-CoA dehydrogenase, mitochondrial OS=Mus musculus GN=Acadvl PE=1 SV=3	K.IWISNGGLADIFTVFAK.T	0.02674	97.3956	0
P50544	Very long-chain specific acyl-CoA dehydrogenase, mitochondrial OS=Mus musculus GN=Acadvl PE=1 SV=3	K.IWISNGGLADIFTVFAK.T	0.01045	98.9658	0
P50544	Very long-chain specific acyl-CoA dehydrogenase, mitochondrial OS=Mus musculus GN=Acadvl PE=1 SV=3	K.ITAFVVER.S	0.00933	99.0756	0
P50544	Very long-chain specific acyl-CoA dehydrogenase, mitochondrial OS=Mus musculus GN=Acadvl PE=1 SV=3	R.SFGGVTHGLPEKK.M	0.00646	99.3581	0
P50544	Very long-chain specific acyl-CoA dehydrogenase, mitochondrial OS=Mus musculus GN=Acadvl PE=1 SV=3	K.VPSENVLGEVGDGFK.V	0.02561	97.5029	0
P50544	Very long-chain specific acyl-CoA dehydrogenase, mitochondrial OS=Mus musculus GN=Acadvl PE=1 SV=3	K.VPSENVLGEVGDGFK.V	0.00727	99.2782	0
P50544	Very long-chain specific acyl-CoA dehydrogenase, mitochondrial OS=Mus musculus GN=Acadvl PE=1 SV=3	K.VAVNILNNGR.F	0.02349	97.7049	0
P50544	Very long-chain specific acyl-CoA dehydrogenase, mitochondrial OS=Mus musculus GN=Acadvl PE=1 SV=3	R.TQFGDKIHNFGVIQEK.L	0.00237	99.7636	0
P50544	Very long-chain specific acyl-CoA dehydrogenase, mitochondrial OS=Mus musculus GN=Acadvl PE=1 SV=3	R.IFEGANDILR.L	0.02471	97.5886	0
P50544	Very long-chain specific acyl-CoA dehydrogenase, mitochondrial OS=Mus musculus GN=Acadvl PE=1 SV=3	K.ELTGLGNALK.N	0.00829	99.1778	0
P50544	Very long-chain specific acyl-CoA dehydrogenase, mitochondrial OS=Mus musculus GN=Acadvl PE=1 SV=3	K.NPFGNVGLLMGEAGK.Q	0.00747	99.2585	0
P50544	Very long-chain specific acyl-CoA dehydrogenase, mitochondrial OS=Mus musculus GN=Acadvl PE=1 SV=3	K.NPFGNVGLLMGEAGK.Q	0.02335	97.7183	0
P50544	Very long-chain specific acyl-CoA dehydrogenase, mitochondrial OS=Mus musculus GN=Acadvl PE=1 SV=3	R.TGIGSGLSLSGIVHPELSR.S	0.01517	98.5057	0
P50544	Very long-chain specific acyl-CoA dehydrogenase, mitochondrial OS=Mus musculus GN=Acadvl PE=1 SV=3	R.ENMASLQSSPQHQELFR.N	0.00176	99.8243	0
P50544	Very long-chain specific acyl-CoA dehydrogenase, mitochondrial OS=Mus musculus GN=Acadvl PE=1 SV=3	R.ENMASLQSSPQHQELFR.N	0.06339	94.0389	0
P62827	GTP-binding nuclear protein Ran OS=Mus musculus GN=Ran PE=1 SV=3	K.LVLVGDGGTGK.T	0.04027	96.1289	0
P62827	GTP-binding nuclear protein Ran OS=Mus musculus GN=Ran PE=1 SV=3	K.YVATLGVEVHPLVFHTNR.G	0.0527	94.9938	0
P62827	GTP-binding nuclear protein Ran OS=Mus musculus GN=Ran PE=1 SV=3	R.GPIKFNVWDTAGQEK.F	0.03664	96.4655	0
P62827	GTP-binding nuclear protein Ran OS=Mus musculus GN=Ran PE=1 SV=3	K.FNVWDTAGQEK.F	0.02768	97.3066	0
P62827	GTP-binding nuclear protein Ran OS=Mus musculus GN=Ran PE=1 SV=3	K.SNYNFEKPFLWLAR.K	0.02543	97.5201	0
P62827	GTP-binding nuclear protein Ran OS=Mus musculus GN=Ran PE=1 SV=3	K.SNYNFEKPFLWLAR.K	0.01373	98.6456	0
Q9D8T7	SRA stem-loop-interacting RNA-binding protein, mitochondrial OS=Mus musculus GN=Slirp PE=1 SV=2	R.KIPWTAAASELR.E	0.00155	99.8452	0
Q9D8T7	SRA stem-loop-interacting RNA-binding protein, mitochondrial OS=Mus musculus GN=Slirp PE=1 SV=2	R.GMGWVQFSSQEELQNALQQEHHIIDGVK.I	0.02332	97.7211	0
Q9D8T7	SRA stem-loop-interacting RNA-binding protein, mitochondrial OS=Mus musculus GN=Slirp PE=1 SV=2	R.GMGWVQFSSQEELQNALQQEHHIIDGVK.I	0.03567	96.5559	0
Q99LC3	NADH dehydrogenase [ubiquinone] 1 alpha subcomplex subunit 10, mitochondrial OS=Mus musculus GN=Ndufa10 PE=1 SV=1	R.YGLLAAILGDK.T	0.01945	98.0921	0
Q99LC3	NADH dehydrogenase [ubiquinone] 1 alpha subcomplex subunit 10, mitochondrial OS=Mus musculus GN=Ndufa10 PE=1 SV=1	R.LQSWLYASR.L	0.02784	97.2914	0
Q99LC3	NADH dehydrogenase [ubiquinone] 1 alpha subcomplex subunit 10, mitochondrial OS=Mus musculus GN=Ndufa10 PE=1 SV=1	R.LLQYADALEHLLSTGQGVVLER.S	0.00319	99.682	0
Q99LC3	NADH dehydrogenase [ubiquinone] 1 alpha subcomplex subunit 10, mitochondrial OS=Mus musculus GN=Ndufa10 PE=1 SV=1	R.LTLPEYLPPHAVIYIDVPVPEVQSR.I	0.01113	98.8993	0
Q99LC3	NADH dehydrogenase [ubiquinone] 1 alpha subcomplex subunit 10, mitochondrial OS=Mus musculus GN=Ndufa10 PE=1 SV=1	K.VTSAYLQDIENAYK.K	0.00901	99.107	0
Q99LC3	NADH dehydrogenase [ubiquinone] 1 alpha subcomplex subunit 10, mitochondrial OS=Mus musculus GN=Ndufa10 PE=1 SV=1	K.VTSAYLQDIENAYKK.T	0.00348	99.6532	0
Q99LC3	NADH dehydrogenase [ubiquinone] 1 alpha subcomplex subunit 10, mitochondrial OS=Mus musculus GN=Ndufa10 PE=1 SV=1	K.VVEDIEYLK.Y	0.01697	98.3313	0
Q99LC3	NADH dehydrogenase [ubiquinone] 1 alpha subcomplex subunit 10, mitochondrial OS=Mus musculus GN=Ndufa10 PE=1 SV=1	K.QDDWTFHYLR.M	0.00828	99.1788	0
Q99LC3	NADH dehydrogenase [ubiquinone] 1 alpha subcomplex subunit 10, mitochondrial OS=Mus musculus GN=Ndufa10 PE=1 SV=1	K.QDDWTFHYLR.M	0.0171	98.3187	0
Q99LC3	NADH dehydrogenase [ubiquinone] 1 alpha subcomplex subunit 10, mitochondrial OS=Mus musculus GN=Ndufa10 PE=1 SV=1	R.MLVQDKTEVLNYTTIPVYLPEITIGAHQGSR.I	0.03117	96.9772	0
Q99LC3	NADH dehydrogenase [ubiquinone] 1 alpha subcomplex subunit 10, mitochondrial OS=Mus musculus GN=Ndufa10 PE=1 SV=1	K.TEVLNYTTIPVYLPEITIGAHQGSR.I	0.00994	99.0158	0
Q9WV55	Vesicle-associated membrane protein-associated protein A OS=Mus musculus GN=Vapa PE=1 SV=2	K.HEQILVLDPPSDLK.F	0.03873	96.2714	0
Q9WV55	Vesicle-associated membrane protein-associated protein A OS=Mus musculus GN=Vapa PE=1 SV=2	K.HEQILVLDPPSDLK.F	0.02599	97.4668	0
Q9WV55	Vesicle-associated membrane protein-associated protein A OS=Mus musculus GN=Vapa PE=1 SV=2	K.FKGPFTDVVTTNLK.L	0.02294	97.7574	0
Q9WV55	Vesicle-associated membrane protein-associated protein A OS=Mus musculus GN=Vapa PE=1 SV=2	K.GPFTDVVTTNLK.L	0.01128	98.8846	0
Q9WV55	Vesicle-associated membrane protein-associated protein A OS=Mus musculus GN=Vapa PE=1 SV=2	K.FMVQTIFAPPNISDMEAVWK.E	0.02183	97.8636	0
Q9WV55	Vesicle-associated membrane protein-associated protein A OS=Mus musculus GN=Vapa PE=1 SV=2	K.EAKPDELMDSK.L	0.00125	99.8752	0
Q9WV55	Vesicle-associated membrane protein-associated protein A OS=Mus musculus GN=Vapa PE=1 SV=2	K.QDGPLPKPHSVSLNDTETR.K	0.01695	98.3333	0
Q9D1P0	39S ribosomal protein L13, mitochondrial OS=Mus musculus GN=Mrpl13 PE=2 SV=1	R.APQQWATFAR.M	0.06443	93.947	0
Q9D1P0	39S ribosomal protein L13, mitochondrial OS=Mus musculus GN=Mrpl13 PE=2 SV=1	K.VYSSHTGYPGGFR.Q	0.02476	97.5838	0
Q9D1P0	39S ribosomal protein L13, mitochondrial OS=Mus musculus GN=Mrpl13 PE=2 SV=1	K.LAIYGMLPK.N	0.0216	97.8857	0
O35295	Transcriptional activator protein Pur-beta OS=Mus musculus GN=Purb PE=1 SV=3	R.GGGGGGGGGPGGFQPAPR.G	6e-05	99.994	0
O35295	Transcriptional activator protein Pur-beta OS=Mus musculus GN=Purb PE=1 SV=3	R.DSLGDFIEHYAQLGPSSPEQLAAGAEEGGGPR.R	0.01408	98.6115	0
O35295	Transcriptional activator protein Pur-beta OS=Mus musculus GN=Purb PE=1 SV=3	R.DSLGDFIEHYAQLGPSSPEQLAAGAEEGGGPR.R	0.05544	94.7472	0
O35295	Transcriptional activator protein Pur-beta OS=Mus musculus GN=Purb PE=1 SV=3	R.GGGGFGGGPGPGGLQSGQTIALPAQGLIEFR.D	0.03685	96.446	0
O35295	Transcriptional activator protein Pur-beta OS=Mus musculus GN=Purb PE=1 SV=3	R.NAITVPFK.A	0.03023	97.0657	0
Q9ERS2	NADH dehydrogenase [ubiquinone] 1 alpha subcomplex subunit 13 OS=Mus musculus GN=Ndufa13 PE=1 SV=3	R.LLIEDLEAR.I	0.0129	98.7264	0
Q9ERS2	NADH dehydrogenase [ubiquinone] 1 alpha subcomplex subunit 13 OS=Mus musculus GN=Ndufa13 PE=1 SV=3	R.IALMPLFQAEK.D	0.00827	99.1798	0
Q9ERS2	NADH dehydrogenase [ubiquinone] 1 alpha subcomplex subunit 13 OS=Mus musculus GN=Ndufa13 PE=1 SV=3	R.ENLEEEAIIMK.D	0.02259	97.7909	0
Q9ERS2	NADH dehydrogenase [ubiquinone] 1 alpha subcomplex subunit 13 OS=Mus musculus GN=Ndufa13 PE=1 SV=3	R.WVPPLIGEMYGLR.T	0.01575	98.4494	0
Q9ERS2	NADH dehydrogenase [ubiquinone] 1 alpha subcomplex subunit 13 OS=Mus musculus GN=Ndufa13 PE=1 SV=3	R.WVPPLIGEMYGLR.T	0.00269	99.7317	0
O35972	39S ribosomal protein L23, mitochondrial OS=Mus musculus GN=Mrpl23 PE=2 SV=1	R.NVLYPLYQLGGPQLR.V	0.02881	97.1997	0
O35972	39S ribosomal protein L23, mitochondrial OS=Mus musculus GN=Mrpl23 PE=2 SV=1	R.NVLYPLYQLGGPQLR.V	0.04473	95.7185	0
O35972	39S ribosomal protein L23, mitochondrial OS=Mus musculus GN=Mrpl23 PE=2 SV=1	R.NYLEQIYNVPVAAVR.T	0.02788	97.2876	0
Q9D051	Pyruvate dehydrogenase E1 component subunit beta, mitochondrial OS=Mus musculus GN=Pdhb PE=1 SV=1	R.EAINQGMDEELER.D	0.00778	99.228	0
Q9D051	Pyruvate dehydrogenase E1 component subunit beta, mitochondrial OS=Mus musculus GN=Pdhb PE=1 SV=1	R.EAINQGMDEELERDEK.V	0.00512	99.4906	0
Q9D051	Pyruvate dehydrogenase E1 component subunit beta, mitochondrial OS=Mus musculus GN=Pdhb PE=1 SV=1	K.VFLLGEEVAQYDGAYK.V	0.01727	98.3023	0
Q9D051	Pyruvate dehydrogenase E1 component subunit beta, mitochondrial OS=Mus musculus GN=Pdhb PE=1 SV=1	K.VFLLGEEVAQYDGAYK.V	0.02421	97.6362	0
Q9D051	Pyruvate dehydrogenase E1 component subunit beta, mitochondrial OS=Mus musculus GN=Pdhb PE=1 SV=1	K.TYYMSAGLQPVPIVFR.G	0.02951	97.1336	0
Q9D051	Pyruvate dehydrogenase E1 component subunit beta, mitochondrial OS=Mus musculus GN=Pdhb PE=1 SV=1	K.TYYMSAGLQPVPIVFR.G	0.0325	96.8523	0
Q9D051	Pyruvate dehydrogenase E1 component subunit beta, mitochondrial OS=Mus musculus GN=Pdhb PE=1 SV=1	K.VVSPWNSEDAK.G	0.02773	97.3018	0
Q9D051	Pyruvate dehydrogenase E1 component subunit beta, mitochondrial OS=Mus musculus GN=Pdhb PE=1 SV=1	K.DFLIPIGK.A	0.01058	98.9531	0
Q9D051	Pyruvate dehydrogenase E1 component subunit beta, mitochondrial OS=Mus musculus GN=Pdhb PE=1 SV=1	R.TIRPMDIEAIEASVMK.T	0.01509	98.5134	0
Q9D051	Pyruvate dehydrogenase E1 component subunit beta, mitochondrial OS=Mus musculus GN=Pdhb PE=1 SV=1	R.IMEGPAFNFLDAPAVR.V	0.01603	98.4223	0
Q9D051	Pyruvate dehydrogenase E1 component subunit beta, mitochondrial OS=Mus musculus GN=Pdhb PE=1 SV=1	R.IMEGPAFNFLDAPAVR.V	0.01421	98.5989	0
Q9D051	Pyruvate dehydrogenase E1 component subunit beta, mitochondrial OS=Mus musculus GN=Pdhb PE=1 SV=1	R.VTGADVPMPYAK.V	0.01153	98.8601	0
Q9D051	Pyruvate dehydrogenase E1 component subunit beta, mitochondrial OS=Mus musculus GN=Pdhb PE=1 SV=1	K.VLEDNSVPQVK.D	0.02164	97.8818	0
Q9D051	Pyruvate dehydrogenase E1 component subunit beta, mitochondrial OS=Mus musculus GN=Pdhb PE=1 SV=1	K.DIIFAVK.K	0.01121	98.8914	0
Q9D051	Pyruvate dehydrogenase E1 component subunit beta, mitochondrial OS=Mus musculus GN=Pdhb PE=1 SV=1	K.DIIFAVKK.T	0.00101	99.8991	0
P24369	Peptidyl-prolyl cis-trans isomerase B OS=Mus musculus GN=Ppib PE=1 SV=2	K.TVDNFVALATGEK.G	0.0109	98.9218	0
P24369	Peptidyl-prolyl cis-trans isomerase B OS=Mus musculus GN=Ppib PE=1 SV=2	R.VIKDFMIQGGDFTR.G	0.00835	99.1719	0
P24369	Peptidyl-prolyl cis-trans isomerase B OS=Mus musculus GN=Ppib PE=1 SV=2	K.DFMIQGGDFTR.G	0.00878	99.1296	0
P24369	Peptidyl-prolyl cis-trans isomerase B OS=Mus musculus GN=Ppib PE=1 SV=2	R.FPDENFK.L	0.00997	99.0128	0
P24369	Peptidyl-prolyl cis-trans isomerase B OS=Mus musculus GN=Ppib PE=1 SV=2	K.HYGPGWVSMANAGK.D	0.02556	97.5077	0
P24369	Peptidyl-prolyl cis-trans isomerase B OS=Mus musculus GN=Ppib PE=1 SV=2	K.DTNGSQFFITTVK.T	0.01673	98.3545	0
P24369	Peptidyl-prolyl cis-trans isomerase B OS=Mus musculus GN=Ppib PE=1 SV=2	R.DKPLKDVIIVDSGK.I	0.00023	99.977	0
P24369	Peptidyl-prolyl cis-trans isomerase B OS=Mus musculus GN=Ppib PE=1 SV=2	K.IEVEKPFAIAKE.-	0.00393	99.6085	0
Q9QXS1	Plectin OS=Mus musculus GN=Plec PE=1 SV=3	M.VAGMLMPLDR.L	0.0182	98.2125	0
Q9QXS1	Plectin OS=Mus musculus GN=Plec PE=1 SV=3	K.LLLWSQR.M	0.00684	99.3206	0
Q9QXS1	Plectin OS=Mus musculus GN=Plec PE=1 SV=3	R.MVEGYQGLR.C	0.03045	97.045	0
Q9QXS1	Plectin OS=Mus musculus GN=Plec PE=1 SV=3	R.QTNLENLDQAFSVAER.D	0.00146	99.8542	0
Q9QXS1	Plectin OS=Mus musculus GN=Plec PE=1 SV=3	R.QTNLENLDQAFSVAER.D	0.0111	98.9022	0
Q9QXS1	Plectin OS=Mus musculus GN=Plec PE=1 SV=3	R.LLDPEDVDVPQPDEK.S	0.01977	98.0613	0
Q9QXS1	Plectin OS=Mus musculus GN=Plec PE=1 SV=3	K.SIITYVSSLYDAMPR.V	0.01312	98.705	0
Q9QXS1	Plectin OS=Mus musculus GN=Plec PE=1 SV=3	K.SIITYVSSLYDAMPR.V	0.03263	96.8401	0
Q9QXS1	Plectin OS=Mus musculus GN=Plec PE=1 SV=3	R.SKVIYQSLEGAVQAGQLK.I	0.04903	95.3262	0
Q9QXS1	Plectin OS=Mus musculus GN=Plec PE=1 SV=3	K.VIYQSLEGAVQAGQLK.I	0.00292	99.7089	0
Q9QXS1	Plectin OS=Mus musculus GN=Plec PE=1 SV=3	K.VIYQSLEGAVQAGQLK.I	0.00262	99.7387	0
Q9QXS1	Plectin OS=Mus musculus GN=Plec PE=1 SV=3	K.IPPGYHPLDVEKEWGK.L	0.01159	98.8543	0
Q9QXS1	Plectin OS=Mus musculus GN=Plec PE=1 SV=3	R.DLDKADGMIR.L	0.05682	94.6235	0
Q9QXS1	Plectin OS=Mus musculus GN=Plec PE=1 SV=3	K.AGVGAPVTQVTLQSTQR.R	0.00423	99.5788	0
Q9QXS1	Plectin OS=Mus musculus GN=Plec PE=1 SV=3	R.YLQDLLAWVEENQR.R	0.00344	99.6572	0
Q9QXS1	Plectin OS=Mus musculus GN=Plec PE=1 SV=3	R.YLQDLLAWVEENQR.R	0.00861	99.1463	0
Q9QXS1	Plectin OS=Mus musculus GN=Plec PE=1 SV=3	R.IDSAEWGVDLPSVEAQLGSHR.G	0.01791	98.2405	0
Q9QXS1	Plectin OS=Mus musculus GN=Plec PE=1 SV=3	R.GMHQSIEEFR.A	0.00538	99.4649	0
Q9QXS1	Plectin OS=Mus musculus GN=Plec PE=1 SV=3	R.GMHQSIEEFR.A	0.00933	99.0756	0
Q9QXS1	Plectin OS=Mus musculus GN=Plec PE=1 SV=3	R.LDLQYAK.L	0.01082	98.9296	0
Q9QXS1	Plectin OS=Mus musculus GN=Plec PE=1 SV=3	R.SLESLHGFVAAATK.E	0.02837	97.2413	0
Q9QXS1	Plectin OS=Mus musculus GN=Plec PE=1 SV=3	R.SLESLHGFVAAATK.E	0.03224	96.8767	0
Q9QXS1	Plectin OS=Mus musculus GN=Plec PE=1 SV=3	R.LEDLLQDAQDEKEQLNEYK.G	0.00909	99.0992	0
Q9QXS1	Plectin OS=Mus musculus GN=Plec PE=1 SV=3	R.LEAQHQALVTLWHQLHVDMK.S	0.05282	94.983	0
Q9QXS1	Plectin OS=Mus musculus GN=Plec PE=1 SV=3	K.SLLAWQSLSR.D	0.02291	97.7603	0
Q9QXS1	Plectin OS=Mus musculus GN=Plec PE=1 SV=3	R.DSQDAGGFGPEDR.L	0.00438	99.5639	0
Q9QXS1	Plectin OS=Mus musculus GN=Plec PE=1 SV=3	R.HYQQLLQSLEQGEQEESR.C	0.08448	92.2101	0
Q9QXS1	Plectin OS=Mus musculus GN=Plec PE=1 SV=3	K.VLALPEPSPAAPTLR.S	0.00753	99.2526	0
Q9QXS1	Plectin OS=Mus musculus GN=Plec PE=1 SV=3	R.SELELTLGK.L	0.00971	99.0383	0
Q9QXS1	Plectin OS=Mus musculus GN=Plec PE=1 SV=3	R.SELELTLGKLEQVR.S	0.00255	99.7456	0
Q9QXS1	Plectin OS=Mus musculus GN=Plec PE=1 SV=3	R.SLSAIYLEK.L	0.01578	98.4465	0
Q9QXS1	Plectin OS=Mus musculus GN=Plec PE=1 SV=3	K.EAQAVPATLQELEATK.A	0.01501	98.5212	0
Q9QXS1	Plectin OS=Mus musculus GN=Plec PE=1 SV=3	R.AQAEAQQPVFNTLR.D	0.01075	98.9364	0
Q9QXS1	Plectin OS=Mus musculus GN=Plec PE=1 SV=3	R.VTQLLER.W	0.04107	96.055	0
Q9QXS1	Plectin OS=Mus musculus GN=Plec PE=1 SV=3	R.WQAVLAQTDVR.Q	0.04168	95.9988	0
Q9QXS1	Plectin OS=Mus musculus GN=Plec PE=1 SV=3	K.QYINAIKDYELQLITYK.A	0.01967	98.0709	0
Q9QXS1	Plectin OS=Mus musculus GN=Plec PE=1 SV=3	K.AQLEPVASPAK.K	0.01465	98.5562	0
Q9QXS1	Plectin OS=Mus musculus GN=Plec PE=1 SV=3	K.VQSGSESVIQEYVDLR.T	0.02437	97.621	0
Q9QXS1	Plectin OS=Mus musculus GN=Plec PE=1 SV=3	K.AQAELEAQELQR.R	0.04134	96.0301	0
Q9QXS1	Plectin OS=Mus musculus GN=Plec PE=1 SV=3	R.GGAEGELQALR.A	0.00897	99.111	0
Q9QXS1	Plectin OS=Mus musculus GN=Plec PE=1 SV=3	R.QAEAELALR.V	0.06788	93.6435	0
Q9QXS1	Plectin OS=Mus musculus GN=Plec PE=1 SV=3	R.ALQALDELR.L	0.0311	96.9838	0
Q9QXS1	Plectin OS=Mus musculus GN=Plec PE=1 SV=3	R.QVQVALETAQR.S	0.00911	99.0972	0
Q9QXS1	Plectin OS=Mus musculus GN=Plec PE=1 SV=3	R.TLQEEHVTVAQLR.E	0.00631	99.373	0
Q9QXS1	Plectin OS=Mus musculus GN=Plec PE=1 SV=3	R.LQAEEVAQQK.S	0.01393	98.6261	0
Q9QXS1	Plectin OS=Mus musculus GN=Plec PE=1 SV=3	R.LAAEQELIR.L	0.03883	96.2621	0
Q9QXS1	Plectin OS=Mus musculus GN=Plec PE=1 SV=3	R.QLLEEELAR.L	0.00854	99.1532	0
Q9QXS1	Plectin OS=Mus musculus GN=Plec PE=1 SV=3	K.RQELEAELAK.V	0.00492	99.5104	0
Q9QXS1	Plectin OS=Mus musculus GN=Plec PE=1 SV=3	R.LAEDEAFQR.R	0.02083	97.9595	0
Q9QXS1	Plectin OS=Mus musculus GN=Plec PE=1 SV=3	R.RLEEQAALHK.A	0.00521	99.4817	0
Q9QXS1	Plectin OS=Mus musculus GN=Plec PE=1 SV=3	K.VALEEVER.L	0.03582	96.5419	0
Q9QXS1	Plectin OS=Mus musculus GN=Plec PE=1 SV=3	R.QLQLAQEAAQK.R	0.0105	98.9609	0
Q9QXS1	Plectin OS=Mus musculus GN=Plec PE=1 SV=3	R.QLQLAQEAAQKR.L	0.0054	99.4629	0
Q9QXS1	Plectin OS=Mus musculus GN=Plec PE=1 SV=3	R.QLQLAQEAAQKR.L	0.11045	90.0536	0
Q9QXS1	Plectin OS=Mus musculus GN=Plec PE=1 SV=3	K.AHAFVVQQR.E	0.00613	99.3907	0
Q9QXS1	Plectin OS=Mus musculus GN=Plec PE=1 SV=3	R.EEELQQTLQQEQNMLDR.L	0.00241	99.7596	0
Q9QXS1	Plectin OS=Mus musculus GN=Plec PE=1 SV=3	R.EEELQQTLQQEQNMLDR.L	0.00507	99.4956	0
Q9QXS1	Plectin OS=Mus musculus GN=Plec PE=1 SV=3	R.LKQSAEEQAQAQAQAQAAAEK.L	14.385	6.49982	0
Q9QXS1	Plectin OS=Mus musculus GN=Plec PE=1 SV=3	R.LKQSAEEQAQAQAQAQAAAEK.L	0.02201	97.8464	0
Q9QXS1	Plectin OS=Mus musculus GN=Plec PE=1 SV=3	K.QSAEEQAQAQAQAQAAAEK.L	0.00653	99.3512	0
Q9QXS1	Plectin OS=Mus musculus GN=Plec PE=1 SV=3	K.QSAEEQAQAQAQAQAAAEK.L	0.03996	96.1575	0
Q9QXS1	Plectin OS=Mus musculus GN=Plec PE=1 SV=3	K.AQVEQELTTLR.L	0.01543	98.4804	0
Q9QXS1	Plectin OS=Mus musculus GN=Plec PE=1 SV=3	R.LKAEVTEAAR.Q	0.00392	99.6095	0
Q9QXS1	Plectin OS=Mus musculus GN=Plec PE=1 SV=3	R.SQVEEELFSVR.V	0.02183	97.8636	0
Q9QXS1	Plectin OS=Mus musculus GN=Plec PE=1 SV=3	R.FLEEEAEK.M	0.00637	99.367	0
Q9QXS1	Plectin OS=Mus musculus GN=Plec PE=1 SV=3	R.QLAEEDLAQQR.A	0.00555	99.4481	0
Q9QXS1	Plectin OS=Mus musculus GN=Plec PE=1 SV=3	R.LQEDKEQMAQQLVEETQGFQR.T	0.06874	93.5681	0
Q9QXS1	Plectin OS=Mus musculus GN=Plec PE=1 SV=3	R.LREAIAELER.E	0.02691	97.3795	0
Q9QXS1	Plectin OS=Mus musculus GN=Plec PE=1 SV=3	K.SEEMQTVQQEQILQETQALQK.S	0.0055	99.453	0
Q9QXS1	Plectin OS=Mus musculus GN=Plec PE=1 SV=3	K.SEEMQTVQQEQILQETQALQK.S	0.3937	71.7515	0
Q9QXS1	Plectin OS=Mus musculus GN=Plec PE=1 SV=3	K.AKLEQLFQDEVAK.A	0.01249	98.7664	0
Q9QXS1	Plectin OS=Mus musculus GN=Plec PE=1 SV=3	K.LEQLFQDEVAK.A	0.02251	97.7986	0
Q9QXS1	Plectin OS=Mus musculus GN=Plec PE=1 SV=3	K.QELMASMEEAR.R	0.0105	98.9609	0
Q9QXS1	Plectin OS=Mus musculus GN=Plec PE=1 SV=3	R.KQEELQHLEQQR.Q	0.00118	99.8821	0
Q9QXS1	Plectin OS=Mus musculus GN=Plec PE=1 SV=3	R.AALAHSEIATTQAASTK.A	0.01178	98.8357	0
Q9QXS1	Plectin OS=Mus musculus GN=Plec PE=1 SV=3	R.DAPDGPSVEAEPEYTFEGLR.Q	0.00286	99.7148	0
Q9QXS1	Plectin OS=Mus musculus GN=Plec PE=1 SV=3	R.DAPDGPSVEAEPEYTFEGLR.Q	0.01023	98.9874	0
Q9QXS1	Plectin OS=Mus musculus GN=Plec PE=1 SV=3	K.VPAQQLQEAGILSQEELQR.L	0.00752	99.2536	0
Q9QXS1	Plectin OS=Mus musculus GN=Plec PE=1 SV=3	R.LAQGHTTVAELTQR.E	0.00443	99.559	0
Q9QXS1	Plectin OS=Mus musculus GN=Plec PE=1 SV=3	R.LTVNEAVK.E	0.01006	99.004	0
Q9QXS1	Plectin OS=Mus musculus GN=Plec PE=1 SV=3	K.DPYTGEQISLFQAMK.K	0.07694	92.8557	0
Q9QXS1	Plectin OS=Mus musculus GN=Plec PE=1 SV=3	R.GYFDEEMNR.I	0.00797	99.2093	0
Q9QXS1	Plectin OS=Mus musculus GN=Plec PE=1 SV=3	R.TVTIWEIINSEYFTAEQR.R	0.16024	86.1891	0
Q9QXS1	Plectin OS=Mus musculus GN=Plec PE=1 SV=3	R.TVTIWEIINSEYFTAEQR.R	0.09767	91.1021	0
Q9QXS1	Plectin OS=Mus musculus GN=Plec PE=1 SV=3	R.DLLQQFR.T	0.01746	98.284	0
Q9QXS1	Plectin OS=Mus musculus GN=Plec PE=1 SV=3	K.IVITVVEEHER.K	0.0029	99.7108	0
Q9QXS1	Plectin OS=Mus musculus GN=Plec PE=1 SV=3	K.DLLQPEVAVALLEAQAGTGHIIDPATSAR.L	0.09327	91.4687	0
Q9QXS1	Plectin OS=Mus musculus GN=Plec PE=1 SV=3	K.DLLQPEVAVALLEAQAGTGHIIDPATSAR.L	0.06907	93.5392	0
Q9QXS1	Plectin OS=Mus musculus GN=Plec PE=1 SV=3	R.LTVDEAVR.A	0.09276	91.5114	0
Q9QXS1	Plectin OS=Mus musculus GN=Plec PE=1 SV=3	K.SHRVPLDVAYAR.G	0.02823	97.2545	0
Q9QXS1	Plectin OS=Mus musculus GN=Plec PE=1 SV=3	R.VPLDVAYAR.G	0.00793	99.2132	0
Q9QXS1	Plectin OS=Mus musculus GN=Plec PE=1 SV=3	R.VYHDPSTQEPVTYSQLQQR.C	0.00125	99.8752	0
Q9QXS1	Plectin OS=Mus musculus GN=Plec PE=1 SV=3	R.SDQLTGLSLLPLSEK.A	0.01435	98.5853	0
Q9QXS1	Plectin OS=Mus musculus GN=Plec PE=1 SV=3	R.SDQLTGLSLLPLSEK.A	0.03667	96.4627	0
Q9QXS1	Plectin OS=Mus musculus GN=Plec PE=1 SV=3	R.ARQEEVYSELQAR.E	0.00165	99.8353	0
Q9QXS1	Plectin OS=Mus musculus GN=Plec PE=1 SV=3	K.VEVPVGSFK.G	0.01306	98.7108	0
Q9QXS1	Plectin OS=Mus musculus GN=Plec PE=1 SV=3	R.APVPASELLDAK.I	0.00766	99.2398	0
Q9QXS1	Plectin OS=Mus musculus GN=Plec PE=1 SV=3	K.VTIYEAMR.R	0.03042	97.0478	0
Q9QXS1	Plectin OS=Mus musculus GN=Plec PE=1 SV=3	R.LYVHEAVK.A	0.00949	99.0599	0
Q9QXS1	Plectin OS=Mus musculus GN=Plec PE=1 SV=3	K.AVTGYKDPYSGNTISLFQAMK.K	0.10057	90.862	0
Q9QXS1	Plectin OS=Mus musculus GN=Plec PE=1 SV=3	R.LLEAQVATGGIIDPVHSHR.L	0.00627	99.3769	0
Q9QXS1	Plectin OS=Mus musculus GN=Plec PE=1 SV=3	R.LPVDVAYQR.G	0.05918	94.4127	0
Q9QXS1	Plectin OS=Mus musculus GN=Plec PE=1 SV=3	R.IISLETYNLFR.E	0.01074	98.9374	0
Q9QXS1	Plectin OS=Mus musculus GN=Plec PE=1 SV=3	R.EVLEMESAWR.Y	0.01595	98.43	0
Q9QXS1	Plectin OS=Mus musculus GN=Plec PE=1 SV=3	R.YLYGTGAVAGVYLPGSR.Q	0.00193	99.8074	0
Q9QXS1	Plectin OS=Mus musculus GN=Plec PE=1 SV=3	K.ELIPAEEALR.L	0.05125	95.1249	0
Q9QXS1	Plectin OS=Mus musculus GN=Plec PE=1 SV=3	R.LGFHLPLEVAYQR.G	0.04137	96.0273	0
Q9QXS1	Plectin OS=Mus musculus GN=Plec PE=1 SV=3	R.LGFHLPLEVAYQR.G	0.0094	99.0688	0
Q9QXS1	Plectin OS=Mus musculus GN=Plec PE=1 SV=3	R.GYLNKDTHDQLSEPSEVR.S	0.02967	97.1185	0
Q9QXS1	Plectin OS=Mus musculus GN=Plec PE=1 SV=3	K.DTHDQLSEPSEVR.S	0.00606	99.3977	0
Q9QXS1	Plectin OS=Mus musculus GN=Plec PE=1 SV=3	R.LSYTQLLK.R	0.08931	91.8012	0
Q9QXS1	Plectin OS=Mus musculus GN=Plec PE=1 SV=3	R.RDDPSGQMLLLLSDAR.K	0.01485	98.5367	0
Q9QXS1	Plectin OS=Mus musculus GN=Plec PE=1 SV=3	R.DDPSGQMLLLLSDAR.K	0.0065	99.3542	0
Q9QXS1	Plectin OS=Mus musculus GN=Plec PE=1 SV=3	R.KQITVEELVR.S	0.0056	99.4431	0
Q9QXS1	Plectin OS=Mus musculus GN=Plec PE=1 SV=3	R.SQVMDEATALQLQEGLTSIEEVTK.N	0.07582	92.9524	0
Q9QXS1	Plectin OS=Mus musculus GN=Plec PE=1 SV=3	R.LSVYQAMK.K	0.10339	90.6298	0
Q9QXS1	Plectin OS=Mus musculus GN=Plec PE=1 SV=3	K.LISLFQAMK.K	0.01056	98.955	0
Q9QXS1	Plectin OS=Mus musculus GN=Plec PE=1 SV=3	R.GLFDEEMNEILTDPSDDTK.G	0.00211	99.7894	0
Q9QXS1	Plectin OS=Mus musculus GN=Plec PE=1 SV=3	K.GFFDPNTEENLTYLQLMER.C	0.00492	99.5104	0
Q9QXS1	Plectin OS=Mus musculus GN=Plec PE=1 SV=3	K.GFFDPNTEENLTYLQLMER.C	0.00742	99.2635	0
Q9QXS1	Plectin OS=Mus musculus GN=Plec PE=1 SV=3	R.AGTLSITEFADMLSGNAGGFR.S	0.0185	98.1836	0
Q9QXS1	Plectin OS=Mus musculus GN=Plec PE=1 SV=3	R.AGTLSITEFADMLSGNAGGFR.S	0.01781	98.2502	0
Q9QXS1	Plectin OS=Mus musculus GN=Plec PE=1 SV=3	R.SSSVGSSSSYPISSAGPR.T	0.00589	99.4144	0
Q9QXS1	Plectin OS=Mus musculus GN=Plec PE=1 SV=3	R.TQLASWSDPTEETGPVAGILDTETLEK.V	0.01168	98.8455	0
Q9QXS1	Plectin OS=Mus musculus GN=Plec PE=1 SV=3	K.VSITEAMHR.N	0.05821	94.4992	0
Q9QXS1	Plectin OS=Mus musculus GN=Plec PE=1 SV=3	R.FPVTEAVNK.G	0.01054	98.957	0
Q9QXS1	Plectin OS=Mus musculus GN=Plec PE=1 SV=3	K.GWLYYEAGQR.F	0.00556	99.4471	0
Q9QXS1	Plectin OS=Mus musculus GN=Plec PE=1 SV=3	R.FLEVQYLTGGLIEPDTPGR.V	0.06735	93.69	0
Q9QXS1	Plectin OS=Mus musculus GN=Plec PE=1 SV=3	R.VSLDEALQR.G	0.01846	98.1875	0
Q9QXS1	Plectin OS=Mus musculus GN=Plec PE=1 SV=3	R.SMVEEGTGLR.L	0.06238	94.1283	0
Q9QXS1	Plectin OS=Mus musculus GN=Plec PE=1 SV=3	K.GYYSPYSVSGSGSTAGSR.T	0.00814	99.1926	0
P15532	Nucleoside diphosphate kinase A OS=Mus musculus GN=Nme1 PE=1 SV=1	R.TFIAIKPDGVQR.G	0.00633	99.371	0
P15532	Nucleoside diphosphate kinase A OS=Mus musculus GN=Nme1 PE=1 SV=1	R.GLVGEIIKR.F	0.00319	99.682	0
Q8BMD8	Calcium-binding mitochondrial carrier protein SCaMC-1 OS=Mus musculus GN=Slc25a24 PE=1 SV=1	R.NGDGVVDIGELQQGLQSLGIPLGQDAEEK.I	0.00864	99.1434	0
Q8BMD8	Calcium-binding mitochondrial carrier protein SCaMC-1 OS=Mus musculus GN=Slc25a24 PE=1 SV=1	R.DYFLFNPVTDIEEIIR.F	0.03651	96.4776	0
Q8BMD8	Calcium-binding mitochondrial carrier protein SCaMC-1 OS=Mus musculus GN=Slc25a24 PE=1 SV=1	R.QLLAGGVAGAVSR.T	0.01184	98.8299	0
Q8BMD8	Calcium-binding mitochondrial carrier protein SCaMC-1 OS=Mus musculus GN=Slc25a24 PE=1 SV=1	K.VMMQVHGSK.S	0.04421	95.7662	0
Q8BMD8	Calcium-binding mitochondrial carrier protein SCaMC-1 OS=Mus musculus GN=Slc25a24 PE=1 SV=1	K.SMNIFGGFR.Q	0.01994	98.045	0
Q8BMD8	Calcium-binding mitochondrial carrier protein SCaMC-1 OS=Mus musculus GN=Slc25a24 PE=1 SV=1	K.FWAYEQYKK.L	0.00315	99.686	0
Q8BMD8	Calcium-binding mitochondrial carrier protein SCaMC-1 OS=Mus musculus GN=Slc25a24 PE=1 SV=1	R.FISGSMAGATAQTFIYPMEVLK.T	0.01765	98.2656	0
Q8BMD8	Calcium-binding mitochondrial carrier protein SCaMC-1 OS=Mus musculus GN=Slc25a24 PE=1 SV=1	R.FISGSMAGATAQTFIYPMEVLK.T	0.03356	96.753	0
Q8BMD8	Calcium-binding mitochondrial carrier protein SCaMC-1 OS=Mus musculus GN=Slc25a24 PE=1 SV=1	K.HEGFGAFYK.G	0.01491	98.5309	0
Q8BMD8	Calcium-binding mitochondrial carrier protein SCaMC-1 OS=Mus musculus GN=Slc25a24 PE=1 SV=1	K.EGVSGLYR.G	0.01399	98.6203	0
Q8BMD8	Calcium-binding mitochondrial carrier protein SCaMC-1 OS=Mus musculus GN=Slc25a24 PE=1 SV=1	K.VLPAVGISYVVYENMK.Q	0.02566	97.4982	0
Q8BMD8	Calcium-binding mitochondrial carrier protein SCaMC-1 OS=Mus musculus GN=Slc25a24 PE=1 SV=1	K.VLPAVGISYVVYENMK.Q	0.02136	97.9087	0
Q60715	Prolyl 4-hydroxylase subunit alpha-1 OS=Mus musculus GN=P4ha1 PE=2 SV=2	A.HPGFFTSIGQMTDLIHNEKDLVTSLK.D	0.05153	95.0995	0
Q60715	Prolyl 4-hydroxylase subunit alpha-1 OS=Mus musculus GN=P4ha1 PE=2 SV=2	K.DLVTSLKDYIK.A	0.0423	95.9417	0
Q60715	Prolyl 4-hydroxylase subunit alpha-1 OS=Mus musculus GN=P4ha1 PE=2 SV=2	R.LTSTATKDPEGFVGHPVNAFK.L	0.03745	96.3902	0
Q60715	Prolyl 4-hydroxylase subunit alpha-1 OS=Mus musculus GN=P4ha1 PE=2 SV=2	K.DPEGFVGHPVNAFK.L	0.03006	97.0817	0
Q60715	Prolyl 4-hydroxylase subunit alpha-1 OS=Mus musculus GN=P4ha1 PE=2 SV=2	K.DPEGFVGHPVNAFK.L	0.01478	98.5435	0
Q60715	Prolyl 4-hydroxylase subunit alpha-1 OS=Mus musculus GN=P4ha1 PE=2 SV=2	K.RLNTEWSELENLILK.D	0.00567	99.4362	0
Q60715	Prolyl 4-hydroxylase subunit alpha-1 OS=Mus musculus GN=P4ha1 PE=2 SV=2	R.QYFPNDEDQVGAAK.A	0.01003	99.007	0
Q60715	Prolyl 4-hydroxylase subunit alpha-1 OS=Mus musculus GN=P4ha1 PE=2 SV=2	R.LQDTYNLDTNTISK.G	0.01603	98.4223	0
Q60715	Prolyl 4-hydroxylase subunit alpha-1 OS=Mus musculus GN=P4ha1 PE=2 SV=2	K.VAYTEADYYHTELWMEQALTQLEEGELSTVDK.V	0.13813	87.8634	0
Q60715	Prolyl 4-hydroxylase subunit alpha-1 OS=Mus musculus GN=P4ha1 PE=2 SV=2	K.VAYTEADYYHTELWMEQALTQLEEGELSTVDK.V	0.12524	88.8699	0
Q60715	Prolyl 4-hydroxylase subunit alpha-1 OS=Mus musculus GN=P4ha1 PE=2 SV=2	K.LLELDPEHQR.A	0.00483	99.5193	0
Q60715	Prolyl 4-hydroxylase subunit alpha-1 OS=Mus musculus GN=P4ha1 PE=2 SV=2	K.LLELDPEHQR.A	0.00555	99.4481	0
Q60715	Prolyl 4-hydroxylase subunit alpha-1 OS=Mus musculus GN=P4ha1 PE=2 SV=2	R.ANGNLVYFEYIMSK.E	0.01192	98.822	0
Q60715	Prolyl 4-hydroxylase subunit alpha-1 OS=Mus musculus GN=P4ha1 PE=2 SV=2	K.GIAVDYLPER.Q	0.01673	98.3545	0
Q60715	Prolyl 4-hydroxylase subunit alpha-1 OS=Mus musculus GN=P4ha1 PE=2 SV=2	R.FHDIISDAEIEIVK.D	0.62816	61.419	0
Q60715	Prolyl 4-hydroxylase subunit alpha-1 OS=Mus musculus GN=P4ha1 PE=2 SV=2	R.FHDIISDAEIEIVK.D	0.00632	99.372	0
Q60715	Prolyl 4-hydroxylase subunit alpha-1 OS=Mus musculus GN=P4ha1 PE=2 SV=2	K.SAWLSGYEDPVVSR.I	0.00454	99.5481	0
P68368	Tubulin alpha-4A chain OS=Mus musculus GN=Tuba4a PE=1 SV=1	R.AVFVDLEPTVIDEIR.N	0.1963	83.5911	0
P68368	Tubulin alpha-4A chain OS=Mus musculus GN=Tuba4a PE=1 SV=1	R.AVFVDLEPTVIDEIR.N	0.05714	94.5949	0
P68368	Tubulin alpha-4A chain OS=Mus musculus GN=Tuba4a PE=1 SV=1	R.QLFHPEQLITGK.E	0.08019	92.5763	0
P68368	Tubulin alpha-4A chain OS=Mus musculus GN=Tuba4a PE=1 SV=1	R.QLFHPEQLITGK.E	0.02032	98.0085	0
P68368	Tubulin alpha-4A chain OS=Mus musculus GN=Tuba4a PE=1 SV=1	R.QLFHPEQLITGKEDAANNYAR.G	0.05538	94.7526	0
P68368	Tubulin alpha-4A chain OS=Mus musculus GN=Tuba4a PE=1 SV=1	F.GGGTGSGFTSLLMER.L	0.03382	96.7286	0
P68368	Tubulin alpha-4A chain OS=Mus musculus GN=Tuba4a PE=1 SV=1	R.NLDIERPTYTNLNR.L	0.00457	99.5451	0
P68368	Tubulin alpha-4A chain OS=Mus musculus GN=Tuba4a PE=1 SV=1	R.IHFPLATYAPVISAEK.A	0.02819	97.2583	0
P68368	Tubulin alpha-4A chain OS=Mus musculus GN=Tuba4a PE=1 SV=1	K.VGINYQPPTVVPGGDLAK.V	0.0267	97.3994	0
P68368	Tubulin alpha-4A chain OS=Mus musculus GN=Tuba4a PE=1 SV=1	K.VGINYQPPTVVPGGDLAK.V	0.03709	96.4236	0
P68368	Tubulin alpha-4A chain OS=Mus musculus GN=Tuba4a PE=1 SV=1	R.LDHKFDLMYAK.R	0.00843	99.164	0
P68368	Tubulin alpha-4A chain OS=Mus musculus GN=Tuba4a PE=1 SV=1	R.LDHKFDLMYAK.R	0.00551	99.452	0
P68368	Tubulin alpha-4A chain OS=Mus musculus GN=Tuba4a PE=1 SV=1	K.FDLMYAK.R	0.02812	97.2649	0
P12815	Programmed cell death protein 6 OS=Mus musculus GN=Pdcd6 PE=1 SV=2	R.SGVISDNELQQALSNGTWTPFNPVTVR.S	0.016	98.4252	0
P12815	Programmed cell death protein 6 OS=Mus musculus GN=Pdcd6 PE=1 SV=2	K.AGVNFSEFTGVWK.Y	0.03331	96.7764	0
P12815	Programmed cell death protein 6 OS=Mus musculus GN=Pdcd6 PE=1 SV=2	K.YITDWQNVFR.T	0.26234	79.218	0
P62806	Histone H4 OS=Mus musculus GN=Hist1h4a PE=1 SV=2	R.DNIQGITKPAIR.R	0.00789	99.2172	0
P62806	Histone H4 OS=Mus musculus GN=Hist1h4a PE=1 SV=2	R.DNIQGITKPAIR.R	0.05549	94.7427	0
P62806	Histone H4 OS=Mus musculus GN=Hist1h4a PE=1 SV=2	K.RISGLIYEETR.G	0.0047	99.5322	0
P62806	Histone H4 OS=Mus musculus GN=Hist1h4a PE=1 SV=2	R.ISGLIYEETR.G	0.03143	96.9528	0
P62806	Histone H4 OS=Mus musculus GN=Hist1h4a PE=1 SV=2	K.VFLENVIR.D	0.02864	97.2157	0
P62806	Histone H4 OS=Mus musculus GN=Hist1h4a PE=1 SV=2	K.VFLENVIRDAVTYTEHAK.R	0.01201	98.8133	0
P62806	Histone H4 OS=Mus musculus GN=Hist1h4a PE=1 SV=2	K.VFLENVIRDAVTYTEHAK.R	0.0109	98.9218	0
P62806	Histone H4 OS=Mus musculus GN=Hist1h4a PE=1 SV=2	R.KTVTAMDVVYALK.R	0.02073	97.9691	0
P62806	Histone H4 OS=Mus musculus GN=Hist1h4a PE=1 SV=2	R.KTVTAMDVVYALKR.Q	0.04957	95.2771	0
P62806	Histone H4 OS=Mus musculus GN=Hist1h4a PE=1 SV=2	K.TVTAMDVVYALK.R	0.05927	94.4046	0
Q91VC3	Eukaryotic initiation factor 4A-III OS=Mus musculus GN=Eif4a3 PE=2 SV=3	R.ETQALILAPTR.E	0.01635	98.3913	0
Q91VC3	Eukaryotic initiation factor 4A-III OS=Mus musculus GN=Eif4a3 PE=2 SV=3	R.ELAVQIQK.G	0.05012	95.2272	0
Q91VC3	Eukaryotic initiation factor 4A-III OS=Mus musculus GN=Eif4a3 PE=2 SV=3	R.KLDYGQHVVAGTPGR.V	0.00437	99.5649	0
Q91VC3	Eukaryotic initiation factor 4A-III OS=Mus musculus GN=Eif4a3 PE=2 SV=3	R.KLDYGQHVVAGTPGR.V	0.01561	98.463	0
Q91VC3	Eukaryotic initiation factor 4A-III OS=Mus musculus GN=Eif4a3 PE=2 SV=3	K.MLVLDEADEMLNK.G	0.02454	97.6048	0
Q91VC3	Eukaryotic initiation factor 4A-III OS=Mus musculus GN=Eif4a3 PE=2 SV=3	K.GFKEQIYDVYR.Y	0.01068	98.9433	0
Q91VC3	Eukaryotic initiation factor 4A-III OS=Mus musculus GN=Eif4a3 PE=2 SV=3	K.RDELTLEGIK.Q	0.01052	98.959	0
Q91VC3	Eukaryotic initiation factor 4A-III OS=Mus musculus GN=Eif4a3 PE=2 SV=3	R.KVDWLTEK.M	0.03264	96.8392	0
Q91VC3	Eukaryotic initiation factor 4A-III OS=Mus musculus GN=Eif4a3 PE=2 SV=3	R.EANFTVSSMHGDMPQK.E	0.00257	99.7437	0
Q91VC3	Eukaryotic initiation factor 4A-III OS=Mus musculus GN=Eif4a3 PE=2 SV=3	R.EANFTVSSMHGDMPQK.E	0.00388	99.6135	0
Q91VC3	Eukaryotic initiation factor 4A-III OS=Mus musculus GN=Eif4a3 PE=2 SV=3	R.EANFTVSSMHGDMPQKER.E	0.003	99.7009	0
Q91VC3	Eukaryotic initiation factor 4A-III OS=Mus musculus GN=Eif4a3 PE=2 SV=3	R.GLDVPQVSLIINYDLPNNR.E	0.00864	99.1434	0
Q91VC3	Eukaryotic initiation factor 4A-III OS=Mus musculus GN=Eif4a3 PE=2 SV=3	R.GLDVPQVSLIINYDLPNNR.E	0.06007	94.3334	0
Q8VE22	28S ribosomal protein S23, mitochondrial OS=Mus musculus GN=Mrps23 PE=1 SV=1	K.EKPLWYDIYK.A	0.27729	78.2908	0
Q8VE22	28S ribosomal protein S23, mitochondrial OS=Mus musculus GN=Mrps23 PE=1 SV=1	K.ADIQDIFYQEDQIR.A	0.06971	93.4833	0
Q8VE22	28S ribosomal protein S23, mitochondrial OS=Mus musculus GN=Mrps23 PE=1 SV=1	K.AFDLFNPNFK.S	0.03403	96.709	0
Q8VE22	28S ribosomal protein S23, mitochondrial OS=Mus musculus GN=Mrps23 PE=1 SV=1	K.YTELQNLGETDEEK.L	0.01123	98.8895	0
Q8VE22	28S ribosomal protein S23, mitochondrial OS=Mus musculus GN=Mrps23 PE=1 SV=1	K.YTELQNLGETDEEKLFVETGK.A	0.00399	99.6026	0
Q8VE22	28S ribosomal protein S23, mitochondrial OS=Mus musculus GN=Mrps23 PE=1 SV=1	K.ALLAEGIILR.R	0.01633	98.3932	0
Q9D0K2	Succinyl-CoA:3-ketoacid coenzyme A transferase 1, mitochondrial OS=Mus musculus GN=Oxct1 PE=1 SV=1	K.FYTDPVEAVK.D	0.01236	98.7791	0
Q9D0K2	Succinyl-CoA:3-ketoacid coenzyme A transferase 1, mitochondrial OS=Mus musculus GN=Oxct1 PE=1 SV=1	R.AGGAGVPAFYTSTGYGTLVQEGGSPIK.Y	0.00521	99.4817	0
Q9D0K2	Succinyl-CoA:3-ketoacid coenzyme A transferase 1, mitochondrial OS=Mus musculus GN=Oxct1 PE=1 SV=1	R.AGGAGVPAFYTSTGYGTLVQEGGSPIK.Y	0.01404	98.6154	0
Q9D0K2	Succinyl-CoA:3-ketoacid coenzyme A transferase 1, mitochondrial OS=Mus musculus GN=Oxct1 PE=1 SV=1	K.DGSVAIASKPR.E	0.00114	99.8861	0
Q9D0K2	Succinyl-CoA:3-ketoacid coenzyme A transferase 1, mitochondrial OS=Mus musculus GN=Oxct1 PE=1 SV=1	K.GMGGAMDLVSSSK.T	0.0125	98.7654	0
Q9D0K2	Succinyl-CoA:3-ketoacid coenzyme A transferase 1, mitochondrial OS=Mus musculus GN=Oxct1 PE=1 SV=1	K.GVFDVDKK.N	0.00397	99.6046	0
P52480	Pyruvate kinase PKM OS=Mus musculus GN=Pkm PE=1 SV=4	R.LNFSHGTHEYHAETIK.N	0.09508	91.3175	0
P52480	Pyruvate kinase PKM OS=Mus musculus GN=Pkm PE=1 SV=4	R.LNFSHGTHEYHAETIK.N	0.04289	95.8874	0
P52480	Pyruvate kinase PKM OS=Mus musculus GN=Pkm PE=1 SV=4	R.EATESFASDPILYRPVAVALDTK.G	0.00537	99.4659	0
P52480	Pyruvate kinase PKM OS=Mus musculus GN=Pkm PE=1 SV=4	K.ITLDNAYMEK.C	0.01497	98.5251	0
P52480	Pyruvate kinase PKM OS=Mus musculus GN=Pkm PE=1 SV=4	K.IYVDDGLISLQVK.E	0.02119	97.925	0
P52480	Pyruvate kinase PKM OS=Mus musculus GN=Pkm PE=1 SV=4	K.GADFLVTEVENGGSLGSK.K	0.06581	93.8254	0
P52480	Pyruvate kinase PKM OS=Mus musculus GN=Pkm PE=1 SV=4	K.KGVNLPGAAVDLPAVSEK.D	0.00996	99.0138	0
P52480	Pyruvate kinase PKM OS=Mus musculus GN=Pkm PE=1 SV=4	K.KGVNLPGAAVDLPAVSEK.D	0.04004	96.1501	0
P52480	Pyruvate kinase PKM OS=Mus musculus GN=Pkm PE=1 SV=4	K.GVNLPGAAVDLPAVSEK.D	0.01208	98.8064	0
P52480	Pyruvate kinase PKM OS=Mus musculus GN=Pkm PE=1 SV=4	K.GVNLPGAAVDLPAVSEKDIQDLK.F	0.0243	97.6276	0
P52480	Pyruvate kinase PKM OS=Mus musculus GN=Pkm PE=1 SV=4	R.GDLGIEIPAEK.V	0.04496	95.6974	0
P52480	Pyruvate kinase PKM OS=Mus musculus GN=Pkm PE=1 SV=4	K.GDYPLEAVR.M	0.03552	96.5698	0
P52480	Pyruvate kinase PKM OS=Mus musculus GN=Pkm PE=1 SV=4	R.LAPITSDPTEAAAVGAVEASFK.C	0.02123	97.9211	0
P52480	Pyruvate kinase PKM OS=Mus musculus GN=Pkm PE=1 SV=4	R.LAPITSDPTEAAAVGAVEASFK.C	0.02789	97.2867	0
P52480	Pyruvate kinase PKM OS=Mus musculus GN=Pkm PE=1 SV=4	R.APIIAVTR.N	0.03593	96.5316	0
P52480	Pyruvate kinase PKM OS=Mus musculus GN=Pkm PE=1 SV=4	R.VNLAMDVGK.A	0.02256	97.7938	0
P57784	U2 small nuclear ribonucleoprotein A' OS=Mus musculus GN=Snrpa1 PE=1 SV=2	K.LTAELIEQAAQYTNAVR.D	0.00405	99.5966	0
P57784	U2 small nuclear ribonucleoprotein A' OS=Mus musculus GN=Snrpa1 PE=1 SV=2	K.LTAELIEQAAQYTNAVR.D	0.01219	98.7957	0
P57784	U2 small nuclear ribonucleoprotein A' OS=Mus musculus GN=Snrpa1 PE=1 SV=2	K.SLTYLSILR.N	0.01506	98.5163	0
P05977	Myosin light chain 1/3, skeletal muscle isoform OS=Mus musculus GN=Myl1 PE=1 SV=2	K.EQQEDFKEAFLLFDR.T	0.01521	98.5018	0
P05977	Myosin light chain 1/3, skeletal muscle isoform OS=Mus musculus GN=Myl1 PE=1 SV=2	K.EAFLLFDR.T	0.00448	99.554	0
P05977	Myosin light chain 1/3, skeletal muscle isoform OS=Mus musculus GN=Myl1 PE=1 SV=2	K.ITLSQVGDVLR.A	0.00655	99.3493	0
P05977	Myosin light chain 1/3, skeletal muscle isoform OS=Mus musculus GN=Myl1 PE=1 SV=2	R.ALGTNPTNAEVK.K	0.01052	98.959	0
P05977	Myosin light chain 1/3, skeletal muscle isoform OS=Mus musculus GN=Myl1 PE=1 SV=2	K.VLGNPSNEEMNAK.K	0.0088	99.1277	0
P05977	Myosin light chain 1/3, skeletal muscle isoform OS=Mus musculus GN=Myl1 PE=1 SV=2	K.IEFEQFLPMMQAISNNK.D	0.00809	99.1975	0
P05977	Myosin light chain 1/3, skeletal muscle isoform OS=Mus musculus GN=Myl1 PE=1 SV=2	K.DQGGYEDFVEGLR.V	0.00818	99.1886	0
P05977	Myosin light chain 1/3, skeletal muscle isoform OS=Mus musculus GN=Myl1 PE=1 SV=2	R.HVLATLGEK.M	0.00852	99.1552	0
P43024	Cytochrome c oxidase subunit 6A1, mitochondrial OS=Mus musculus GN=Cox6a1 PE=1 SV=2	F.VALPGVGVSMLNVFLK.S	0.00221	99.7795	0
P43024	Cytochrome c oxidase subunit 6A1, mitochondrial OS=Mus musculus GN=Cox6a1 PE=1 SV=2	V.SMLNVFLK.S	0.0042	99.5818	0
P24270	Catalase OS=Mus musculus GN=Cat PE=1 SV=4	R.ASQRPDVLTTGGGNPIGDKLNIMTAGSR.G	0.03025	97.0638	0
P24270	Catalase OS=Mus musculus GN=Cat PE=1 SV=4	K.LNIMTAGSR.G	0.01561	98.463	0
P24270	Catalase OS=Mus musculus GN=Cat PE=1 SV=4	R.GPLLVQDVVFTDEMAHFDR.E	0.03827	96.3141	0
P24270	Catalase OS=Mus musculus GN=Cat PE=1 SV=4	R.GPLLVQDVVFTDEMAHFDR.E	0.04936	95.2962	0
P24270	Catalase OS=Mus musculus GN=Cat PE=1 SV=4	K.GAGAFGYFEVTHDITR.Y	0.02773	97.3018	0
P24270	Catalase OS=Mus musculus GN=Cat PE=1 SV=4	K.GAGAFGYFEVTHDITR.Y	0.00442	99.5599	0
P24270	Catalase OS=Mus musculus GN=Cat PE=1 SV=4	K.FYTEDGNWDLVGNNTPIFFIR.D	0.00852	99.1552	0
P24270	Catalase OS=Mus musculus GN=Cat PE=1 SV=4	K.FYTEDGNWDLVGNNTPIFFIR.D	0.03674	96.4562	0
P24270	Catalase OS=Mus musculus GN=Cat PE=1 SV=4	K.EAETFPFNPFDLTK.V	0.03369	96.7408	0
P24270	Catalase OS=Mus musculus GN=Cat PE=1 SV=4	R.FNSANEDNVTQVR.T	0.02887	97.194	0
P24270	Catalase OS=Mus musculus GN=Cat PE=1 SV=4	K.NFTDVHPDYGAR.I	0.0061	99.3937	0
Q9D0E1	Heterogeneous nuclear ribonucleoprotein M OS=Mus musculus GN=Hnrnpm PE=1 SV=3	R.AFITNIPFDVK.W	0.02892	97.1893	0
Q9D0E1	Heterogeneous nuclear ribonucleoprotein M OS=Mus musculus GN=Hnrnpm PE=1 SV=3	K.VMATTGGMGMGPGGPGMINIPPSILNNPNIPNEIIHALQAGR.L	0.02477	97.5829	0
Q9D0E1	Heterogeneous nuclear ribonucleoprotein M OS=Mus musculus GN=Hnrnpm PE=1 SV=3	R.LGSTVFVANLDYK.V	0.02867	97.2129	0
Q9D0E1	Heterogeneous nuclear ribonucleoprotein M OS=Mus musculus GN=Hnrnpm PE=1 SV=3	K.GIGMGNLGPAGMGMEGIGFGINK.I	0.0624	94.1265	0
Q9D0E1	Heterogeneous nuclear ribonucleoprotein M OS=Mus musculus GN=Hnrnpm PE=1 SV=3	K.GIGMGNLGPAGMGMEGIGFGINK.I	0.08674	92.0183	0
Q9D0E1	Heterogeneous nuclear ribonucleoprotein M OS=Mus musculus GN=Hnrnpm PE=1 SV=3	K.IGGMEGPFGGGMENMGR.F	0.00861	99.1463	0
Q9D0E1	Heterogeneous nuclear ribonucleoprotein M OS=Mus musculus GN=Hnrnpm PE=1 SV=3	R.FGSGMNMGR.I	0.01236	98.7791	0
Q9D0E1	Heterogeneous nuclear ribonucleoprotein M OS=Mus musculus GN=Hnrnpm PE=1 SV=3	K.QGGGGAGGSVPGIER.M	0.01504	98.5183	0
Q9D0E1	Heterogeneous nuclear ribonucleoprotein M OS=Mus musculus GN=Hnrnpm PE=1 SV=3	R.MGLVMDR.M	0.01346	98.6719	0
Q9D0E1	Heterogeneous nuclear ribonucleoprotein M OS=Mus musculus GN=Hnrnpm PE=1 SV=3	R.MGPLGLDHMASSIER.M	0.01516	98.5066	0
Q9D0E1	Heterogeneous nuclear ribonucleoprotein M OS=Mus musculus GN=Hnrnpm PE=1 SV=3	R.MGAGMGFGLER.M	0.01617	98.4087	0
Q9D0E1	Heterogeneous nuclear ribonucleoprotein M OS=Mus musculus GN=Hnrnpm PE=1 SV=3	R.MGLSMDR.M	0.0148	98.5416	0
Q9D0E1	Heterogeneous nuclear ribonucleoprotein M OS=Mus musculus GN=Hnrnpm PE=1 SV=3	R.MVPTGMGASLER.M	0.00744	99.2615	0
Q9D0E1	Heterogeneous nuclear ribonucleoprotein M OS=Mus musculus GN=Hnrnpm PE=1 SV=3	R.MGPAMGPALGAGIER.M	0.0475	95.4654	0
Q9D0E1	Heterogeneous nuclear ribonucleoprotein M OS=Mus musculus GN=Hnrnpm PE=1 SV=3	R.GNFGGSFAGSFGGAGGHAPGVAR.K	0.02196	97.8512	0
Q9D0E1	Heterogeneous nuclear ribonucleoprotein M OS=Mus musculus GN=Hnrnpm PE=1 SV=3	R.NLPFDFTWK.M	0.02067	97.9749	0
Q9D7S7	60S ribosomal protein L22-like 1 OS=Mus musculus GN=Rpl22l1 PE=1 SV=1	R.FHLDLTHPVEDGIFDSGNFEQFLR.E	0.04146	96.0191	0
Q9D7S7	60S ribosomal protein L22-like 1 OS=Mus musculus GN=Rpl22l1 PE=1 SV=1	R.FHLDLTHPVEDGIFDSGNFEQFLR.E	0.02826	97.2517	0
Q9D7S7	60S ribosomal protein L22-like 1 OS=Mus musculus GN=Rpl22l1 PE=1 SV=1	R.VVASDKETYELR.Y	0.03422	96.6912	0
Q9CQZ5	NADH dehydrogenase [ubiquinone] 1 alpha subcomplex subunit 6 OS=Mus musculus GN=Ndufa6 PE=1 SV=1	R.QAAAAAASTSVKPIFSR.D	0.0172	98.3091	0
Q9CQZ5	NADH dehydrogenase [ubiquinone] 1 alpha subcomplex subunit 6 OS=Mus musculus GN=Ndufa6 PE=1 SV=1	R.QAAAAAASTSVKPIFSR.D	0.02035	98.0056	0
Q9CQZ5	NADH dehydrogenase [ubiquinone] 1 alpha subcomplex subunit 6 OS=Mus musculus GN=Ndufa6 PE=1 SV=1	R.VVDLLVIK.G	0.02148	97.8972	0
Q9CQZ5	NADH dehydrogenase [ubiquinone] 1 alpha subcomplex subunit 6 OS=Mus musculus GN=Ndufa6 PE=1 SV=1	K.MELQETIK.V	0.00829	99.1778	0
P14869	60S acidic ribosomal protein P0 OS=Mus musculus GN=Rplp0 PE=1 SV=3	K.IIQLLDDYPK.C	0.014	98.6193	0
P14869	60S acidic ribosomal protein P0 OS=Mus musculus GN=Rplp0 PE=1 SV=3	R.GHLENNPALEK.L	0.09248	91.5349	0
P14869	60S acidic ribosomal protein P0 OS=Mus musculus GN=Rplp0 PE=1 SV=3	R.DMLLANK.V	0.02047	97.9941	0
P14869	60S acidic ribosomal protein P0 OS=Mus musculus GN=Rplp0 PE=1 SV=3	K.TSFFQALGITTK.I	0.03133	96.9622	0
P14869	60S acidic ribosomal protein P0 OS=Mus musculus GN=Rplp0 PE=1 SV=3	R.GTIEILSDVQLIK.T	0.0358	96.5437	0
P14869	60S acidic ribosomal protein P0 OS=Mus musculus GN=Rplp0 PE=1 SV=3	K.AFLADPSAFAAAAPAAAATTAAPAAAAAPAK.A	0.0052	99.4827	0
P14869	60S acidic ribosomal protein P0 OS=Mus musculus GN=Rplp0 PE=1 SV=3	K.AFLADPSAFAAAAPAAAATTAAPAAAAAPAK.A	0.05953	94.3815	0
P27661	Histone H2AX OS=Mus musculus GN=H2afx PE=1 SV=2	R.AGLQFPVGR.V	0.02642	97.426	0
P27661	Histone H2AX OS=Mus musculus GN=H2afx PE=1 SV=2	A.AVLEYLTAEILELAGNAAR.D	0.0111	98.9022	0
P27661	Histone H2AX OS=Mus musculus GN=H2afx PE=1 SV=2	A.AVLEYLTAEILELAGNAAR.D	0.02178	97.8684	0
P27661	Histone H2AX OS=Mus musculus GN=H2afx PE=1 SV=2	K.LLGGVTIAQGGVLPNIQAVLLPK.K	0.0246	97.5991	0
P27661	Histone H2AX OS=Mus musculus GN=H2afx PE=1 SV=2	K.LLGGVTIAQGGVLPNIQAVLLPK.K	0.03075	97.0167	0
P27661	Histone H2AX OS=Mus musculus GN=H2afx PE=1 SV=2	G.VTIAQGGVLPNIQAVLLPKK.S	0.00067	99.933	0
P27661	Histone H2AX OS=Mus musculus GN=H2afx PE=1 SV=2	V.TIAQGGVLPNIQAVLLPK.K	0.00223	99.7775	0
P27661	Histone H2AX OS=Mus musculus GN=H2afx PE=1 SV=2	N.IQAVLLPK.K	0.02272	97.7785	0
Q99JB2	Stomatin-like protein 2, mitochondrial OS=Mus musculus GN=Stoml2 PE=1 SV=1	R.NTVILFVPQQEAWVVER.M	0.00945	99.0638	0
Q99JB2	Stomatin-like protein 2, mitochondrial OS=Mus musculus GN=Stoml2 PE=1 SV=1	R.ILEPGLNVLIPVLDR.I	0.02686	97.3843	0
Q99JB2	Stomatin-like protein 2, mitochondrial OS=Mus musculus GN=Stoml2 PE=1 SV=1	R.IMDPYKASYGVEDPEYAVTQLAQTTMR.S	0.23322	81.0885	0
Q99JB2	Stomatin-like protein 2, mitochondrial OS=Mus musculus GN=Stoml2 PE=1 SV=1	K.ASYGVEDPEYAVTQLAQTTMR.S	0.00232	99.7685	0
Q99JB2	Stomatin-like protein 2, mitochondrial OS=Mus musculus GN=Stoml2 PE=1 SV=1	K.ASYGVEDPEYAVTQLAQTTMR.S	0.03825	96.3159	0
Q99JB2	Stomatin-like protein 2, mitochondrial OS=Mus musculus GN=Stoml2 PE=1 SV=1	K.AEQINQAAGEASAVLAK.A	0.02072	97.9701	0
Q99JB2	Stomatin-like protein 2, mitochondrial OS=Mus musculus GN=Stoml2 PE=1 SV=1	R.ILAGALTQHNGDAAASLTVAEQYVSAFSK.L	0.028	97.2763	0
Q99JB2	Stomatin-like protein 2, mitochondrial OS=Mus musculus GN=Stoml2 PE=1 SV=1	R.ILAGALTQHNGDAAASLTVAEQYVSAFSK.L	0.05316	94.9523	0
Q99JB2	Stomatin-like protein 2, mitochondrial OS=Mus musculus GN=Stoml2 PE=1 SV=1	K.DSNTVLLPSNPSDVTSMVAQAMGVYGALTK.A	0.047	95.511	0
Q99JB2	Stomatin-like protein 2, mitochondrial OS=Mus musculus GN=Stoml2 PE=1 SV=1	R.RDVQATDTSIEELGR.V	0.01529	98.494	0
Q99JB2	Stomatin-like protein 2, mitochondrial OS=Mus musculus GN=Stoml2 PE=1 SV=1	R.DVQATDTSIEELGR.V	0.0095	99.0589	0
Q8CGK3	Lon protease homolog, mitochondrial OS=Mus musculus GN=Lonp1 PE=1 SV=2	R.GGSDETSEGGAEDGATASTGEGPVVTALAPMTVPDVFPHLPLIAITR.N	0.04691	95.5192	0
Q8CGK3	Lon protease homolog, mitochondrial OS=Mus musculus GN=Lonp1 PE=1 SV=2	R.GGSDETSEGGAEDGATASTGEGPVVTALAPMTVPDVFPHLPLIAITR.N	0.03413	96.6996	0
Q8CGK3	Lon protease homolog, mitochondrial OS=Mus musculus GN=Lonp1 PE=1 SV=2	R.LAQPYVGVFLK.R	0.10035	90.8802	0
Q8CGK3	Lon protease homolog, mitochondrial OS=Mus musculus GN=Lonp1 PE=1 SV=2	R.QLEVEPEGLEPEAEK.Q	0.02845	97.2337	0
Q8CGK3	Lon protease homolog, mitochondrial OS=Mus musculus GN=Lonp1 PE=1 SV=2	R.DIIALNPLYR.E	0.0187	98.1643	0
Q8CGK3	Lon protease homolog, mitochondrial OS=Mus musculus GN=Lonp1 PE=1 SV=2	R.ESVLQMMQAGQR.V	0.03552	96.5698	0
Q8CGK3	Lon protease homolog, mitochondrial OS=Mus musculus GN=Lonp1 PE=1 SV=2	R.VVDNPIYLSDMGAALTGAESHELQDVLEETNILK.R	0.05093	95.1538	0
Q8CGK3	Lon protease homolog, mitochondrial OS=Mus musculus GN=Lonp1 PE=1 SV=2	R.VVDNPIYLSDMGAALTGAESHELQDVLEETNILK.R	0.06546	93.8562	0
Q8CGK3	Lon protease homolog, mitochondrial OS=Mus musculus GN=Lonp1 PE=1 SV=2	K.YLLQEQLK.I	0.01519	98.5037	0
Q8CGK3	Lon protease homolog, mitochondrial OS=Mus musculus GN=Lonp1 PE=1 SV=2	K.HVMDVVDEELSK.L	0.01813	98.2193	0
Q8CGK3	Lon protease homolog, mitochondrial OS=Mus musculus GN=Lonp1 PE=1 SV=2	K.LALLDNHSSEFNVTR.N	0.00704	99.3009	0
Q8CGK3	Lon protease homolog, mitochondrial OS=Mus musculus GN=Lonp1 PE=1 SV=2	K.LALLDNHSSEFNVTR.N	0.02937	97.1468	0
Q8CGK3	Lon protease homolog, mitochondrial OS=Mus musculus GN=Lonp1 PE=1 SV=2	R.NYLDWLTSIPWGR.Q	0.01965	98.0729	0
Q8CGK3	Lon protease homolog, mitochondrial OS=Mus musculus GN=Lonp1 PE=1 SV=2	R.AQAVLEEDHYGMEDVK.K	0.0091	99.0982	0
Q8CGK3	Lon protease homolog, mitochondrial OS=Mus musculus GN=Lonp1 PE=1 SV=2	R.AQAVLEEDHYGMEDVK.K	0.03363	96.7464	0
Q8CGK3	Lon protease homolog, mitochondrial OS=Mus musculus GN=Lonp1 PE=1 SV=2	R.FSVGGMTDVAEIK.G	0.09585	91.2534	0
Q8CGK3	Lon protease homolog, mitochondrial OS=Mus musculus GN=Lonp1 PE=1 SV=2	R.TYVGAMPGK.I	0.04645	95.5612	0
Q8CGK3	Lon protease homolog, mitochondrial OS=Mus musculus GN=Lonp1 PE=1 SV=2	K.TKTENPLVLIDEVDK.I	0.00908	99.1002	0
Q8CGK3	Lon protease homolog, mitochondrial OS=Mus musculus GN=Lonp1 PE=1 SV=2	K.TENPLVLIDEVDKIGR.G	0.00494	99.5084	0
Q8CGK3	Lon protease homolog, mitochondrial OS=Mus musculus GN=Lonp1 PE=1 SV=2	R.GYQGDPSSALLELLDPEQNANFLDHYLDVPVDLSK.V	0.04376	95.8075	0
Q8CGK3	Lon protease homolog, mitochondrial OS=Mus musculus GN=Lonp1 PE=1 SV=2	R.MEMINVSGYVAQEK.L	0.03131	96.9641	0
Q8CGK3	Lon protease homolog, mitochondrial OS=Mus musculus GN=Lonp1 PE=1 SV=2	K.AQLSAAVLTLLIK.Q	0.01892	98.1431	0
Q8CGK3	Lon protease homolog, mitochondrial OS=Mus musculus GN=Lonp1 PE=1 SV=2	K.AQLSAAVLTLLIK.Q	0.00977	99.0325	0
Q8CGK3	Lon protease homolog, mitochondrial OS=Mus musculus GN=Lonp1 PE=1 SV=2	K.IVSGEAQTVQVTPENLQDFVGKPVFTVER.M	0.00733	99.2723	0
Q8CGK3	Lon protease homolog, mitochondrial OS=Mus musculus GN=Lonp1 PE=1 SV=2	K.IVSGEAQTVQVTPENLQDFVGKPVFTVER.M	0.03814	96.3261	0
Q99JY0	Trifunctional enzyme subunit beta, mitochondrial OS=Mus musculus GN=Hadhb PE=1 SV=1	R.IPFLLSGTSYKDLMPHDLAR.A	0.00528	99.4748	0
Q99JY0	Trifunctional enzyme subunit beta, mitochondrial OS=Mus musculus GN=Hadhb PE=1 SV=1	R.TNIPKDVVDYIIFGTVIQEVK.T	0.03591	96.5335	0
Q99JY0	Trifunctional enzyme subunit beta, mitochondrial OS=Mus musculus GN=Hadhb PE=1 SV=1	R.EAALGAGFSDK.T	0.0105	98.9609	0
Q99JY0	Trifunctional enzyme subunit beta, mitochondrial OS=Mus musculus GN=Hadhb PE=1 SV=1	K.MMLDLNK.A	0.04982	95.2544	0
Q99JY0	Trifunctional enzyme subunit beta, mitochondrial OS=Mus musculus GN=Hadhb PE=1 SV=1	K.FRLNFLSPELPAVAEFSTNETMGHSADR.L	0.04211	95.9592	0
Q99JY0	Trifunctional enzyme subunit beta, mitochondrial OS=Mus musculus GN=Hadhb PE=1 SV=1	R.LNFLSPELPAVAEFSTNETMGHSADR.L	0.02218	97.8301	0
Q99JY0	Trifunctional enzyme subunit beta, mitochondrial OS=Mus musculus GN=Hadhb PE=1 SV=1	K.KAQDEGHLSDIVPFK.V	0.04158	96.008	0
Q99JY0	Trifunctional enzyme subunit beta, mitochondrial OS=Mus musculus GN=Hadhb PE=1 SV=1	K.KAQDEGHLSDIVPFKVPGK.D	0.00231	99.7695	0
Q99JY0	Trifunctional enzyme subunit beta, mitochondrial OS=Mus musculus GN=Hadhb PE=1 SV=1	K.DNGIRPSSLEQMAK.L	0.00558	99.4451	0
Q99JY0	Trifunctional enzyme subunit beta, mitochondrial OS=Mus musculus GN=Hadhb PE=1 SV=1	R.DFIYVSQDPK.D	0.01154	98.8592	0
Q99JY0	Trifunctional enzyme subunit beta, mitochondrial OS=Mus musculus GN=Hadhb PE=1 SV=1	R.DFIYVSQDPKDQLLLGPTYATPK.V	0.00266	99.7347	0
Q99JY0	Trifunctional enzyme subunit beta, mitochondrial OS=Mus musculus GN=Hadhb PE=1 SV=1	K.DQLLLGPTYATPK.V	0.00983	99.0266	0
Q99JY0	Trifunctional enzyme subunit beta, mitochondrial OS=Mus musculus GN=Hadhb PE=1 SV=1	K.AMDSDWFAQNYMGR.K	0.0026	99.7407	0
Q99JY0	Trifunctional enzyme subunit beta, mitochondrial OS=Mus musculus GN=Hadhb PE=1 SV=1	R.LVMAAANR.L	0.01002	99.0079	0
P14824	Annexin A6 OS=Mus musculus GN=Anxa6 PE=1 SV=3	R.GSVHDFPEFDANQDAEALYTAMK.G	0.01514	98.5086	0
P14824	Annexin A6 OS=Mus musculus GN=Anxa6 PE=1 SV=3	K.GFGSDKESILELITSR.S	0.00983	99.0266	0
P14824	Annexin A6 OS=Mus musculus GN=Anxa6 PE=1 SV=3	K.ESILELITSR.S	0.01698	98.3304	0
P14824	Annexin A6 OS=Mus musculus GN=Anxa6 PE=1 SV=3	K.SLYGKDLIEDLKYELTGK.F	0.01144	98.8689	0
P14824	Annexin A6 OS=Mus musculus GN=Anxa6 PE=1 SV=3	K.DLIEDLKYELTGK.F	0.00371	99.6304	0
P14824	Annexin A6 OS=Mus musculus GN=Anxa6 PE=1 SV=3	K.DLIEDLKYELTGK.F	0.00988	99.0217	0
P14824	Annexin A6 OS=Mus musculus GN=Anxa6 PE=1 SV=3	R.TNEQMHQLVAAYK.D	0.02394	97.662	0
P14824	Annexin A6 OS=Mus musculus GN=Anxa6 PE=1 SV=3	R.TNEQMHQLVAAYK.D	0.01601	98.4242	0
P14824	Annexin A6 OS=Mus musculus GN=Anxa6 PE=1 SV=3	R.DLESDIIGDTSGHFQK.M	0.01557	98.4669	0
P14824	Annexin A6 OS=Mus musculus GN=Anxa6 PE=1 SV=3	R.DLESDIIGDTSGHFQK.M	0.02859	97.2205	0
P14824	Annexin A6 OS=Mus musculus GN=Anxa6 PE=1 SV=3	K.MLVVLLQGTR.E	0.0128	98.7362	0
P14824	Annexin A6 OS=Mus musculus GN=Anxa6 PE=1 SV=3	R.ENDDVVSEDLVQQDVQDLYEAGELK.W	0.02488	97.5724	0
P14824	Annexin A6 OS=Mus musculus GN=Anxa6 PE=1 SV=3	K.WGTDEAQFIYILGNR.S	0.01107	98.9051	0
P14824	Annexin A6 OS=Mus musculus GN=Anxa6 PE=1 SV=3	K.WGTDEAQFIYILGNR.S	0.03218	96.8823	0
P14824	Annexin A6 OS=Mus musculus GN=Anxa6 PE=1 SV=3	R.LVFDEYLK.T	0.01813	98.2193	0
P14824	Annexin A6 OS=Mus musculus GN=Anxa6 PE=1 SV=3	R.STPEYFAER.L	0.00537	99.4659	0
P14824	Annexin A6 OS=Mus musculus GN=Anxa6 PE=1 SV=3	R.SELDMLDIR.E	0.02077	97.9653	0
P14824	Annexin A6 OS=Mus musculus GN=Anxa6 PE=1 SV=3	K.SLYSMIK.N	0.01189	98.825	0
P14824	Annexin A6 OS=Mus musculus GN=Anxa6 PE=1 SV=3	K.GIGTDEATIIDIVTHR.S	0.01606	98.4194	0
P14824	Annexin A6 OS=Mus musculus GN=Anxa6 PE=1 SV=3	K.SEISGDLAR.L	0.02083	97.9595	0
P14824	Annexin A6 OS=Mus musculus GN=Anxa6 PE=1 SV=3	R.LILGLMMPPAHYDAK.Q	0.00885	99.1228	0
P14824	Annexin A6 OS=Mus musculus GN=Anxa6 PE=1 SV=3	K.SLEDALSSDTSGHFR.R	0.02882	97.1987	0
P14824	Annexin A6 OS=Mus musculus GN=Anxa6 PE=1 SV=3	K.SLEDALSSDTSGHFRR.I	0.01308	98.7089	0
P14824	Annexin A6 OS=Mus musculus GN=Anxa6 PE=1 SV=3	R.EEGGENRDQAQEDAQVAAEILEIADTPSGDK.T	0.0063	99.3739	0
P14824	Annexin A6 OS=Mus musculus GN=Anxa6 PE=1 SV=3	R.DQAQEDAQVAAEILEIADTPSGDK.T	0.00909	99.0992	0
P14824	Annexin A6 OS=Mus musculus GN=Anxa6 PE=1 SV=3	R.DQAQEDAQVAAEILEIADTPSGDKTSLETR.F	0.04709	95.5028	0
P14824	Annexin A6 OS=Mus musculus GN=Anxa6 PE=1 SV=3	K.TNYDIEHVIK.K	0.0127	98.7459	0
P14824	Annexin A6 OS=Mus musculus GN=Anxa6 PE=1 SV=3	K.DAFVAIVQSVK.N	0.01476	98.5455	0
P14824	Annexin A6 OS=Mus musculus GN=Anxa6 PE=1 SV=3	R.SEIDLLNIR.R	0.02253	97.7966	0
P14824	Annexin A6 OS=Mus musculus GN=Anxa6 PE=1 SV=3	K.SLHQAIEGDTSGDFMK.A	0.04375	95.8084	0
P14824	Annexin A6 OS=Mus musculus GN=Anxa6 PE=1 SV=3	K.SLHQAIEGDTSGDFMK.A	0.02917	97.1657	0
P97807	Fumarate hydratase, mitochondrial OS=Mus musculus GN=Fh PE=1 SV=3	R.VEFDTFGELK.V	0.01548	98.4756	0
P97807	Fumarate hydratase, mitochondrial OS=Mus musculus GN=Fh PE=1 SV=3	R.VEFDTFGELKVPTDKYYGAQTVR.S	0.10757	90.2877	0
P97807	Fumarate hydratase, mitochondrial OS=Mus musculus GN=Fh PE=1 SV=3	R.MPIPVIQAFGILK.R	0.0319	96.9086	0
P97807	Fumarate hydratase, mitochondrial OS=Mus musculus GN=Fh PE=1 SV=3	R.MPIPVIQAFGILK.R	0.0036	99.6413	0
P97807	Fumarate hydratase, mitochondrial OS=Mus musculus GN=Fh PE=1 SV=3	R.MPIPVIQAFGILKR.A	0.00834	99.1729	0
P97807	Fumarate hydratase, mitochondrial OS=Mus musculus GN=Fh PE=1 SV=3	R.AAAEVNQEYGLDPK.I	0.02928	97.1553	0
P97807	Fumarate hydratase, mitochondrial OS=Mus musculus GN=Fh PE=1 SV=3	R.AIEMLGGELGSK.K	0.0156	98.464	0
P97807	Fumarate hydratase, mitochondrial OS=Mus musculus GN=Fh PE=1 SV=3	K.VLLPGLQK.L	0.01491	98.5309	0
P97807	Fumarate hydratase, mitochondrial OS=Mus musculus GN=Fh PE=1 SV=3	K.SKEFAQVIK.I	0.01636	98.3903	0
P97807	Fumarate hydratase, mitochondrial OS=Mus musculus GN=Fh PE=1 SV=3	R.THTQDAVPLTLGQEFSGYVQQVQYAMVR.I	0.09721	91.1403	0
P97807	Fumarate hydratase, mitochondrial OS=Mus musculus GN=Fh PE=1 SV=3	R.THTQDAVPLTLGQEFSGYVQQVQYAMVR.I	0.17226	85.3053	0
P97807	Fumarate hydratase, mitochondrial OS=Mus musculus GN=Fh PE=1 SV=3	K.VAALTGLPFVTAPNK.F	0.01335	98.6826	0
P97807	Fumarate hydratase, mitochondrial OS=Mus musculus GN=Fh PE=1 SV=3	R.SGLGELILPENEPGSSIMPGK.V	0.01533	98.4901	0
P97807	Fumarate hydratase, mitochondrial OS=Mus musculus GN=Fh PE=1 SV=3	R.SGLGELILPENEPGSSIMPGK.V	0.02488	97.5724	0
P97807	Fumarate hydratase, mitochondrial OS=Mus musculus GN=Fh PE=1 SV=3	K.LMNESLMLVTALNPHIGYDK.A	0.02505	97.5562	0
P97807	Fumarate hydratase, mitochondrial OS=Mus musculus GN=Fh PE=1 SV=3	K.ETAIELGYLTAEQFDEWVKPK.D	0.06018	94.3236	0
Q02819	Nucleobindin-1 OS=Mus musculus GN=Nucb1 PE=1 SV=2	K.LSQELDFVSHNVR.T	0.00897	99.111	0
Q02819	Nucleobindin-1 OS=Mus musculus GN=Nucb1 PE=1 SV=2	K.LSQELDFVSHNVR.T	0.02156	97.8895	0
Q02819	Nucleobindin-1 OS=Mus musculus GN=Nucb1 PE=1 SV=2	K.QEPNLQVDHMNLLK.Q	0.00235	99.7656	0
Q02819	Nucleobindin-1 OS=Mus musculus GN=Nucb1 PE=1 SV=2	K.VNVPGSQAQLK.E	0.01087	98.9247	0
Q02819	Nucleobindin-1 OS=Mus musculus GN=Nucb1 PE=1 SV=2	K.EVWEELDGLDPNRFNPK.T	0.0063	99.3739	0
Q02819	Nucleobindin-1 OS=Mus musculus GN=Nucb1 PE=1 SV=2	R.LVTLEEFLASTQR.K	0.00599	99.4046	0
Q02819	Nucleobindin-1 OS=Mus musculus GN=Nucb1 PE=1 SV=2	K.EFGDTGEGWK.T	0.01841	98.1923	0
Q02819	Nucleobindin-1 OS=Mus musculus GN=Nucb1 PE=1 SV=2	R.ELQQAVLQMEQR.K	0.01217	98.7976	0
Q02819	Nucleobindin-1 OS=Mus musculus GN=Nucb1 PE=1 SV=2	R.ELQQAVLQMEQR.K	0.02252	97.7976	0
Q02819	Nucleobindin-1 OS=Mus musculus GN=Nucb1 PE=1 SV=2	K.KVPEQPPELPQLDSQHL.-	0.04493	95.7002	0
Q02819	Nucleobindin-1 OS=Mus musculus GN=Nucb1 PE=1 SV=2	K.KVPEQPPELPQLDSQHL.-	0.05043	95.1991	0
P62702	40S ribosomal protein S4, X isoform OS=Mus musculus GN=Rps4x PE=2 SV=2	K.HWMLDK.L	0.06592	93.8157	0
P62702	40S ribosomal protein S4, X isoform OS=Mus musculus GN=Rps4x PE=2 SV=2	R.LKYALTGDEVK.K	2.51903	28.4169	0
P62702	40S ribosomal protein S4, X isoform OS=Mus musculus GN=Rps4x PE=2 SV=2	R.LKYALTGDEVK.K	0.03438	96.6763	0
P62702	40S ribosomal protein S4, X isoform OS=Mus musculus GN=Rps4x PE=2 SV=2	R.LKYALTGDEVKK.I	0.03393	96.7183	0
P62702	40S ribosomal protein S4, X isoform OS=Mus musculus GN=Rps4x PE=2 SV=2	K.VRTDITYPAGFMDVISIDK.T	0.00675	99.3295	0
P62702	40S ribosomal protein S4, X isoform OS=Mus musculus GN=Rps4x PE=2 SV=2	R.TDITYPAGFMDVISIDK.T	0.01082	98.9296	0
P62702	40S ribosomal protein S4, X isoform OS=Mus musculus GN=Rps4x PE=2 SV=2	R.TDITYPAGFMDVISIDKTGENFR.L	0.08117	92.4924	0
P62702	40S ribosomal protein S4, X isoform OS=Mus musculus GN=Rps4x PE=2 SV=2	K.GIPHLVTHDAR.T	0.00734	99.2713	0
P62702	40S ribosomal protein S4, X isoform OS=Mus musculus GN=Rps4x PE=2 SV=2	K.GIPHLVTHDAR.T	0.02335	97.7183	0
P62702	40S ribosomal protein S4, X isoform OS=Mus musculus GN=Rps4x PE=2 SV=2	R.HPGSFDVVHVK.D	0.18454	84.421	0
P62702	40S ribosomal protein S4, X isoform OS=Mus musculus GN=Rps4x PE=2 SV=2	R.LSNIFVIGK.G	0.02607	97.4592	0
P61750	ADP-ribosylation factor 4 OS=Mus musculus GN=Arf4 PE=1 SV=2	K.LGEIVTTIPTIGFNVETVEYK.N	0.02326	97.7269	0
P61750	ADP-ribosylation factor 4 OS=Mus musculus GN=Arf4 PE=1 SV=2	K.LGEIVTTIPTIGFNVETVEYK.N	0.02824	97.2536	0
P61750	ADP-ribosylation factor 4 OS=Mus musculus GN=Arf4 PE=1 SV=2	R.IQEGAAVLQK.M	0.02108	97.9355	0
P61750	ADP-ribosylation factor 4 OS=Mus musculus GN=Arf4 PE=1 SV=2	K.MLLEDELQDAVLLLFANK.Q	0.08127	92.4838	0
P61750	ADP-ribosylation factor 4 OS=Mus musculus GN=Arf4 PE=1 SV=2	K.MLLEDELQDAVLLLFANK.Q	0.04092	96.0689	0
P61750	ADP-ribosylation factor 4 OS=Mus musculus GN=Arf4 PE=1 SV=2	K.QDLPNAMAISEMTDK.L	0.0105	98.9609	0
P13541	Myosin-3 OS=Mus musculus GN=Myh3 PE=2 SV=2	R.IEAQNQPFDAK.T	0.0103	98.9805	0
P13541	Myosin-3 OS=Mus musculus GN=Myh3 PE=2 SV=2	K.IEDMAMLTHLNEPAVLYNLK.D	0.0149	98.5319	0
P13541	Myosin-3 OS=Mus musculus GN=Myh3 PE=2 SV=2	K.RQEAPPHIFSISDNAYQFMLTDR.E	0.00255	99.7456	0
P13541	Myosin-3 OS=Mus musculus GN=Myh3 PE=2 SV=2	K.RQEAPPHIFSISDNAYQFMLTDR.E	0.01402	98.6174	0
P13541	Myosin-3 OS=Mus musculus GN=Myh3 PE=2 SV=2	R.QEAPPHIFSISDNAYQFMLTDR.E	0.01998	98.0411	0
P13541	Myosin-3 OS=Mus musculus GN=Myh3 PE=2 SV=2	R.ENQSILITGESGAGK.T	0.00894	99.1139	0
P13541	Myosin-3 OS=Mus musculus GN=Myh3 PE=2 SV=2	R.VIQYFATIAATGDLAK.K	0.01574	98.4504	0
P13541	Myosin-3 OS=Mus musculus GN=Myh3 PE=2 SV=2	K.MKGTLEDQIISANPLLEAFGNAK.T	0.01627	98.399	0
P13541	Myosin-3 OS=Mus musculus GN=Myh3 PE=2 SV=2	K.LTGAVMHYGNMK.F	0.02609	97.4573	0
P13541	Myosin-3 OS=Mus musculus GN=Myh3 PE=2 SV=2	K.LTGAVMHYGNMK.F	0.01263	98.7528	0
P13541	Myosin-3 OS=Mus musculus GN=Myh3 PE=2 SV=2	K.TAYLMGLNSSDLLK.A	0.04481	95.7112	0
P13541	Myosin-3 OS=Mus musculus GN=Myh3 PE=2 SV=2	K.GQTVDQVHHAVNALSK.S	0.01323	98.6943	0
P13541	Myosin-3 OS=Mus musculus GN=Myh3 PE=2 SV=2	K.LFLWMVTR.I	0.00572	99.4313	0
P13541	Myosin-3 OS=Mus musculus GN=Myh3 PE=2 SV=2	K.LQQFFNHHMFVLEQEEYKK.E	0.00872	99.1355	0
P13541	Myosin-3 OS=Mus musculus GN=Myh3 PE=2 SV=2	K.LQQFFNHHMFVLEQEEYKK.E	0.00253	99.7476	0
P13541	Myosin-3 OS=Mus musculus GN=Myh3 PE=2 SV=2	K.NKDPLNETVVGLYQK.S	0.00106	99.8941	0
P13541	Myosin-3 OS=Mus musculus GN=Myh3 PE=2 SV=2	K.GSSFQTVSALFR.E	0.00805	99.2014	0
P13541	Myosin-3 OS=Mus musculus GN=Myh3 PE=2 SV=2	K.TPGAMEHSLVLHQLR.C	0.01814	98.2183	0
P13541	Myosin-3 OS=Mus musculus GN=Myh3 PE=2 SV=2	K.TPGAMEHSLVLHQLR.C	0.00573	99.4303	0
P13541	Myosin-3 OS=Mus musculus GN=Myh3 PE=2 SV=2	R.ILYGDFK.Q	0.00984	99.0256	0
P13541	Myosin-3 OS=Mus musculus GN=Myh3 PE=2 SV=2	R.VLNASAIPEGQFIDSK.K	0.01031	98.9795	0
P13541	Myosin-3 OS=Mus musculus GN=Myh3 PE=2 SV=2	K.AGLLGTLEEMRDER.L	0.01142	98.8709	0
P13541	Myosin-3 OS=Mus musculus GN=Myh3 PE=2 SV=2	K.HWPWMK.L	0.00689	99.3157	0
P13541	Myosin-3 OS=Mus musculus GN=Myh3 PE=2 SV=2	K.LVTLVQEK.N	0.00988	99.0217	0
P13541	Myosin-3 OS=Mus musculus GN=Myh3 PE=2 SV=2	K.NLTEELAGLDETIAK.L	0.00889	99.1188	0
P13541	Myosin-3 OS=Mus musculus GN=Myh3 PE=2 SV=2	K.NLTEELAGLDETIAK.L	0.01179	98.8347	0
P13541	Myosin-3 OS=Mus musculus GN=Myh3 PE=2 SV=2	K.ALQEAHQQTLDDLQAEEDKVNSLSK.L	0.00146	99.8542	0
P13541	Myosin-3 OS=Mus musculus GN=Myh3 PE=2 SV=2	K.LEQQVDDLESSLEQEK.K	0.01001	99.0089	0
P13541	Myosin-3 OS=Mus musculus GN=Myh3 PE=2 SV=2	K.LEQQVDDLESSLEQEK.K	0.01992	98.0469	0
P13541	Myosin-3 OS=Mus musculus GN=Myh3 PE=2 SV=2	K.LEQQVDDLESSLEQEKK.L	0.01098	98.9139	0
P13541	Myosin-3 OS=Mus musculus GN=Myh3 PE=2 SV=2	K.KKDFEYSQLQSK.V	0.00053	99.947	0
P13541	Myosin-3 OS=Mus musculus GN=Myh3 PE=2 SV=2	K.KDFEYSQLQSK.V	0.08247	92.3813	0
P13541	Myosin-3 OS=Mus musculus GN=Myh3 PE=2 SV=2	K.DFEYSQLQSK.V	0.01118	98.8944	0
P13541	Myosin-3 OS=Mus musculus GN=Myh3 PE=2 SV=2	K.VEDEQTLSLQLQK.K	0.0089	99.1179	0
P13541	Myosin-3 OS=Mus musculus GN=Myh3 PE=2 SV=2	R.LEEAGGVTSTQIELNK.K	0.00677	99.3276	0
P13541	Myosin-3 OS=Mus musculus GN=Myh3 PE=2 SV=2	R.RDLEEATLQHEATVATLR.K	16.0676	5.85905	0
P13541	Myosin-3 OS=Mus musculus GN=Myh3 PE=2 SV=2	R.DLEEATLQHEATVATLR.K	0.00229	99.7715	0
P13541	Myosin-3 OS=Mus musculus GN=Myh3 PE=2 SV=2	R.DLEEATLQHEATVATLR.K	0.00699	99.3059	0
P13541	Myosin-3 OS=Mus musculus GN=Myh3 PE=2 SV=2	K.KHADSAAELAEQIDNLQR.V	0.08917	91.813	0
P13541	Myosin-3 OS=Mus musculus GN=Myh3 PE=2 SV=2	K.HADSAAELAEQIDNLQR.V	0.00505	99.4975	0
P13541	Myosin-3 OS=Mus musculus GN=Myh3 PE=2 SV=2	K.HADSAAELAEQIDNLQR.V	0.01042	98.9687	0
P13541	Myosin-3 OS=Mus musculus GN=Myh3 PE=2 SV=2	K.LEIDDLSSSVESVSK.S	0.00969	99.0403	0
P13541	Myosin-3 OS=Mus musculus GN=Myh3 PE=2 SV=2	R.TLEDQLSEAR.G	0.01128	98.8846	0
P13541	Myosin-3 OS=Mus musculus GN=Myh3 PE=2 SV=2	K.ESIVSQLSR.S	0.00266	99.7347	0
P13541	Myosin-3 OS=Mus musculus GN=Myh3 PE=2 SV=2	K.QAFTQQIEELKR.Q	0.02624	97.4431	0
P13541	Myosin-3 OS=Mus musculus GN=Myh3 PE=2 SV=2	K.QAFTQQIEELKR.Q	0.02337	97.7164	0
P13541	Myosin-3 OS=Mus musculus GN=Myh3 PE=2 SV=2	K.ANSEVAQWR.T	0.00951	99.058	0
P13541	Myosin-3 OS=Mus musculus GN=Myh3 PE=2 SV=2	R.LQDSEEQVEAVNAK.C	0.01039	98.9717	0
P13541	Myosin-3 OS=Mus musculus GN=Myh3 PE=2 SV=2	R.LQGEVEDLMVDVER.A	0.01114	98.8983	0
P13541	Myosin-3 OS=Mus musculus GN=Myh3 PE=2 SV=2	R.LQGEVEDLMVDVER.A	0.00601	99.4026	0
P13541	Myosin-3 OS=Mus musculus GN=Myh3 PE=2 SV=2	R.ANSLAAALDK.K	0.00531	99.4718	0
P13541	Myosin-3 OS=Mus musculus GN=Myh3 PE=2 SV=2	K.NAYEEALDQLETVK.R	0.02341	97.7125	0
P13541	Myosin-3 OS=Mus musculus GN=Myh3 PE=2 SV=2	K.NAYEEALDQLETVK.R	0.01771	98.2598	0
P13541	Myosin-3 OS=Mus musculus GN=Myh3 PE=2 SV=2	R.IQLELTQVK.S	0.00946	99.0629	0
P13541	Myosin-3 OS=Mus musculus GN=Myh3 PE=2 SV=2	K.IAEKDEEIEQLKR.N	0.00253	99.7476	0
P13541	Myosin-3 OS=Mus musculus GN=Myh3 PE=2 SV=2	K.KMEGDLNEIEIQLSHANR.Q	0.00273	99.7277	0
P13541	Myosin-3 OS=Mus musculus GN=Myh3 PE=2 SV=2	K.KMEGDLNEIEIQLSHANR.Q	0.03189	96.9096	0
P13541	Myosin-3 OS=Mus musculus GN=Myh3 PE=2 SV=2	K.DTQLHLDDALR.G	0.00399	99.6026	0
P13541	Myosin-3 OS=Mus musculus GN=Myh3 PE=2 SV=2	K.DTQLHLDDALR.G	0.08633	92.0531	0
P13541	Myosin-3 OS=Mus musculus GN=Myh3 PE=2 SV=2	K.EQLAIVER.R	0.00569	99.4342	0
P13541	Myosin-3 OS=Mus musculus GN=Myh3 PE=2 SV=2	R.ANLLQAEVEELR.A	0.00903	99.1051	0
P13541	Myosin-3 OS=Mus musculus GN=Myh3 PE=2 SV=2	R.KLAEQELLDSNER.V	0.00036	99.964	0
P13541	Myosin-3 OS=Mus musculus GN=Myh3 PE=2 SV=2	R.KLAEQELLDSNER.V	0.0248	97.58	0
P13541	Myosin-3 OS=Mus musculus GN=Myh3 PE=2 SV=2	K.LAEQELLDSNER.V	0.00708	99.297	0
P13541	Myosin-3 OS=Mus musculus GN=Myh3 PE=2 SV=2	R.VQLLHTQNTSLIHTK.K	0.00188	99.8124	0
P13541	Myosin-3 OS=Mus musculus GN=Myh3 PE=2 SV=2	R.VQLLHTQNTSLIHTK.K	0.01236	98.7791	0
P13541	Myosin-3 OS=Mus musculus GN=Myh3 PE=2 SV=2	R.VQLLHTQNTSLIHTK.K	0.01865	98.1691	0
P13541	Myosin-3 OS=Mus musculus GN=Myh3 PE=2 SV=2	K.KAITDAAMMAEELKK.E	0.0386	96.2835	0
P13541	Myosin-3 OS=Mus musculus GN=Myh3 PE=2 SV=2	K.KAITDAAMMAEELKK.E	0.01003	99.007	0
P13541	Myosin-3 OS=Mus musculus GN=Myh3 PE=2 SV=2	K.AITDAAMMAEELK.K	0.01828	98.2048	0
P13541	Myosin-3 OS=Mus musculus GN=Myh3 PE=2 SV=2	R.LQDLVDKLQVK.V	0.00235	99.7656	0
P13541	Myosin-3 OS=Mus musculus GN=Myh3 PE=2 SV=2	R.LQDLVDKLQVK.V	0.05113	95.1357	0
P13541	Myosin-3 OS=Mus musculus GN=Myh3 PE=2 SV=2	R.QAEEADEQANAHLTK.F	0.00481	99.5213	0
P13541	Myosin-3 OS=Mus musculus GN=Myh3 PE=2 SV=2	R.QAEEADEQANAHLTK.F	0.00799	99.2073	0
Q91WD5	NADH dehydrogenase [ubiquinone] iron-sulfur protein 2, mitochondrial OS=Mus musculus GN=Ndufs2 PE=1 SV=1	K.ETAHWKPPPWNDVDILK.E	0.02913	97.1695	0
Q91WD5	NADH dehydrogenase [ubiquinone] iron-sulfur protein 2, mitochondrial OS=Mus musculus GN=Ndufs2 PE=1 SV=1	K.ETAHWKPPPWNDVDILK.E	0.00846	99.1611	0
Q91WD5	NADH dehydrogenase [ubiquinone] iron-sulfur protein 2, mitochondrial OS=Mus musculus GN=Ndufs2 PE=1 SV=1	K.AVTNMTLNFGPQHPAAHGVLR.L	0.01991	98.0479	0
Q91WD5	NADH dehydrogenase [ubiquinone] iron-sulfur protein 2, mitochondrial OS=Mus musculus GN=Ndufs2 PE=1 SV=1	K.TYLQALPYFDR.L	0.0266	97.4089	0
Q91WD5	NADH dehydrogenase [ubiquinone] iron-sulfur protein 2, mitochondrial OS=Mus musculus GN=Ndufs2 PE=1 SV=1	K.MFEFYER.V	0.01495	98.527	0
Q91WD5	NADH dehydrogenase [ubiquinone] iron-sulfur protein 2, mitochondrial OS=Mus musculus GN=Ndufs2 PE=1 SV=1	R.IDEVEEMLTNNR.I	0.01653	98.3739	0
Q91WD5	NADH dehydrogenase [ubiquinone] iron-sulfur protein 2, mitochondrial OS=Mus musculus GN=Ndufs2 PE=1 SV=1	K.TQPYDVYDQVEFDVPIGSR.G	0.00302	99.6989	0
Q91WD5	NADH dehydrogenase [ubiquinone] iron-sulfur protein 2, mitochondrial OS=Mus musculus GN=Ndufs2 PE=1 SV=1	K.TQPYDVYDQVEFDVPIGSR.G	0.01913	98.1229	0
Q91WD5	NADH dehydrogenase [ubiquinone] iron-sulfur protein 2, mitochondrial OS=Mus musculus GN=Ndufs2 PE=1 SV=1	K.TSMESLIHHFK.L	0.01198	98.8162	0
Q91WD5	NADH dehydrogenase [ubiquinone] iron-sulfur protein 2, mitochondrial OS=Mus musculus GN=Ndufs2 PE=1 SV=1	K.GEFGVYLVSDGSSRPYR.C	0.03749	96.3865	0
Q91WD5	NADH dehydrogenase [ubiquinone] iron-sulfur protein 2, mitochondrial OS=Mus musculus GN=Ndufs2 PE=1 SV=1	K.GEFGVYLVSDGSSRPYR.C	0.05364	94.9091	0
Q91WD5	NADH dehydrogenase [ubiquinone] iron-sulfur protein 2, mitochondrial OS=Mus musculus GN=Ndufs2 PE=1 SV=1	K.APGFAHLAGLDK.M	0.00669	99.3354	0
Q91WD5	NADH dehydrogenase [ubiquinone] iron-sulfur protein 2, mitochondrial OS=Mus musculus GN=Ndufs2 PE=1 SV=1	K.APGFAHLAGLDK.M	0.00569	99.4342	0
Q9D8S9	BolA-like protein 1 OS=Mus musculus GN=Bola1 PE=1 SV=1	R.AKLEQALSPEVLELR.N	0.0041	99.5917	0
Q61029	Lamina-associated polypeptide 2, isoforms beta/delta/epsilon/gamma OS=Mus musculus GN=Tmpo PE=1 SV=4	M.PEFLEDPSVLTK.D	0.01185	98.8289	0
Q61029	Lamina-associated polypeptide 2, isoforms beta/delta/epsilon/gamma OS=Mus musculus GN=Tmpo PE=1 SV=4	K.SELVANNVTLPAGEQR.K	0.00404	99.5976	0
Q61029	Lamina-associated polypeptide 2, isoforms beta/delta/epsilon/gamma OS=Mus musculus GN=Tmpo PE=1 SV=4	R.LEDKDDLDVTELSNEELLDQLVR.Y	0.05557	94.7355	0
Q61029	Lamina-associated polypeptide 2, isoforms beta/delta/epsilon/gamma OS=Mus musculus GN=Tmpo PE=1 SV=4	R.SSTPLPTVSSSAENTR.Q	0.00707	99.298	0
Q61029	Lamina-associated polypeptide 2, isoforms beta/delta/epsilon/gamma OS=Mus musculus GN=Tmpo PE=1 SV=4	R.IDGAVISESTPIAETIK.A	0.01302	98.7147	0
Q61029	Lamina-associated polypeptide 2, isoforms beta/delta/epsilon/gamma OS=Mus musculus GN=Tmpo PE=1 SV=4	K.YAPLADVK.S	0.02658	97.4108	0
O09174	Alpha-methylacyl-CoA racemase OS=Mus musculus GN=Amacr PE=1 SV=4	R.LGSTGENFLAR.G	0.00249	99.7516	0
O09174	Alpha-methylacyl-CoA racemase OS=Mus musculus GN=Amacr PE=1 SV=4	K.VAGHDINYLALSGVLSK.I	0.01442	98.5785	0
O09174	Alpha-methylacyl-CoA racemase OS=Mus musculus GN=Amacr PE=1 SV=4	R.GQNILDGGAPFYTTYK.T	0.02422	97.6353	0
O09174	Alpha-methylacyl-CoA racemase OS=Mus musculus GN=Amacr PE=1 SV=4	K.TADGEFMAVGAIEPQFYALLLK.G	0.00588	99.4154	0
O09174	Alpha-methylacyl-CoA racemase OS=Mus musculus GN=Amacr PE=1 SV=4	K.TADGEFMAVGAIEPQFYALLLK.G	0.04909	95.3207	0
O09174	Alpha-methylacyl-CoA racemase OS=Mus musculus GN=Amacr PE=1 SV=4	K.GLGLESEELPSQMSSADWPEMK.K	0.00582	99.4214	0
O09174	Alpha-methylacyl-CoA racemase OS=Mus musculus GN=Amacr PE=1 SV=4	K.GLGLESEELPSQMSSADWPEMK.K	0.00329	99.6721	0
O09174	Alpha-methylacyl-CoA racemase OS=Mus musculus GN=Amacr PE=1 SV=4	K.FADVFAK.K	0.00526	99.4768	0
O09174	Alpha-methylacyl-CoA racemase OS=Mus musculus GN=Amacr PE=1 SV=4	R.ASFITDGEQLPSPR.P	0.0119	98.824	0
O09174	Alpha-methylacyl-CoA racemase OS=Mus musculus GN=Amacr PE=1 SV=4	R.ASFITDGEQLPSPRPAPLLSR.T	0.01317	98.7001	0
O09174	Alpha-methylacyl-CoA racemase OS=Mus musculus GN=Amacr PE=1 SV=4	K.RDPSVGEHTVEVLR.E	0.0096	99.0491	0
Q78IK4	MICOS complex subunit Mic27 OS=Mus musculus GN=Apool PE=2 SV=1	K.QLVRPDQLPIYTAPPLHSK.Y	0.00542	99.4609	0
Q78IK4	MICOS complex subunit Mic27 OS=Mus musculus GN=Apool PE=2 SV=1	K.QLVRPDQLPIYTAPPLHSK.Y	0.01663	98.3642	0
Q78IK4	MICOS complex subunit Mic27 OS=Mus musculus GN=Apool PE=2 SV=1	K.MGVITASGLAGLLSAR.K	0.00691	99.3137	0
Q78IK4	MICOS complex subunit Mic27 OS=Mus musculus GN=Apool PE=2 SV=1	K.MGVITASGLAGLLSAR.K	0.00406	99.5956	0
Q78IK4	MICOS complex subunit Mic27 OS=Mus musculus GN=Apool PE=2 SV=1	K.AYATSQQIFQAIK.S	0.0869	92.0048	0
Q78IK4	MICOS complex subunit Mic27 OS=Mus musculus GN=Apool PE=2 SV=1	K.ELASATVIK.S	0.05705	94.6029	0
Q78IK4	MICOS complex subunit Mic27 OS=Mus musculus GN=Apool PE=2 SV=1	K.SESTSGTTQFIPDPK.L	0.0259	97.4754	0
Q78IK4	MICOS complex subunit Mic27 OS=Mus musculus GN=Apool PE=2 SV=1	K.LMDHGQSHPDDKDMYSTR.S	0.00426	99.5758	0
Q923D4	Splicing factor 3B subunit 5 OS=Mus musculus GN=Sf3b5 PE=2 SV=1	K.WEWLVNQHR.D	0.00489	99.5134	0
Q923D4	Splicing factor 3B subunit 5 OS=Mus musculus GN=Sf3b5 PE=2 SV=1	K.MLQPSGPPADKPEEN.-	0.00883	99.1247	0
P52503	NADH dehydrogenase [ubiquinone] iron-sulfur protein 6, mitochondrial OS=Mus musculus GN=Ndufs6 PE=1 SV=2	R.QKEVNENFAIDLIAQQPVNEVEHR.I	0.01195	98.8191	0
P08003	Protein disulfide-isomerase A4 OS=Mus musculus GN=Pdia4 PE=1 SV=3	K.QFAPEYEK.I	0.01689	98.3391	0
P08003	Protein disulfide-isomerase A4 OS=Mus musculus GN=Pdia4 PE=1 SV=3	K.IASTLKDNDPPIAVAK.I	0.00405	99.5966	0
P08003	Protein disulfide-isomerase A4 OS=Mus musculus GN=Pdia4 PE=1 SV=3	R.EVSQPDWTPPPEVTLSLTK.D	0.00751	99.2546	0
P08003	Protein disulfide-isomerase A4 OS=Mus musculus GN=Pdia4 PE=1 SV=3	R.EVSQPDWTPPPEVTLSLTK.D	0.05997	94.3423	0
P08003	Protein disulfide-isomerase A4 OS=Mus musculus GN=Pdia4 PE=1 SV=3	K.VDATEQTDLAK.R	0.01038	98.9727	0
P08003	Protein disulfide-isomerase A4 OS=Mus musculus GN=Pdia4 PE=1 SV=3	K.GRPFDYNGPR.E	0.00553	99.45	0
P08003	Protein disulfide-isomerase A4 OS=Mus musculus GN=Pdia4 PE=1 SV=3	K.GRPFDYNGPR.E	0.16845	85.5835	0
P08003	Protein disulfide-isomerase A4 OS=Mus musculus GN=Pdia4 PE=1 SV=3	R.EKYGIVDYMIEQSGPPSK.E	0.04617	95.5868	0
P08003	Protein disulfide-isomerase A4 OS=Mus musculus GN=Pdia4 PE=1 SV=3	K.YGIVDYMIEQSGPPSK.E	0.02379	97.6763	0
P08003	Protein disulfide-isomerase A4 OS=Mus musculus GN=Pdia4 PE=1 SV=3	K.YGIVDYMIEQSGPPSK.E	0.02736	97.3369	0
P08003	Protein disulfide-isomerase A4 OS=Mus musculus GN=Pdia4 PE=1 SV=3	K.FHHTFSPEIAK.F	0.06593	93.8148	0
P08003	Protein disulfide-isomerase A4 OS=Mus musculus GN=Pdia4 PE=1 SV=3	K.LVLTHPEK.F	0.00556	99.4471	0
P08003	Protein disulfide-isomerase A4 OS=Mus musculus GN=Pdia4 PE=1 SV=3	R.FHVMDVQGSTEASAIK.D	0.0058	99.4233	0
P08003	Protein disulfide-isomerase A4 OS=Mus musculus GN=Pdia4 PE=1 SV=3	R.FHVMDVQGSTEASAIK.D	0.05746	94.5662	0
P08003	Protein disulfide-isomerase A4 OS=Mus musculus GN=Pdia4 PE=1 SV=3	K.DLGLSESGEDVNAAILDESGKK.F	0.00275	99.7258	0
P08003	Protein disulfide-isomerase A4 OS=Mus musculus GN=Pdia4 PE=1 SV=3	K.FAMEPEEFDSDTLR.E	0.01198	98.8162	0
P08003	Protein disulfide-isomerase A4 OS=Mus musculus GN=Pdia4 PE=1 SV=3	K.QLEPIYTSLGK.K	0.01494	98.528	0
P08003	Protein disulfide-isomerase A4 OS=Mus musculus GN=Pdia4 PE=1 SV=3	K.VEGFPTIYFAPSGDK.K	0.00928	99.0805	0
Q64475	Histone H2B type 1-B OS=Mus musculus GN=Hist1h2bb PE=1 SV=3	M.GIMNSFVNDIFER.I	0.01839	98.1942	0
Q505N7	Sulfurtransferase OS=Mus musculus GN=Mpst PE=2 SV=1	K.LLDASWYLPK.L	0.05145	95.1068	0
Q505N7	Sulfurtransferase OS=Mus musculus GN=Mpst PE=2 SV=1	R.HIPGAAFFDIDR.C	0.01054	98.957	0
Q505N7	Sulfurtransferase OS=Mus musculus GN=Mpst PE=2 SV=1	K.SHSEPAEFSAQLDPSFIK.T	0.00599	99.4046	0
Q505N7	Sulfurtransferase OS=Mus musculus GN=Mpst PE=2 SV=1	K.THEDILENLDAR.R	0.03034	97.0553	0
Q505N7	Sulfurtransferase OS=Mus musculus GN=Mpst PE=2 SV=1	K.THEDILENLDAR.R	0.02534	97.5286	0
Q505N7	Sulfurtransferase OS=Mus musculus GN=Mpst PE=2 SV=1	R.DGIEPGHIPGSVNIPFTEFLTNEGLEK.S	0.03635	96.4925	0
Q505N7	Sulfurtransferase OS=Mus musculus GN=Mpst PE=2 SV=1	R.AQPEHIISEGR.G	0.01853	98.1807	0
O54962	Barrier-to-autointegration factor OS=Mus musculus GN=Banf1 PE=1 SV=1	R.DFVAEPMGEKPVGSLAGIGDVLSK.R	0.0075	99.2556	0
P45952	Medium-chain specific acyl-CoA dehydrogenase, mitochondrial OS=Mus musculus GN=Acadm PE=1 SV=1	R.EEIIPVAPEYDK.S	0.0123	98.7849	0
P45952	Medium-chain specific acyl-CoA dehydrogenase, mitochondrial OS=Mus musculus GN=Acadm PE=1 SV=1	K.SGEYPFPLIK.R	0.01073	98.9384	0
P45952	Medium-chain specific acyl-CoA dehydrogenase, mitochondrial OS=Mus musculus GN=Acadm PE=1 SV=1	K.SGEYPFPLIKR.A	0.00102	99.8981	0
P45952	Medium-chain specific acyl-CoA dehydrogenase, mitochondrial OS=Mus musculus GN=Acadm PE=1 SV=1	K.MWITNGGK.A	0.009	99.108	0
P45952	Medium-chain specific acyl-CoA dehydrogenase, mitochondrial OS=Mus musculus GN=Acadm PE=1 SV=1	K.ANWYFLLAR.S	0.01329	98.6884	0
P45952	Medium-chain specific acyl-CoA dehydrogenase, mitochondrial OS=Mus musculus GN=Acadm PE=1 SV=1	R.GIAFEDVR.V	0.01198	98.8162	0
P45952	Medium-chain specific acyl-CoA dehydrogenase, mitochondrial OS=Mus musculus GN=Acadm PE=1 SV=1	K.ENVLIGEGAGFK.I	0.02878	97.2025	0
P45952	Medium-chain specific acyl-CoA dehydrogenase, mitochondrial OS=Mus musculus GN=Acadm PE=1 SV=1	R.TRPTVAAGAVGLAQR.A	0.01764	98.2666	0
P45952	Medium-chain specific acyl-CoA dehydrogenase, mitochondrial OS=Mus musculus GN=Acadm PE=1 SV=1	R.NTYYASIAK.A	0.03329	96.7783	0
P45952	Medium-chain specific acyl-CoA dehydrogenase, mitochondrial OS=Mus musculus GN=Acadm PE=1 SV=1	K.AFAGDIANQLATDAVQIFGGYGFNTEYPVEK.L	0.04549	95.6489	0
P45952	Medium-chain specific acyl-CoA dehydrogenase, mitochondrial OS=Mus musculus GN=Acadm PE=1 SV=1	K.AFAGDIANQLATDAVQIFGGYGFNTEYPVEK.L	0.04354	95.8277	0
P45952	Medium-chain specific acyl-CoA dehydrogenase, mitochondrial OS=Mus musculus GN=Acadm PE=1 SV=1	K.IYQIYEGTAQIQR.L	0.02749	97.3245	0
Q9R0X4	Acyl-coenzyme A thioesterase 9, mitochondrial OS=Mus musculus GN=Acot9 PE=1 SV=1	K.ISEPLHIHQVR.D	0.00116	99.8841	0
Q9R0X4	Acyl-coenzyme A thioesterase 9, mitochondrial OS=Mus musculus GN=Acot9 PE=1 SV=1	K.ISEPLHIHQVR.D	0.01459	98.562	0
Q9R0X4	Acyl-coenzyme A thioesterase 9, mitochondrial OS=Mus musculus GN=Acot9 PE=1 SV=1	R.EIVGVSTVWR.D	0.01316	98.7011	0
Q9R0X4	Acyl-coenzyme A thioesterase 9, mitochondrial OS=Mus musculus GN=Acot9 PE=1 SV=1	R.DKYVTVQNTVR.F	0.00143	99.8572	0
Q9R0X4	Acyl-coenzyme A thioesterase 9, mitochondrial OS=Mus musculus GN=Acot9 PE=1 SV=1	R.DKYVTVQNTVR.F	0.04037	96.1196	0
Q9R0X4	Acyl-coenzyme A thioesterase 9, mitochondrial OS=Mus musculus GN=Acot9 PE=1 SV=1	K.YVTVQNTVR.F	0.03356	96.753	0
Q9R0X4	Acyl-coenzyme A thioesterase 9, mitochondrial OS=Mus musculus GN=Acot9 PE=1 SV=1	K.MSPLSIVTVLVDK.I	0.01457	98.5639	0
Q9R0X4	Acyl-coenzyme A thioesterase 9, mitochondrial OS=Mus musculus GN=Acot9 PE=1 SV=1	K.HSLSPEQDIK.F	0.02314	97.7383	0
Q9R0X4	Acyl-coenzyme A thioesterase 9, mitochondrial OS=Mus musculus GN=Acot9 PE=1 SV=1	K.MFQLHNDEK.Y	0.01411	98.6086	0
Q9R0X4	Acyl-coenzyme A thioesterase 9, mitochondrial OS=Mus musculus GN=Acot9 PE=1 SV=1	K.GPAFVNPLIPENKEEEELFK.Q	0.00078	99.9221	0
Q9R0X4	Acyl-coenzyme A thioesterase 9, mitochondrial OS=Mus musculus GN=Acot9 PE=1 SV=1	R.IAFSTSSLLK.V	0.01487	98.5348	0
Q9R0X4	Acyl-coenzyme A thioesterase 9, mitochondrial OS=Mus musculus GN=Acot9 PE=1 SV=1	K.AVWMEDTK.L	0.01744	98.2859	0
Q9R0X4	Acyl-coenzyme A thioesterase 9, mitochondrial OS=Mus musculus GN=Acot9 PE=1 SV=1	R.IFGGFLMR.K	0.01405	98.6145	0
Q9R0X4	Acyl-coenzyme A thioesterase 9, mitochondrial OS=Mus musculus GN=Acot9 PE=1 SV=1	R.EHMTTNVFHFTFMSEK.E	0.01696	98.3323	0
Q9R0X4	Acyl-coenzyme A thioesterase 9, mitochondrial OS=Mus musculus GN=Acot9 PE=1 SV=1	N.VFHFTFMSEK.E	0.00969	99.0403	0
Q9R0X4	Acyl-coenzyme A thioesterase 9, mitochondrial OS=Mus musculus GN=Acot9 PE=1 SV=1	K.SMSTPVTLK.K	0.01846	98.1875	0
Q9CPP6	NADH dehydrogenase [ubiquinone] 1 alpha subcomplex subunit 5 OS=Mus musculus GN=Ndufa5 PE=1 SV=3	R.LTILYTK.T	0.02985	97.1015	0
Q9CPP6	NADH dehydrogenase [ubiquinone] 1 alpha subcomplex subunit 5 OS=Mus musculus GN=Ndufa5 PE=1 SV=3	R.KYTEQITNEKLDMVK.A	0.00508	99.4946	0
Q9CPP6	NADH dehydrogenase [ubiquinone] 1 alpha subcomplex subunit 5 OS=Mus musculus GN=Ndufa5 PE=1 SV=3	K.YTEQITNEKLDMVK.A	0.00852	99.1552	0
Q9CPP6	NADH dehydrogenase [ubiquinone] 1 alpha subcomplex subunit 5 OS=Mus musculus GN=Ndufa5 PE=1 SV=3	K.KLEALLQGGEVEEVILQAEKELSLAR.K	0.00452	99.55	0
Q9CPP6	NADH dehydrogenase [ubiquinone] 1 alpha subcomplex subunit 5 OS=Mus musculus GN=Ndufa5 PE=1 SV=3	K.WKPWEPLVEEPPANQWK.W	0.00162	99.8383	0
Q64727	Vinculin OS=Mus musculus GN=Vcl PE=1 SV=4	R.TIESILEPVAQQISHLVIMHEEGEVDGK.A	0.05354	94.9181	0
Q64727	Vinculin OS=Mus musculus GN=Vcl PE=1 SV=4	K.ELLPVLISAMK.I	0.00734	99.2713	0
Q64727	Vinculin OS=Mus musculus GN=Vcl PE=1 SV=4	R.VLQLTSWDEDAWASK.D	0.01616	98.4097	0
Q64727	Vinculin OS=Mus musculus GN=Vcl PE=1 SV=4	K.MLGQMTDQVADLR.A	0.03806	96.3335	0
Q64727	Vinculin OS=Mus musculus GN=Vcl PE=1 SV=4	K.AQQVSQGLDVLTAK.V	0.02906	97.1761	0
Q64727	Vinculin OS=Mus musculus GN=Vcl PE=1 SV=4	R.SLGEIAALTSK.L	0.00525	99.4777	0
Q64727	Vinculin OS=Mus musculus GN=Vcl PE=1 SV=4	K.QVATALQNLQTK.T	0.01456	98.5649	0
Q64727	Vinculin OS=Mus musculus GN=Vcl PE=1 SV=4	R.WIDNPTVDDR.G	0.01425	98.595	0
Q64727	Vinculin OS=Mus musculus GN=Vcl PE=1 SV=4	R.VDQLTAQLADLAAR.G	0.02586	97.4792	0
Q64727	Vinculin OS=Mus musculus GN=Vcl PE=1 SV=4	R.ALASQLQDSLK.D	0.00689	99.3157	0
Q64727	Vinculin OS=Mus musculus GN=Vcl PE=1 SV=4	K.AQMQEAMTQEVSDVFSDTTTPIK.L	0.10942	90.1372	0
Q64727	Vinculin OS=Mus musculus GN=Vcl PE=1 SV=4	K.LLAVAATAPPDAPNREEVFDER.A	0.0724	93.2488	0
Q64727	Vinculin OS=Mus musculus GN=Vcl PE=1 SV=4	K.NQWIDNVEK.M	0.0918	91.5919	0
Q64727	Vinculin OS=Mus musculus GN=Vcl PE=1 SV=4	K.VAMANIQPQMLVAGATSIAR.R	0.02408	97.6486	0
Q64727	Vinculin OS=Mus musculus GN=Vcl PE=1 SV=4	K.TISPMVMDAK.A	0.00648	99.3562	0
Q64727	Vinculin OS=Mus musculus GN=Vcl PE=1 SV=4	K.AGEVINQPMMMAAR.Q	0.08588	92.0912	0
Q64727	Vinculin OS=Mus musculus GN=Vcl PE=1 SV=4	R.IPTISTQLK.I	0.00979	99.0305	0
Q64727	Vinculin OS=Mus musculus GN=Vcl PE=1 SV=4	R.TNISDEESEQATEMLVHNAQNLMQSVK.E	0.01568	98.4562	0
Q9Z2I8	Succinyl-CoA ligase [GDP-forming] subunit beta, mitochondrial OS=Mus musculus GN=Suclg2 PE=1 SV=3	K.VVGELAQQMIGYNLATK.Q	0.0211	97.9336	0
Q9Z2I8	Succinyl-CoA ligase [GDP-forming] subunit beta, mitochondrial OS=Mus musculus GN=Suclg2 PE=1 SV=3	K.VVGELAQQMIGYNLATK.Q	0.03656	96.4729	0
Q9Z2I8	Succinyl-CoA ligase [GDP-forming] subunit beta, mitochondrial OS=Mus musculus GN=Suclg2 PE=1 SV=3	R.ETYLAILMDR.S	0.00988	99.0217	0
Q9Z2I8	Succinyl-CoA ligase [GDP-forming] subunit beta, mitochondrial OS=Mus musculus GN=Suclg2 PE=1 SV=3	R.SHNGPVIVGSPQGGVDIEEVAASSPELIFK.E	0.06028	94.3147	0
Q9Z2I8	Succinyl-CoA ligase [GDP-forming] subunit beta, mitochondrial OS=Mus musculus GN=Suclg2 PE=1 SV=3	K.INFDDNAEFR.Q	0.01294	98.7225	0
Q8QZT1	Acetyl-CoA acetyltransferase, mitochondrial OS=Mus musculus GN=Acat1 PE=1 SV=1	Y.ASKPTLNEVVIVSAIR.T	0.00072	99.9281	0
Q8QZT1	Acetyl-CoA acetyltransferase, mitochondrial OS=Mus musculus GN=Acat1 PE=1 SV=1	Y.ASKPTLNEVVIVSAIR.T	0.00338	99.6631	0
Q8QZT1	Acetyl-CoA acetyltransferase, mitochondrial OS=Mus musculus GN=Acat1 PE=1 SV=1	R.TPIGSFLGSLASQPATK.L	0.01029	98.9815	0
Q8QZT1	Acetyl-CoA acetyltransferase, mitochondrial OS=Mus musculus GN=Acat1 PE=1 SV=1	R.TPIGSFLGSLASQPATK.L	0.0119	98.824	0
Q8QZT1	Acetyl-CoA acetyltransferase, mitochondrial OS=Mus musculus GN=Acat1 PE=1 SV=1	K.LGTAAIQGAIEK.A	0.02253	97.7966	0
Q8QZT1	Acetyl-CoA acetyltransferase, mitochondrial OS=Mus musculus GN=Acat1 PE=1 SV=1	K.EVYMGNVIQGGEGQAPTR.Q	0.01072	98.9394	0
Q8QZT1	Acetyl-CoA acetyltransferase, mitochondrial OS=Mus musculus GN=Acat1 PE=1 SV=1	K.EVYMGNVIQGGEGQAPTR.Q	0.00308	99.6929	0
Q8QZT1	Acetyl-CoA acetyltransferase, mitochondrial OS=Mus musculus GN=Acat1 PE=1 SV=1	K.LEDLIVK.D	0.01382	98.6368	0
Q8QZT1	Acetyl-CoA acetyltransferase, mitochondrial OS=Mus musculus GN=Acat1 PE=1 SV=1	K.DGLTDVYNK.I	0.02414	97.6429	0
Q8QZT1	Acetyl-CoA acetyltransferase, mitochondrial OS=Mus musculus GN=Acat1 PE=1 SV=1	R.QEQDTYALSSYTR.S	0.00829	99.1778	0
Q8QZT1	Acetyl-CoA acetyltransferase, mitochondrial OS=Mus musculus GN=Acat1 PE=1 SV=1	K.FASEITPITISVK.G	0.03151	96.9453	0
Q8QZT1	Acetyl-CoA acetyltransferase, mitochondrial OS=Mus musculus GN=Acat1 PE=1 SV=1	K.ENGTITAANASTLNDGAAALVLMTAEAAQR.L	0.00057	99.943	0
Q8QZT1	Acetyl-CoA acetyltransferase, mitochondrial OS=Mus musculus GN=Acat1 PE=1 SV=1	K.ENGTITAANASTLNDGAAALVLMTAEAAQR.L	0.00929	99.0796	0
Q8QZT1	Acetyl-CoA acetyltransferase, mitochondrial OS=Mus musculus GN=Acat1 PE=1 SV=1	R.LNVKPLAR.I	0.00088	99.9121	0
Q8QZT1	Acetyl-CoA acetyltransferase, mitochondrial OS=Mus musculus GN=Acat1 PE=1 SV=1	R.IAAFADAAVDPIDFPLAPAYAVPK.V	0.01338	98.6797	0
Q8QZT1	Acetyl-CoA acetyltransferase, mitochondrial OS=Mus musculus GN=Acat1 PE=1 SV=1	R.IAAFADAAVDPIDFPLAPAYAVPK.V	0.01813	98.2193	0
Q8QZT1	Acetyl-CoA acetyltransferase, mitochondrial OS=Mus musculus GN=Acat1 PE=1 SV=1	K.MLEIDPQK.V	0.03147	96.949	0
Q8QZT1	Acetyl-CoA acetyltransferase, mitochondrial OS=Mus musculus GN=Acat1 PE=1 SV=1	K.VNIHGGAVSLGHPIGMSGAR.I	0.00941	99.0678	0
Q8QZT1	Acetyl-CoA acetyltransferase, mitochondrial OS=Mus musculus GN=Acat1 PE=1 SV=1	K.VNIHGGAVSLGHPIGMSGAR.I	0.02405	97.6515	0
P53994	Ras-related protein Rab-2A OS=Mus musculus GN=Rab2a PE=1 SV=1	R.GAAGALLVYDITR.R	0.003	99.7009	0
P53994	Ras-related protein Rab-2A OS=Mus musculus GN=Rab2a PE=1 SV=1	R.GAAGALLVYDITRR.D	0.00689	99.3157	0
P53994	Ras-related protein Rab-2A OS=Mus musculus GN=Rab2a PE=1 SV=1	R.GAAGALLVYDITRR.D	0.00893	99.1149	0
P53994	Ras-related protein Rab-2A OS=Mus musculus GN=Rab2a PE=1 SV=1	R.RDTFNHLTTWLEDAR.Q	0.07565	92.967	0
P53994	Ras-related protein Rab-2A OS=Mus musculus GN=Rab2a PE=1 SV=1	R.DTFNHLTTWLEDAR.Q	0.00455	99.5471	0
P53994	Ras-related protein Rab-2A OS=Mus musculus GN=Rab2a PE=1 SV=1	R.DTFNHLTTWLEDAR.Q	0.01844	98.1894	0
P53994	Ras-related protein Rab-2A OS=Mus musculus GN=Rab2a PE=1 SV=1	R.QHSNSNMVIMLIGNK.S	0.00591	99.4125	0
P53994	Ras-related protein Rab-2A OS=Mus musculus GN=Rab2a PE=1 SV=1	R.EHGLIFMETSAK.T	0.02447	97.6114	0
P53994	Ras-related protein Rab-2A OS=Mus musculus GN=Rab2a PE=1 SV=1	R.EHGLIFMETSAK.T	0.05678	94.6271	0
P53994	Ras-related protein Rab-2A OS=Mus musculus GN=Rab2a PE=1 SV=1	K.TASNVEEAFINTAK.E	0.01875	98.1595	0
P53994	Ras-related protein Rab-2A OS=Mus musculus GN=Rab2a PE=1 SV=1	K.IQEGVFDINNEANGIK.I	0.00903	99.1051	0
Q8K009	Mitochondrial 10-formyltetrahydrofolate dehydrogenase OS=Mus musculus GN=Aldh1l2 PE=1 SV=2	R.VVGVFTVPDKDGK.A	0.06047	94.2978	0
Q8K009	Mitochondrial 10-formyltetrahydrofolate dehydrogenase OS=Mus musculus GN=Aldh1l2 PE=1 SV=2	K.AGFSVFWADDGLDTGPILLQR.S	0.03068	97.0233	0
Q8K009	Mitochondrial 10-formyltetrahydrofolate dehydrogenase OS=Mus musculus GN=Aldh1l2 PE=1 SV=2	K.AGFSVFWADDGLDTGPILLQR.S	0.07067	93.3995	0
Q8K009	Mitochondrial 10-formyltetrahydrofolate dehydrogenase OS=Mus musculus GN=Aldh1l2 PE=1 SV=2	R.FLFPEGIK.A	0.0328	96.8242	0
Q8K009	Mitochondrial 10-formyltetrahydrofolate dehydrogenase OS=Mus musculus GN=Aldh1l2 PE=1 SV=2	K.AMVEAVQLIADGK.A	0.02651	97.4175	0
Q8K009	Mitochondrial 10-formyltetrahydrofolate dehydrogenase OS=Mus musculus GN=Aldh1l2 PE=1 SV=2	R.TPQPEEGATYEGIQK.K	0.03575	96.5484	0
Q8K009	Mitochondrial 10-formyltetrahydrofolate dehydrogenase OS=Mus musculus GN=Aldh1l2 PE=1 SV=2	K.ENAEVSWDQPAEGLHNWIR.G	0.03297	96.8082	0
Q8K009	Mitochondrial 10-formyltetrahydrofolate dehydrogenase OS=Mus musculus GN=Aldh1l2 PE=1 SV=2	K.ENAEVSWDQPAEGLHNWIR.G	0.03969	96.1825	0
Q8K009	Mitochondrial 10-formyltetrahydrofolate dehydrogenase OS=Mus musculus GN=Aldh1l2 PE=1 SV=2	K.NGLVLFGNDGK.A	0.1011	90.8183	0
Q8K009	Mitochondrial 10-formyltetrahydrofolate dehydrogenase OS=Mus musculus GN=Aldh1l2 PE=1 SV=2	R.ILSNTPVIEDSTDFFK.S	0.03917	96.2306	0
Q8K009	Mitochondrial 10-formyltetrahydrofolate dehydrogenase OS=Mus musculus GN=Aldh1l2 PE=1 SV=2	R.LRGEDEEAEMVVDYVSK.E	0.01973	98.0652	0
Q8K009	Mitochondrial 10-formyltetrahydrofolate dehydrogenase OS=Mus musculus GN=Aldh1l2 PE=1 SV=2	R.LRGEDEEAEMVVDYVSK.E	0.01532	98.4911	0
Q8K009	Mitochondrial 10-formyltetrahydrofolate dehydrogenase OS=Mus musculus GN=Aldh1l2 PE=1 SV=2	R.VSYASLADVDR.A	0.02204	97.8435	0
Q8K009	Mitochondrial 10-formyltetrahydrofolate dehydrogenase OS=Mus musculus GN=Aldh1l2 PE=1 SV=2	K.DAFENGEWGR.M	0.04499	95.6947	0
Q8K009	Mitochondrial 10-formyltetrahydrofolate dehydrogenase OS=Mus musculus GN=Aldh1l2 PE=1 SV=2	K.IQGSTIPINQAR.P	0.01199	98.8152	0
Q8K009	Mitochondrial 10-formyltetrahydrofolate dehydrogenase OS=Mus musculus GN=Aldh1l2 PE=1 SV=2	K.FAELTVK.A	0.07906	92.6733	0
Q8K009	Mitochondrial 10-formyltetrahydrofolate dehydrogenase OS=Mus musculus GN=Aldh1l2 PE=1 SV=2	K.GVINIIPGSGGVAGQR.L	0.03797	96.3419	0
Q8K009	Mitochondrial 10-formyltetrahydrofolate dehydrogenase OS=Mus musculus GN=Aldh1l2 PE=1 SV=2	K.VSLELGGK.S	0.0194	98.0969	0
Q8K009	Mitochondrial 10-formyltetrahydrofolate dehydrogenase OS=Mus musculus GN=Aldh1l2 PE=1 SV=2	R.QVQRPGFFMEPTVFTGVEDHMYLAK.E	0.02602	97.464	0
Q8K009	Mitochondrial 10-formyltetrahydrofolate dehydrogenase OS=Mus musculus GN=Aldh1l2 PE=1 SV=2	R.QVQRPGFFMEPTVFTGVEDHMYLAK.E	0.03834	96.3076	0
Q8K009	Mitochondrial 10-formyltetrahydrofolate dehydrogenase OS=Mus musculus GN=Aldh1l2 PE=1 SV=2	K.EESFGPIMVISK.F	0.05527	94.7625	0
Q8K009	Mitochondrial 10-formyltetrahydrofolate dehydrogenase OS=Mus musculus GN=Aldh1l2 PE=1 SV=2	K.FQNGDIDGVLQR.A	0.03289	96.8157	0
Q8K009	Mitochondrial 10-formyltetrahydrofolate dehydrogenase OS=Mus musculus GN=Aldh1l2 PE=1 SV=2	K.DLGEEALNEYLK.I	0.0575	94.5626	0
P19783	Cytochrome c oxidase subunit 4 isoform 1, mitochondrial OS=Mus musculus GN=Cox4i1 PE=1 SV=2	K.SEDYAFPTYADR.R	0.01311	98.706	0
P19783	Cytochrome c oxidase subunit 4 isoform 1, mitochondrial OS=Mus musculus GN=Cox4i1 PE=1 SV=2	R.DYPLPDVAHVTMLSASQK.A	0.01553	98.4707	0
P19783	Cytochrome c oxidase subunit 4 isoform 1, mitochondrial OS=Mus musculus GN=Cox4i1 PE=1 SV=2	R.DYPLPDVAHVTMLSASQK.A	0.01348	98.6699	0
P19783	Cytochrome c oxidase subunit 4 isoform 1, mitochondrial OS=Mus musculus GN=Cox4i1 PE=1 SV=2	K.ADWSSLSR.D	0.01903	98.1325	0
P19783	Cytochrome c oxidase subunit 4 isoform 1, mitochondrial OS=Mus musculus GN=Cox4i1 PE=1 SV=2	R.IQFNESFAEMNR.G	0.01353	98.6651	0
P19783	Cytochrome c oxidase subunit 4 isoform 1, mitochondrial OS=Mus musculus GN=Cox4i1 PE=1 SV=2	K.ANPIQGFSAK.W	0.01594	98.431	0
P19783	Cytochrome c oxidase subunit 4 isoform 1, mitochondrial OS=Mus musculus GN=Cox4i1 PE=1 SV=2	K.WDYDKNEWK.K	0.00392	99.6095	0
P19783	Cytochrome c oxidase subunit 4 isoform 1, mitochondrial OS=Mus musculus GN=Cox4i1 PE=1 SV=2	K.WDYDKNEWKK.-	1.1504	46.503	0
P19783	Cytochrome c oxidase subunit 4 isoform 1, mitochondrial OS=Mus musculus GN=Cox4i1 PE=1 SV=2	K.WDYDKNEWKK.-	0.00609	99.3947	0
P48036	Annexin A5 OS=Mus musculus GN=Anxa5 PE=1 SV=1	K.GLGTDEDSILNLLTSR.S	0.02426	97.6315	0
P48036	Annexin A5 OS=Mus musculus GN=Anxa5 PE=1 SV=1	R.DLVDDLKSELTGK.F	0.00684	99.3206	0
P48036	Annexin A5 OS=Mus musculus GN=Anxa5 PE=1 SV=1	R.DLVDDLKSELTGKFEK.L	0.02143	97.902	0
P48036	Annexin A5 OS=Mus musculus GN=Anxa5 PE=1 SV=1	R.TPEELSAIK.Q	0.02291	97.7603	0
P48036	Annexin A5 OS=Mus musculus GN=Anxa5 PE=1 SV=1	K.WGTDEEKFITIFGTR.S	0.00685	99.3197	0
P48036	Annexin A5 OS=Mus musculus GN=Anxa5 PE=1 SV=1	K.FITIFGTR.S	0.01472	98.5494	0
P48036	Annexin A5 OS=Mus musculus GN=Anxa5 PE=1 SV=1	R.ETSGNLEQLLLAVVK.S	0.02097	97.9461	0
P48036	Annexin A5 OS=Mus musculus GN=Anxa5 PE=1 SV=1	R.ETSGNLEQLLLAVVK.S	0.02499	97.5619	0
P48036	Annexin A5 OS=Mus musculus GN=Anxa5 PE=1 SV=1	R.SEIDLFNIR.K	0.01536	98.4872	0
P48036	Annexin A5 OS=Mus musculus GN=Anxa5 PE=1 SV=1	K.NFATSLYSMIK.G	0.02593	97.4725	0
P48036	Annexin A5 OS=Mus musculus GN=Anxa5 PE=1 SV=1	T.SLYSMIK.G	0.01189	98.825	0
Q9CQX2	Cytochrome b5 type B OS=Mus musculus GN=Cyb5b PE=1 SV=1	K.VEGSEPSVTYYR.L	0.02869	97.211	0
Q9CQX2	Cytochrome b5 type B OS=Mus musculus GN=Cyb5b PE=1 SV=1	K.RNSAEETWMVIHGR.V	0.11002	90.0885	0
Q9CQX2	Cytochrome b5 type B OS=Mus musculus GN=Cyb5b PE=1 SV=1	R.NSAEETWMVIHGR.V	0.02375	97.6801	0
Q9CQX2	Cytochrome b5 type B OS=Mus musculus GN=Cyb5b PE=1 SV=1	R.NSAEETWMVIHGR.V	0.0196	98.0777	0
Q9CQX2	Cytochrome b5 type B OS=Mus musculus GN=Cyb5b PE=1 SV=1	R.FLSEHPGGEEVLLEQAGADATESFEDVGHSPDAR.E	0.0086	99.1473	0
Q9CQX2	Cytochrome b5 type B OS=Mus musculus GN=Cyb5b PE=1 SV=1	R.FLSEHPGGEEVLLEQAGADATESFEDVGHSPDAR.E	0.01107	98.9051	0
Q9CQX2	Cytochrome b5 type B OS=Mus musculus GN=Cyb5b PE=1 SV=1	K.QYYIGDVHPSDLKPK.G	0.13648	87.991	0
Q9D0J4	ADP-ribosylation factor-like protein 2 OS=Mus musculus GN=Arl2 PE=1 SV=1	K.FNGEDVDTISPTLGFNIK.T	0.01153	98.8601	0
Q9D0J4	ADP-ribosylation factor-like protein 2 OS=Mus musculus GN=Arl2 PE=1 SV=1	R.ELQSLLVEER.L	0.00489	99.5134	0
Q9CPQ1	Cytochrome c oxidase subunit 6C OS=Mus musculus GN=Cox6c PE=1 SV=3	K.AYAEFYR.N	0.01046	98.9648	0
Q9CPQ1	Cytochrome c oxidase subunit 6C OS=Mus musculus GN=Cox6c PE=1 SV=3	R.NYDSMKDFEEMR.K	0.00328	99.6731	0
Q9CPQ1	Cytochrome c oxidase subunit 6C OS=Mus musculus GN=Cox6c PE=1 SV=3	R.NYDSMKDFEEMRK.A	0.00367	99.6343	0
Q9CQF0	39S ribosomal protein L11, mitochondrial OS=Mus musculus GN=Mrpl11 PE=2 SV=1	R.AGQAIPGPPLGPILGQR.G	0.02395	97.661	0
Q9CQF0	39S ribosomal protein L11, mitochondrial OS=Mus musculus GN=Mrpl11 PE=2 SV=1	K.IGQPTVSYFLK.A	0.02693	97.3776	0
Q9CQF0	39S ribosomal protein L11, mitochondrial OS=Mus musculus GN=Mrpl11 PE=2 SV=1	K.DLSAEELEAFQK.E	0.00691	99.3137	0
P61255	60S ribosomal protein L26 OS=Mus musculus GN=Rpl26 PE=1 SV=1	K.ANGTTVHVGIHPSK.V	0.00758	99.2477	0
Q5SX40	Myosin-1 OS=Mus musculus GN=Myh1 PE=2 SV=1	K.RQEAPPHIFSISDNAYQFMLTDR.E	0.00255	99.7456	0
Q5SX40	Myosin-1 OS=Mus musculus GN=Myh1 PE=2 SV=1	K.RQEAPPHIFSISDNAYQFMLTDR.E	0.01402	98.6174	0
Q5SX40	Myosin-1 OS=Mus musculus GN=Myh1 PE=2 SV=1	R.QEAPPHIFSISDNAYQFMLTDR.E	0.01998	98.0411	0
Q5SX40	Myosin-1 OS=Mus musculus GN=Myh1 PE=2 SV=1	R.ENQSILITGESGAGK.T	0.00894	99.1139	0
Q5SX40	Myosin-1 OS=Mus musculus GN=Myh1 PE=2 SV=1	K.MQGTLEDQIISANPLLEAFGNAK.T	0.00917	99.0913	0
Q5SX40	Myosin-1 OS=Mus musculus GN=Myh1 PE=2 SV=1	K.LTGAVMHYGNMK.F	0.02609	97.4573	0
Q5SX40	Myosin-1 OS=Mus musculus GN=Myh1 PE=2 SV=1	K.LTGAVMHYGNMK.F	0.01263	98.7528	0
Q5SX40	Myosin-1 OS=Mus musculus GN=Myh1 PE=2 SV=1	K.AAYLQNLNSADLLK.A	0.00819	99.1877	0
Q5SX40	Myosin-1 OS=Mus musculus GN=Myh1 PE=2 SV=1	K.GQTVQQVYNSVGALAK.A	0.00658	99.3463	0
Q5SX40	Myosin-1 OS=Mus musculus GN=Myh1 PE=2 SV=1	K.MFLWMVTR.I	0.00948	99.0609	0
Q5SX40	Myosin-1 OS=Mus musculus GN=Myh1 PE=2 SV=1	K.LQQFFNHHMFVLEQEEYKK.E	0.00872	99.1355	0
Q5SX40	Myosin-1 OS=Mus musculus GN=Myh1 PE=2 SV=1	K.LQQFFNHHMFVLEQEEYKK.E	0.00253	99.7476	0
Q5SX40	Myosin-1 OS=Mus musculus GN=Myh1 PE=2 SV=1	K.LYEQHLGK.S	0.00608	99.3957	0
Q5SX40	Myosin-1 OS=Mus musculus GN=Myh1 PE=2 SV=1	K.NKDPLNETVVGLYQK.S	0.00106	99.8941	0
Q5SX40	Myosin-1 OS=Mus musculus GN=Myh1 PE=2 SV=1	K.GSSFQTVSALFR.E	0.00805	99.2014	0
Q5SX40	Myosin-1 OS=Mus musculus GN=Myh1 PE=2 SV=1	K.TPGAMEHELVLHQLR.C	0.00365	99.6363	0
Q5SX40	Myosin-1 OS=Mus musculus GN=Myh1 PE=2 SV=1	R.ILYADFK.Q	0.00848	99.1591	0
Q5SX40	Myosin-1 OS=Mus musculus GN=Myh1 PE=2 SV=1	K.VLNASAIPEGQFIDSK.K	0.01031	98.9795	0
Q5SX40	Myosin-1 OS=Mus musculus GN=Myh1 PE=2 SV=1	K.AGLLGLLEEMR.D	0.0094	99.0688	0
Q5SX40	Myosin-1 OS=Mus musculus GN=Myh1 PE=2 SV=1	K.HWPWMK.L	0.00689	99.3157	0
Q5SX40	Myosin-1 OS=Mus musculus GN=Myh1 PE=2 SV=1	K.NDLQLQVQSEADSLADAEER.C	0.01628	98.3981	0
Q5SX40	Myosin-1 OS=Mus musculus GN=Myh1 PE=2 SV=1	K.NLTEEMAGLDETIAK.L	0.01069	98.9423	0
Q5SX40	Myosin-1 OS=Mus musculus GN=Myh1 PE=2 SV=1	K.NLTEEMAGLDETIAK.L	0.00544	99.4589	0
Q5SX40	Myosin-1 OS=Mus musculus GN=Myh1 PE=2 SV=1	K.ALQEAHQQTLDDLQAEEDKVNTLTK.A	0.00039	99.961	0
Q5SX40	Myosin-1 OS=Mus musculus GN=Myh1 PE=2 SV=1	K.LEQQVDDLEGSLEQEKK.I	0.00028	99.972	0
Q5SX40	Myosin-1 OS=Mus musculus GN=Myh1 PE=2 SV=1	K.EFEMSNLQSK.I	0.00618	99.3858	0
Q5SX40	Myosin-1 OS=Mus musculus GN=Myh1 PE=2 SV=1	R.RDLEEATLQHEATAATLR.K	0.00652	99.3522	0
Q5SX40	Myosin-1 OS=Mus musculus GN=Myh1 PE=2 SV=1	R.DLEEATLQHEATAATLR.K	0.01692	98.3362	0
Q5SX40	Myosin-1 OS=Mus musculus GN=Myh1 PE=2 SV=1	R.DLEEATLQHEATAATLR.K	0.01595	98.43	0
Q5SX40	Myosin-1 OS=Mus musculus GN=Myh1 PE=2 SV=1	K.HADSVAELGEQIDNLQR.V	0.04058	96.1003	0
Q5SX40	Myosin-1 OS=Mus musculus GN=Myh1 PE=2 SV=1	K.HADSVAELGEQIDNLQR.V	0.00832	99.1749	0
Q5SX40	Myosin-1 OS=Mus musculus GN=Myh1 PE=2 SV=1	K.MEIDDLASNMEVISK.S	0.00354	99.6472	0
Q5SX40	Myosin-1 OS=Mus musculus GN=Myh1 PE=2 SV=1	R.LINELTAQR.G	0.00673	99.3315	0
Q5SX40	Myosin-1 OS=Mus musculus GN=Myh1 PE=2 SV=1	K.QAFTQQIEELKR.Q	0.02624	97.4431	0
Q5SX40	Myosin-1 OS=Mus musculus GN=Myh1 PE=2 SV=1	K.QAFTQQIEELKR.Q	0.02337	97.7164	0
Q5SX40	Myosin-1 OS=Mus musculus GN=Myh1 PE=2 SV=1	K.ANSEVAQWR.T	0.00951	99.058	0
Q5SX40	Myosin-1 OS=Mus musculus GN=Myh1 PE=2 SV=1	R.LQDAEEHVEAVNAK.C	0.01079	98.9325	0
Q5SX40	Myosin-1 OS=Mus musculus GN=Myh1 PE=2 SV=1	R.LQDAEEHVEAVNAK.C	0.01217	98.7976	0
Q5SX40	Myosin-1 OS=Mus musculus GN=Myh1 PE=2 SV=1	K.NAYEESLDHLETLK.R	0.00517	99.4857	0
Q5SX40	Myosin-1 OS=Mus musculus GN=Myh1 PE=2 SV=1	R.IQLELNQVK.S	0.00727	99.2782	0
Q5SX40	Myosin-1 OS=Mus musculus GN=Myh1 PE=2 SV=1	K.DTQLHLDDALR.G	0.00399	99.6026	0
Q5SX40	Myosin-1 OS=Mus musculus GN=Myh1 PE=2 SV=1	K.DTQLHLDDALR.G	0.08633	92.0531	0
Q5SX40	Myosin-1 OS=Mus musculus GN=Myh1 PE=2 SV=1	R.GQEDLKEQLAMVER.R	0.00971	99.0383	0
Q5SX40	Myosin-1 OS=Mus musculus GN=Myh1 PE=2 SV=1	R.ANLLQAEIEELR.A	0.0137	98.6485	0
Q5SX40	Myosin-1 OS=Mus musculus GN=Myh1 PE=2 SV=1	K.IAEQELLDASER.V	0.0491	95.3198	0
Q5SX40	Myosin-1 OS=Mus musculus GN=Myh1 PE=2 SV=1	R.VQLLHTQNTSLINTK.K	0.01405	98.6145	0
[truncated: 42,495 more rows]
