# Supplementary material for: Selective clearance of the inner nuclear membrane protein emerin by vesicular transport during ER stress
Source: eLife journal article supplement (doi:10.7554/elife.49796), 2019-10-10
Supplement: supp [file elife-49796-supp-v1.zip › elife_poa_e49796_Supplementary_file_1.xlsx]

## Sheet: Table S3. results of half life 
UniprotID	K	Stdev (K)	T1/2 (days)	R2 of fit	decile
A2AGL3	-0.451222	0.00666026	1.53632	0.99935	3
A2AIL4	-0.127661	NA	5.42961	0.992855	9
A2AIV2	-0.978992	0.0913186	0.711115	0.928461	1
A2AMM0	-0.567059	0.0182083	1.22299	0.946646	2
A2AN08	-0.0832433	0.016169	8.60224	0.938633	10
A2APY7	-0.155045	0.142578	7.74565	0.965254	10
A2AQ07	-0.109096	0.0194426	6.47861	0.913054	10
A2AQP0	-0.322371	0.0569024	2.19597	0.980967	5
A2ASS6	-0.413423	0.118898	1.76494	0.977742	4
A2AUC9	-0.409835	0.0312392	1.69995	0.989436	3
A2BE28	-0.302716	0.116479	2.47281	0.961707	6
A6H611	-0.586276	0.0763976	1.19241	0.9372	2
B0V2N1	-1.01558	NA	0.682513	0.987545	1
B1AZI6	-0.731509	0.294283	1.05241	0.951594	1
B2RQC6	-0.0946725	0.0517383	10.2471	0.92787	10
B2RRE7	-0.807039	NA	0.858877	0.896677	1
B2RXS4	-0.477107	0.221618	1.70784	0.979784	3
B2RY56	-0.721342	0.122695	0.982346	0.990144	1
B7ZMP1	-0.320331	0.0495175	2.2051	0.989569	5
B9EHN9	-0.458455	NA	1.51192	0.858635	3
B9EJ80	-0.421125	NA	1.64594	0.938896	3
B9EKI3	-1.17294	0.230866	0.602623	0.929566	1
D3YXK2	-0.910948	0.196078	0.79607	0.961084	1
D3YZG8	-0.237686	NA	2.91623	0.861671	7
D3Z7P3	-0.258509	0.1525	5.70686	0.95821	9
E0CX20	-0.956484	NA	0.724682	0.892035	1
E0CYV9	-0.423005	0.100346	1.68607	0.892967	3
E9PZJ8	-0.086313	NA	8.03062	0.901055	10
E9PZQ0	-0.477742	0.0655945	1.47395	0.979487	3
E9Q0K6	-0.331474	NA	2.0911	0.995924	5
E9Q3E1	-0.585085	NA	1.18469	0.993365	2
E9Q3L2	-0.124589	0.0338926	5.77721	0.929854	9
E9Q401	-0.455932	NA	1.52029	0.999189	3
E9Q555	-0.124934	NA	5.54811	0.958194	9
E9Q5G3	-0.264391	NA	2.62167	0.902216	6
E9Q634	-0.253949	NA	2.72948	0.963223	6
F6ZDS4	-0.548123	0.0717893	1.28322	0.974732	2
F8VPU2	-0.183858	NA	3.77002	0.999404	8
F8VQB6	-0.318573	0.196144	2.68464	0.978869	6
G5E829	-0.392694	0.0491533	1.7922	0.962151	4
G5E870	-0.731875	0.0880018	0.955698	0.898117	1
J3QMK6	-0.554063	0.0438723	1.25496	0.996597	2
O08528	-0.355266	0.0863125	2.07222	0.952473	5
O08532	-0.33647	0.0862636	2.20237	0.975768	5
O08539	-0.373219	0.0492234	1.88728	0.925834	4
O08547	-0.299271	0.0732957	2.43388	0.958314	6
O08553	-0.160413	0.119583	5.98361	0.903549	9
O08579	-0.45972	0.0687314	1.52881	0.935646	3
O08583	-0.378743	0.0744327	1.8899	0.973204	4
O08600	-0.568792	NA	1.21863	0.994843	2
O08601	-0.356603	NA	1.94375	0.999135	4
O08638	-0.188883	0.0884828	4.86117	0.942268	9
O08709	-0.104574	NA	6.62827	0.977116	10
O08749	-0.17541	0.0457016	4.28532	0.953961	8
O08756	-0.229117	0.017092	3.03724	0.954302	7
O08795	-0.325052	0.0349749	2.15224	0.993223	5
O08807	-0.0402212	0.016949	19.058	0.871827	10
O08912	-0.51253	0.440678	2.26366	0.939172	5
O08917	-0.179615	0.0617751	4.26572	0.963224	8
O09005	-0.545826	NA	1.2699	0.844369	2
O09061	-0.247346	NA	2.80234	0.855227	6
O09106	-0.560316	0.0767565	1.24878	0.987465	2
O09111	-0.210972	0.0529072	3.43917	0.960864	7
O09131	-0.0610693	NA	11.3502	0.833401	10
O09161	-0.387556	0.0558451	1.82298	0.980186	4
O09165	-0.349551	0.0412821	2.00184	0.995006	4
O09174	-0.295173	0.0709511	2.62188	0.99476	6
O35074	-0.248945	0.0340198	2.8385	0.942787	6
O35114	-0.216184	0.039983	3.26207	0.989803	7
O35127	-0.34552	0.0578212	2.03459	0.981786	5
O35129	-0.159914	0.0471391	4.83118	0.960124	9
O35143	-0.390986	0.370223	7.21159	0.924103	10
O35166	-0.765163	0.154664	0.928661	0.900445	1
O35218	-1.28212	1.11097	0.865583	0.922418	1
O35226	-0.587385	NA	1.18006	0.996851	2
O35295	-0.267011	0.0589283	2.73627	0.94514	6
O35316	-0.718802	NA	0.964309	0.990231	1
O35326	-0.629589	0.102036	1.12005	0.909989	2
O35405	-0.388864	0.0645513	1.80739	0.964687	4
O35435	-0.259759	0.0463739	2.73445	0.985379	6
O35459	-0.188415	0.0743267	4.54158	0.980426	9
O35465	-0.622058	0.121211	1.14315	0.933804	2
O35593	-0.15449	0.103136	5.85499	0.89737	9
O35638	-0.784112	0.320513	0.980656	0.965095	1
O35658	-0.138594	0.0384173	5.59252	0.981962	9
O35682	-0.213765	NA	3.24257	0.986781	7
O35691	-0.523489	0.166568	1.40733	0.983291	3
O35841	-0.635375	0.104852	1.11404	0.971429	2
O35857	-0.297725	0.0340732	2.35845	0.977541	5
O35887	-0.416712	0.0705409	1.70075	0.964576	3
O35900	-0.279076	NA	2.48372	0.992393	6
O35969	-0.0751529	0.0388997	11.6991	0.916673	10
O35972	-0.0776691	NA	8.92436	0.983529	10
O54692	-0.379517	0.0988679	1.91939	0.929581	4
O54724	-0.571608	0.428069	1.59656	0.923048	3
O54734	-0.234551	0.09684	3.74643	0.987305	8
O54825	-0.0417926	NA	16.5854	0.982237	10
O54890	-0.203273	NA	3.40993	0.933116	7
O54941	-0.765616	0.110937	0.91495	0.97048	1
O54946	-0.627487	0.0393523	1.10682	0.900803	2
O54962	-0.323127	0.00783207	2.14596	0.978131	5
O54984	-0.514498	0.0873615	1.37751	0.936797	2
O54998	-0.507453	NA	1.36593	0.984803	2
O55029	-0.30472	0.175615	2.72769	0.932783	6
O55125	-0.136979	NA	5.06023	0.999759	9
O55126	-0.287137	0.112284	2.63351	0.961944	6
O55137	-0.212258	0.0197513	3.28524	0.992617	7
O55143	-0.591737	0.226111	1.31425	0.974459	2
O55201	-0.113072	NA	6.13011	0.939798	10
O55222	-0.171487	0.0613218	4.50092	0.941852	9
O55240	-0.573429	NA	1.20878	0.998985	2
O55242	-0.0978248	NA	7.0856	0.979822	10
O70133	-0.381108	0.0461944	1.84508	0.979445	4
O70152	-0.503897	NA	1.37557	0.999514	2
O70194	-0.687415	0.284767	1.11449	0.941907	2
O70209	-0.384112	0.108238	1.87915	0.949213	4
O70251	-0.268045	NA	2.58593	0.998576	6
O70305	-0.58585	NA	1.18315	0.984162	2
O70310	-0.395341	0.244926	2.16967	0.990967	5
O70373	-0.554623	0.0998673	1.29408	0.960756	2
O70404	-0.863662	0.29032	0.850627	0.963793	1
O70456	-0.262081	0.0251234	2.65699	0.99239	6
O70492	-0.184405	0.0488056	3.89526	0.905398	8
O70503	-0.336079	0.169531	2.74905	0.929022	6
O70572	-0.417042	0.00353791	1.66212	0.998058	3
O88207	-0.79429	0.306135	0.958809	0.889911	1
O88291	-0.441068	0.044006	1.58255	0.970774	3
O88532	-0.695961	0.0163124	0.996231	0.917348	1
O88569	-0.373614	0.119907	1.96108	0.968039	4
O88587	-0.306385	0.14492	2.71338	0.949535	6
O88630	-0.677534	0.111304	1.03704	0.996896	1
O88693	-0.638935	0.0168894	1.08523	0.904039	2
O88696	-0.245001	0.01332	2.83477	0.995786	6
O88712	-0.292129	0.299586	5.00422	0.945226	9
O88736	-0.487776	0.134187	1.47692	0.994068	3
O88829	-0.746846	0.0523707	0.930386	0.90594	1
O88856	-0.523545	0.35017	2.14192	0.968687	5
O88874	-1.04668	NA	0.662234	0.991635	1
O88967	-0.420171	0.194249	1.95047	0.974008	4
O88983	-0.323009	0.21227	2.73689	0.980363	6
O88986	-0.0678109	0.00424897	10.2419	0.926109	10
O88990	-0.668065	0.261986	1.16628	0.980717	2
O89001	-0.444667	0.119172	1.65107	0.861892	3
O89017	-0.381383	NA	1.81746	0.931216	4
O89079	-0.519328	0.0151254	1.33527	0.993065	2
P00375	-0.171427	NA	4.04339	0.835533	8
P00493	-0.170185	NA	4.0729	0.999685	8
P02463	-0.918342	NA	0.754781	0.884321	1
P02468	-0.114869	0.0485664	6.57305	0.95727	10
P03995	-0.285708	NA	2.42607	0.957948	6
P04627	-0.149296	NA	4.64277	0.979086	9
P04760	-0.794164	NA	0.872801	0.904135	1
P05202	-0.176456	0.0118512	3.94498	0.97598	8
P05213	-0.139093	0.0778878	7.0723	0.872932	10
P05214	-0.131252	0.0899941	7.66806	0.858951	10
P05977	-0.571069	0.134222	1.2597	0.985423	2
P06745	-0.187014	NA	3.70639	0.916263	8
P06802	-0.449986	0.196156	1.70209	0.945471	3
P06869	-0.446952	0.0166125	1.5519	0.860574	3
P07091	-0.255443	0.0946284	3.02045	0.939036	7
P07356	-0.213873	0.0385977	3.59437	0.980319	8
P08003	-0.311655	0.0666823	2.35951	0.960729	5
P08030	-0.0942876	0.0371462	7.96992	0.940635	10
P08074	-0.083426	NA	8.30852	0.937548	10
P08122	-0.122993	NA	5.63567	0.999135	9
P08207	-0.32349	0.0137296	2.14529	0.979274	5
P08228	-0.17072	0.0242981	4.10167	0.964862	8
P08249	-0.157662	0.025277	4.55099	0.968895	9
P08551	-0.26965	0.0901317	2.83007	0.932096	6
P08553	-0.303852	0.0256588	2.28936	0.974244	5
P08752	-0.413502	0.19421	2.01062	0.977172	4
P08775	-0.884782	0.843179	1.43504	0.941021	3
P09041	-0.126986	NA	5.45847	0.812462	9
P09055	-0.371819	0.118739	2.04663	0.940725	5
P09411	-0.177307	0.0847817	4.608	0.89957	9
P09541	-0.814021	0.391281	1.03302	0.952598	1
P09671	-0.197361	0.0261099	3.55604	0.994607	8
P0DM40	-0.220102	NA	3.14921	0.991251	7
P10493	-0.503702	0.266146	1.58955	0.974358	3
P10605	-0.456179	0.263637	1.94152	0.981553	4
P10630	-0.167525	0.0743276	4.80578	0.970602	9
P10649	-0.050104	NA	13.8342	0.803935	10
P10833	-0.336142	0.279747	3.15446	0.995312	7
P10852	-0.159778	0.0460907	4.67068	0.957506	9
P11087	-1.06523	0.0605355	0.652059	0.86175	1
P11103	-0.723718	NA	0.957758	0.99765	1
P11214	-0.470744	NA	1.47245	0.879382	3
P11276	-0.229842	0.0718788	3.22075	0.975896	7
P11499	-0.218777	0.0459561	3.28024	0.910163	7
P11688	-0.275931	0.091765	2.78231	0.905138	6
P11881	-0.666274	0.137283	1.0629	0.874208	1
P11983	-0.362536	0.145548	2.38668	0.945898	5
P12382	-0.0412284	NA	16.8124	0.891628	10
P12787	-0.210832	0.0512207	3.4858	0.959711	8
P12815	-0.278308	0.0481851	2.54778	0.914021	6
P13020	-0.299222	0.0767943	2.61838	0.961759	6
P13541	-0.284906	0.136314	2.64216	0.976715	6
P13542	-0.411609	0.167431	1.85437	0.98508	4
P13595	-0.599148	0.112569	1.19178	0.94483	2
P14115	-0.311453	0.0209089	2.23233	0.953118	5
P14152	-0.192038	0.00296241	3.60986	0.916329	8
P14206	-0.259132	0.086263	3.6707	0.938664	8
P14426	-0.725721	0.039455	0.956529	0.870005	1
P14602	-0.294995	0.114604	2.77924	0.923649	6
P14685	-0.18587	0.0851333	4.44564	0.934818	8
P14733	-0.133389	0.0173094	5.28699	0.962464	9
P14824	-0.22436	0.0346184	3.16737	0.951103	7
P14869	-0.252993	0.0861872	3.21595	0.960447	7
P14873	-0.764925	0.262921	1.00345	0.970065	1
P15532	-0.212494	0.0215675	3.28927	0.982641	7
P15864	-0.220588	0.019077	3.16021	0.983271	7
P16045	-0.251393	0.1119	3.48238	0.960091	8
P16332	-0.542621	0.238683	1.97024	0.939924	4
P16381	-0.748541	0.262084	1.10271	0.960675	2
P16546	-0.362676	0.0606884	1.96611	0.957174	4
P17156	-0.391056	0.0891326	1.85929	0.977541	4
P17182	-0.144227	0.0677475	5.61282	0.920277	9
P17225	-0.347197	0.157557	3.00746	0.98673	7
P17426	-0.467869	0.0669226	1.51395	0.981218	3
P17439	-0.242402	0.0694055	3.01522	0.948372	7
P17665	-0.231981	NA	2.98795	0.998474	7
P17751	-0.126744	0.0534861	6.39145	0.985205	10
P18155	-0.432905	0.259342	3.05841	0.930975	7
P18572	-0.182434	0.0252152	3.83609	0.989386	8
P19096	-0.156588	0.0892929	6.69958	0.917066	10
P19123	-1.41795	NA	0.488836	0.982544	1
P19157	-0.13657	0.0492416	5.42824	0.939239	9
P19253	-0.30506	0.00207587	2.27222	0.994588	5
P19536	-0.230558	0.104492	4.68185	0.964598	9
P19639	-0.050104	NA	13.8342	0.803935	10
P19783	-0.198208	0.0463144	3.65394	0.900635	8
P20029	-0.384227	0.116977	2.15757	0.965082	5
P20060	-0.192733	0.0121986	3.60363	0.990344	8
P20108	-0.170475	0.01891	4.10687	0.93832	8
P20152	-0.309594	0.0742491	5.18635	0.967233	9
P20444	-0.0937866	NA	7.39069	0.998275	10
P21107	-0.76607	0.204226	0.972158	0.970514	1
P21279	-0.430652	0.106137	1.70845	0.961085	3
P21550	-0.176996	0.077644	4.80025	0.93873	9
P21619	-0.184001	0.012751	3.78318	0.970917	8
P21956	-0.295167	0.0334261	2.37571	0.952209	5
P21981	-0.442274	0.0834885	1.60593	0.963469	3
P23475	-0.627991	0.0629963	1.10934	0.959481	2
P23927	-0.30715	0.0750073	2.32607	0.924419	5
P24270	-0.863177	0.178854	0.827983	0.946949	1
P24369	-0.307309	0.0243141	2.26957	0.98539	5
P24452	-0.286523	NA	2.41917	0.91998	5
P26039	-0.405181	0.102863	1.79422	0.960339	4
P26041	-0.234839	0.075138	3.48562	0.92778	8
P26443	-0.200167	0.0346833	3.62508	0.965571	8
P26883	-0.360833	0.200797	2.27289	0.975906	5
P27046	-0.40729	0.0771471	1.77025	0.991432	4
P27546	-0.620622	0.244831	1.22	0.99317	2
P27601	-0.797747	NA	0.868881	0.920497	1
P27641	-0.736584	0.317467	1.03738	0.987565	1
P27661	-0.143929	0.0133271	4.8515	0.928992	9
P27773	-0.309671	0.0666235	2.53279	0.981118	6
P28028	-0.149296	NA	4.64277	0.979086	9
P28271	-0.204141	0.080548	3.70907	0.951047	8
P28352	-0.412479	NA	1.68044	1	3
P28653	-0.232113	NA	2.98625	0.894633	7
P28659	-0.326483	NA	2.12307	0.994103	5
P28663	-0.696214	0.219505	1.04767	0.873025	1
P30412	-0.411174	0.100098	1.76693	0.992317	4
P30677	-0.498532	0.153901	1.54396	0.977117	3
P30999	-0.745794	0.316094	1.19798	0.966043	2
P31230	-0.464702	NA	1.49159	0.998738	3
P31254	-0.137591	0.0214985	5.10001	0.929048	9
P31324	-0.0768528	NA	9.01915	0.82668	10
P32020	-0.548501	0.0894058	1.29024	0.974	2
P33146	-0.533781	0.133074	1.34021	0.928648	2
P33267	-1.90307	NA	0.364226	0.963037	1
P34884	-0.0624097	0.00817209	11.2024	0.843941	10
P35279	-0.391752	0.0441794	1.78068	0.992496	4
P35283	-0.193443	NA	3.5832	0.805366	8
P35293	-0.430128	0.201609	2.00499	0.983158	4
P35486	-0.255252	0.0743644	2.97892	0.93383	7
P35550	-0.24012	0.0719727	3.33383	0.963924	7
P35564	-0.355317	0.148688	2.42104	0.963322	5
P35762	-0.394677	NA	1.75624	0.955423	4
P36536	-0.284549	0.193525	3.27423	0.957858	7
P36552	-0.584562	0.310074	1.38857	0.91284	3
P37040	-0.406057	0.0773536	1.78243	0.962038	4
P38060	-0.257726	0.0284226	2.70593	0.842661	6
P38647	-0.253711	0.114349	4.30043	0.966605	8
P39447	-0.748326	0.0778012	0.933359	0.96038	1
P39688	-1.09926	0.831064	0.882867	0.895523	1
P40237	-0.303316	0.0138872	2.28844	0.92767	5
P40630	-0.140868	0.0177624	4.9882	0.98551	9
P41216	-0.377089	0.0796155	1.91244	0.982292	4
P42125	-0.174972	0.0137812	3.9824	0.994753	8
P42208	-0.350752	0.23599	3.5881	0.93223	8
P42669	-0.311317	0.0247997	2.2364	0.934525	5
P43024	-0.354738	0.0241998	1.96044	0.98231	4
P43274	-0.203787	0.026793	3.46576	0.978941	7
P43275	-0.229291	0.0168649	3.0339	0.960042	7
P43276	-0.133117	0.00737956	5.21969	0.945725	9
P43406	-0.311159	0.0836886	2.39269	0.961543	5
P45377	-0.0851414	NA	8.14113	0.812666	10
P45878	-0.38214	0.0848923	1.87077	0.989408	4
P45952	-0.262294	0.0720127	3.37965	0.987308	7
P46425	-0.101751	NA	6.81219	0.909802	10
P46460	-0.249475	0.104072	3.32378	0.96161	7
P46471	-0.299631	0.0751836	2.43481	0.937006	6
P46660	-0.303852	0.0256588	2.28936	0.974244	5
P46935	-0.128533	0.0854439	7.30268	0.959396	10
P47757	-0.406373	0.0528578	1.72673	0.915714	4
P47758	-0.642571	NA	1.07871	0.971675	2
P47857	-0.212101	0.0862558	3.72063	0.98782	8
P47880	-0.462401	NA	1.49902	0.998228	3
P47911	-0.297727	0.03188	2.35365	0.932166	5
P47934	-0.273602	0.0607534	2.70882	0.988087	6
P47963	-0.333905	0.00345203	2.07603	0.99242	5
P48036	-0.213782	0.0376413	3.35261	0.947267	7
P48410	-0.399205	NA	1.73632	0.99821	4
P48678	-0.310079	0.0316612	2.26163	0.987088	5
P48722	-0.0646842	NA	10.7159	0.842579	10
P48771	-0.277115	NA	2.5013	0.988219	6
P48962	-0.178073	0.0618107	4.38015	0.969431	8
P48999	-0.237426	0.0591295	3.07733	0.975862	7
P49070	-0.622189	NA	1.11405	0.993374	2
P49586	-0.302395	0.0329135	2.30585	0.964172	5
P49813	-0.591146	0.0597058	1.18198	0.978898	2
P49817	-0.198034	0.188329	6.3894	0.8925	10
P50171	-0.269129	0.0134617	2.57875	0.999925	6
P50285	-0.245651	NA	2.82168	0.992934	6
P50396	-0.102716	0.00512356	6.75661	0.938326	10
P50516	-0.208622	0.0817422	3.88934	0.966931	8
P50518	-0.340165	0.140693	2.36127	0.994225	5
P50543	-0.336039	NA	2.0627	0.998317	5
P50544	-0.372046	0.266322	2.52086	0.971015	6
P51150	-0.561117	0.148666	1.40143	0.962798	3
P51174	-0.256795	0.0412262	2.75635	0.971279	6
P51175	-0.208528	0.0716252	3.62926	0.976407	8
P51410	-0.219396	0.120852	4.83004	0.958744	9
P51660	-0.529647	0.170017	1.43452	0.982097	3
P51859	-0.338303	NA	2.04889	0.956725	5
P51863	-0.18161	0.0746797	4.38907	0.966058	8
P51881	-0.154159	0.0527586	4.95326	0.944097	9
P52019	-1.27629	NA	0.543095	0.921463	1
P52196	-0.437622	NA	1.58389	0.9762	3
P52432	-0.638801	NA	1.08508	0.917562	2
P52480	-0.14112	0.0979459	7.46937	0.887488	10
P52503	-0.440055	0.0964912	1.61393	0.992147	3
P52825	-0.213286	0.0409907	3.36387	0.964442	7
P52875	-0.546302	NA	1.2688	0.991461	2
P52927	-0.137524	NA	5.0402	0.986876	9
P53395	-0.133397	0.023474	5.27784	0.998716	9
P53702	-0.35451	0.0559608	1.97989	0.995606	4
P53994	-0.388646	0.137978	2.07234	0.967412	5
P53995	-0.0733106	0.0271675	10.152	0.960727	10
P54071	-0.210052	0.0470211	3.40565	0.960697	7
P54116	-0.270393	0.0366078	2.60055	0.941772	6
P54822	-0.117838	NA	5.88222	0.924199	9
P54823	-0.965569	0.255147	0.753164	0.98384	1
P55065	-0.389404	0.146677	1.93976	0.983815	4
P56135	-0.170849	0.0502757	4.24068	0.854686	8
P56380	-0.207003	NA	3.34849	0.998313	7
P56391	-0.371987	0.0248422	1.86913	0.984125	4
P56399	-0.137372	0.0596188	6.13803	0.959379	10
P56480	-0.192596	0.0674879	3.95607	0.955539	8
P57759	-0.322476	0.0717755	2.26813	0.973295	5
P57780	-0.362238	0.0516354	1.95052	0.971135	4
P57784	-0.292484	0.0375804	2.38959	0.983985	5
P58044	-0.209967	0.125288	4.01622	0.883789	8
P58059	-0.102891	NA	6.73674	0.994669	10
P58281	-0.352197	0.0610253	2.02068	0.990256	4
P58742	-0.744107	NA	0.931516	0.986911	1
P58774	-0.834835	0.313329	0.926242	0.9731	1
P59708	-0.674477	NA	1.02768	0.986243	1
P60229	-0.564741	0.408977	1.66361	0.961481	3
P60335	-0.27882	0.135943	2.82134	0.980517	6
P60766	-0.236768	NA	2.92754	0.919493	7
P60867	-0.150968	NA	4.59136	0.99802	9
P60904	-0.273396	NA	2.53533	0.998197	6
P61022	-0.472291	NA	1.46763	0.90017	3
P61161	-0.351469	0.0217814	1.97735	0.950303	4
P61164	-0.170984	0.0365846	4.14885	0.958566	8
P61226	-0.381338	0.0249026	1.82155	0.997502	4
P61255	-0.334398	NA	2.07282	0.999952	5
P61294	-0.416823	0.0259587	1.66616	0.998273	3
P61358	-0.378614	0.0477463	1.85227	0.966231	4
P61620	-0.220628	0.168899	4.3181	0.986037	8
P61750	-0.110028	0.0112881	6.34822	0.91874	10
P61804	-0.366592	NA	1.89079	0.998211	4
P61979	-0.434806	0.145195	1.84438	0.978755	4
P61982	-0.229656	0.0589046	3.17327	0.985067	7
P62071	-0.216492	0.115112	3.75505	0.969899	8
P62073	-0.241304	NA	2.8725	0.816439	6
P62075	-0.639861	0.0254311	1.08442	0.987204	2
P62137	-0.496028	0.345474	3.09212	0.976435	7
P62141	-0.268933	0.317859	5.80289	0.976796	9
P62192	-0.268749	0.0180505	2.588	0.8639	6
P62196	-0.210492	0.0823621	3.91624	0.923581	8
P62242	-0.368028	0.0602167	1.91823	0.949823	4
P62264	-0.287299	0.0942215	2.75781	0.979242	6
P62270	-0.281949	0.12291	3.39551	0.951575	7
P62274	-0.323632	NA	2.14177	0.979753	5
P62281	-0.196466	0.17599	5.83989	0.96226	9
P62305	-0.337689	NA	2.05262	0.999042	5
P62309	-0.287524	NA	2.41074	0.97777	5
P62313	-0.241986	NA	2.86441	0.999384	6
P62315	-0.275026	0.0561767	2.60211	0.921033	6
P62317	-0.309688	0.0458647	2.27213	0.987132	5
P62320	-0.256046	0.0015313	2.70717	0.942839	6
P62334	-0.139891	0.0397475	5.36668	0.909743	9
P62492	-0.538641	0.123329	1.35619	0.952741	2
P62631	-0.261046	0.164271	4.48032	0.876646	8
P62702	-0.212288	0.0958842	4.04149	0.95548	8
P62717	-0.325532	0.016826	2.13311	0.954807	5
P62737	-0.375805	0.116749	2.10141	0.980224	5
P62746	-0.711486	NA	0.974225	0.995091	1
P62748	-0.261475	NA	2.65092	0.994086	6
P62806	-0.119372	0.00776941	5.82922	0.946556	9
P62814	-0.347243	0.0505746	2.02772	0.986163	4
P62827	-0.146984	0.0303645	4.81863	0.88771	9
P62830	-0.213422	0.0885588	3.55372	0.986004	8
P62835	-0.372052	0.0651238	1.91242	0.950674	4
P62843	-0.327005	0.0195801	2.12349	0.940245	5
P62852	-0.333933	0.00386076	2.07592	0.994929	5
P62855	-0.3508	NA	1.97591	0.99639	4
P62892	-0.371739	NA	1.86461	0.986653	4
P62908	-0.284514	0.11583	4.13412	0.960547	8
P62911	-0.311868	0.0478412	2.2601	0.930716	5
P62918	-0.579033	0.445565	1.57909	0.95545	3
P62983	-0.195828	NA	3.53957	0.987948	8
P62996	-0.290977	0.0392033	2.40396	0.93837	5
P63024	-0.441612	0.0559963	1.58571	0.976387	3
P63038	-0.161631	0.0739211	7.0746	0.955664	10
P63085	-0.278654	0.00149548	2.48752	0.987794	6
P63094	-0.537253	0.228764	1.55745	0.971319	3
P63101	-0.214577	0.0576588	3.41468	0.95787	7
P63154	-0.295331	NA	2.34702	0.976559	5
P63168	-0.356996	NA	1.94161	0.970725	4
P63321	-0.51554	0.108985	1.40147	0.969586	3
P63323	-0.330398	0.0540978	2.12642	0.993314	5
P67778	-0.100564	0.0416629	7.60417	0.92512	10
P67984	-0.263422	0.0535148	2.73161	0.991819	6
P68040	-0.171399	0.11123	5.11242	0.94938	9
P68134	-0.382078	0.130891	2.10235	0.975312	5
P68181	-0.108319	0.0470697	7.06627	0.921641	10
P68368	-0.147429	0.0802816	6.49584	0.888609	10
P68369	-0.139093	0.0778878	7.0723	0.872932	10
P68372	-0.110958	0.0316417	6.86829	0.880592	10
P68510	-0.220546	0.0741026	3.452	0.975455	7
P70206	-0.536179	0.434125	1.9231	0.944035	4
P70227	-0.508574	0.203891	1.62628	0.956351	3
P70245	-0.221209	NA	3.13345	0.983905	7
P70255	-0.994149	NA	0.697226	0.996584	1
P70271	-0.48789	0.192167	1.54017	0.942433	3
P70275	-0.22353	0.0321725	3.13337	0.995435	7
P70288	-0.479489	0.292541	2.17186	0.956542	5
P70302	-0.581829	0.0672925	1.20187	0.973625	2
P70333	-0.264787	0.0536809	2.68993	0.941412	6
P70336	-0.224055	0.0666023	3.23665	0.989587	7
P70349	-0.133828	NA	5.17938	0.938981	9
P70388	-0.28038	0.100177	2.64072	0.938162	6
P70398	-0.140583	0.0174202	4.96865	0.861709	9
P70402	-0.556801	NA	1.24487	0.99742	2
P70404	-0.291523	0.264644	4.04402	0.987863	8
P70452	-0.462953	0.231142	1.7751	0.940043	4
P70670	-0.574859	0.227452	1.38378	0.958526	3
P70698	-0.145514	0.0293825	4.86257	0.929078	9
P70699	-0.201541	0.0778761	3.7167	0.997017	8
P80314	-0.47579	0.170886	1.6802	0.976284	3
P80316	-0.309375	0.181417	3.47977	0.941189	7
P80318	-0.272718	0.137218	3.24456	0.970367	7
P81117	-0.347686	0.0695128	2.06989	0.978273	5
P84084	-0.101416	NA	6.8347	0.94851	10
P84096	-0.523198	NA	1.32483	0.951514	2
P84228	-0.129708	0.00263003	5.34499	0.94087	9
P86048	-0.205109	NA	3.37941	0.979112	7
P97287	-0.743234	NA	0.93261	0.868047	1
P97324	-0.0377042	NA	18.3838	0.968472	10
P97346	-0.144118	0.0577361	5.22922	0.842008	9
P97363	-0.737138	0.214681	0.981967	0.857593	1
P97384	-0.204709	0.0988727	4.01802	0.962515	8
P97429	-0.155872	0.0221663	4.52056	0.94291	9
P97449	-0.214596	0.0435667	3.35023	0.955927	7
P97450	-0.186682	0.0788222	4.63438	0.927	9
P97457	-0.363505	0.0391358	1.92774	0.991824	4
P97464	-0.190439	NA	3.63974	0.98294	8
P97467	-0.659918	NA	1.05035	0.997954	1
P97478	-0.321762	0.0569263	2.18847	0.925511	5
P97493	-0.413287	0.0179257	1.67961	0.983049	3
P97807	-0.196851	0.0477659	3.93103	0.967353	8
P97855	-0.435183	0.0511352	1.60983	0.943136	3
P97868	-0.909348	NA	0.762246	0.985046	1
P97930	-0.28164	NA	2.46111	0.849572	6
P98063	-0.325526	NA	2.12932	0.998182	5
P99024	-0.104895	0.032177	7.28274	0.889367	10
P99027	-0.381784	0.0616756	1.84976	0.965749	4
P99028	-0.132839	NA	5.21795	0.911791	9
Q00PI9	-0.36858	0.129884	2.05105	0.958911	5
Q01320	-0.831862	0.261776	0.902398	0.942287	1
Q01768	-0.229722	0.0180761	3.03217	0.977624	7
Q01853	-0.462185	0.0947659	1.57572	0.975326	3
Q02013	-0.215569	0.13075	3.94021	0.903782	8
Q02053	-0.129372	0.0366636	5.73668	0.893295	9
Q02248	-0.704307	0.151665	1.03258	0.94468	1
Q02257	-0.463762	0.092695	1.53478	0.951611	3
Q02566	-0.362931	0.0828975	1.99754	0.987303	4
Q02819	-0.459159	0.0524206	1.5278	0.980614	3
Q03145	-0.666057	0.0794945	1.04814	0.992825	1
Q03265	-0.190007	0.0842933	4.30873	0.971959	8
Q04447	-0.145304	NA	4.77033	0.951337	9
Q04750	-0.667371	0.038764	1.04091	0.992154	1
Q04857	-0.803845	NA	0.86229	0.907513	1
Q05144	-0.26059	NA	2.65991	0.93799	6
Q05186	-0.371966	0.0725489	1.93119	0.961618	4
Q05793	-0.306093	0.172116	2.56666	0.952146	6
Q05920	-0.344475	0.0443649	2.04576	0.990896	5
Q05D44	-0.493872	0.0365964	1.40935	0.968917	3
Q06185	-0.1652	0.0358212	4.3513	0.967973	8
Q07079	-0.46302	0.0589901	1.50926	0.91566	3
Q07133	-0.212574	0.00357725	3.26134	0.975612	7
Q07417	-0.208334	0.0166258	3.34303	0.994267	7
Q0GNC1	-0.344119	0.33559	3.84051	0.919477	8
Q11011	-0.26995	0.144129	3.74824	0.969653	8
Q14AX6	-0.128112	NA	5.41049	0.982622	9
Q14C51	-0.285194	0.0805389	2.53138	0.888653	6
Q14CH7	-0.360477	0.11671	2.35191	0.932367	5
Q1HFZ0	-0.130557	0.0114815	5.32978	0.881601	9
Q1XH17	-0.456927	0.0582671	1.53978	0.981169	3
Q2KN98	-0.861828	NA	0.804275	0.883147	1
Q2TPA8	-0.265294	0.134954	3.45654	0.968999	7
Q32MW3	-0.180872	0.0404357	4.15799	0.955653	8
Q3KNM2	-0.501957	NA	1.38089	0.983839	2
Q3MI48	-0.463601	0.160567	1.62282	0.978464	3
Q3SXD3	-0.238307	NA	2.90863	0.963861	6
Q3TBW2	-0.139553	0.098478	6.61361	0.995894	10
Q3TC46	-0.209295	NA	3.31181	0.996464	7
Q3TC72	-0.25609	NA	2.70665	0.998761	6
Q3TCH7	-0.215635	NA	3.21444	0.969349	7
Q3TCN2	-0.219817	0.0354798	3.20919	0.957902	7
Q3TDN2	-0.428468	0.198771	2.17024	0.92689	5
Q3TDQ1	-0.391279	0.0461318	1.78906	0.968617	4
Q3TEA8	-0.519398	0.185108	1.499	0.992248	3
Q3THE2	-0.520781	0.144687	1.41139	0.994829	3
Q3THK7	-0.0241848	NA	28.6604	0.882598	10
Q3TIX9	-0.629111	0.235963	1.18515	0.987731	2
Q3TJD7	-0.46333	0.107212	1.55838	0.991204	3
Q3TJZ6	-0.50427	NA	1.37456	0.885426	2
Q3TKT4	-0.666452	0.262939	1.21978	0.956563	2
Q3TLP5	-0.0271874	NA	25.4952	0.999076	10
Q3TLX0	-0.230654	NA	3.00514	0.979587	7
Q3TMP8	-0.485472	NA	1.42778	0.967234	3
Q3TMX7	-0.223636	0.144243	3.91346	0.965097	8
Q3TPJ5	-0.211214	NA	3.28172	0.908404	7
Q3TRM4	-0.481677	0.0474192	1.44869	0.943957	3
Q3TVI8	-0.621119	0.193349	1.22433	0.920916	2
Q3TW96	-0.234971	0.0679507	3.07866	0.95381	7
Q3TWW8	-0.668959	0.0711912	1.0443	0.963252	1
Q3TXS7	-0.128839	0.0523045	6.19251	0.952089	10
Q3TZZ7	-0.392131	0.0840822	1.91595	0.9564	4
Q3U0V1	-0.713372	NA	0.97165	0.976399	1
Q3U0V2	-0.0580199	0.0163614	12.4414	0.946764	10
Q3U186	-0.281772	0.207881	4.28887	0.974302	8
Q3U1J4	-0.46021	0.121845	1.61289	0.957988	3
Q3U6U5	-0.19167	NA	3.61635	0.95322	8
Q3U7R1	-0.318355	0.0449356	2.21791	0.967546	5
Q3U962	-0.935967	0.62962	0.957126	0.869023	1
Q3U9G9	-0.190345	0.0271852	3.69348	0.957818	8
Q3UEB3	-0.882047	0.551679	0.982595	0.918347	1
Q3UGP8	-0.146726	NA	4.7241	0.896865	9
Q3UHB1	-0.259169	0.0390029	2.72886	0.964194	6
Q3UJB9	-0.527164	0.0817344	1.33086	0.948407	2
Q3UJU9	-0.459747	0.0617523	1.5313	0.979043	3
Q3UKJ7	-0.847725	0.122958	0.828389	0.970164	1
Q3ULD5	-0.247385	0.161607	3.98118	0.955059	8
Q3ULJ0	-0.230518	0.13089	3.58479	0.983139	8
Q3UM45	-0.125701	NA	5.51427	0.816187	9
Q3UMB9	-0.0696165	NA	9.95666	0.997365	10
Q3UMR5	-0.137183	0.0167702	5.11703	0.972227	9
Q3UN02	-0.447173	NA	1.55006	0.996236	3
Q3UPH1	-0.354661	NA	1.95439	0.980322	4
Q3UQ84	-0.341088	0.0290483	2.03956	0.998697	5
Q3URQ0	-0.275289	0.100564	2.77816	0.945134	6
Q3URS9	-0.138525	NA	5.00377	0.928597	9
Q3USZ8	-0.0899583	NA	7.70521	0.999905	10
Q3UVK0	-0.291756	0.214979	3.21793	0.925084	7
Q3UVL4	-0.0995924	NA	6.95984	0.914743	10
Q3UX10	-0.118512	0.102374	9.3296	0.881616	10
Q3V009	-0.234303	0.157432	3.82083	0.986068	8
Q3V132	-0.113998	0.0108294	6.11733	0.941093	10
Q3V3R1	-0.160452	0.0781265	7.19145	0.956614	10
Q3ZK22	-0.523908	NA	1.32303	0.998563	2
Q499X7	-0.305277	0.0247893	2.27807	0.984429	5
Q499X9	-0.334843	0.007451	2.07058	0.980873	5
Q4FK66	-1.20593	NA	0.574782	0.824056	1
Q4FZC9	-0.345529	0.29044	4.34611	0.894036	8
Q4PJX1	-0.538645	NA	1.28684	0.856951	2
Q4PZA2	-0.234765	NA	2.95251	0.826603	7
Q4VA53	-0.446988	0.168916	1.85021	0.95383	4
Q4VAE3	-0.236781	0.0388225	2.96726	0.898714	7
Q4VBD2	-0.616581	NA	1.12418	0.991048	2
Q4VBE8	-0.32299	0.145912	2.52638	0.970934	6
Q501J6	-0.613231	0.143451	1.23574	0.975613	2
Q505D7	-0.196155	0.146787	4.99773	0.926017	9
Q505N7	-0.181038	0.112498	6.36777	0.963267	10
Q52KR3	-0.149973	NA	4.62182	0.956105	9
Q566J8	-0.527832	NA	1.3132	0.998559	2
Q569Z5	-0.530351	0.251527	1.71045	0.952491	3
Q569Z6	-0.625565	0.180917	1.19724	0.95338	2
Q59J78	-0.349727	0.0554676	2.00721	0.985709	4
Q5EG47	-0.176488	0.0903507	4.51972	0.973658	9
Q5F2E8	-0.70796	NA	0.979077	0.991265	1
Q5H8C4	-0.469126	0.0610998	1.49582	0.977674	3
Q5HZI9	-0.283387	0.083271	2.57266	0.944008	6
Q5RKZ7	-0.294502	NA	2.35362	0.986647	5
Q5SF07	-0.367015	NA	1.88861	0.988528	4
Q5SQX6	-0.308641	0.266776	3.36401	0.954023	7
Q5SS80	-0.154177	NA	4.49579	0.966439	9
Q5SSK3	-0.0952795	NA	7.27488	0.997782	10
Q5SSZ5	-0.187165	0.0511091	3.84682	0.940439	8
Q5SUF2	-0.463939	0.0642801	1.50853	0.984239	3
Q5SWU9	-0.106508	0.0620131	8.32774	0.888822	10
Q5SX39	-0.436749	0.179795	1.7432	0.985932	4
Q5SX40	-0.458106	0.184529	1.67483	0.980105	3
Q5U458	-0.253993	NA	2.729	0.9616	6
Q5XG71	-0.718422	0.452872	1.19852	0.938239	2
Q60597	-0.207571	0.0869259	3.9367	0.95627	8
Q60605	-0.378868	0.084351	1.89731	0.969768	4
Q60668	-0.263906	0.021497	2.64119	0.975157	6
Q60715	-0.503722	0.185	1.72293	0.948176	4
Q60716	-0.314075	0.266879	6.00199	0.978083	9
Q60737	-0.613731	0.108454	1.15168	0.977627	2
Q60749	-0.492101	0.0903153	1.4471	0.945484	3
Q60759	-0.28667	0.00531055	2.41835	0.997486	5
Q60770	-0.427794	0.147279	1.76017	0.951227	4
Q60817	-0.35508	0.119378	2.06902	0.961936	5
Q60847	-0.848055	0.284671	0.92946	0.879476	1
Q60864	-0.377295	0.262282	2.42249	0.957155	5
Q60865	-0.655524	0.172546	1.11383	0.900517	2
Q60930	-0.158497	0.0655807	4.95101	0.962681	9
Q60936	-0.533816	0.0527161	1.30651	0.922781	2
Q60953	-0.285033	0.104672	2.60765	0.937804	6
Q60960	-0.669694	NA	1.03502	0.89368	1
Q61001	-0.0847789	0.0157715	8.4389	0.961267	10
Q61029	-0.356522	0.159157	2.13658	0.963158	5
Q61033	-0.37504	0.150185	2.03006	0.968398	4
Q61102	-0.141849	0.0870484	6.04917	0.931892	9
Q61136	-0.766763	0.134075	0.921667	0.963202	1
Q61171	-0.213548	NA	3.24586	0.936844	7
Q61191	-0.617934	0.0918206	1.13424	0.970532	2
Q61206	-0.124589	NA	5.56346	0.970371	9
Q61263	-0.367864	0.333845	3.20341	0.97528	7
Q61292	-0.7264	NA	0.954223	0.989974	1
Q61301	-0.649705	0.141676	1.10197	0.892982	2
Q61335	-0.418707	0.0940259	1.71586	0.946339	3
Q61390	-0.400125	NA	1.73233	0.880826	4
Q61425	-0.232269	0.0202379	3.00108	0.968657	7
Q61550	-1.00563	0.120316	0.694232	0.939122	1
Q61553	-0.0912541	0.0457679	8.77899	0.954859	10
Q61576	-0.420283	0.207986	2.37312	0.958691	5
Q61578	-0.260118	0.0494459	2.73968	0.942267	6
Q61584	-0.641625	0.359069	1.30468	0.909479	2
Q61595	-0.741789	0.402257	1.07396	0.97792	1
Q61686	-0.843491	0.228485	0.853058	0.988697	1
Q61687	-0.804976	NA	0.861078	0.997585	1
Q61699	-0.0929577	NA	7.45658	0.935216	10
Q61733	-0.185624	0.0931171	4.75727	0.845232	9
Q61738	-0.418734	0.157481	1.82113	0.910778	4
Q61753	-0.107486	0.0185626	6.59293	0.873287	10
Q61768	-0.234118	0.106327	3.84108	0.97689	8
Q61820	-0.125513	NA	5.52252	0.820098	9
Q61990	-0.276379	0.121312	2.99354	0.985159	7
Q62000	-0.423313	NA	1.63743	0.998578	3
Q62048	-0.13107	NA	5.28836	0.888334	9
Q62086	-0.548979	0.050811	1.2695	0.937546	2
Q62087	-0.102643	0.0126506	6.82508	0.960007	10
Q62093	-0.342291	0.0178468	2.02778	0.988759	4
Q62095	-0.727544	0.289506	1.16814	0.955373	2
Q62148	-0.411993	NA	1.68242	0.999897	3
Q62159	-0.492106	0.318522	2.50958	0.932562	6
Q62181	-0.411669	0.246619	2.88131	0.984652	6
Q62189	-0.487877	0.041	1.42945	0.978744	3
Q62203	-0.594445	0.0645394	1.17295	0.932312	2
Q62234	-0.415792	0.101221	1.73161	0.989483	4
Q62241	-0.670858	0.0418353	1.03524	0.981425	1
Q62261	-0.552574	0.133232	1.3114	0.971207	2
Q62318	-0.446035	0.182402	2.00585	0.986025	4
Q62351	-0.322886	0.110382	2.43702	0.916854	6
Q62376	-0.440696	0.0481862	1.58668	0.988363	3
Q62417	-0.549045	0.113088	1.33099	0.980345	2
Q62425	-0.59181	0.140346	1.20512	0.96531	2
Q62446	-0.509822	0.0695547	1.37236	0.970385	2
Q62448	-0.549692	0.434039	2.20421	0.981632	5
Q62470	-0.31094	0.0553193	2.28419	0.954133	5
Q63829	-0.221502	NA	3.12931	0.96913	7
Q63886	-0.0804626	NA	8.61453	0.971387	10
Q63918	-0.59246	0.167467	1.21863	0.997197	2
Q640M1	-0.822084	NA	0.843159	0.942923	1
Q640N1	-0.463842	0.382081	2.26167	0.946028	5
Q640P2	-0.212896	NA	3.2558	0.983952	7
Q64151	-0.079063	NA	8.76702	0.997537	10
Q64152	-0.51498	NA	1.34597	0.998052	2
Q641P0	-0.163053	NA	4.25106	0.953493	8
Q64337	-0.4411	NA	1.57141	0.929732	3
Q64433	-0.168016	0.0161812	4.16236	0.974608	8
Q64435	-0.342049	0.369939	4.88141	0.897172	9
Q64449	-0.401531	0.00281979	1.72631	0.926845	4
Q64475	-0.151136	0.0136468	4.61269	0.921953	9
Q64511	-0.624306	0.120876	1.1448	0.949379	2
Q64521	-0.0892056	0.0287444	8.49896	0.947393	10
Q64522	-0.145605	0.0142373	4.79973	0.937762	9
Q64727	-0.330417	0.0327978	2.11685	0.990081	5
Q64737	-0.213633	NA	3.24458	0.955384	7
Q65Z40	-0.0908568	NA	7.629	0.999149	10
Q66GT5	-0.146332	0.0366189	4.88992	0.911577	9
Q68FL6	-0.528015	0.130475	1.35408	0.99344	2
Q69ZN7	-0.315733	0.1501	2.47294	0.957218	6
Q6A026	-0.874687	NA	0.792452	0.900022	1
Q6A068	-0.76545	0.163856	0.940589	0.967379	1
Q6A0A2	-0.232403	NA	2.98253	0.983481	7
Q6A0A9	-0.414793	0.094743	1.72805	0.942785	4
Q6DFW4	-0.190258	0.0411582	3.77744	0.961876	8
Q6DFX2	-0.666735	0.14007	1.06307	0.998516	1
Q6DID3	-0.865629	0.788191	2.00015	0.969372	4
Q6DVA0	-0.280518	0.08704	2.67556	0.994899	6
Q6DYE8	-0.237344	0.0230796	2.93431	0.999508	7
Q6GQT9	-0.206668	0.0997335	3.98316	0.957845	8
Q6GU68	-0.305927	NA	2.26573	0.991702	5
Q6IRU2	-0.193162	0.0314771	3.65705	0.964429	8
Q6KCD5	-0.657477	0.247262	1.13448	0.994198	2
Q6NS46	-0.704497	0.350661	1.47497	0.924314	3
Q6NSU3	-0.940249	0.322673	0.783322	0.930884	1
Q6NV83	-0.49205	NA	1.40869	0.966183	3
Q6NWW9	-1.16083	0.116558	0.600137	0.90681	1
Q6P069	-0.160576	0.0851291	5.02242	0.893428	9
Q6P4T2	-0.655963	0.276586	1.186	0.965651	2
Q6P542	-0.737513	0.269325	1.03832	0.963693	1
Q6P5B0	-0.279953	0.0403949	2.51572	0.966995	6
Q6P5D8	-0.851518	0.156885	0.840177	0.934615	1
Q6P5E4	-0.269067	0.0817228	3.23802	0.970365	7
Q6P5F7	-0.105999	NA	6.5392	0.902853	10
Q6P5F9	-0.0724722	NA	9.56431	0.963805	10
Q6P5H2	-0.472086	0.117596	1.56645	0.969694	3
Q6P8X1	-0.145279	NA	4.77115	0.886665	9
Q6P9J9	-0.674837	0.42682	1.27438	0.93925	2
Q6P9R1	-0.635404	NA	1.09088	0.973926	2
Q6P9Z1	-0.559424	0.111098	1.26396	0.97471	2
Q6PA06	-0.380938	0.275241	2.46231	0.978682	6
Q6PAL7	-1.06613	NA	0.650152	0.895575	1
Q6PB66	-0.267023	0.10856	4.42468	0.97697	8
Q6PCP5	-0.692763	0.200395	1.04424	0.981059	1
Q6PDG5	-0.588513	0.225111	1.28501	0.987574	2
Q6PDI5	-0.144137	0.0629639	5.31615	0.872325	9
Q6PDL0	-0.463405	NA	1.49577	0.965923	3
Q6PDM2	-0.344499	0.0198715	2.01776	0.989519	4
Q6PE01	-0.452719	0.40879	2.05026	0.971489	5
Q6PFD9	-0.303563	0.337491	16.2585	0.98089	10
Q6PFR5	-0.346185	0.0842171	2.0633	0.921883	5
Q6PGB8	-0.53943	0.445184	1.8963	0.929253	4
Q6PGC1	-0.408159	0.151126	1.97235	0.966648	4
Q6PIC6	-0.41835	0.126287	1.76118	0.966214	4
Q6R891	-0.606984	NA	1.14195	0.978787	2
Q6URW6	-0.202545	0.0602461	3.67656	0.964858	8
Q6ZPE2	-0.194919	0.101907	4.11903	0.999633	8
Q6ZPR5	-0.214734	0.0592695	3.45636	0.935559	7
Q6ZQ38	-0.158761	0.157282	7.01985	0.909303	10
Q6ZQ58	-0.883896	0.526393	1.54308	0.963879	3
Q6ZQI3	-0.169609	0.0759931	4.61933	0.965878	9
Q6ZQL4	-0.506089	0.479923	2.48855	0.931906	6
Q6ZWN5	-0.198137	0.140143	5.29533	0.982706	9
Q6ZWQ7	-0.225222	0.0959943	3.70145	0.982685	8
Q6ZWR6	-0.392041	0.141519	1.89127	0.989415	4
Q6ZWU9	-0.275408	0.199176	3.40803	0.993832	7
Q6ZWV3	-0.318873	0.109908	2.31102	0.996988	5
Q6ZWV7	-0.241661	0.13062	3.35893	0.995881	7
Q6ZWX6	-0.434519	0.0707707	1.63007	0.96352	3
Q71LX4	-0.262692	0.0587849	2.76624	0.963149	6
Q78IK2	-0.395626	0.0111551	1.75297	0.962903	4
Q78IK4	-0.222262	0.044552	3.2439	0.985579	7
Q791T5	-0.162343	0.0197233	4.30139	0.927224	8
Q791V5	-0.229026	0.058663	3.23147	0.991755	7
Q7TMB8	-0.2942	0.20209	3.18906	0.96679	7
Q7TMF3	-0.301085	0.0313899	2.32229	0.967553	5
Q7TMK9	-0.42867	0.108593	1.77477	0.949662	4
Q7TMM9	-0.113945	0.0332152	6.70379	0.88993	10
Q7TMV3	-0.337143	0.308757	3.54076	0.965902	8
Q7TMY7	-0.129999	NA	5.33196	0.835716	9
Q7TNV0	-0.543866	0.0551286	1.28468	0.984639	2
Q7TPD0	-0.893918	0.524204	0.995425	0.926605	1
Q7TPR4	-0.339314	0.069719	2.11948	0.96192	5
Q7TPV4	-0.55313	0.22048	1.77716	0.941505	4
Q7TPW1	-0.589125	NA	1.17657	0.925205	2
Q7TQ48	-0.516415	0.0959362	1.38023	0.97891	2
Q7TQ95	-0.442633	0.0450847	1.5781	0.989943	3
Q7TQI3	-0.126769	0.0197986	5.53531	0.97701	9
Q7TSQ8	-0.324692	0.0293082	2.14803	0.995211	5
Q80SY5	-0.498079	0.00523174	1.39172	0.939114	3
Q80TL7	-0.125121	NA	5.53981	0.890424	9
Q80TM9	-0.446854	0.313419	2.05718	0.952506	5
Q80U35	-0.268588	NA	2.58071	0.949766	6
Q80U93	-0.503668	NA	1.3762	0.912603	2
Q80U95	-0.135325	NA	5.12211	0.889913	9
Q80UG5	-0.273071	0.192617	3.37895	0.957919	7
Q80UU9	-0.39764	0.0476718	1.76168	0.968627	4
Q80V26	-0.311327	0.214497	2.9193	0.958246	7
Q80VA0	-0.421245	NA	1.64547	0.999643	3
Q80VD1	-0.364833	0.0408712	1.9119	0.988219	4
Q80VI1	-0.545576	NA	1.27049	0.950414	2
Q80W00	-0.922007	NA	0.751781	0.914454	1
Q80W54	-0.27602	0.0859355	2.83293	0.940061	6
Q80WJ7	-0.618232	0.174735	1.19928	0.98743	2
Q80WS3	-0.17077	0.107526	5.06251	0.910001	9
Q80X50	-0.94884	NA	0.73052	0.96503	1
Q80X82	-0.593364	0.144589	1.21952	0.916412	2
Q80X85	-0.254777	NA	2.7206	0.864233	6
Q80X90	-0.34062	0.108292	2.2633	0.949052	5
Q80X95	-0.320049	NA	2.16575	0.810489	5
Q80Y14	-0.327688	NA	2.11527	0.990273	5
Q80YD1	-0.314751	0.0597368	2.27209	0.974199	5
Q80ZJ1	-0.36373	NA	1.90567	0.997889	4
Q80ZS3	-0.229158	NA	3.02475	0.991417	7
Q810A7	-0.840827	NA	0.824363	0.900217	1
Q810S1	-0.0904417	0.0228745	8.01118	0.936054	10
Q811Q9	-0.325346	NA	2.13049	0.93921	5
Q811S7	-0.752419	NA	0.921226	0.971334	1
Q811U4	-0.759648	NA	0.912459	0.96866	1
Q8BFP9	-0.430637	0.0299031	1.61348	0.992538	3
Q8BFQ4	-0.620843	NA	1.11646	0.993828	2
Q8BFR4	-0.191195	0.00695235	3.62773	0.993594	8
Q8BFR5	-0.240435	0.0406444	2.9496	0.954446	7
Q8BFY6	-0.328236	0.12238	2.26948	0.966443	5
Q8BFY9	-0.148496	0.0132362	4.69358	0.956694	9
Q8BFZ3	-0.257006	0.129761	6.54997	0.974745	10
Q8BFZ9	-0.228634	0.124899	3.79192	0.960157	8
Q8BG51	-0.373487	0.0524885	1.88284	0.916318	4
Q8BG67	-0.533304	0.165292	1.3653	0.939055	2
Q8BGC0	-0.792446	NA	0.874694	0.996957	1
Q8BGC4	-0.248048	0.0695962	3.03882	0.988381	7
Q8BGH2	-0.100904	0.0147878	6.97705	0.941834	10
Q8BGP6	-0.260016	NA	2.66578	0.903332	6
Q8BGS0	-0.771	0.753004	1.71875	0.949519	3
Q8BGT5	-0.403108	0.286916	3.74683	0.972097	8
Q8BGX2	-0.378771	NA	1.82999	0.948978	4
Q8BH04	-0.113815	0.076821	13.1977	0.965744	10
Q8BH24	-0.394193	0.0439962	1.77324	0.988584	4
Q8BH55	-0.264494	NA	2.62066	0.974966	6
Q8BH59	-0.218711	0.0427589	3.30122	0.94582	7
Q8BH64	-0.539591	0.561038	2.30802	0.932089	5
Q8BH74	-0.183453	0.0724806	4.16911	0.930548	8
Q8BH79	-0.367421	NA	1.88652	0.999625	4
Q8BH86	-0.256955	0.0246251	2.71375	0.950873	6
Q8BH95	-0.25178	0.0226932	2.77039	0.969423	6
Q8BHC4	-0.330284	0.096767	2.33468	0.982368	5
Q8BHC9	-0.500008	0.103542	1.41665	0.92597	3
Q8BHF7	-0.274584	0.234654	3.97633	0.988679	8
Q8BHN3	-0.318132	0.068827	2.5386	0.986538	6
Q8BHS6	-0.154894	NA	4.47497	0.854084	8
Q8BI84	-0.498291	0.237526	1.6269	0.986165	3
Q8BIG7	-0.290153	0.0358327	2.40726	0.988644	5
Q8BIJ6	-0.265663	0.0122785	2.61403	0.981147	6
Q8BIP0	-0.365677	0.00294707	1.89558	0.958847	4
Q8BJ03	-0.234955	0.0433445	3.02407	0.9851	7
Q8BJ71	-0.148625	0.0213956	4.76928	0.957364	9
Q8BJS4	-0.284383	0.215336	2.89618	0.961724	6
Q8BJW6	-0.46443	0.0376413	1.50026	0.984868	3
Q8BJZ4	-0.0972994	NA	7.12386	0.83596	10
Q8BK08	-0.230385	0.109772	3.3939	0.957167	7
Q8BK30	-0.281515	NA	2.46221	0.989237	6
Q8BK64	-0.153516	NA	4.51513	0.939312	9
Q8BK67	-0.606379	NA	1.14309	0.892639	2
Q8BK72	-0.182727	0.171097	6.75423	0.948178	10
Q8BKE6	-0.424647	0.0922366	1.72078	0.974951	4
Q8BKS9	-1.04731	0.513441	0.752229	0.937131	1
Q8BKT7	-0.370771	0.111225	2.00412	0.967716	4
Q8BKZ9	-0.225835	0.115997	4.39803	0.945903	8
Q8BL97	-0.278074	0.0267551	2.51204	0.987909	6
Q8BLF1	-0.322281	0.13793	2.56618	0.950673	6
Q8BLN5	-0.731134	NA	0.948044	0.992572	1
Q8BM55	-0.670875	0.348626	1.29262	0.973737	2
Q8BM72	-0.839188	0.269096	0.870741	0.942241	1
Q8BMA6	-0.179884	0.0401961	4.00042	0.982885	8
Q8BMD8	-0.135231	0.0486741	5.6693	0.944868	9
Q8BMF3	-0.280349	NA	2.47244	0.999577	6
Q8BMF4	-0.172111	0.0637156	4.64953	0.941811	9
Q8BMJ2	-0.259825	0.16821	4.18487	0.978958	8
Q8BMK4	-0.223783	0.0526513	3.28907	0.93232	7
Q8BMP6	-0.500433	NA	1.38509	0.973306	3
Q8BMS1	-0.23701	0.0519843	3.06821	0.947228	7
Q8BN21	-0.173948	0.0185652	4.00762	0.978808	8
Q8BP40	-0.25281	0.0342644	2.77778	0.985174	6
Q8BP67	-0.366592	NA	1.89079	0.994995	4
Q8BP71	-0.563179	0.378013	1.58864	0.891793	3
Q8BP92	-0.364185	0.0270501	1.91203	0.994276	4
Q8BQ47	-0.366241	0.0297439	1.89886	0.943839	4
Q8BR63	-0.584407	NA	1.18607	0.996747	2
Q8BRF7	-0.421184	0.178825	1.92315	0.944125	4
Q8BRH0	-0.160931	0.00457634	4.30886	0.953545	8
Q8BSL7	-0.137353	0.0508227	5.41732	0.939677	9
Q8BT60	-0.161414	0.0133007	4.30886	0.978818	8
Q8BTI8	-0.938896	0.413723	0.844711	0.953718	1
Q8BTM8	-0.291141	0.0793779	2.72778	0.94849	6
Q8BTS4	-0.422611	0.175171	1.8078	0.942229	4
Q8BTV2	-0.541147	0.0357007	1.285	0.98527	2
Q8BTW3	-0.195087	0.0161901	3.5653	0.957551	8
Q8BTX9	-0.145045	NA	4.77883	0.992327	9
Q8BU14	-0.812711	0.484833	1.06952	0.890051	1
Q8BU21	-0.365602	0.107175	1.98103	0.837597	4
Q8BU30	-0.298053	0.138606	3.66942	0.930275	8
Q8BU33	-0.400527	0.127611	1.92729	0.97456	4
Q8BU88	-0.225547	0.177732	4.45698	0.963669	8
Q8BVA5	-0.518407	0.15204	1.39716	0.9194	3
Q8BVI4	-0.241957	NA	2.86476	0.965842	6
Q8BWM0	-0.321125	0.063493	2.23606	0.948639	5
Q8BWT1	-0.179945	0.0362082	4.1377	0.945813	8
Q8BX02	-0.612045	0.131614	1.17442	0.961224	2
Q8BX10	-0.376543	0.0790357	1.88228	0.983437	4
Q8BXA1	-0.624832	0.106344	1.12564	0.907261	2
Q8BXZ1	-0.546648	0.150765	1.33098	0.97592	2
Q8BYB9	-0.423186	0.0926281	1.70223	0.990632	3
Q8BYL4	-0.353305	0.371344	4.38278	0.971149	8
Q8BYU6	-0.215299	NA	3.21946	0.979714	7
Q8BZF8	-0.426953	0.212342	3.55827	0.940414	8
Q8C0C7	-0.381012	0.0532711	1.83719	0.947241	4
Q8C0I1	-0.292405	0.124189	3.1881	0.959209	7
Q8C0L0	-0.570183	0.260447	1.46755	0.986204	3
Q8C0Z1	-0.566278	NA	1.22404	0.991941	2
Q8C129	-0.276051	0.124637	2.88724	0.957729	6
Q8C1B7	-0.270416	0.178746	3.27977	0.945463	7
Q8C2E7	-0.116755	0.0455512	6.4258	0.957558	10
Q8C2Q3	-0.311214	0.0327469	2.24606	0.982868	5
Q8C3X2	-0.238759	0.110258	3.33677	0.933467	7
Q8C3X8	-0.228677	0.13876	4.05275	0.949806	8
Q8C4J7	-0.256207	NA	2.70542	0.990715	6
Q8C522	-0.286259	NA	2.4214	0.849829	5
Q8C570	-0.391149	0.0766548	1.80677	0.891153	4
Q8C5Q4	-0.758381	NA	0.913982	0.983193	1
Q8C6I2	-1.01824	0.771968	0.955262	0.902009	1
Q8C7E7	-0.671411	NA	1.03237	0.998178	1
Q8C7E9	-0.5003	NA	1.38546	0.992654	3
Q8C7K6	-0.382302	NA	1.81309	0.937249	4
Q8C7R4	-0.0767064	NA	9.03637	0.992191	10
Q8C7V8	-0.442909	0.0724909	1.59105	0.966924	3
Q8C7X2	-0.45999	0.197995	1.93978	0.933436	4
Q8C854	-0.373243	0.069068	1.90032	0.972349	4
Q8C9B9	-1.41676	NA	0.489247	0.971107	1
Q8CAK1	-0.24752	NA	2.80037	0.891942	6
Q8CAQ8	-0.218242	0.0376062	3.2573	0.948114	7
Q8CC88	-0.335954	0.103401	2.4105	0.967896	5
Q8CCF0	-0.496817	NA	1.39518	0.998068	3
Q8CCJ3	-0.683601	0.495777	1.37578	0.985267	2
Q8CCK0	-0.205776	0.0225245	3.38876	0.988094	7
Q8CD10	-0.762374	0.651653	1.35283	0.956727	2
Q8CE21	-0.87758	NA	0.78984	0.987957	1
Q8CEE7	-0.179729	NA	3.85662	0.844419	8
Q8CFD4	-0.367762	NA	1.88477	0.965122	4
Q8CFE6	-0.457318	0.0668841	1.53206	0.856193	3
Q8CFI5	-0.199916	0.0955616	3.91439	0.978456	8
Q8CFI7	-0.607845	0.166384	1.18472	0.990616	2
Q8CFQ3	-0.464569	0.206798	1.70705	0.949187	3
Q8CG76	-0.333888	0.0878561	2.16425	0.914745	5
Q8CGB6	-0.699249	0.903156	2.32485	0.96717	5
Q8CGC7	-0.303161	0.112238	2.93885	0.9746	7
Q8CGK3	-0.222056	0.0615137	3.62291	0.940682	8
Q8CGP5	-0.145747	0.0147602	4.79691	0.933098	9
Q8CGY8	-0.914051	0.197931	0.776531	0.829088	1
Q8CH18	-0.596688	0.0367635	1.165	0.994819	2
Q8CHT0	-0.261702	0.0177236	2.65838	0.97652	6
Q8CI43	-0.272395	0.0726273	2.6855	0.964917	6
Q8CIB5	-0.138144	NA	5.01758	0.805694	9
Q8CIG8	-0.0906968	NA	7.64247	0.943611	10
Q8CIM3	-0.284133	0.0670341	2.57658	0.96254	6
Q8CIM8	-0.478111	0.340385	1.94189	0.949617	4
Q8CJF7	-0.432946	0.215468	1.8273	0.99342	4
Q8CJG0	-0.193364	0.0172422	3.59899	0.946276	8
Q8JZM7	-0.83257	NA	0.832539	0.926849	1
Q8JZN5	-0.179403	0.0849804	5.09089	0.961925	9
Q8JZN7	-0.389968	NA	1.77745	0.990972	4
Q8JZQ2	-0.316016	NA	2.19339	0.879758	5
Q8JZQ9	-0.385453	0.243896	3.01786	0.906571	7
Q8JZU0	-0.236052	0.0022592	2.93656	0.915588	7
Q8JZU2	-0.199299	0.123805	4.30941	0.966579	8
Q8JZX4	-0.591586	NA	1.17168	0.97013	2
Q8K009	-0.119267	0.0577399	9.43987	0.954901	10
Q8K013	-0.30409	NA	2.27941	0.998259	5
Q8K019	-0.517886	0.103269	1.37873	0.993124	2
Q8K0C4	-1.09727	0.95137	1.01213	0.94633	1
Q8K0D5	-0.439718	0.294886	3.70742	0.950327	8
Q8K0L9	-0.399723	0.0349443	1.74315	0.937496	4
Q8K0U4	-0.115496	0.032754	6.2529	0.866682	10
Q8K0Z7	-0.538293	0.112876	1.31662	0.961832	2
Q8K114	-0.477081	0.178234	1.56189	0.958186	3
Q8K1A6	-0.617179	0.51352	1.71765	0.84848	3
Q8K1C0	-0.198417	0.119955	4.27453	0.881905	8
Q8K1J6	-0.40663	0.229568	2.99179	0.996042	7
Q8K1N1	-0.363264	0.0601604	1.93464	0.995154	4
Q8K1R3	-0.263683	0.029597	2.65976	0.989912	6
Q8K1Z0	-0.375932	0.158961	2.18716	0.993493	5
Q8K224	-0.350649	0.105241	2.06999	0.956842	5
Q8K268	-0.106733	NA	6.49421	0.982632	10
Q8K273	-0.499977	NA	1.38636	0.99409	3
Q8K297	-0.535815	0.0814192	1.31909	0.97514	2
Q8K2B3	-0.23899	0.111404	3.96947	0.986228	8
Q8K2C7	-0.28358	NA	2.44427	0.999622	6
Q8K2C9	-0.400867	NA	1.72912	0.97211	4
Q8K2F0	-0.978804	0.306739	0.744726	0.977742	1
Q8K2J7	-0.778873	NA	0.889937	0.960069	1
Q8K2M0	-0.0861161	0.0071369	8.07673	0.995173	10
Q8K2V6	-0.0407365	NA	17.0154	0.948525	10
Q8K2Y7	-0.350355	NA	1.97841	0.959038	4
Q8K2Z4	-0.0996422	NA	6.95636	0.999958	10
Q8K327	-0.639577	NA	1.08376	0.939785	2
Q8K363	-0.377572	0.0189306	1.83811	0.903362	4
Q8K370	-0.333822	0.0268491	2.08708	0.981765	5
Q8K3A0	-0.306119	NA	2.2643	0.968758	5
Q8K3H0	-0.0338972	NA	20.4485	0.824732	10
Q8K411	-0.154073	0.124117	10.0078	0.924711	10
Q8K4F5	-0.231476	0.0167432	3.00527	0.967131	7
Q8K4P0	-0.65409	0.248889	1.14242	0.989461	2
Q8K4X7	-0.531387	0.0230158	1.3062	0.968603	2
Q8K4Z3	-0.213835	NA	3.24151	0.995751	7
Q8K4Z5	-0.4954	0.09181	1.44759	0.98059	3
Q8K5B2	-0.479561	0.0373472	1.45163	0.933609	3
Q8N7N5	-0.226811	0.0827417	3.27391	0.982881	7
Q8QZS1	-0.221842	0.0624198	3.69867	0.975882	8
Q8QZT1	-0.228313	0.030144	3.07827	0.981914	7
Q8QZY1	-0.458381	0.186408	1.76284	0.988443	4
Q8QZY9	-0.611078	0.0792921	1.14393	0.988185	2
Q8R010	-0.0739387	NA	9.37462	0.961612	10
Q8R035	-0.089672	0.0110374	7.78881	0.914677	10
Q8R081	-0.356269	0.0618621	2.00396	0.960384	4
Q8R086	-0.450524	0.171755	1.6737	0.919767	3
Q8R0F8	-0.203293	NA	3.4096	0.999926	7
Q8R0G9	-0.123481	0.0474421	6.29037	0.870845	10
Q8R0W0	-0.42816	0.0131394	1.61993	0.951777	3
Q8R0Y6	-0.137212	NA	5.05166	0.997137	9
Q8R105	-0.694727	NA	0.997727	0.90287	1
Q8R127	-0.311514	0.0690675	2.32582	0.930081	5
Q8R164	-0.266544	0.0264253	2.61771	0.979614	6
Q8R1B4	-0.611697	0.0814535	1.14602	0.9971	2
Q8R1F1	-0.267538	0.204965	3.43501	0.934022	7
Q8R1G6	-0.462209	0.124984	1.55654	0.946285	3
Q8R1I1	-0.193919	0.00906051	3.57832	0.985753	8
Q8R1M2	-0.145747	0.0147602	4.79691	0.933098	9
Q8R1S0	-0.297461	NA	2.33021	0.97515	5
Q8R1V4	-0.31045	0.0194777	2.23712	0.997307	5
Q8R2N2	-0.528384	NA	1.31182	0.882171	2
Q8R2Q4	-0.37601	0.33658	3.95897	0.935459	8
Q8R2R6	-0.922027	NA	0.751764	0.899874	1
Q8R2U0	-0.2867	0.0414015	2.44912	0.84322	6
Q8R2Y0	-0.434679	0.128695	1.71295	0.992953	3
Q8R2Y8	-0.28091	0.0421425	2.51078	0.930685	6
Q8R326	-0.481807	0.0679464	1.45309	0.959839	3
Q8R3F5	-0.2996	0.0680504	2.41874	0.980764	5
Q8R3K3	-0.70132	NA	0.988347	0.901737	1
Q8R3P6	-0.312089	0.13405	2.44669	0.990608	6
Q8R3Q6	-0.171306	0.0257908	4.09264	0.983298	8
Q8R404	-0.274267	NA	2.52727	0.996746	6
Q8R422	-0.160599	NA	4.31602	0.956518	8
Q8R429	-0.425479	0.0416421	1.64415	0.992019	3
Q8R480	-0.0742035	NA	9.34116	0.950446	10
Q8R4N0	-0.208721	0.0162206	3.33792	0.986534	7
Q8R4R6	-0.236022	0.035355	2.97012	0.888956	7
Q8R5C5	-0.145114	NA	4.77656	0.999791	9
Q8R5J9	-0.538876	0.051199	1.29506	0.979746	2
Q8VBT0	-0.114855	NA	6.035	0.981464	9
Q8VBZ3	-0.160019	NA	4.33165	0.995562	8
Q8VC70	-0.855165	NA	0.810542	0.947622	1
Q8VCB1	-0.105685	NA	6.55861	0.893034	10
Q8VCE6	-0.277799	NA	2.49514	0.954543	6
Q8VCF0	-0.165552	NA	4.18688	0.99459	8
Q8VCH6	-0.537551	0.0173959	1.29013	0.940132	2
Q8VCH8	-0.737982	0.0148753	0.939437	0.9738	1
Q8VCM4	-0.267729	0.099021	2.77907	0.901784	6
Q8VCM8	-0.148207	0.0882738	6.02685	0.957746	9
Q8VCS3	-0.302499	0.20483	2.97295	0.913589	7
Q8VCW8	-0.245897	0.119976	5.67758	0.982231	9
Q8VCX5	-0.623537	0.10805	1.14645	0.94186	2
Q8VCY6	-0.119687	NA	5.79131	0.865355	9
Q8VD75	-1.09497	NA	0.63303	0.978744	1
Q8VDD5	-0.216789	0.096124	4.09741	0.949032	8
Q8VDD9	-0.550858	0.325087	1.52362	0.960359	3
Q8VDK1	-0.287631	0.057427	2.46987	0.988783	6
Q8VDM6	-0.705472	0.00916292	0.982613	0.930293	1
Q8VDN2	-0.347253	0.0628244	2.06897	0.970689	5
Q8VDP3	-0.156126	NA	4.43966	0.997102	8
Q8VDP4	-0.379644	0.245256	2.30723	0.976285	5
Q8VDP6	-0.326423	0.000630545	2.12347	0.997804	5
Q8VDT9	-0.125372	NA	5.52872	0.965527	9
Q8VDW0	-0.159289	NA	4.3515	0.996056	8
Q8VE22	-0.237319	0.0481862	3.01349	0.945708	7
Q8VE80	-0.540001	0.308527	1.53398	0.95188	3
Q8VE91	-0.665705	NA	1.04122	0.913441	1
Q8VEH3	-0.55874	NA	1.24055	0.958437	2
Q8VEH6	-0.130444	NA	5.31374	0.957491	9
Q8VEH8	-0.194284	0.038912	3.65857	0.945988	8
Q8VEM8	-0.197242	0.0514703	3.75737	0.977362	8
Q8VHE0	-0.71796	NA	0.965439	0.933394	1
Q8VHK9	-0.285489	NA	2.42793	0.997362	6
Q8VHN8	-0.749807	NA	0.924434	0.891251	1
Q8VHR5	-0.873796	NA	0.79326	0.898387	1
Q8VHX6	-0.334042	0.0696754	2.15105	0.970653	5
Q8VI56	-0.297062	NA	2.33334	0.986158	5
Q8VI75	-0.110448	NA	6.27575	0.888914	10
Q8VIJ6	-0.35869	0.0916608	2.05042	0.958272	5
Q91V01	-0.184271	NA	3.76156	0.945118	8
Q91V12	-0.208589	0.0161996	3.33309	0.904069	7
Q91V61	-0.186923	0.0301059	3.8018	0.962016	8
Q91VA6	-0.63798	0.144374	1.11502	0.940193	2
Q91VC3	-0.381237	0.189999	2.46058	0.975229	6
Q91VC9	-0.444822	NA	1.55826	0.991755	3
Q91VD9	-0.242443	0.0813373	3.09758	0.953213	7
Q91VE0	-0.965209	0.419587	0.793066	0.927477	1
Q91VH6	-0.0497828	NA	13.9234	0.879716	10
Q91VI7	-0.0985492	0.00133246	7.03438	0.851496	10
Q91VM5	-0.273915	0.0246947	2.54912	0.962637	6
Q91VM9	-0.235669	0.0140463	2.94995	0.941082	7
Q91VR5	-0.450584	0.104503	1.62244	0.948099	3
Q91VT4	-0.298701	NA	2.32054	0.91737	5
Q91VX2	-1.07585	NA	0.644279	0.984408	1
Q91VX9	-0.384512	0.026087	1.80683	0.996699	4
Q91W39	-0.475086	0.226468	1.64601	0.958961	3
Q91W90	-0.392301	0.107413	1.85848	0.944601	4
Q91W97	-0.183139	0.0382607	3.86924	0.985478	8
Q91WD5	-0.251079	0.111266	3.10981	0.977622	7
Q91WK1	-0.247291	NA	2.80296	0.999011	6
Q91WM1	-0.417257	NA	1.6612	0.972442	3
Q91WM2	-0.261256	NA	2.65314	0.998246	6
Q91WQ3	-0.366436	NA	1.89159	0.999954	4
Q91WS0	-0.218345	0.0201635	3.19193	0.971742	7
Q91X78	-0.136645	NA	5.0726	0.976946	9
Q91X88	-1.65138	NA	0.419737	0.967029	1
Q91XC9	-0.767214	NA	0.90346	0.846116	1
Q91XL3	-0.439069	NA	1.57867	0.906402	3
Q91XV3	-0.363137	0.0168645	1.91199	0.996736	4
Q91YE8	-0.690183	0.223504	1.07831	0.986578	1
Q91YH5	-0.505282	0.0935875	1.40388	0.962272	3
Q91YJ5	-0.338057	0.00961863	2.05122	0.97276	5
Q91YM4	-0.326196	0.208093	8.23957	0.979152	10
Q91YN9	-0.36151	0.0632236	1.94714	0.994573	4
Q91YP0	-0.292707	0.0462164	2.40728	0.951517	5
Q91YP2	-0.242704	0.0990006	3.89999	0.97027	8
Q91YR1	-0.32434	NA	2.1371	0.976507	5
Q91YR7	-0.767104	0.368147	1.35014	0.95452	2
Q91YT0	-0.256784	0.0827544	2.93725	0.961254	7
Q91YW3	-0.465747	0.169842	1.83271	0.983829	4
Q91Z31	-0.631312	NA	1.09795	0.914702	2
Q91Z49	-0.421126	NA	1.64594	0.897486	3
Q91Z53	-0.286011	NA	2.4235	0.972635	6
Q91ZA3	-0.141613	0.0757737	6.11183	0.964409	9
Q91ZE0	-0.368303	0.0916144	1.97518	0.947333	4
Q91ZU6	-0.757366	NA	0.915207	0.991937	1
Q91ZW2	-0.483375	0.10455	1.46832	0.971309	3
Q91ZW3	-0.594774	0.324031	1.54713	0.943611	3
Q91ZX7	-0.383663	0.176544	2.19351	0.918341	5
Q920A7	-0.216439	0.15435	4.29451	0.958879	8
Q920B9	-0.645973	0.43708	1.92396	0.976181	4
Q920L1	-0.621418	0.565987	1.90599	0.88488	4
Q921G7	-0.21604	0.078292	3.72573	0.956302	8
Q921H8	-0.409761	0.106007	1.93257	0.958524	4
Q921H9	-0.364816	NA	1.89999	0.996051	4
Q921M3	-0.375194	0.111367	2.21278	0.962836	5
Q921N6	-0.210177	NA	3.29793	0.977641	7
Q921Q7	-0.225684	NA	3.07132	0.9854	7
Q921S7	-0.126182	0.0762943	7.21434	0.963575	10
Q921T2	-0.343774	0.0817232	2.10718	0.985502	5
Q921Y2	-0.302694	NA	2.28992	0.961451	5
Q922B1	-0.347072	0.0266995	2.00305	0.97798	4
Q922D8	-0.157337	0.0479952	4.72522	0.956694	9
Q922F4	-0.130361	0.0310857	5.61597	0.907664	9
Q922H2	-0.406773	0.110115	1.76883	0.957865	4
Q922J9	-0.275301	0.167035	3.06877	0.958395	7
Q922K7	-1.04896	0.643418	1.16366	0.976016	2
Q922P9	-0.50861	0.0445121	1.36807	0.949711	2
Q922Q1	-0.325383	0.148976	2.47927	0.931298	6
Q922Q8	-0.410852	0.0429024	1.70338	0.98212	3
Q922R8	-0.331778	0.0604247	2.18333	0.981623	5
Q922U1	-0.526545	NA	1.31641	0.941866	2
Q922V4	-0.86802	NA	0.798538	0.999625	1
Q922W5	-0.197019	0.0861169	4.61133	0.975286	9
Q922Y1	-0.119001	0.0385054	6.14651	0.907199	10
Q923D4	-0.410337	0.0168524	1.69064	0.993472	3
Q923T9	-0.294372	0.133826	2.79638	0.989197	6
Q924D0	-0.268471	NA	2.58183	0.944549	6
Q924L1	-0.217212	NA	3.19111	0.939756	7
Q924T2	-0.12646	0.11124	8.65775	0.952066	10
Q924Z4	-0.248843	NA	2.78548	0.983289	6
Q925E7	-0.0783694	NA	8.84462	0.977685	10
Q925I1	-0.118536	0.0259751	6.06195	0.962211	9
Q99J39	-0.300819	0.00946949	2.30534	0.963742	5
Q99J56	-0.782498	NA	0.885813	0.948093	1
Q99J93	-0.206751	NA	3.35256	0.936019	7
Q99JB2	-0.13512	0.0540702	5.80346	0.911903	9
Q99JB8	-0.690738	0.0826632	1.01256	0.998099	1
Q99JF8	-0.52355	0.115118	1.37027	0.990307	2
Q99JI4	-0.193171	0.0303879	3.63321	0.915801	8
Q99JI6	-0.428134	0.117439	1.721	0.959463	4
Q99JR1	-0.122312	0.0709654	9.05478	0.937877	10
Q99JR8	-0.480866	NA	1.44146	0.99832	3
Q99JX7	-0.657107	0.117788	1.07894	0.96227	2
Q99JY0	-0.248527	0.0646429	2.96563	0.959674	7
Q99K01	-0.125088	NA	5.54127	0.935125	9
Q99K23	-0.482734	NA	1.43588	0.998605	3
Q99K74	-0.313722	NA	2.20943	0.961765	5
Q99KC8	-0.371462	0.153552	2.04032	0.999554	5
Q99KE1	-0.243263	0.0828481	4.16529	0.973404	8
Q99KG3	-0.687873	NA	1.00767	0.920643	1
Q99KI0	-0.222019	0.0567155	3.71651	0.972877	8
Q99KI3	-0.650186	0.253056	1.24504	0.925805	2
Q99KJ8	-0.406623	0.158331	1.84447	0.995077	4
Q99KK2	-0.378429	0.0299048	1.83738	0.999808	4
Q99KK9	-0.41082	0.0216372	1.69073	0.997006	3
Q99KP6	-0.46202	0.084895	1.57922	0.948157	3
Q99KR7	-0.249929	NA	2.77337	0.993885	6
Q99KV1	-0.379884	0.0998614	1.94733	0.93022	4
Q99L04	-0.326929	0.134083	2.3365	0.913888	5
Q99L13	-0.213944	0.0746225	4.16487	0.953789	8
Q99L43	-0.516375	0.0635716	1.35258	0.911945	2
Q99L45	-0.529707	0.0635751	1.31804	0.984923	2
Q99L88	-0.591445	NA	1.17195	0.863137	2
Q99LB2	-0.220031	0.0868104	3.86025	0.972053	8
Q99LB6	-0.143054	NA	4.84536	0.926932	9
Q99LC2	-0.469729	0.0512982	1.48769	0.986383	3
Q99LC3	-0.238266	0.0737176	3.20973	0.955597	7
Q99LC5	-0.253855	0.11026	3.6521	0.949964	8
Q99LD8	-0.27717	0.0955832	2.65891	0.955091	6
Q99LE6	-0.271836	0.126348	3.16555	0.954453	7
Q99LF4	-0.427179	0.0933818	1.68217	0.966481	3
Q99LG2	-0.0634413	NA	10.9258	0.863438	10
Q99LI7	-0.45258	0.0248695	1.53553	0.978434	3
Q99LP6	-0.236524	0.0573279	3.09964	0.966292	7
Q99LR1	-0.369018	0.215907	2.4553	0.955878	6
Q99LT0	-0.707779	NA	0.979327	0.852034	1
Q99LY9	-0.257063	NA	2.69641	0.928767	6
Q99M28	-0.495887	0.0507416	1.40867	0.972469	3
Q99M87	-0.434413	0.14959	1.69616	0.959954	3
Q99MN9	-0.192024	0.0702896	4.27994	0.908763	8
Q99MR6	-0.403893	0.0839544	1.77424	0.988074	4
Q99MR8	-0.284082	0.18388	3.08653	0.977379	7
Q99MZ7	-0.278944	NA	2.4849	0.986415	6
Q99N57	-0.149296	NA	4.64277	0.979086	9
Q99N85	-0.178518	0.082109	4.34206	0.999755	8
Q99N87	-0.228397	0.0313915	3.06377	0.906205	7
Q99N92	-0.0739158	NA	9.37753	0.917807	10
Q99N96	-0.067882	0.00402996	10.2291	0.951011	10
Q99NB8	-0.569333	NA	1.21747	0.97799	2
Q99NB9	-0.823224	0.315367	0.947121	0.937749	1
Q99PL5	-0.699128	0.22849	1.08275	0.965768	2
Q99PT1	-0.502461	0.51255	2.45656	0.937895	6
Q99PV0	-0.669393	0.110932	1.06361	0.969449	1
Q9CPP6	-0.167469	0.0258315	4.22634	0.952197	8
Q9CPQ1	-0.193373	0.0226705	3.62027	0.950154	8
Q9CPQ3	-0.307127	0.0452807	2.29723	0.975253	5
Q9CPR5	-0.153183	0.123682	6.30727	0.932211	10
Q9CPT4	-0.78127	0.50571	1.12233	0.898658	2
Q9CPV4	-0.272201	0.0348417	2.56749	0.959512	6
Q9CPY7	-0.206801	0.0434957	3.47305	0.976819	7
Q9CQ06	-0.145727	0.0892885	6.13986	0.944896	10
Q9CQ19	-0.566948	0.242269	1.34543	0.998829	2
Q9CQ22	-0.412702	0.129676	1.8395	0.956895	4
Q9CQ28	-0.0714691	0.0114573	9.8248	0.975069	10
Q9CQ40	-0.182509	0.134591	5.10424	0.910834	9
Q9CQ45	-0.576375	NA	1.2026	0.987911	2
Q9CQ54	-0.329088	NA	2.10626	0.947323	5
Q9CQ60	-0.136352	0.0442696	5.36633	0.881718	9
Q9CQ62	-0.252189	0.000396573	2.74852	0.997328	6
Q9CQ65	-0.0550161	0.0144277	13.0477	0.947345	10
Q9CQ69	-0.123565	0.00694521	5.61844	0.939559	9
Q9CQ71	-0.413098	NA	1.67792	0.999999	3
Q9CQ75	-0.236694	0.0748897	3.10467	0.962813	7
Q9CQ92	-0.335216	0.0739447	2.11933	0.993639	5
Q9CQB5	-0.416713	NA	1.66337	0.985201	3
Q9CQC7	-0.360932	0.11538	2.03917	0.943801	5
Q9CQD1	-0.454342	0.172609	1.69013	0.969457	3
Q9CQE1	-0.207086	0.0135118	3.3587	0.977086	7
Q9CQE3	-0.0673986	NA	10.2843	0.994553	10
Q9CQE7	-0.135601	NA	5.11166	0.981805	9
Q9CQE8	-0.388638	0.0502307	1.80635	0.957353	4
Q9CQF0	-0.23741	0.0396709	2.97555	0.96963	7
Q9CQF3	-0.384594	0.0484618	1.82083	0.979042	4
Q9CQF4	-0.556805	0.374888	1.60972	0.9374	3
Q9CQH3	-0.237288	0.0112387	2.92441	0.953228	7
Q9CQJ8	-0.198012	0.0744182	3.76654	0.883312	8
Q9CQL5	-0.0917774	NA	7.55248	0.980929	10
Q9CQN7	-0.178794	0.0543289	4.09124	0.993374	8
Q9CQQ7	-0.125166	0.030761	5.77043	0.957276	9
Q9CQR2	-0.322139	NA	2.1517	0.989698	5
Q9CQR4	-0.259991	NA	2.66605	0.99121	6
Q9CQS4	-0.491015	0.132249	1.46479	0.926752	3
Q9CQU0	-0.469703	0.0143032	1.4764	0.963749	3
Q9CQU1	-0.785251	NA	0.882708	0.811827	1
Q9CQV7	-0.332624	NA	2.08388	0.996676	5
Q9CQV8	-0.195929	0.115948	5.40279	0.974007	9
Q9CQW2	-0.368649	0.268829	2.56123	0.957298	6
Q9CQW9	-0.384857	0.25188	2.29191	0.955817	5
Q9CQX2	-0.123582	0.0153416	5.66917	0.98255	9
Q9CQX8	-0.242844	0.0261334	2.87519	0.928889	6
Q9CQZ5	-0.353055	0.199031	2.33355	0.969713	5
Q9CQZ6	-0.212151	0.0689734	3.44954	0.875635	7
Q9CR20	-0.145928	0.015674	4.7775	0.988833	9
Q9CR57	-0.310461	0.0437349	2.26481	0.995339	5
Q9CR59	-0.0973271	NA	7.12183	0.884368	10
Q9CR60	-0.0984122	NA	7.04331	0.939045	10
Q9CR61	-0.150362	NA	4.60986	0.997541	9
Q9CR62	-0.160993	0.032573	4.46804	0.975176	8
Q9CR67	-0.632925	NA	1.09515	0.988966	2
Q9CR68	-0.190729	0.0474673	3.84517	0.972614	8
Q9CR88	-0.216859	NA	3.19631	0.973259	7
Q9CR89	-0.26892	0.260938	4.87025	0.921852	9
Q9CRA4	-0.124368	NA	5.57335	0.992594	9
Q9CRA5	-0.665143	0.0138392	1.04233	0.974849	1
Q9CRB2	-0.259149	0.0149	2.67914	0.987602	6
Q9CRC8	-0.094161	NA	7.3613	0.896459	10
Q9CRD0	-0.559859	0.140498	1.30165	0.893051	2
Q9CRD2	-0.336872	0.110017	2.30945	0.915155	5
Q9CRY7	-0.37045	0.0103703	1.87183	0.994201	4
Q9CS42	-0.0801424	NA	8.64894	0.853921	10
Q9CSN1	-0.855254	0.144716	0.827119	0.90488	1
Q9CSU0	-1.0528	NA	0.658385	0.895521	1
Q9CU62	-0.818009	0.142702	0.867716	0.962848	1
Q9CW03	-0.679381	0.201059	1.10336	0.968853	2
Q9CWD8	-0.217587	NA	3.1856	0.844596	7
Q9CWE0	-0.639868	0.314	1.2424	0.931788	2
Q9CWF2	-0.11332	0.0323325	6.70634	0.888473	10
Q9CWG8	-0.492686	0.574347	4.38939	0.955601	8
Q9CWJ9	-0.0638473	0.0330633	12.5374	0.912292	10
Q9CWL8	-0.563238	0.00859005	1.23079	0.966824	2
Q9CWU6	-0.366971	0.0155786	1.89108	0.989235	4
Q9CWX2	-0.224809	NA	3.08328	0.982756	7
Q9CWZ3	-0.710994	NA	0.974899	0.997404	1
Q9CX13	-0.136373	NA	5.08274	0.830635	9
Q9CX86	-0.554645	0.182207	1.35528	0.948415	2
Q9CXD9	-0.135361	NA	5.12073	0.998472	9
Q9CXJ1	-0.289392	0.258796	4.89327	0.978638	9
Q9CXJ4	-0.0959588	0.0118023	7.27844	0.884959	10
Q9CXR1	-0.496155	NA	1.39704	0.99998	3
Q9CXS4	-0.155686	0.0251538	4.5111	0.923591	9
Q9CXT8	-0.486441	0.268681	2.81298	0.994803	6
Q9CXV1	-0.238324	0.102814	3.20683	0.924846	7
Q9CXW2	-0.144588	0.0937027	6.69266	0.948694	10
Q9CXY6	-0.276172	0.0634286	2.63303	0.948839	6
Q9CY16	-0.075348	NA	9.19927	0.99729	10
Q9CY27	-0.395627	0.134255	1.97235	0.971855	4
Q9CY28	-0.599992	0.29613	1.31549	0.978568	2
Q9CY50	-0.364386	0.231606	3.1546	0.955551	7
Q9CY58	-0.607479	NA	1.14102	0.986508	2
Q9CY64	-0.109689	NA	6.31921	0.884858	10
Q9CYA0	-0.416077	0.00025565	1.66591	0.959779	3
Q9CYA6	-1.26293	0.644438	0.630989	0.922543	1
Q9CYL5	-0.285576	0.0644557	2.50318	0.934987	6
Q9CYN2	-0.242012	0.115381	3.35074	0.969074	7
Q9CYN9	-0.34198	NA	2.02686	0.982359	4
Q9CYR0	-0.149794	0.00116963	4.62747	0.879562	9
Q9CZ13	-0.14028	0.0306952	5.16022	0.919757	9
Q9CZ83	-0.126038	NA	5.49952	0.976119	9
Q9CZB0	-0.156587	NA	4.42658	0.999223	8
Q9CZD3	-0.150473	0.114952	7.11956	0.928625	10
Q9CZD5	-0.912792	0.151254	0.769941	0.988625	1
Q9CZH3	-0.0655609	NA	10.5726	0.807286	10
Q9CZH7	-0.502618	0.0853179	1.40423	0.989227	3
Q9CZL5	-0.182248	0.0994508	5.21789	0.969877	9
Q9CZN8	-0.249637	0.20224	5.14925	0.932866	9
Q9CZP5	-0.170751	0.10395	4.98276	0.915894	9
Q9CZR8	-0.309267	0.0159556	2.24534	0.959227	5
Q9CZT5	-0.704263	NA	0.984216	0.994538	1
Q9CZU3	-0.845219	0.265334	0.862582	0.997408	1
Q9CZU6	-0.22651	0.02046	3.08535	0.979931	7
Q9CZW4	-0.723876	0.300424	1.11665	0.900125	2
Q9CZX7	-0.254419	0.201029	3.96091	0.919204	8
Q9CZX9	-0.800235	NA	0.866179	0.994502	1
Q9D023	-0.303679	0.0694771	2.34384	0.891654	5
Q9D024	-0.50805	0.125619	1.54353	0.940741	3
Q9D051	-0.19744	0.0612349	3.92268	0.960828	8
Q9D071	-0.0760343	0.0370857	10.347	0.867602	10
Q9D0B0	-0.680291	NA	1.0189	0.996821	1
Q9D0B5	-0.422426	NA	1.64087	0.97938	3
Q9D0B6	-0.0599455	NA	11.563	0.99618	10
Q9D0D3	-0.329912	0.0231134	2.10764	0.943537	5
Q9D0E1	-0.301012	0.081381	2.50699	0.970916	6
Q9D0F3	-0.334081	0.129624	2.66534	0.99526	6
Q9D0G0	-0.222952	0.0601323	3.27695	0.898298	7
Q9D0I9	-0.406786	0.0461311	1.72068	0.954257	3
Q9D0J4	-0.207038	0.189814	5.31752	0.95531	9
Q9D0K2	-0.263869	0.0291001	2.64709	0.977741	6
Q9D0L4	-0.275576	0.0609139	2.59932	0.939997	6
Q9D0L7	-0.286431	0.0146197	2.4231	0.97781	6
Q9D0M3	-0.143774	0.0330569	5.02019	0.96038	9
Q9D0Q7	-0.0975809	0.0129787	7.18836	0.952004	10
Q9D0R2	-0.0643838	0.0566082	17.5489	0.992036	10
Q9D0S9	-0.3407	NA	2.03448	0.986666	4
Q9D0T1	-0.282291	0.00496251	2.45594	0.982169	6
Q9D125	-0.130218	NA	5.32297	0.950699	9
Q9D172	-0.280148	0.0455604	2.52281	0.950244	6
Q9D1B9	-0.170605	0.0705788	4.67921	0.978256	9
Q9D1D4	-0.149743	0.0920295	5.65015	0.987012	9
Q9D1H8	-0.27094	NA	2.55831	0.914839	6
Q9D1I2	-0.160721	NA	4.31273	0.9872	8
Q9D1I5	-0.312712	NA	2.21657	0.906997	5
Q9D1I6	-0.301511	NA	2.29891	0.92095	5
Q9D1M4	-0.31925	NA	2.17117	0.972409	5
Q9D1M7	-0.114888	0.0272114	6.27036	0.89885	10
Q9D1N9	-0.0691473	NA	10.0242	0.923569	10
Q9D1P0	-0.0709136	0.00223169	9.77937	0.958428	10
Q9D1Q6	-0.279873	0.132566	3.24927	0.983751	7
Q9D1R9	-0.37155	NA	1.86555	0.994269	4
Q9D273	-0.230775	NA	3.00356	0.962538	7
Q9D2E2	-0.126127	NA	5.49564	0.93694	9
Q9D2G2	-0.157676	0.0589273	4.96792	0.938653	9
Q9D2R0	-0.138772	NA	4.99485	0.903535	9
Q9D2R6	-0.329129	0.0144836	2.10805	0.98687	5
Q9D2R8	-0.211999	0.0609603	3.41057	0.963506	7
Q9D2U9	-0.159007	0.000860211	4.35929	0.902143	8
Q9D379	-0.315325	0.11525	2.52826	0.94453	6
Q9D3D9	-0.220441	0.0473291	3.29751	0.984932	7
Q9D3E6	-0.573833	0.0392477	1.21076	0.936481	2
Q9D3P8	-0.101652	0.0265153	7.05896	0.995348	10
Q9D404	-0.25173	NA	2.75354	0.983597	6
Q9D517	-0.285097	0.104894	2.79966	0.988398	6
Q9D554	-0.521455	0.203062	1.45358	0.961515	3
Q9D5T0	-0.432315	0.14803	1.75941	0.966172	4
Q9D666	-0.279515	0.129442	2.76379	0.979629	6
Q9D6F9	-0.112717	0.032682	6.83833	0.896017	10
Q9D6J5	-0.182413	0.0492162	4.01644	0.932502	8
Q9D6J6	-0.254396	0.0980143	3.08199	0.944062	7
Q9D6K5	-0.349292	0.0802419	2.06813	0.955782	5
Q9D6K8	-0.554301	0.19285	1.43095	0.942825	3
Q9D6R2	-0.226618	0.0073428	3.06079	0.994915	7
Q9D6S7	-0.250568	0.0130634	2.772	0.971918	6
Q9D6U8	-0.198108	0.136616	7.26011	0.930224	10
Q9D6X6	-0.332601	0.0986911	2.21155	0.951568	5
Q9D6Z0	-0.415274	NA	1.66913	0.951039	3
Q9D6Z1	-0.274277	0.0858843	2.84883	0.945087	6
Q9D710	-0.221129	NA	3.13458	0.850778	7
Q9D7A8	-0.408953	NA	1.69493	0.924942	3
Q9D7B6	-0.235438	0.0828959	4.09791	0.972267	8
Q9D7B7	-1.89033	NA	0.36668	0.801939	1
Q9D7M1	-0.253368	NA	2.73574	0.98562	6
Q9D7N3	-0.155999	0.13205	6.92384	0.938646	10
Q9D7N9	-0.239177	0.12363	3.75963	0.950767	8
Q9D7S7	-0.260537	0.0304007	2.67869	0.955914	6
Q9D832	-0.713499	0.228466	1.03645	0.882016	1
Q9D855	-0.145859	0.0383102	5.04049	0.954887	9
Q9D880	-0.237191	0.0175496	2.93267	0.952172	7
Q9D898	-0.365183	0.0157843	1.89986	0.997196	4
Q9D8B3	-0.133782	NA	5.18116	0.998216	9
Q9D8E6	-0.309518	0.0219376	2.24984	0.979403	5
Q9D8N0	-0.102605	0.0881638	12.8574	0.973413	10
Q9D8S9	-0.65326	0.286325	1.17381	0.992178	2
Q9D8T7	-0.540378	NA	1.28271	0.909504	2
Q9D8V0	-0.131847	0.0203471	5.34807	0.941044	9
Q9D8W5	-0.116207	NA	5.96478	0.958458	9
Q9D8Y1	-0.211252	NA	3.28113	0.996707	7
Q9D964	-0.193745	0.187272	12.2765	0.898318	10
Q9D9V3	-0.230595	0.0760517	3.17878	0.99947	7
Q9DAS9	-0.407128	NA	1.70253	0.996708	3
Q9DAT5	-0.26745	NA	2.59168	0.999588	6
Q9DAV9	-0.630373	NA	1.09958	0.925164	2
Q9DAW9	-0.157588	0.00461992	4.40037	0.871273	8
Q9DB05	-0.598343	0.179905	1.28442	0.926029	2
Q9DB15	-0.149364	0.0233715	4.75071	0.977669	9
Q9DB20	-0.17542	0.0498769	4.27373	0.921949	8
Q9DB25	-0.309039	NA	2.24291	0.896464	5
Q9DB27	-0.153881	NA	4.50443	0.902723	9
Q9DB70	-0.732758	NA	0.945943	0.988739	1
Q9DB73	-0.244556	0.0374469	2.89088	0.976769	6
Q9DB77	-0.156376	0.0232789	4.53223	0.944453	9
Q9DBD5	-0.192669	0.0730054	3.87584	0.929659	8
Q9DBE8	-0.463238	NA	1.49631	0.954107	3
Q9DBG5	-0.337786	NA	2.05203	0.989974	5
Q9DBG7	-0.697148	0.264178	1.08915	0.936508	2
Q9DBH5	-0.259835	0.154583	3.64901	0.920491	8
Q9DBJ3	-0.941324	0.18125	0.756733	0.943494	1
Q9DBL1	-0.317013	0.136793	2.80676	0.990501	6
Q9DBL7	-0.125032	NA	5.54377	0.95922	9
Q9DBN5	-0.564446	0.364483	1.55148	0.906249	3
Q9DBR7	-0.416832	0.124137	1.79079	0.983574	4
Q9DBS1	-0.286138	0.1645	3.32503	0.914908	7
Q9DBY8	-0.433101	0.130522	1.69446	0.935822	3
Q9DC23	-0.755492	NA	0.917478	0.995069	1
Q9DC29	-0.779869	NA	0.888799	0.876929	1
Q9DC50	-0.852546	0.125656	0.825966	0.981183	1
Q9DC51	-0.721657	NA	0.960494	0.99939	1
Q9DC61	-0.201953	0.0898468	4.43198	0.954582	8
Q9DC69	-0.241334	0.0802821	3.16158	0.929751	7
Q9DC70	-0.307479	0.10416	2.46674	0.963781	6
Q9DC71	-0.158309	0.0983451	5.4253	0.988461	9
Q9DCA2	-0.0925322	0.00172409	7.49217	0.807598	10
Q9DCF9	-0.619616	NA	1.11867	0.970094	2
Q9DCI9	-0.234422	NA	2.95683	0.974444	7
Q9DCJ5	-0.178931	0.00411682	3.87484	0.932037	8
Q9DCM0	-0.223288	NA	3.10428	0.987794	7
Q9DCN2	-0.344712	0.0686628	2.09661	0.973555	5
Q9DCS3	-0.221908	0.0158138	3.13552	0.968572	7
Q9DCS9	-0.201656	0.0459907	3.55446	0.904745	8
Q9DCT2	-0.275971	0.0890439	2.70768	0.940075	6
Q9DCT5	-0.556692	0.0509932	1.25182	0.963656	2
Q9DCT8	-0.340941	NA	2.03304	0.999908	4
Q9DCU6	-0.612984	0.687503	2.30405	0.879013	5
Q9DCV4	-0.282391	0.0182445	2.46233	0.998133	6
Q9DCW4	-0.229053	0.00296739	3.02652	0.959986	7
Q9DCX2	-0.155437	0.0548877	4.96528	0.975681	9
Q9EP69	-0.361318	0.0185626	1.9225	0.981366	4
Q9EP71	-0.414609	0.101429	1.76831	0.988814	4
Q9EP72	-0.587181	0.248872	1.29696	0.929048	2
Q9EPE9	-0.356657	0.19478	2.64836	0.968002	6
Q9EPL8	-0.142076	0.00990473	4.89058	0.965412	9
Q9EPL9	-0.465837	0.0967262	1.53373	0.990619	3
Q9EPR5	-0.26986	0.0896374	2.89933	0.951138	6
Q9EPU0	-0.555928	0.344927	2.07108	0.940974	5
Q9EPU4	-0.427524	0.0454045	1.63464	0.986259	3
Q9EQ20	-0.318258	0.0851478	2.3146	0.953035	5
Q9EQ61	-0.440777	0.266798	1.92524	0.933605	4
Q9EQ80	-0.198293	NA	3.49557	0.9781	8
Q9EQH2	-0.334995	0.048055	2.09746	0.991479	5
Q9EQI8	-0.161248	0.0935392	5.16823	0.958354	9
Q9EQJ0	-0.316799	0.0852146	2.2701	0.975245	5
Q9EQQ2	-0.100928	NA	6.86771	0.951199	10
Q9ER00	-0.52318	0.0335497	1.32934	0.963871	2
Q9ER38	-0.31052	0.210134	2.89511	0.985731	6
Q9ER41	-0.277844	0.195305	3.3133	0.985471	7
Q9ER64	-0.76331	NA	0.908081	0.936317	1
Q9ER69	-0.799004	NA	0.867515	0.918231	1
Q9ER88	-0.225536	0.0908845	3.88338	0.967377	8
Q9ERA0	-0.752419	NA	0.921226	0.971334	1
Q9ERD7	-0.105147	0.0330662	7.47624	0.894782	10
Q9ERE7	-0.394455	0.0881765	1.82458	0.976167	4
Q9ERG2	-0.670133	NA	1.03434	0.998975	1
Q9ERI6	-0.346283	0.0400858	2.02392	0.974718	4
Q9ERK4	-0.0953446	0.0532051	8.61056	0.86413	10
Q9ERN0	-0.356093	NA	1.94653	0.932777	4
Q9ERR7	-0.329649	0.0233771	2.10798	0.994124	5
Q9ERS2	-0.250746	0.0322473	2.80236	0.944085	6
Q9ERS5	-0.117245	NA	5.91193	0.996541	9
Q9ERU9	-0.569597	0.157387	1.29085	0.967012	2
Q9ES83	-0.849207	0.196449	0.838669	0.984453	1
Q9ES97	-0.327313	NA	2.11769	0.893461	5
Q9ESW4	-0.16673	0.0258591	4.22024	0.946018	8
Q9ET30	-0.425415	0.142749	1.73893	0.912615	4
Q9ET77	-0.336862	NA	2.05766	0.995745	5
Q9ET78	-0.41704	0.074324	1.70307	0.981448	3
Q9JHI5	-0.195981	0.0840116	4.59289	0.949633	9
Q9JHI7	-0.525305	NA	1.31951	0.959399	2
Q9JHJ0	-0.434389	NA	1.59568	0.817997	3
Q9JHP7	-0.287094	0.360396	11.3841	0.975211	10
Q9JHS4	-0.517909	0.231734	1.98105	0.978709	4
Q9JHS9	-0.758963	NA	0.913282	0.98682	1
Q9JHU4	-0.18845	0.152508	6.44165	0.920001	10
Q9JHW2	-0.255548	NA	2.7124	0.939119	6
Q9JI39	-0.214195	0.148667	4.23356	0.936053	8
Q9JI91	-0.450921	0.100909	1.60298	0.96631	3
Q9JIF7	-0.145182	0.152646	9.44626	0.92827	10
Q9JIG8	-0.626499	NA	1.10638	0.939527	2
Q9JIH2	-0.791977	NA	0.875211	0.992951	1
Q9JIK5	-0.954948	0.628691	2.69777	0.954721	6
Q9JIK9	-0.153352	0.139362	7.69923	0.977442	10
Q9JIQ3	-0.299701	NA	2.3128	0.87899	5
Q9JIW9	-0.537195	0.144954	1.3731	0.969398	2
Q9JIX8	-0.571359	NA	1.21316	0.978757	2
Q9JJ28	-0.435926	0.327863	2.67385	0.969387	6
Q9JJA4	-0.32521	NA	2.13138	0.97319	5
Q9JJE7	-0.578856	NA	1.19744	0.843648	2
Q9JJI8	-0.239239	0.0596806	3.02817	0.988919	7
Q9JJL8	-0.393573	NA	1.76117	0.967251	4
Q9JJZ2	-0.161676	0.0932401	6.5799	0.877353	10
Q9JK92	-0.641431	NA	1.08063	0.997555	2
Q9JKB3	-0.682656	0.307746	1.16217	0.948141	2
Q9JKF7	-0.106567	0.0457809	7.16555	0.885085	10
Q9JKR6	-0.395495	0.10719	2.3387	0.973643	5
Q9JKS4	-0.39678	NA	1.74693	0.989374	4
Q9JKV1	-0.122523	NA	5.65726	0.975747	9
Q9JL56	-0.244381	NA	2.83633	0.907958	6
Q9JLR1	-0.248622	0.152485	3.61898	0.984868	8
Q9JLZ3	-0.231899	0.0254183	3.01178	0.988426	7
Q9JM76	-0.260601	0.0676661	2.79333	0.970919	6
Q9QUI0	-0.513606	0.281563	1.89488	0.952059	4
Q9QUJ7	-0.885183	0.258926	0.846982	0.948493	1
Q9QUM9	-0.19204	NA	3.60939	0.965567	8
Q9QWR8	-0.15304	0.0127838	4.54505	0.924367	9
Q9QX47	-0.350763	0.00218878	1.97615	0.998985	4
Q9QX60	-0.228944	0.0250407	3.05622	0.984826	7
Q9QXB9	-0.0882364	0.018527	8.03264	0.839088	10
Q9QXK3	-0.0598613	0.00923381	11.7186	0.842274	10
Q9QXS1	-0.45525	0.0912297	1.5694	0.972027	3
Q9QXS6	-0.336078	NA	2.06246	0.962151	5
Q9QXT0	-0.34681	0.0524418	2.03467	0.970359	5
Q9QXY6	-0.216192	NA	3.20616	0.931242	7
Q9QY76	-0.392118	0.0450055	1.78558	0.987477	4
Q9QYA2	-0.126434	0.0475383	6.12947	0.93094	10
Q9QYB1	-0.163364	NA	4.24297	0.957195	8
Q9QYE6	-0.474397	0.069027	1.48739	0.98524	3
Q9QYJ0	-0.558728	0.097801	1.27219	0.987271	2
Q9QYR6	-0.691684	0.0396399	1.00376	0.999642	1
Q9QYR9	-0.19655	0.0451753	3.84824	0.959264	8
Q9QYS9	-0.923734	NA	0.750376	0.970873	1
Q9QZ23	-0.485862	0.0647949	1.44363	0.992934	3
Q9QZA0	-0.584138	NA	1.18662	0.967466	2
Q9QZD8	-0.157979	0.083409	5.09815	0.90153	9
Q9QZD9	-0.506422	NA	1.36872	0.975693	2
Q9QZE5	-0.056814	0.0341022	29.5059	0.903719	10
Q9QZF2	-0.665845	0.0930276	1.05869	0.865336	1
Q9QZH6	-0.163866	0.0359788	4.33443	0.99704	8
Q9QZQ8	-0.187	0.0327474	3.82092	0.957979	8
Q9R045	-0.225872	0.0183505	3.07892	0.981477	7
Q9R099	-0.441811	NA	1.56888	0.996411	3
Q9R0A0	-0.420304	0.0710923	1.68477	0.966605	3
Q9R0B9	-0.376477	0.277711	4.51834	0.944748	9
Q9R0E1	-0.557646	0.271234	1.75762	0.912279	4
Q9R0E2	-0.910211	0.4278	0.863824	0.946722	1
Q9R0H0	-0.879824	0.276244	0.846965	0.937291	1
Q9R0N0	-0.057187	NA	12.1207	0.910915	10
Q9R0P5	-0.0833417	NA	8.31693	0.830736	10
Q9R0X4	-0.175836	0.0483569	4.57917	0.950838	9
Q9R0Y5	-0.139659	0.0515385	5.36604	0.882226	9
Q9R112	-0.255333	0.0719656	2.88837	0.910611	6
Q9R118	-0.440231	0.0411191	1.58628	0.992882	3
Q9R190	-0.424988	0.198537	1.83075	0.976432	4
Q9R1C7	-0.550632	0.098412	1.28511	0.969355	2
Q9R1P3	-0.179001	NA	3.8723	0.987528	8
Q9R1S3	-0.253891	0.214311	4.241	0.956643	8
Q9R1T2	-0.0339912	NA	20.3919	0.969663	10
Q9R1T4	-0.144024	NA	4.81273	0.997623	9
Q9R1Z8	-0.491607	0.0112761	1.41033	0.898457	3
Q9R205	-0.555805	0.0931164	1.26486	0.978761	2
Q9WTI7	-0.310584	0.103116	2.47494	0.964377	6
Q9WTL7	-0.22619	0.103114	3.41981	0.957256	7
Q9WTP6	-0.250725	0.0636636	2.90021	0.975031	6
Q9WTP7	-0.224964	0.0999923	15.0982	0.962119	10
Q9WTQ8	-0.115129	NA	6.02064	0.938717	9
Q9WTX2	-0.134127	NA	5.16785	0.988195	9
Q9WTX5	-0.7197	NA	0.963106	0.940289	1
Q9WUA3	-0.109521	0.0261961	6.51528	0.928715	10
Q9WUH1	-0.488028	NA	1.4203	0.991702	3
Q9WUM3	-0.511128	NA	1.35611	0.998711	2
Q9WUM5	-0.236776	0.0598321	3.07956	0.982197	7
Q9WUP7	-0.0808166	0.0269196	9.08055	0.931342	10
Q9WUR2	-0.210456	0.115723	6.61418	0.975542	10
Q9WUR9	-0.209859	NA	3.30293	0.818776	7
Q9WV02	-0.29696	0.0507135	2.39002	0.968877	5
Q9WV27	-0.482161	0.177593	1.55345	0.929362	3
Q9WV55	-0.408478	0.0556288	1.72446	0.991948	4
Q9WV91	-0.40064	NA	1.7301	0.999827	4
Q9WV92	-0.421557	NA	1.64425	0.953293	3
Q9WV98	-0.199269	NA	3.47845	0.877648	7
Q9WVA3	-0.562711	0.0840006	1.24973	0.970799	2
Q9WVA4	-0.143392	0.0404098	5.08619	0.912611	9
Q9WVE8	-0.492629	0.153957	1.56596	0.952857	3
Q9WVJ2	-0.209272	NA	3.31218	0.812171	7
Q9WVL0	-0.221793	0.0536341	3.21933	0.969057	7
Q9WVL3	-0.533521	0.0201413	1.30012	0.969659	2
Q9WVR4	-0.935391	NA	0.741024	0.997207	1
Q9Z0H4	-0.76142	0.0396466	0.911943	0.989077	1
Q9Z0M6	-0.427714	0.139439	1.8168	0.944991	4
Q9Z0N2	-0.462574	0.0311784	1.50286	0.988721	3
Q9Z0S9	-0.88485	NA	0.783349	0.989915	1
Q9Z0W3	-0.0400696	0.0102948	18.3849	0.944516	10
Q9Z0X1	-0.209115	0.0243938	3.35311	0.968516	7
Q9Z110	-0.251027	0.124448	5.60521	0.97222	9
Q9Z1E4	-0.0762221	NA	9.09378	0.903271	10
Q9Z1F9	-0.0542333	NA	12.7808	0.98992	10
Q9Z1J3	-0.158661	0.16636	8.68079	0.931131	10
Q9Z1M8	-0.850258	NA	0.81522	0.94183	1
Q9Z1N5	-0.44431	0.334036	2.29711	0.967965	5
Q9Z1P6	-0.386294	NA	1.79435	0.87141	4
Q9Z1Q2	-0.380081	NA	1.82368	0.999717	4
Q9Z1T1	-0.102349	0.00584553	6.78346	0.895971	10
Q9Z1W8	-0.533087	0.217985	1.41888	0.925458	3
Q9Z1Z0	-0.155907	NA	4.44591	0.892879	8
Q9Z1Z2	-0.799296	NA	0.867197	0.999235	1
Q9Z204	-0.402696	0.110986	1.828	0.987522	4
Q9Z247	-0.57594	NA	1.20351	0.955146	2
Q9Z277	-1.22792	1.3829	1.54305	0.981289	3
Q9Z2A7	-0.303831	NA	2.28135	0.907936	5
Q9Z2B9	-0.117912	NA	5.87851	0.986949	9
Q9Z2D6	-0.257372	0.0970322	2.89921	0.948046	6
Q9Z2E1	-1.16449	NA	0.595237	0.899949	1
Q9Z2I0	-0.252407	0.111098	3.19225	0.951347	7
Q9Z2I8	-0.25059	0.0210159	2.77973	0.999259	6
Q9Z2I9	-0.253623	0.0301219	2.76871	0.975389	6
Q9Z2L6	-0.674028	NA	1.02837	0.956928	1
Q9Z2X1	-0.280198	NA	2.47377	0.999169	6
Q9Z2Z6	-0.18583	0.0776487	4.11778	0.965947	8
Q9Z315	-0.99698	0.378645	0.76686	0.933611	1
Q9Z329	-0.605053	0.050703	1.14963	0.915783	2
