# Supplementary material for: Selective clearance of the inner nuclear membrane protein emerin by vesicular transport during ER stress
Source: eLife journal article supplement (doi:10.7554/elife.49796), 2019-10-10
Supplement: supp [file elife-49796-supp-v1.zip › elife_poa_e49796_Supplementary_file_2.xlsx]

## Sheet: proteins reviewed only
UniprotID	Description	mean %Heavy	stdev	N	time (days)		median %H	SD	n	0D
A2AGL3	Ryanodine receptor 3 OS=Mus musculus GN=Ryr3 PE=1 SV=1	99.9061	NA	1	0		97.1232	8.35246	1542
A2AMM0	Muscle-related coiled-coil protein OS=Mus musculus GN=Murc PE=2 SV=1	95.5669	5.17574	5	0		median %H	SD	n	1D
A2AN08	E3 ubiquitin-protein ligase UBR4 OS=Mus musculus GN=Ubr4 PE=1 SV=1	97.8611	2.01148	13	0		75.0549	15.878	1646
A2APY7	NADH dehydrogenase [ubiquinone] 1 alpha subcomplex assembly factor 5 OS=Mus musculus GN=Ndufaf5 PE=2 SV=1	99.7884	NA	1	0		median %H	SD	n	2D
A2AQ07	Tubulin beta-1 chain OS=Mus musculus GN=Tubb1 PE=1 SV=1	98.2394	1.32316	3	0		54.0663	20.1759	1625
A2AQP0	Myosin-7B OS=Mus musculus GN=Myh7b PE=3 SV=1	98.041	1.21699	4	0		median %H	SD	n	3D
A2ASS6	Titin OS=Mus musculus GN=Ttn PE=1 SV=1	94.5898	17.1394	308	0		41.3867	18.7754	1656
A2AUC9	Kelch-like protein 41 OS=Mus musculus GN=Klhl41 PE=1 SV=1	97.5739	0.113773	2	0
A2BE28	Ribosomal biogenesis protein LAS1L OS=Mus musculus GN=Las1l PE=1 SV=1	96.0517	4.11568	6	0
A6H611	Mitochondrial intermediate peptidase OS=Mus musculus GN=Mipep PE=2 SV=1	98.1786	1.55482	3	0
B0V2N1	Receptor-type tyrosine-protein phosphatase S OS=Mus musculus GN=Ptprs PE=1 SV=1	89.2499	12.1965	2	0
B1AZI6	THO complex subunit 2 OS=Mus musculus GN=Thoc2 PE=1 SV=1	84.3014	29.9047	9	0
B2RQC6	CAD protein OS=Mus musculus GN=Cad PE=2 SV=1	96.6192	3.58163	16	0
B2RRE7	OTU domain-containing protein 4 OS=Mus musculus GN=Otud4 PE=1 SV=1	91.1785	NA	1	0
B2RXS4	Plexin-B2 OS=Mus musculus GN=Plxnb2 PE=1 SV=1	85.2297	29.8488	18	0
B2RY56	RNA-binding protein 25 OS=Mus musculus GN=Rbm25 PE=1 SV=2	88.1789	31.4168	9	0
B7ZMP1	Probable Xaa-Pro aminopeptidase 3 OS=Mus musculus GN=Xpnpep3 PE=2 SV=1	98.3113	0.513184	4	0
B9EJ80	PDZ domain containing 8 OS=Mus musculus GN=Pdzd8 PE=2 SV=1	93.8016	NA	1	0
D3YXK2	Scaffold attachment factor B1 OS=Mus musculus GN=Safb PE=1 SV=2	98.808	1.00365	3	0
D3YZG8	Probable bifunctional methylenetetrahydrofolate dehydrogenase/cyclohydrolase 2 OS=Mus musculus GN=Mthfd2l PE=3 SV=1	93.1159	NA	1	0
D3Z7P3	Glutaminase kidney isoform, mitochondrial OS=Mus musculus GN=Gls PE=1 SV=1	97.059	3.34447	20	0
E0CX20	Protein BUD31 homolog OS=Mus musculus GN=Bud31 PE=4 SV=1	98.1921	0.844	2	0
E0CYV9	Protein 1110002E22Rik OS=Mus musculus GN=1110002E22Rik PE=4 SV=1	96.8814	4.21689	4	0
E9PZJ8	Activating signal cointegrator 1 complex subunit 3 OS=Mus musculus GN=Ascc3 PE=1 SV=1	98.7128	0.303856	2	0
E9PZQ0	Ryanodine receptor 1 OS=Mus musculus GN=Ryr1 PE=1 SV=1	83.2097	32.7143	23	0
E9Q0K6	Deoxynucleoside triphosphate triphosphohydrolase SAMHD1 OS=Mus musculus GN=Samhd1 PE=1 SV=1	95.7169	1.00084	2	0
E9Q3E1	Aldehyde dehydrogenase OS=Mus musculus GN=Aldh3b2 PE=3 SV=1	94.3761	NA	1	0
E9Q3L2	Protein Pi4ka OS=Mus musculus GN=Pi4ka PE=4 SV=1	94.2205	NA	1	0
E9Q401	Ryanodine receptor 2 OS=Mus musculus GN=Ryr2 PE=1 SV=1	99.9061	NA	1	0
E9Q555	E3 ubiquitin-protein ligase RNF213 OS=Mus musculus GN=Rnf213 PE=2 SV=1	96.3796	3.25792	3	0
E9Q5G3	Kinesin-like protein KIF23 OS=Mus musculus GN=Kif23 PE=1 SV=1	95.4914	2.61606	3	0
F6ZDS4	Nucleoprotein TPR OS=Mus musculus GN=Tpr PE=1 SV=1	93.6711	17.3339	32	0
F8VPU2	FERM, RhoGEF and pleckstrin domain-containing protein 1 OS=Mus musculus GN=Farp1 PE=1 SV=1	88.5788	11.168	3	0
F8VQB6	Unconventional myosin-X OS=Mus musculus GN=Myo10 PE=1 SV=1	88.588	19.5924	6	0
G5E829	Plasma membrane calcium-transporting ATPase 1 OS=Mus musculus GN=Atp2b1 PE=1 SV=1	95.4569	9.9506	18	0
G5E870	E3 ubiquitin-protein ligase TRIP12 OS=Mus musculus GN=Trip12 PE=1 SV=1	86.7903	23.4779	10	0
J3QMK6	Aldehyde dehydrogenase OS=Mus musculus GN=1700055N04Rik PE=3 SV=1	94.3761	NA	1	0
O08528	Hexokinase-2 OS=Mus musculus GN=Hk2 PE=2 SV=1	97.613	2.41902	16	0
O08532	Voltage-dependent calcium channel subunit alpha-2/delta-1 OS=Mus musculus GN=Cacna2d1 PE=1 SV=1	97.4299	2.13904	12	0
O08539	Myc box-dependent-interacting protein 1 OS=Mus musculus GN=Bin1 PE=1 SV=1	96.1808	2.80447	3	0
O08547	Vesicle-trafficking protein SEC22b OS=Mus musculus GN=Sec22b PE=1 SV=3	96.8534	3.00874	8	0
O08553	Dihydropyrimidinase-related protein 2 OS=Mus musculus GN=Dpysl2 PE=1 SV=2	95.2475	2.23631	7	0
O08579	Emerin OS=Mus musculus GN=Emd PE=1 SV=1	93.9929	NA	1	0
O08583	THO complex subunit 4 OS=Mus musculus GN=Alyref PE=1 SV=3	99.1947	0.488883	10	0
O08601	Microsomal triglyceride transfer protein large subunit OS=Mus musculus GN=Mttp PE=2 SV=2	98.0085	NA	1	0
O08638	Myosin-11 OS=Mus musculus GN=Myh11 PE=1 SV=1	96.16	2.74444	8	0
O08709	Peroxiredoxin-6 OS=Mus musculus GN=Prdx6 PE=1 SV=3	0.815092	NA	1	0
O08749	Dihydrolipoyl dehydrogenase, mitochondrial OS=Mus musculus GN=Dld PE=1 SV=2	98.5331	1.26596	20	0
O08756	3-hydroxyacyl-CoA dehydrogenase type-2 OS=Mus musculus GN=Hsd17b10 PE=1 SV=4	97.5588	1.28769	12	0
O08795	Glucosidase 2 subunit beta OS=Mus musculus GN=Prkcsh PE=1 SV=1	98.351	1.57029	10	0
O08807	Peroxiredoxin-4 OS=Mus musculus GN=Prdx4 PE=1 SV=1	98.0927	0.946122	7	0
O08912	Polypeptide N-acetylgalactosaminyltransferase 1 OS=Mus musculus GN=Galnt1 PE=1 SV=1	85.6517	16.8505	5	0
O08917	Flotillin-1 OS=Mus musculus GN=Flot1 PE=1 SV=1	89.8523	19.8007	12	0
O09005	Sphingolipid delta(4)-desaturase DES1 OS=Mus musculus GN=Degs1 PE=2 SV=1	97.053	3.93356	3	0
O09061	Proteasome subunit beta type-1 OS=Mus musculus GN=Psmb1 PE=1 SV=1	97.8085	0.76856	6	0
O09106	Histone deacetylase 1 OS=Mus musculus GN=Hdac1 PE=1 SV=1	97.9402	1.28861	2	0
O09111	NADH dehydrogenase [ubiquinone] 1 beta subcomplex subunit 11, mitochondrial OS=Mus musculus GN=Ndufb11 PE=1 SV=2	99.0498	0.753767	6	0
O09131	Glutathione S-transferase omega-1 OS=Mus musculus GN=Gsto1 PE=2 SV=2	97.0728	2.29596	4	0
O09161	Calsequestrin-2 OS=Mus musculus GN=Casq2 PE=1 SV=3	97.8882	2.28223	4	0
O09165	Calsequestrin-1 OS=Mus musculus GN=Casq1 PE=1 SV=3	97.2184	3.99628	3	0
O09174	Alpha-methylacyl-CoA racemase OS=Mus musculus GN=Amacr PE=1 SV=4	98.6571	1.23601	12	0
O35074	Prostacyclin synthase OS=Mus musculus GN=Ptgis PE=2 SV=1	96.2712	6.175	14	0
O35114	Lysosome membrane protein 2 OS=Mus musculus GN=Scarb2 PE=1 SV=3	98.1117	0.65946	3	0
O35127	Protein C10 OS=Mus musculus GN=Grcc10 PE=2 SV=1	97.7258	0.667867	2	0
O35129	Prohibitin-2 OS=Mus musculus GN=Phb2 PE=1 SV=1	97.5018	2.10185	16	0
O35143	ATPase inhibitor, mitochondrial OS=Mus musculus GN=Atpif1 PE=1 SV=2	98.7125	0.643959	7	0
O35166	Golgi SNAP receptor complex member 2 OS=Mus musculus GN=Gosr2 PE=2 SV=2	97.7479	1.95552	2	0
O35218	Cleavage and polyadenylation specificity factor subunit 2 OS=Mus musculus GN=Cpsf2 PE=1 SV=1	96.3134	5.60484	4	0
O35226	26S proteasome non-ATPase regulatory subunit 4 OS=Mus musculus GN=Psmd4 PE=1 SV=1	99.0374	0.0624203	2	0
O35295	Transcriptional activator protein Pur-beta OS=Mus musculus GN=Purb PE=1 SV=3	97.8388	1.66928	8	0
O35316	Sodium- and chloride-dependent taurine transporter OS=Mus musculus GN=Slc6a6 PE=1 SV=2	95.3526	2.18596	2	0
O35326	Serine/arginine-rich splicing factor 5 OS=Mus musculus GN=Srsf5 PE=1 SV=2	97.7558	0.936711	4	0
O35405	Phospholipase D3 OS=Mus musculus GN=Pld3 PE=2 SV=1	97.601	NA	1	0
O35435	Dihydroorotate dehydrogenase (quinone), mitochondrial OS=Mus musculus GN=Dhodh PE=2 SV=2	95.605	2.77978	4	0
O35459	Delta(3,5)-Delta(2,4)-dienoyl-CoA isomerase, mitochondrial OS=Mus musculus GN=Ech1 PE=1 SV=1	98.6591	0.346658	3	0
O35465	Peptidyl-prolyl cis-trans isomerase FKBP8 OS=Mus musculus GN=Fkbp8 PE=1 SV=2	95.0618	4.33973	5	0
O35593	26S proteasome non-ATPase regulatory subunit 14 OS=Mus musculus GN=Psmd14 PE=1 SV=2	95.3505	2.94736	6	0
O35638	Cohesin subunit SA-2 OS=Mus musculus GN=Stag2 PE=1 SV=3	90.6312	20.2471	6	0
O35658	Complement component 1 Q subcomponent-binding protein, mitochondrial OS=Mus musculus GN=C1qbp PE=1 SV=1	97.2766	3.08053	10	0
O35691	Pinin OS=Mus musculus GN=Pnn PE=1 SV=4	91.8017	12.6568	5	0
O35841	Apoptosis inhibitor 5 OS=Mus musculus GN=Api5 PE=1 SV=2	99.086	0.52449	3	0
O35857	Mitochondrial import inner membrane translocase subunit TIM44 OS=Mus musculus GN=Timm44 PE=1 SV=2	97.1764	2.72265	15	0
O35887	Calumenin OS=Mus musculus GN=Calu PE=1 SV=1	98.6881	1.72955	21	0
O35969	Guanidinoacetate N-methyltransferase OS=Mus musculus GN=Gamt PE=1 SV=1	97.4317	0.296021	2	0
O35972	39S ribosomal protein L23, mitochondrial OS=Mus musculus GN=Mrpl23 PE=2 SV=1	96.9662	0.855312	4	0
O54692	Centromere/kinetochore protein zw10 homolog OS=Mus musculus GN=Zw10 PE=2 SV=3	94.2379	2.39558	4	0
O54724	Polymerase I and transcript release factor OS=Mus musculus GN=Ptrf PE=1 SV=1	98.5157	0.660534	6	0
O54734	Dolichyl-diphosphooligosaccharide--protein glycosyltransferase 48 kDa subunit OS=Mus musculus GN=Ddost PE=1 SV=2	95.9385	3.66645	12	0
O54825	Bystin OS=Mus musculus GN=Bysl PE=1 SV=3	98.2372	1.71528	2	0
O54890	Integrin beta-3 OS=Mus musculus GN=Itgb3 PE=1 SV=2	99.5788	NA	1	0
O54941	SWI/SNF-related matrix-associated actin-dependent regulator of chromatin subfamily E member 1 OS=Mus musculus GN=Smarce1 PE=1 SV=1	96.6632	3.06794	6	0
O54946	DnaJ homolog subfamily B member 6 OS=Mus musculus GN=Dnajb6 PE=1 SV=4	99.7327	NA	1	0
O54962	Barrier-to-autointegration factor OS=Mus musculus GN=Banf1 PE=1 SV=1	99.5385	0.400036	2	0
O54984	ATPase Asna1 OS=Mus musculus GN=Asna1 PE=1 SV=2	97.1208	3.37213	3	0
O54998	Peptidyl-prolyl cis-trans isomerase FKBP7 OS=Mus musculus GN=Fkbp7 PE=1 SV=1	99.5569	0.290787	3	0
O55029	Coatomer subunit beta' OS=Mus musculus GN=Copb2 PE=2 SV=2	95.1751	2.85605	8	0
O55125	Protein NipSnap homolog 1 OS=Mus musculus GN=Nipsnap1 PE=1 SV=1	95.2293	4.4403	2	0
O55126	Protein NipSnap homolog 2 OS=Mus musculus GN=Gbas PE=2 SV=1	96.5726	3.06629	5	0
O55137	Acyl-coenzyme A thioesterase 1 OS=Mus musculus GN=Acot1 PE=1 SV=1	97.7197	1.89276	5	0
O55143	Sarcoplasmic/endoplasmic reticulum calcium ATPase 2 OS=Mus musculus GN=Atp2a2 PE=1 SV=2	94.4995	16.1534	32	0
O55201	Transcription elongation factor SPT5 OS=Mus musculus GN=Supt5h PE=1 SV=1	49.993	65.3023	2	0
O55222	Integrin-linked protein kinase OS=Mus musculus GN=Ilk PE=1 SV=2	97.8257	1.25137	4	0
O55240	11-cis retinol dehydrogenase OS=Mus musculus GN=Rdh5 PE=1 SV=1	99.4619	NA	1	0
O55242	Sigma non-opioid intracellular receptor 1 OS=Mus musculus GN=Sigmar1 PE=1 SV=1	92.0426	7.74314	3	0
O70133	ATP-dependent RNA helicase A OS=Mus musculus GN=Dhx9 PE=1 SV=2	97.3028	2.50149	29	0
O70152	Dolichol-phosphate mannosyltransferase subunit 1 OS=Mus musculus GN=Dpm1 PE=2 SV=1	96.8125	3.33222	4	0
O70194	Eukaryotic translation initiation factor 3 subunit D OS=Mus musculus GN=Eif3d PE=1 SV=2	67.4416	52.5494	3	0
O70251	Elongation factor 1-beta OS=Mus musculus GN=Eef1b PE=1 SV=5	96.1628	3.41634	2	0
O70310	Glycylpeptide N-tetradecanoyltransferase 1 OS=Mus musculus GN=Nmt1 PE=1 SV=1	98.8523	NA	1	0
O70373	Xin actin-binding repeat-containing protein 1 OS=Mus musculus GN=Xirp1 PE=1 SV=2	94.6701	NA	1	0
O70404	Vesicle-associated membrane protein 8 OS=Mus musculus GN=Vamp8 PE=1 SV=1	99.1425	0.154297	2	0
O70456	14-3-3 protein sigma OS=Mus musculus GN=Sfn PE=1 SV=2	98.1056	NA	1	0
O70492	Sorting nexin-3 OS=Mus musculus GN=Snx3 PE=1 SV=3	97.5719	2.94303	3	0
O70503	Estradiol 17-beta-dehydrogenase 12 OS=Mus musculus GN=Hsd17b12 PE=2 SV=1	98.0759	1.69322	8	0
O88207	Collagen alpha-1(V) chain OS=Mus musculus GN=Col5a1 PE=2 SV=2	97.9992	2.48895	6	0
O88532	Zinc finger RNA-binding protein OS=Mus musculus GN=Zfr PE=1 SV=2	97.2183	2.19249	3	0
O88569	Heterogeneous nuclear ribonucleoproteins A2/B1 OS=Mus musculus GN=Hnrnpa2b1 PE=1 SV=2	94.0668	6.53557	15	0
O88587	Catechol O-methyltransferase OS=Mus musculus GN=Comt PE=1 SV=2	97.3028	1.4097	6	0
O88693	Ceramide glucosyltransferase OS=Mus musculus GN=Ugcg PE=1 SV=1	98.5136	0.164698	2	0
O88696	ATP-dependent Clp protease proteolytic subunit, mitochondrial OS=Mus musculus GN=Clpp PE=1 SV=1	97.8292	2.26035	6	0
O88712	C-terminal-binding protein 1 OS=Mus musculus GN=Ctbp1 PE=1 SV=2	95.5369	3.40842	5	0
O88736	3-keto-steroid reductase OS=Mus musculus GN=Hsd17b7 PE=2 SV=1	99.0569	0.150176	4	0
O88829	Lactosylceramide alpha-2,3-sialyltransferase OS=Mus musculus GN=St3gal5 PE=2 SV=2	74.3908	48.3805	4	0
O88856	Protein-tyrosine sulfotransferase 2 OS=Mus musculus GN=Tpst2 PE=1 SV=1	94.4137	9.28202	3	0
O88967	ATP-dependent zinc metalloprotease YME1L1 OS=Mus musculus GN=Yme1l1 PE=2 SV=1	96.1129	3.77719	7	0
O88983	Syntaxin-8 OS=Mus musculus GN=Stx8 PE=1 SV=1	90.3546	NA	1	0
O88986	2-amino-3-ketobutyrate coenzyme A ligase, mitochondrial OS=Mus musculus GN=Gcat PE=1 SV=2	99.3828	NA	1	0
O88990	Alpha-actinin-3 OS=Mus musculus GN=Actn3 PE=2 SV=1	98.497	1.01654	5	0
O89001	Carboxypeptidase D OS=Mus musculus GN=Cpd PE=1 SV=2	97.6701	2.62082	11	0
O89017	Legumain OS=Mus musculus GN=Lgmn PE=1 SV=1	97.7995	NA	1	0
O89079	Coatomer subunit epsilon OS=Mus musculus GN=Cope PE=2 SV=3	97.8492	0.963311	3	0
P00375	Dihydrofolate reductase OS=Mus musculus GN=Dhfr PE=1 SV=3	96.4311	NA	1	0
P02463	Collagen alpha-1(IV) chain OS=Mus musculus GN=Col4a1 PE=2 SV=4	50.313	69.4092	2	0
P02468	Laminin subunit gamma-1 OS=Mus musculus GN=Lamc1 PE=1 SV=2	96.1107	2.60507	9	0
P03995	Glial fibrillary acidic protein OS=Mus musculus GN=Gfap PE=1 SV=4	74.2916	48.6811	4	0
P04760	Acetylcholine receptor subunit gamma OS=Mus musculus GN=Chrng PE=2 SV=1	97.5157	1.57592	2	0
P05202	Aspartate aminotransferase, mitochondrial OS=Mus musculus GN=Got2 PE=1 SV=1	95.0961	15.3149	22	0
P05213	Tubulin alpha-1B chain OS=Mus musculus GN=Tuba1b PE=1 SV=2	96.7684	2.54894	36	0
P05214	Tubulin alpha-3 chain OS=Mus musculus GN=Tuba3a PE=1 SV=1	97.1014	2.07902	20	0
P05977	Myosin light chain 1/3, skeletal muscle isoform OS=Mus musculus GN=Myl1 PE=1 SV=2	98.0372	2.55535	10	0
P06745	Glucose-6-phosphate isomerase OS=Mus musculus GN=Gpi PE=1 SV=4	84.2129	20.7642	2	0
P06802	Ectonucleotide pyrophosphatase/phosphodiesterase family member 1 OS=Mus musculus GN=Enpp1 PE=1 SV=4	82.512	23.8282	2	0
P06869	Urokinase-type plasminogen activator OS=Mus musculus GN=Plau PE=1 SV=1	95.1488	2.09659	5	0
P07091	Protein S100-A4 OS=Mus musculus GN=S100a4 PE=1 SV=1	98.2671	0.467233	3	0
P07356	Annexin A2 OS=Mus musculus GN=Anxa2 PE=1 SV=2	97.7089	2.30018	35	0
P08003	Protein disulfide-isomerase A4 OS=Mus musculus GN=Pdia4 PE=1 SV=3	97.5429	3.14519	24	0
P08030	Adenine phosphoribosyltransferase OS=Mus musculus GN=Aprt PE=1 SV=2	97.5353	NA	1	0
P08074	Carbonyl reductase [NADPH] 2 OS=Mus musculus GN=Cbr2 PE=1 SV=1	95.7943	4.00074	2	0
P08122	Collagen alpha-2(IV) chain OS=Mus musculus GN=Col4a2 PE=2 SV=4	98.9031	1.20274	2	0
P08207	Protein S100-A10 OS=Mus musculus GN=S100a10 PE=1 SV=2	98.7211	1.1816	7	0
P08228	Superoxide dismutase [Cu-Zn] OS=Mus musculus GN=Sod1 PE=1 SV=2	98.6838	1.00395	2	0
P08249	Malate dehydrogenase, mitochondrial OS=Mus musculus GN=Mdh2 PE=1 SV=3	97.0511	3.8354	35	0
P08551	Neurofilament light polypeptide OS=Mus musculus GN=Nefl PE=1 SV=5	96.7637	3.80717	4	0
P08553	Neurofilament medium polypeptide OS=Mus musculus GN=Nefm PE=1 SV=4	96.5822	0.701134	2	0
P08752	Guanine nucleotide-binding protein G(i) subunit alpha-2 OS=Mus musculus GN=Gnai2 PE=1 SV=5	97.9802	2.44307	8	0
P08775	DNA-directed RNA polymerase II subunit RPB1 OS=Mus musculus GN=Polr2a PE=1 SV=3	84.7781	32.7584	8	0
P09041	Phosphoglycerate kinase 2 OS=Mus musculus GN=Pgk2 PE=1 SV=4	97.1524	1.35871	5	0
P09055	Integrin beta-1 OS=Mus musculus GN=Itgb1 PE=1 SV=1	97.4592	2.68869	15	0
P09411	Phosphoglycerate kinase 1 OS=Mus musculus GN=Pgk1 PE=1 SV=4	97.4712	1.4158	18	0
P09671	Superoxide dismutase [Mn], mitochondrial OS=Mus musculus GN=Sod2 PE=1 SV=3	88.2799	27.751	11	0
P0DM40	Fer-1-like protein 5 OS=Mus musculus GN=Fer1l5 PE=1 SV=1	99.4451	NA	1	0
P10493	Nidogen-1 OS=Mus musculus GN=Nid1 PE=1 SV=2	77.4197	42.2853	5	0
P10605	Cathepsin B OS=Mus musculus GN=Ctsb PE=1 SV=2	97.7798	1.64643	11	0
P10649	Glutathione S-transferase Mu 1 OS=Mus musculus GN=Gstm1 PE=1 SV=2	96.1904	2.64298	7	0
P10833	Ras-related protein R-Ras OS=Mus musculus GN=Rras PE=2 SV=1	96.9651	2.23347	3	0
P10852	4F2 cell-surface antigen heavy chain OS=Mus musculus GN=Slc3a2 PE=1 SV=1	89.2309	26.9871	11	0
P11087	Collagen alpha-1(I) chain OS=Mus musculus GN=Col1a1 PE=1 SV=4	97.1671	2.56189	18	0
P11103	Poly [ADP-ribose] polymerase 1 OS=Mus musculus GN=Parp1 PE=1 SV=3	95.5892	3.60235	4	0
P11214	Tissue-type plasminogen activator OS=Mus musculus GN=Plat PE=1 SV=3	94.8425	NA	1	0
P11276	Fibronectin OS=Mus musculus GN=Fn1 PE=1 SV=4	94.2499	3.16222	70	0
P11499	Heat shock protein HSP 90-beta OS=Mus musculus GN=Hsp90ab1 PE=1 SV=3	97.4865	1.82263	15	0
P11688	Integrin alpha-5 OS=Mus musculus GN=Itga5 PE=1 SV=3	97.6241	2.84636	11	0
P11881	Inositol 1,4,5-trisphosphate receptor type 1 OS=Mus musculus GN=Itpr1 PE=1 SV=2	99.5852	0.432669	2	0
P11983	T-complex protein 1 subunit alpha OS=Mus musculus GN=Tcp1 PE=1 SV=3	88.8149	26.5542	12	0
P12382	ATP-dependent 6-phosphofructokinase, liver type OS=Mus musculus GN=Pfkl PE=1 SV=4	95.3911	2.75584	6	0
P12787	Cytochrome c oxidase subunit 5A, mitochondrial OS=Mus musculus GN=Cox5a PE=1 SV=2	98.4474	1.55955	17	0
P12815	Programmed cell death protein 6 OS=Mus musculus GN=Pdcd6 PE=1 SV=2	74.5345	38.9389	5	0
P13020	Gelsolin OS=Mus musculus GN=Gsn PE=1 SV=3	98.1107	1.71911	13	0
P13541	Myosin-3 OS=Mus musculus GN=Myh3 PE=2 SV=2	95.7811	15.6255	109	0
P13542	Myosin-8 OS=Mus musculus GN=Myh8 PE=2 SV=2	96.444	10.0364	67	0
P13595	Neural cell adhesion molecule 1 OS=Mus musculus GN=Ncam1 PE=1 SV=3	97.6317	2.90948	13	0
P14115	60S ribosomal protein L27a OS=Mus musculus GN=Rpl27a PE=2 SV=5	96.1377	2.103	3	0
P14152	Malate dehydrogenase, cytoplasmic OS=Mus musculus GN=Mdh1 PE=1 SV=3	96.743	0.780894	2	0
P14206	40S ribosomal protein SA OS=Mus musculus GN=Rpsa PE=1 SV=4	91.166	25.5044	13	0
P14426	H-2 class I histocompatibility antigen, D-K alpha chain OS=Mus musculus GN=H2-D1 PE=1 SV=1	99.4871	0.117385	3	0
P14602	Heat shock protein beta-1 OS=Mus musculus GN=Hspb1 PE=1 SV=3	97.5701	2.62956	25	0
P14685	26S proteasome non-ATPase regulatory subunit 3 OS=Mus musculus GN=Psmd3 PE=1 SV=3	87.0696	28.365	10	0
P14733	Lamin-B1 OS=Mus musculus GN=Lmnb1 PE=1 SV=3	97.257	2.53309	31	0
P14824	Annexin A6 OS=Mus musculus GN=Anxa6 PE=1 SV=3	95.9603	14.7693	41	0
P14869	60S acidic ribosomal protein P0 OS=Mus musculus GN=Rplp0 PE=1 SV=3	97.0274	2.47598	10	0
P14873	Microtubule-associated protein 1B OS=Mus musculus GN=Map1b PE=1 SV=2	94.3386	14.7217	17	0
P15532	Nucleoside diphosphate kinase A OS=Mus musculus GN=Nme1 PE=1 SV=1	99.4162	0.246373	3	0
P15864	Histone H1.2 OS=Mus musculus GN=Hist1h1c PE=1 SV=2	97.5334	2.24587	8	0
P16045	Galectin-1 OS=Mus musculus GN=Lgals1 PE=1 SV=3	96.8049	3.09133	7	0
P16332	Methylmalonyl-CoA mutase, mitochondrial OS=Mus musculus GN=Mut PE=1 SV=2	96.1415	3.23921	11	0
P16381	Putative ATP-dependent RNA helicase Pl10 OS=Mus musculus GN=D1Pas1 PE=2 SV=1	97.4387	2.17414	14	0
P16546	Spectrin alpha chain, non-erythrocytic 1 OS=Mus musculus GN=Sptan1 PE=1 SV=4	96.1861	12.372	55	0
P17156	Heat shock-related 70 kDa protein 2 OS=Mus musculus GN=Hspa2 PE=1 SV=2	97.8381	1.10353	9	0
P17182	Alpha-enolase OS=Mus musculus GN=Eno1 PE=1 SV=3	91.1255	23.4517	16	0
P17225	Polypyrimidine tract-binding protein 1 OS=Mus musculus GN=Ptbp1 PE=1 SV=2	95.5201	5.61285	9	0
P17426	AP-2 complex subunit alpha-1 OS=Mus musculus GN=Ap2a1 PE=1 SV=1	85.7875	33.2657	8	0
P17439	Glucosylceramidase OS=Mus musculus GN=Gba PE=1 SV=1	95.5804	6.9421	6	0
P17665	Cytochrome c oxidase subunit 7C, mitochondrial OS=Mus musculus GN=Cox7c PE=1 SV=1	99.0261	0.306481	2	0
P17751	Triosephosphate isomerase OS=Mus musculus GN=Tpi1 PE=1 SV=4	96.7412	2.58148	9	0
P18155	Bifunctional methylenetetrahydrofolate dehydrogenase/cyclohydrolase, mitochondrial OS=Mus musculus GN=Mthfd2 PE=1 SV=1	81.9853	37.4224	6	0
P18572	Basigin OS=Mus musculus GN=Bsg PE=1 SV=2	95.9758	3.94016	3	0
P19096	Fatty acid synthase OS=Mus musculus GN=Fasn PE=1 SV=2	91.6236	20.4462	21	0
P19123	Troponin C, slow skeletal and cardiac muscles OS=Mus musculus GN=Tnnc1 PE=2 SV=1	99.6638	0.359606	2	0
P19157	Glutathione S-transferase P 1 OS=Mus musculus GN=Gstp1 PE=1 SV=2	97.0741	3.15624	4	0
P19253	60S ribosomal protein L13a OS=Mus musculus GN=Rpl13a PE=1 SV=4	97.3947	2.18978	4	0
P19536	Cytochrome c oxidase subunit 5B, mitochondrial OS=Mus musculus GN=Cox5b PE=1 SV=1	97.4978	2.2055	8	0
P19639	Glutathione S-transferase Mu 3 OS=Mus musculus GN=Gstm3 PE=1 SV=2	96.0992	3.01638	5	0
P19783	Cytochrome c oxidase subunit 4 isoform 1, mitochondrial OS=Mus musculus GN=Cox4i1 PE=1 SV=2	93.0919	16.4345	10	0
P20029	78 kDa glucose-regulated protein OS=Mus musculus GN=Hspa5 PE=1 SV=3	98.3918	1.38599	46	0
P20060	Beta-hexosaminidase subunit beta OS=Mus musculus GN=Hexb PE=2 SV=2	99.0031	0.89265	2	0
P20108	Thioredoxin-dependent peroxide reductase, mitochondrial OS=Mus musculus GN=Prdx3 PE=1 SV=1	97.68	1.48123	9	0
P20152	Vimentin OS=Mus musculus GN=Vim PE=1 SV=3	97.8246	3.41797	53	0
P20444	Protein kinase C alpha type OS=Mus musculus GN=Prkca PE=1 SV=3	81.0593	18.5489	5	0
P21107	Tropomyosin alpha-3 chain OS=Mus musculus GN=Tpm3 PE=1 SV=3	96.774	2.8632	10	0
P21279	Guanine nucleotide-binding protein G(q) subunit alpha OS=Mus musculus GN=Gnaq PE=1 SV=4	97.0787	3.05304	5	0
P21550	Beta-enolase OS=Mus musculus GN=Eno3 PE=1 SV=3	96.9961	1.89639	10	0
P21619	Lamin-B2 OS=Mus musculus GN=Lmnb2 PE=1 SV=2	96.4301	6.28542	28	0
P21956	Lactadherin OS=Mus musculus GN=Mfge8 PE=1 SV=3	96.7775	2.35994	5	0
P21981	Protein-glutamine gamma-glutamyltransferase 2 OS=Mus musculus GN=Tgm2 PE=1 SV=4	96.9986	2.76128	4	0
P23475	X-ray repair cross-complementing protein 6 OS=Mus musculus GN=Xrcc6 PE=1 SV=5	97.5331	0.811472	3	0
P23927	Alpha-crystallin B chain OS=Mus musculus GN=Cryab PE=1 SV=2	96.7604	2.54308	4	0
P24270	Catalase OS=Mus musculus GN=Cat PE=1 SV=4	97.7537	1.42025	13	0
P24369	Peptidyl-prolyl cis-trans isomerase B OS=Mus musculus GN=Ppib PE=1 SV=2	98.6699	0.929027	10	0
P26039	Talin-1 OS=Mus musculus GN=Tln1 PE=1 SV=2	93.3003	17.9855	27	0
P26041	Moesin OS=Mus musculus GN=Msn PE=1 SV=3	97.6865	2.84428	18	0
P26443	Glutamate dehydrogenase 1, mitochondrial OS=Mus musculus GN=Glud1 PE=1 SV=1	95.9247	14.8446	44	0
P26883	Peptidyl-prolyl cis-trans isomerase FKBP1A OS=Mus musculus GN=Fkbp1a PE=1 SV=2	99.6274	NA	1	0
P27046	Alpha-mannosidase 2 OS=Mus musculus GN=Man2a1 PE=1 SV=2	97.5626	2.1264	20	0
P27546	Microtubule-associated protein 4 OS=Mus musculus GN=Map4 PE=1 SV=3	98.1606	1.93389	6	0
P27601	Guanine nucleotide-binding protein subunit alpha-13 OS=Mus musculus GN=Gna13 PE=1 SV=1	50.5865	63.3152	2	0
P27641	X-ray repair cross-complementing protein 5 OS=Mus musculus GN=Xrcc5 PE=2 SV=4	96.3622	4.27898	3	0
P27661	Histone H2AX OS=Mus musculus GN=H2afx PE=1 SV=2	96.9475	4.41908	22	0
P27773	Protein disulfide-isomerase A3 OS=Mus musculus GN=Pdia3 PE=1 SV=2	96.1029	13.7924	42	0
P28271	Cytoplasmic aconitate hydratase OS=Mus musculus GN=Aco1 PE=1 SV=3	57.7141	48.9465	3	0
P28352	DNA-(apurinic or apyrimidinic site) lyase OS=Mus musculus GN=Apex1 PE=1 SV=2	99.5193	NA	1	0
P28659	CUGBP Elav-like family member 1 OS=Mus musculus GN=Celf1 PE=1 SV=2	95.5177	2.95304	3	0
P28663	Beta-soluble NSF attachment protein OS=Mus musculus GN=Napb PE=1 SV=2	98.6504	1.1953	3	0
P30412	Peptidyl-prolyl cis-trans isomerase C OS=Mus musculus GN=Ppic PE=1 SV=1	99.1874	0.37947	5	0
P30677	Guanine nucleotide-binding protein subunit alpha-14 OS=Mus musculus GN=Gna14 PE=1 SV=2	99.4637	0.402933	2	0
P30999	Catenin delta-1 OS=Mus musculus GN=Ctnnd1 PE=1 SV=2	95.3943	11.6846	15	0
P31230	Aminoacyl tRNA synthase complex-interacting multifunctional protein 1 OS=Mus musculus GN=Aimp1 PE=1 SV=2	72.8876	44.4267	3	0
P31254	Ubiquitin-like modifier-activating enzyme 1 Y OS=Mus musculus GN=Uba1y PE=2 SV=2	96.1448	2.51972	4	0
P31324	cAMP-dependent protein kinase type II-beta regulatory subunit OS=Mus musculus GN=Prkar2b PE=1 SV=3	77.9728	42.5239	5	0
P32020	Non-specific lipid-transfer protein OS=Mus musculus GN=Scp2 PE=1 SV=3	98.1946	2.24044	6	0
P33146	Cadherin-15 OS=Mus musculus GN=Cdh15 PE=1 SV=3	86.1617	31.4841	9	0
P33267	Cytochrome P450 2F2 OS=Mus musculus GN=Cyp2f2 PE=2 SV=1	98.1574	2.35454	2	0
P34884	Macrophage migration inhibitory factor OS=Mus musculus GN=Mif PE=1 SV=2	95.699	2.54786	3	0
P35279	Ras-related protein Rab-6A OS=Mus musculus GN=Rab6a PE=1 SV=4	92.5438	11.13	6	0
P35283	Ras-related protein Rab-12 OS=Mus musculus GN=Rab12 PE=1 SV=3	97.2484	1.8233	2	0
P35293	Ras-related protein Rab-18 OS=Mus musculus GN=Rab18 PE=2 SV=2	98.5264	0.263585	2	0
P35486	Pyruvate dehydrogenase E1 component subunit alpha, somatic form, mitochondrial OS=Mus musculus GN=Pdha1 PE=1 SV=1	97.1944	2.76079	22	0
P35550	rRNA 2'-O-methyltransferase fibrillarin OS=Mus musculus GN=Fbl PE=2 SV=2	98.4658	2.73022	10	0
P35564	Calnexin OS=Mus musculus GN=Canx PE=1 SV=1	98.1673	2.99546	37	0
P35762	CD81 antigen OS=Mus musculus GN=Cd81 PE=1 SV=2	97.5134	NA	1	0
P36536	GTP-binding protein SAR1a OS=Mus musculus GN=Sar1a PE=2 SV=1	97.6907	2.02944	2	0
P36552	Oxygen-dependent coproporphyrinogen-III oxidase, mitochondrial OS=Mus musculus GN=Cpox PE=1 SV=2	92.111	2.33803	3	0
P37040	NADPH--cytochrome P450 reductase OS=Mus musculus GN=Por PE=1 SV=2	96.2654	4.52734	18	0
P38060	Hydroxymethylglutaryl-CoA lyase, mitochondrial OS=Mus musculus GN=Hmgcl PE=1 SV=2	94.5177	5.57264	2	0
P38647	Stress-70 protein, mitochondrial OS=Mus musculus GN=Hspa9 PE=1 SV=3	95.9514	12.9933	48	0
P39447	Tight junction protein ZO-1 OS=Mus musculus GN=Tjp1 PE=1 SV=2	97.8871	1.46764	5	0
P39688	Tyrosine-protein kinase Fyn OS=Mus musculus GN=Fyn PE=1 SV=4	97.642	2.06715	3	0
P40237	CD82 antigen OS=Mus musculus GN=Cd82 PE=1 SV=1	98.5062	0.546158	2	0
P40630	Transcription factor A, mitochondrial OS=Mus musculus GN=Tfam PE=1 SV=2	97.0223	3.50013	7	0
P41216	Long-chain-fatty-acid--CoA ligase 1 OS=Mus musculus GN=Acsl1 PE=1 SV=2	97.2939	2.89834	5	0
P42125	Enoyl-CoA delta isomerase 1, mitochondrial OS=Mus musculus GN=Eci1 PE=1 SV=2	98.4906	0.629652	11	0
P42208	Septin-2 OS=Mus musculus GN=Sept2 PE=1 SV=2	98.575	0.797013	3	0
P42669	Transcriptional activator protein Pur-alpha OS=Mus musculus GN=Pura PE=1 SV=1	99.7461	0.0133669	2	0
P43024	Cytochrome c oxidase subunit 6A1, mitochondrial OS=Mus musculus GN=Cox6a1 PE=1 SV=2	75.0811	46.7331	4	0
P43274	Histone H1.4 OS=Mus musculus GN=Hist1h1e PE=1 SV=2	96.9113	1.88856	7	0
P43275	Histone H1.1 OS=Mus musculus GN=Hist1h1a PE=1 SV=2	98.2807	0.985938	4	0
P43276	Histone H1.5 OS=Mus musculus GN=Hist1h1b PE=1 SV=2	95.6075	5.3729	5	0
P43406	Integrin alpha-V OS=Mus musculus GN=Itgav PE=1 SV=2	96.43	3.92975	14	0
P45377	Aldose reductase-related protein 2 OS=Mus musculus GN=Akr1b8 PE=1 SV=2	99.0346	0.607852	3	0
P45878	Peptidyl-prolyl cis-trans isomerase FKBP2 OS=Mus musculus GN=Fkbp2 PE=1 SV=1	97.118	3.96961	4	0
P45952	Medium-chain specific acyl-CoA dehydrogenase, mitochondrial OS=Mus musculus GN=Acadm PE=1 SV=1	98.0338	1.32854	16	0
P46425	Glutathione S-transferase P 2 OS=Mus musculus GN=Gstp2 PE=2 SV=2	99.677	NA	1	0
P46460	Vesicle-fusing ATPase OS=Mus musculus GN=Nsf PE=1 SV=2	97.3814	2.54799	10	0
P46471	26S protease regulatory subunit 7 OS=Mus musculus GN=Psmc2 PE=1 SV=5	91.7338	23.0477	18	0
P46660	Alpha-internexin OS=Mus musculus GN=Ina PE=1 SV=3	97.078	NA	1	0
P46935	E3 ubiquitin-protein ligase NEDD4 OS=Mus musculus GN=Nedd4 PE=1 SV=3	89.0855	16.7629	5	0
P47757	F-actin-capping protein subunit beta OS=Mus musculus GN=Capzb PE=1 SV=3	89.9364	13.9217	2	0
P47758	Signal recognition particle receptor subunit beta OS=Mus musculus GN=Srprb PE=1 SV=1	99.0155	0.538165	3	0
P47857	ATP-dependent 6-phosphofructokinase, muscle type OS=Mus musculus GN=Pfkm PE=1 SV=3	97.322	3.28667	4	0
P47911	60S ribosomal protein L6 OS=Mus musculus GN=Rpl6 PE=1 SV=3	97.497	2.34554	16	0
P47934	Carnitine O-acetyltransferase OS=Mus musculus GN=Crat PE=1 SV=3	97.547	1.94813	9	0
P47963	60S ribosomal protein L13 OS=Mus musculus GN=Rpl13 PE=2 SV=3	97.1197	1.94545	7	0
P48036	Annexin A5 OS=Mus musculus GN=Anxa5 PE=1 SV=1	98.2524	0.684154	11	0
P48410	ATP-binding cassette sub-family D member 1 OS=Mus musculus GN=Abcd1 PE=1 SV=1	72.8757	40.7901	5	0
P48678	Prelamin-A/C OS=Mus musculus GN=Lmna PE=1 SV=2	95.0877	14.2865	61	0
P48722	Heat shock 70 kDa protein 4L OS=Mus musculus GN=Hspa4l PE=1 SV=2	97.1446	3.20927	3	0
P48771	Cytochrome c oxidase subunit 7A2, mitochondrial OS=Mus musculus GN=Cox7a2 PE=1 SV=2	97.0816	1.32112	3	0
P48962	ADP/ATP translocase 1 OS=Mus musculus GN=Slc25a4 PE=1 SV=4	97.9262	1.89747	16	0
P48999	Arachidonate 5-lipoxygenase OS=Mus musculus GN=Alox5 PE=1 SV=3	96.1584	11.7233	19	0
P49070	Calcium signal-modulating cyclophilin ligand OS=Mus musculus GN=Camlg PE=1 SV=2	98.505	1.33233	2	0
P49586	Choline-phosphate cytidylyltransferase A OS=Mus musculus GN=Pcyt1a PE=1 SV=1	93.8645	5.69479	5	0
P49813	Tropomodulin-1 OS=Mus musculus GN=Tmod1 PE=2 SV=2	94.7387	4.21607	3	0
P49817	Caveolin-1 OS=Mus musculus GN=Cav1 PE=1 SV=1	98.1289	0.954745	4	0
P50171	Estradiol 17-beta-dehydrogenase 8 OS=Mus musculus GN=Hsd17b8 PE=1 SV=2	98.2907	0.692005	2	0
P50396	Rab GDP dissociation inhibitor alpha OS=Mus musculus GN=Gdi1 PE=1 SV=3	95.2449	4.56793	3	0
P50516	V-type proton ATPase catalytic subunit A OS=Mus musculus GN=Atp6v1a PE=1 SV=2	97.9486	2.25107	12	0
P50518	V-type proton ATPase subunit E 1 OS=Mus musculus GN=Atp6v1e1 PE=1 SV=2	98.825	1.24158	2	0
P50543	Protein S100-A11 OS=Mus musculus GN=S100a11 PE=1 SV=1	96.45	1.60498	3	0
P50544	Very long-chain specific acyl-CoA dehydrogenase, mitochondrial OS=Mus musculus GN=Acadvl PE=1 SV=3	93.3749	19.4902	33	0
P51150	Ras-related protein Rab-7a OS=Mus musculus GN=Rab7a PE=1 SV=2	97.8384	1.96807	12	0
P51174	Long-chain specific acyl-CoA dehydrogenase, mitochondrial OS=Mus musculus GN=Acadl PE=1 SV=2	98.5522	1.11654	16	0
P51175	Protoporphyrinogen oxidase OS=Mus musculus GN=Ppox PE=1 SV=1	98.7933	0.833665	2	0
P51410	60S ribosomal protein L9 OS=Mus musculus GN=Rpl9 PE=1 SV=2	97.3793	2.28927	7	0
P51660	Peroxisomal multifunctional enzyme type 2 OS=Mus musculus GN=Hsd17b4 PE=1 SV=3	97.494	1.85755	20	0
P51859	Hepatoma-derived growth factor OS=Mus musculus GN=Hdgf PE=1 SV=2	98.9609	NA	1	0
P51863	V-type proton ATPase subunit d 1 OS=Mus musculus GN=Atp6v0d1 PE=1 SV=2	91.6813	12.5428	9	0
P51881	ADP/ATP translocase 2 OS=Mus musculus GN=Slc25a5 PE=1 SV=3	98.1486	2.37227	13	0
P52019	Squalene monooxygenase OS=Mus musculus GN=Sqle PE=2 SV=1	78.2323	41.8747	5	0
P52196	Thiosulfate sulfurtransferase OS=Mus musculus GN=Tst PE=1 SV=3	96.8572	0.463019	2	0
P52432	DNA-directed RNA polymerases I and III subunit RPAC1 OS=Mus musculus GN=Polr1c PE=1 SV=3	99.5144	NA	1	0
P52480	Pyruvate kinase PKM OS=Mus musculus GN=Pkm PE=1 SV=4	96.0217	3.86858	29	0
P52503	NADH dehydrogenase [ubiquinone] iron-sulfur protein 6, mitochondrial OS=Mus musculus GN=Ndufs6 PE=1 SV=2	76.0015	45.7839	4	0
P52825	Carnitine O-palmitoyltransferase 2, mitochondrial OS=Mus musculus GN=Cpt2 PE=1 SV=2	97.4631	2.22317	18	0
P52927	High mobility group protein HMGI-C OS=Mus musculus GN=Hmga2 PE=1 SV=1	98.2882	0.915322	2	0
P53395	Lipoamide acyltransferase component of branched-chain alpha-keto acid dehydrogenase complex, mitochondrial OS=Mus musculus GN=Dbt PE=1 SV=2	96.1668	4.90663	2	0
P53702	Cytochrome c-type heme lyase OS=Mus musculus GN=Hccs PE=1 SV=2	97.7427	2.61394	6	0
P53994	Ras-related protein Rab-2A OS=Mus musculus GN=Rab2a PE=1 SV=1	98.118	2.15326	12	0
P53995	Anaphase-promoting complex subunit 1 OS=Mus musculus GN=Anapc1 PE=2 SV=2	96.9728	2.71955	4	0
P54071	Isocitrate dehydrogenase [NADP], mitochondrial OS=Mus musculus GN=Idh2 PE=1 SV=3	94.1598	17.0527	21	0
P54116	Erythrocyte band 7 integral membrane protein OS=Mus musculus GN=Stom PE=1 SV=3	84.8424	28.4869	6	0
P54823	Probable ATP-dependent RNA helicase DDX6 OS=Mus musculus GN=Ddx6 PE=1 SV=1	98.9237	NA	1	0
P55065	Phospholipid transfer protein OS=Mus musculus GN=Pltp PE=1 SV=1	97.6122	2.80101	9	0
P56135	ATP synthase subunit f, mitochondrial OS=Mus musculus GN=Atp5j2 PE=1 SV=3	97.9804	1.08539	2	0
P56380	Bis(5'-nucleosyl)-tetraphosphatase [asymmetrical] OS=Mus musculus GN=Nudt2 PE=1 SV=3	97.4459	NA	1	0
P56391	Cytochrome c oxidase subunit 6B1 OS=Mus musculus GN=Cox6b1 PE=1 SV=2	99.2305	0.512158	4	0
P56399	Ubiquitin carboxyl-terminal hydrolase 5 OS=Mus musculus GN=Usp5 PE=1 SV=1	96.3208	3.37143	5	0
P56480	ATP synthase subunit beta, mitochondrial OS=Mus musculus GN=Atp5b PE=1 SV=2	97.1713	4.11603	40	0
P57759	Endoplasmic reticulum resident protein 29 OS=Mus musculus GN=Erp29 PE=1 SV=2	86.3896	32.7189	8	0
P57780	Alpha-actinin-4 OS=Mus musculus GN=Actn4 PE=1 SV=1	97.8431	2.41201	17	0
P57784	U2 small nuclear ribonucleoprotein A' OS=Mus musculus GN=Snrpa1 PE=1 SV=2	95.2488	6.44519	7	0
P58044	Isopentenyl-diphosphate Delta-isomerase 1 OS=Mus musculus GN=Idi1 PE=2 SV=1	91.7216	12.7944	7	0
P58059	28S ribosomal protein S21, mitochondrial OS=Mus musculus GN=Mrps21 PE=2 SV=1	97.8404	1.70578	3	0
P58281	Dynamin-like 120 kDa protein, mitochondrial OS=Mus musculus GN=Opa1 PE=1 SV=1	97.0723	5.65664	17	0
P58742	Aladin OS=Mus musculus GN=Aaas PE=1 SV=1	98.4136	1.84382	5	0
P58774	Tropomyosin beta chain OS=Mus musculus GN=Tpm2 PE=1 SV=1	97.9186	2.03393	11	0
P59708	Splicing factor 3B subunit 6 OS=Mus musculus GN=Sf3b6 PE=1 SV=1	99.3118	NA	1	0
P60335	Poly(rC)-binding protein 1 OS=Mus musculus GN=Pcbp1 PE=1 SV=1	97.8419	1.95529	7	0
P60766	Cell division control protein 42 homolog OS=Mus musculus GN=Cdc42 PE=1 SV=2	96.1007	2.5336	3	0
P60867	40S ribosomal protein S20 OS=Mus musculus GN=Rps20 PE=1 SV=1	69.081	52.4257	3	0
P60904	DnaJ homolog subfamily C member 5 OS=Mus musculus GN=Dnajc5 PE=1 SV=1	94.9644	3.58131	4	0
P61022	Calcineurin B homologous protein 1 OS=Mus musculus GN=Chp1 PE=1 SV=2	99.3194	0.591284	3	0
P61161	Actin-related protein 2 OS=Mus musculus GN=Actr2 PE=1 SV=1	94.9503	7.40907	5	0
P61164	Alpha-centractin OS=Mus musculus GN=Actr1a PE=2 SV=1	97.621	1.54703	4	0
P61226	Ras-related protein Rap-2b OS=Mus musculus GN=Rap2b PE=1 SV=1	99.2852	0.701895	2	0
P61255	60S ribosomal protein L26 OS=Mus musculus GN=Rpl26 PE=1 SV=1	98.1047	1.20067	4	0
P61294	Ras-related protein Rab-6B OS=Mus musculus GN=Rab6b PE=1 SV=1	90.9931	13.7514	4	0
P61358	60S ribosomal protein L27 OS=Mus musculus GN=Rpl27 PE=1 SV=2	98.9639	0.472499	8	0
P61620	Protein transport protein Sec61 subunit alpha isoform 1 OS=Mus musculus GN=Sec61a1 PE=2 SV=2	98.0788	2.46176	8	0
P61750	ADP-ribosylation factor 4 OS=Mus musculus GN=Arf4 PE=1 SV=2	90.7712	15.9248	7	0
P61804	Dolichyl-diphosphooligosaccharide--protein glycosyltransferase subunit DAD1 OS=Mus musculus GN=Dad1 PE=2 SV=3	97.3901	2.48173	4	0
P61982	14-3-3 protein gamma OS=Mus musculus GN=Ywhag PE=1 SV=2	98.5997	0.995514	6	0
P62071	Ras-related protein R-Ras2 OS=Mus musculus GN=Rras2 PE=1 SV=1	96.3935	2.55742	8	0
P62075	Mitochondrial import inner membrane translocase subunit Tim13 OS=Mus musculus GN=Timm13 PE=1 SV=1	98.2538	1.61962	4	0
P62137	Serine/threonine-protein phosphatase PP1-alpha catalytic subunit OS=Mus musculus GN=Ppp1ca PE=1 SV=1	98.1651	1.54978	8	0
P62141	Serine/threonine-protein phosphatase PP1-beta catalytic subunit OS=Mus musculus GN=Ppp1cb PE=1 SV=3	97.4275	1.81055	10	0
P62192	26S protease regulatory subunit 4 OS=Mus musculus GN=Psmc1 PE=1 SV=1	93.3723	7.63465	6	0
P62196	26S protease regulatory subunit 8 OS=Mus musculus GN=Psmc5 PE=1 SV=1	97.2258	2.76823	12	0
P62242	40S ribosomal protein S8 OS=Mus musculus GN=Rps8 PE=1 SV=2	95.3613	5.79758	9	0
P62264	40S ribosomal protein S14 OS=Mus musculus GN=Rps14 PE=2 SV=3	97.2374	1.71097	8	0
P62270	40S ribosomal protein S18 OS=Mus musculus GN=Rps18 PE=1 SV=3	98.6401	1.15742	7	0
P62281	40S ribosomal protein S11 OS=Mus musculus GN=Rps11 PE=1 SV=3	96.3748	2.33738	3	0
P62305	Small nuclear ribonucleoprotein E OS=Mus musculus GN=Snrpe PE=2 SV=1	98.1085	NA	1	0
P62309	Small nuclear ribonucleoprotein G OS=Mus musculus GN=Snrpg PE=1 SV=1	98.739	0.828299	4	0
P62313	U6 snRNA-associated Sm-like protein LSm6 OS=Mus musculus GN=Lsm6 PE=3 SV=1	99.3078	NA	1	0
P62315	Small nuclear ribonucleoprotein Sm D1 OS=Mus musculus GN=Snrpd1 PE=2 SV=1	96.3146	3.74649	5	0
P62317	Small nuclear ribonucleoprotein Sm D2 OS=Mus musculus GN=Snrpd2 PE=2 SV=1	98.6141	0.528953	3	0
P62320	Small nuclear ribonucleoprotein Sm D3 OS=Mus musculus GN=Snrpd3 PE=1 SV=1	98.6145	0.104523	2	0
P62334	26S protease regulatory subunit 10B OS=Mus musculus GN=Psmc6 PE=1 SV=1	97.372	2.43916	11	0
P62492	Ras-related protein Rab-11A OS=Mus musculus GN=Rab11a PE=1 SV=3	97.56	1.47749	5	0
P62631	Elongation factor 1-alpha 2 OS=Mus musculus GN=Eef1a2 PE=1 SV=1	97.4489	1.33228	5	0
P62702	40S ribosomal protein S4, X isoform OS=Mus musculus GN=Rps4x PE=2 SV=2	89.7223	19.6397	18	0
P62717	60S ribosomal protein L18a OS=Mus musculus GN=Rpl18a PE=1 SV=1	97.8424	1.49977	7	0
P62737	Actin, aortic smooth muscle OS=Mus musculus GN=Acta2 PE=1 SV=1	97.4608	2.04921	39	0
P62746	Rho-related GTP-binding protein RhoB OS=Mus musculus GN=Rhob PE=1 SV=1	97.0325	3.54336	4	0
P62748	Hippocalcin-like protein 1 OS=Mus musculus GN=Hpcal1 PE=2 SV=2	99.4786	0.429484	3	0
P62806	Histone H4 OS=Mus musculus GN=Hist1h4a PE=1 SV=2	97.2494	1.69221	13	0
P62814	V-type proton ATPase subunit B, brain isoform OS=Mus musculus GN=Atp6v1b2 PE=1 SV=1	98.3911	1.54607	7	0
P62827	GTP-binding nuclear protein Ran OS=Mus musculus GN=Ran PE=1 SV=3	95.9308	2.19588	9	0
P62830	60S ribosomal protein L23 OS=Mus musculus GN=Rpl23 PE=1 SV=1	98.3725	0.71209	3	0
P62835	Ras-related protein Rap-1A OS=Mus musculus GN=Rap1a PE=2 SV=1	96.9407	3.6504	6	0
P62843	40S ribosomal protein S15 OS=Mus musculus GN=Rps15 PE=2 SV=2	95.6439	3.77431	4	0
P62852	40S ribosomal protein S25 OS=Mus musculus GN=Rps25 PE=1 SV=1	97.9683	2.65555	4	0
P62855	40S ribosomal protein S26 OS=Mus musculus GN=Rps26 PE=2 SV=3	98.1169	1.29353	3	0
P62892	60S ribosomal protein L39 OS=Mus musculus GN=Rpl39 PE=2 SV=2	95.2916	NA	1	0
P62908	40S ribosomal protein S3 OS=Mus musculus GN=Rps3 PE=1 SV=1	97.9448	1.10108	8	0
P62911	60S ribosomal protein L32 OS=Mus musculus GN=Rpl32 PE=1 SV=2	94.7033	5.08705	2	0
P62918	60S ribosomal protein L8 OS=Mus musculus GN=Rpl8 PE=1 SV=2	97.4937	4.21403	4	0
P62983	Ubiquitin-40S ribosomal protein S27a OS=Mus musculus GN=Rps27a PE=1 SV=2	98.047	0.548813	3	0
P62996	Transformer-2 protein homolog beta OS=Mus musculus GN=Tra2b PE=2 SV=1	97.4395	2.73307	5	0
P63024	Vesicle-associated membrane protein 3 OS=Mus musculus GN=Vamp3 PE=1 SV=1	86.6286	23.6103	4	0
P63038	60 kDa heat shock protein, mitochondrial OS=Mus musculus GN=Hspd1 PE=1 SV=1	97.1083	3.13523	54	0
P63094	Guanine nucleotide-binding protein G(s) subunit alpha isoforms short OS=Mus musculus GN=Gnas PE=1 SV=1	97.4164	2.40284	12	0
P63101	14-3-3 protein zeta/delta OS=Mus musculus GN=Ywhaz PE=1 SV=1	98.5889	0.688054	4	0
P63154	Crooked neck-like protein 1 OS=Mus musculus GN=Crnkl1 PE=1 SV=1	78.9292	38.1632	6	0
P63321	Ras-related protein Ral-A OS=Mus musculus GN=Rala PE=1 SV=1	98.1652	1.40149	2	0
P63323	40S ribosomal protein S12 OS=Mus musculus GN=Rps12 PE=1 SV=2	98.9121	1.17737	2	0
P67778	Prohibitin OS=Mus musculus GN=Phb PE=1 SV=1	93.613	19.9627	23	0
P67984	60S ribosomal protein L22 OS=Mus musculus GN=Rpl22 PE=1 SV=2	95.1279	3.73316	3	0
P68040	Guanine nucleotide-binding protein subunit beta-2-like 1 OS=Mus musculus GN=Gnb2l1 PE=1 SV=3	96.492	3.17041	11	0
P68134	Actin, alpha skeletal muscle OS=Mus musculus GN=Acta1 PE=1 SV=1	97.4936	2.1069	36	0
P68181	cAMP-dependent protein kinase catalytic subunit beta OS=Mus musculus GN=Prkacb PE=1 SV=2	98.343	0.893527	5	0
P68368	Tubulin alpha-4A chain OS=Mus musculus GN=Tuba4a PE=1 SV=1	96.2419	3.53326	31	0
P68369	Tubulin alpha-1A chain OS=Mus musculus GN=Tuba1a PE=1 SV=1	96.7684	2.54894	36	0
P68372	Tubulin beta-4B chain OS=Mus musculus GN=Tubb4b PE=1 SV=1	95.5103	11.8205	35	0
P68510	14-3-3 protein eta OS=Mus musculus GN=Ywhah PE=1 SV=2	96.061	3.56011	4	0
P70206	Plexin-A1 OS=Mus musculus GN=Plxna1 PE=1 SV=1	99.4421	NA	1	0
P70227	Inositol 1,4,5-trisphosphate receptor type 3 OS=Mus musculus GN=Itpr3 PE=1 SV=3	87.1698	27.7443	23	0
P70245	3-beta-hydroxysteroid-Delta(8),Delta(7)-isomerase OS=Mus musculus GN=Ebp PE=1 SV=3	98.3545	0.926817	2	0
P70255	Nuclear factor 1 C-type OS=Mus musculus GN=Nfic PE=1 SV=1	99.5728	NA	1	0
P70275	Semaphorin-3E OS=Mus musculus GN=Sema3e PE=1 SV=3	98.4417	NA	1	0
P70288	Histone deacetylase 2 OS=Mus musculus GN=Hdac2 PE=1 SV=1	97.7965	1.28825	5	0
P70302	Stromal interaction molecule 1 OS=Mus musculus GN=Stim1 PE=1 SV=2	97.4439	3.272	2	0
P70333	Heterogeneous nuclear ribonucleoprotein H2 OS=Mus musculus GN=Hnrnph2 PE=2 SV=1	97.8118	1.67843	6	0
P70336	Rho-associated protein kinase 2 OS=Mus musculus GN=Rock2 PE=1 SV=1	96.6908	0.323929	2	0
P70349	Histidine triad nucleotide-binding protein 1 OS=Mus musculus GN=Hint1 PE=1 SV=3	97.858	2.1494	2	0
P70388	DNA repair protein RAD50 OS=Mus musculus GN=Rad50 PE=1 SV=1	98.104	1.45227	9	0
P70398	Probable ubiquitin carboxyl-terminal hydrolase FAF-X OS=Mus musculus GN=Usp9x PE=1 SV=2	89.0711	17.6789	8	0
P70402	Myosin-binding protein H OS=Mus musculus GN=Mybph PE=1 SV=2	96.7946	1.34276	2	0
P70404	Isocitrate dehydrogenase [NAD] subunit gamma 1, mitochondrial OS=Mus musculus GN=Idh3g PE=1 SV=1	98.375	1.06494	5	0
P70452	Syntaxin-4 OS=Mus musculus GN=Stx4 PE=1 SV=1	97.5749	2.28767	2	0
P70670	Nascent polypeptide-associated complex subunit alpha, muscle-specific form OS=Mus musculus GN=Naca PE=1 SV=2	97.6497	2.79428	10	0
P70698	CTP synthase 1 OS=Mus musculus GN=Ctps1 PE=1 SV=2	97.8634	1.5846	6	0
P70699	Lysosomal alpha-glucosidase OS=Mus musculus GN=Gaa PE=1 SV=2	98.0902	0.924563	2	0
P80314	T-complex protein 1 subunit beta OS=Mus musculus GN=Cct2 PE=1 SV=4	96.2394	2.04745	7	0
P80316	T-complex protein 1 subunit epsilon OS=Mus musculus GN=Cct5 PE=1 SV=1	97.3165	1.73102	8	0
P80318	T-complex protein 1 subunit gamma OS=Mus musculus GN=Cct3 PE=1 SV=1	87.0327	30.734	9	0
P81117	Nucleobindin-2 OS=Mus musculus GN=Nucb2 PE=1 SV=2	98.8265	0.710871	6	0
P84084	ADP-ribosylation factor 5 OS=Mus musculus GN=Arf5 PE=1 SV=2	89.7614	19.4765	5	0
P84096	Rho-related GTP-binding protein RhoG OS=Mus musculus GN=Rhog PE=2 SV=1	98.8103	NA	1	0
P86048	60S ribosomal protein L10-like OS=Mus musculus GN=Rpl10l PE=2 SV=1	98.0075	2.55348	5	0
P97287	Induced myeloid leukemia cell differentiation protein Mcl-1 homolog OS=Mus musculus GN=Mcl1 PE=1 SV=3	52.6865	65.2898	2	0
P97324	Glucose-6-phosphate 1-dehydrogenase 2 OS=Mus musculus GN=G6pd2 PE=1 SV=3	94.5907	2.92711	4	0
P97346	Nucleoredoxin OS=Mus musculus GN=Nxn PE=1 SV=1	99.3522	NA	1	0
P97363	Serine palmitoyltransferase 2 OS=Mus musculus GN=Sptlc2 PE=2 SV=2	64.7726	38.77	2	0
P97384	Annexin A11 OS=Mus musculus GN=Anxa11 PE=1 SV=2	74.5226	44.3564	4	0
P97429	Annexin A4 OS=Mus musculus GN=Anxa4 PE=2 SV=4	97.1221	1.93653	12	0
P97449	Aminopeptidase N OS=Mus musculus GN=Anpep PE=1 SV=4	93.2951	11.8582	13	0
P97450	ATP synthase-coupling factor 6, mitochondrial OS=Mus musculus GN=Atp5j PE=1 SV=1	98.5177	1.00139	6	0
P97457	Myosin regulatory light chain 2, skeletal muscle isoform OS=Mus musculus GN=Mylpf PE=1 SV=3	98.4514	1.30124	15	0
P97464	Exostosin-1 OS=Mus musculus GN=Ext1 PE=1 SV=1	94.5838	3.1872	4	0
P97467	Peptidyl-glycine alpha-amidating monooxygenase OS=Mus musculus GN=Pam PE=1 SV=2	94.6806	1.87592	2	0
P97478	Ubiquinone biosynthesis protein COQ7 homolog OS=Mus musculus GN=Coq7 PE=2 SV=3	99.3749	NA	1	0
P97493	Thioredoxin, mitochondrial OS=Mus musculus GN=Txn2 PE=1 SV=1	98.6379	1.63979	4	0
P97807	Fumarate hydratase, mitochondrial OS=Mus musculus GN=Fh PE=1 SV=3	96.2637	3.89592	19	0
P97855	Ras GTPase-activating protein-binding protein 1 OS=Mus musculus GN=G3bp1 PE=1 SV=1	97.7954	1.18227	3	0
P97930	Thymidylate kinase OS=Mus musculus GN=Dtymk PE=2 SV=2	98.3857	0.587684	4	0
P98063	Bone morphogenetic protein 1 OS=Mus musculus GN=Bmp1 PE=1 SV=2	98.2806	0.664454	4	0
P99024	Tubulin beta-5 chain OS=Mus musculus GN=Tubb5 PE=1 SV=1	95.6888	11.3607	38	0
P99027	60S acidic ribosomal protein P2 OS=Mus musculus GN=Rplp2 PE=1 SV=3	97.9157	1.94855	13	0
P99028	Cytochrome b-c1 complex subunit 6, mitochondrial OS=Mus musculus GN=Uqcrh PE=1 SV=2	52.4965	66.9782	2	0
Q00PI9	Heterogeneous nuclear ribonucleoprotein U-like protein 2 OS=Mus musculus GN=Hnrnpul2 PE=1 SV=2	92.9858	4.37984	5	0
Q01320	DNA topoisomerase 2-alpha OS=Mus musculus GN=Top2a PE=1 SV=2	97.9548	2.25793	22	0
Q01768	Nucleoside diphosphate kinase B OS=Mus musculus GN=Nme2 PE=1 SV=1	99.1477	0.499297	4	0
Q01853	Transitional endoplasmic reticulum ATPase OS=Mus musculus GN=Vcp PE=1 SV=4	94.5514	14.3023	31	0
Q02013	Aquaporin-1 OS=Mus musculus GN=Aqp1 PE=1 SV=3	99.0413	NA	1	0
Q02053	Ubiquitin-like modifier-activating enzyme 1 OS=Mus musculus GN=Uba1 PE=1 SV=1	95.6577	3.83221	21	0
Q02248	Catenin beta-1 OS=Mus musculus GN=Ctnnb1 PE=1 SV=1	97.8656	2.77475	9	0
Q02257	Junction plakoglobin OS=Mus musculus GN=Jup PE=1 SV=3	90.6118	24.2947	14	0
Q02566	Myosin-6 OS=Mus musculus GN=Myh6 PE=1 SV=2	98.4145	1.83313	27	0
Q02819	Nucleobindin-1 OS=Mus musculus GN=Nucb1 PE=1 SV=2	97.8913	1.69475	16	0
Q03145	Ephrin type-A receptor 2 OS=Mus musculus GN=Epha2 PE=1 SV=3	95.4993	1.97095	5	0
Q03265	ATP synthase subunit alpha, mitochondrial OS=Mus musculus GN=Atp5a1 PE=1 SV=1	98.1151	1.56105	34	0
Q04750	DNA topoisomerase 1 OS=Mus musculus GN=Top1 PE=1 SV=2	87.7818	30.9044	9	0
Q04857	Collagen alpha-1(VI) chain OS=Mus musculus GN=Col6a1 PE=2 SV=1	98.1634	NA	1	0
Q05144	Ras-related C3 botulinum toxin substrate 2 OS=Mus musculus GN=Rac2 PE=2 SV=1	95.3589	NA	1	0
Q05186	Reticulocalbin-1 OS=Mus musculus GN=Rcn1 PE=1 SV=1	90.3042	25.1849	14	0
Q05793	Basement membrane-specific heparan sulfate proteoglycan core protein OS=Mus musculus GN=Hspg2 PE=1 SV=1	92.5338	16.3824	29	0
Q05920	Pyruvate carboxylase, mitochondrial OS=Mus musculus GN=Pc PE=1 SV=1	96.5396	2.58316	8	0
Q05D44	Eukaryotic translation initiation factor 5B OS=Mus musculus GN=Eif5b PE=1 SV=2	75.4116	37.8866	7	0
Q06185	ATP synthase subunit e, mitochondrial OS=Mus musculus GN=Atp5i PE=1 SV=2	96.984	1.37511	4	0
Q07079	Insulin-like growth factor-binding protein 5 OS=Mus musculus GN=Igfbp5 PE=1 SV=1	97.1467	1.16307	2	0
Q07133	Histone H1t OS=Mus musculus GN=Hist1h1t PE=1 SV=4	96.0743	2.21696	4	0
Q07417	Short-chain specific acyl-CoA dehydrogenase, mitochondrial OS=Mus musculus GN=Acads PE=1 SV=2	96.1596	2.80043	10	0
Q0GNC1	Inverted formin-2 OS=Mus musculus GN=Inf2 PE=1 SV=1	51.9818	66.3762	2	0
Q11011	Puromycin-sensitive aminopeptidase OS=Mus musculus GN=Npepps PE=1 SV=2	97.1161	1.49637	9	0
Q14C51	Pentatricopeptide repeat domain-containing protein 3, mitochondrial OS=Mus musculus GN=Ptcd3 PE=2 SV=2	73.8747	47.8176	4	0
Q14CH7	Alanine--tRNA ligase, mitochondrial OS=Mus musculus GN=Aars2 PE=2 SV=1	89.4645	21.602	5	0
Q1HFZ0	tRNA (cytosine(34)-C(5))-methyltransferase OS=Mus musculus GN=Nsun2 PE=1 SV=2	95.8166	2.27511	9	0
Q1XH17	Tripartite motif-containing protein 72 OS=Mus musculus GN=Trim72 PE=1 SV=1	98.5793	1.23147	11	0
Q2TPA8	Hydroxysteroid dehydrogenase-like protein 2 OS=Mus musculus GN=Hsdl2 PE=1 SV=1	74.624	39.3768	5	0
Q32MW3	Acyl-coenzyme A thioesterase 10, mitochondrial OS=Mus musculus GN=Acot10 PE=2 SV=1	98.2807	1.04949	12	0
Q3MI48	Junctional sarcoplasmic reticulum protein 1 OS=Mus musculus GN=Jsrp1 PE=1 SV=2	93.2191	10.4848	6	0
Q3TBW2	39S ribosomal protein L10, mitochondrial OS=Mus musculus GN=Mrpl10 PE=2 SV=2	95.6605	5.11383	4	0
Q3TC46	Protein PAT1 homolog 1 OS=Mus musculus GN=Patl1 PE=1 SV=2	97.7641	NA	1	0
Q3TC72	Fumarylacetoacetate hydrolase domain-containing protein 2A OS=Mus musculus GN=Fahd2 PE=1 SV=1	99.6006	NA	1	0
Q3TCH7	Cullin-4A OS=Mus musculus GN=Cul4a PE=1 SV=1	97.3217	2.34683	5	0
Q3TCN2	Putative phospholipase B-like 2 OS=Mus musculus GN=Plbd2 PE=1 SV=2	96.9622	3.53238	2	0
Q3TDN2	FAS-associated factor 2 OS=Mus musculus GN=Faf2 PE=2 SV=2	98.1941	1.73252	4	0
Q3TDQ1	Dolichyl-diphosphooligosaccharide--protein glycosyltransferase subunit STT3B OS=Mus musculus GN=Stt3b PE=1 SV=2	99.0304	0.617069	8	0
Q3TEA8	Heterochromatin protein 1-binding protein 3 OS=Mus musculus GN=Hp1bp3 PE=1 SV=1	98.8838	0.365753	2	0
Q3THE2	Myosin regulatory light chain 12B OS=Mus musculus GN=Myl12b PE=1 SV=2	95.7951	3.36189	6	0
Q3THK7	GMP synthase [glutamine-hydrolyzing] OS=Mus musculus GN=Gmps PE=1 SV=2	97.4663	1.85926	10	0
Q3TIX9	U4/U6.U5 tri-snRNP-associated protein 2 OS=Mus musculus GN=Usp39 PE=2 SV=2	98.6875	1.58711	8	0
Q3TJD7	PDZ and LIM domain protein 7 OS=Mus musculus GN=Pdlim7 PE=2 SV=1	96.5478	2.43166	6	0
Q3TJZ6	Protein FAM98A OS=Mus musculus GN=Fam98a PE=2 SV=1	93.8835	NA	1	0
Q3TKT4	Transcription activator BRG1 OS=Mus musculus GN=Smarca4 PE=1 SV=1	92.8289	12.91	16	0
Q3TLP5	Enoyl-CoA hydratase domain-containing protein 2, mitochondrial OS=Mus musculus GN=Echdc2 PE=1 SV=2	98.6623	0.9925	2	0
Q3TLX0	Putative uncharacterized protein (Fragment) OS=Mus musculus GN=Rbm15 PE=2 SV=1	99.5144	NA	1	0
Q3TMP8	Trimeric intracellular cation channel type A OS=Mus musculus GN=Tmem38a PE=1 SV=2	96.8769	3.21086	2	0
Q3TMX7	Sulfhydryl oxidase 2 OS=Mus musculus GN=Qsox2 PE=2 SV=1	95.3334	NA	1	0
Q3TPJ5	Putative uncharacterized protein OS=Mus musculus GN=Exd2 PE=2 SV=1	90.7285	NA	1	0
Q3TRM4	Neuropathy target esterase OS=Mus musculus GN=Pnpla6 PE=2 SV=2	96.2436	NA	1	0
Q3TVI8	Pre-B-cell leukemia transcription factor-interacting protein 1 OS=Mus musculus GN=Pbxip1 PE=1 SV=2	90.3692	24.2154	16	0
Q3TW96	UDP-N-acetylhexosamine pyrophosphorylase-like protein 1 OS=Mus musculus GN=Uap1l1 PE=2 SV=1	98.7401	0.621895	3	0
Q3TWW8	Serine/arginine-rich splicing factor 6 OS=Mus musculus GN=Srsf6 PE=2 SV=1	98.0741	2.06102	9	0
Q3TXS7	26S proteasome non-ATPase regulatory subunit 1 OS=Mus musculus GN=Psmd1 PE=1 SV=1	98.6414	0.906793	7	0
Q3TZZ7	Extended synaptotagmin-2 OS=Mus musculus GN=Esyt2 PE=1 SV=1	90.1148	25.7336	15	0
Q3U0V1	Far upstream element-binding protein 2 OS=Mus musculus GN=Khsrp PE=1 SV=2	95.3569	4.83276	2	0
Q3U0V2	Tumor necrosis factor receptor type 1-associated DEATH domain protein OS=Mus musculus GN=Tradd PE=1 SV=1	97.317	1.47693	3	0
Q3U186	Probable arginine--tRNA ligase, mitochondrial OS=Mus musculus GN=Rars2 PE=1 SV=1	84.3535	36.5578	7	0
Q3U1J4	DNA damage-binding protein 1 OS=Mus musculus GN=Ddb1 PE=1 SV=2	97.6623	2.39777	11	0
Q3U7R1	Extended synaptotagmin-1 OS=Mus musculus GN=Esyt1 PE=1 SV=2	96.765	8.63044	35	0
Q3U962	Collagen alpha-2(V) chain OS=Mus musculus GN=Col5a2 PE=1 SV=1	96.9647	3.50319	5	0
Q3U9G9	Lamin-B receptor OS=Mus musculus GN=Lbr PE=1 SV=2	83.0515	36.5188	6	0
Q3UEB3	Poly(U)-binding-splicing factor PUF60 OS=Mus musculus GN=Puf60 PE=2 SV=2	92.7313	0.798336	2	0
Q3UGP8	Putative Dol-P-Glc:Glc(2)Man(9)GlcNAc(2)-PP-Dol alpha-1,2-glucosyltransferase OS=Mus musculus GN=Alg10b PE=2 SV=1	99.0511	NA	1	0
Q3UHB1	5'-nucleotidase domain-containing protein 3 OS=Mus musculus GN=Nt5dc3 PE=2 SV=1	92.691	9.82247	8	0
Q3UJB9	Enhancer of mRNA-decapping protein 4 OS=Mus musculus GN=Edc4 PE=1 SV=2	96.6696	0.975427	5	0
Q3UJU9	Regulator of microtubule dynamics protein 3 OS=Mus musculus GN=Rmdn3 PE=1 SV=2	97.7023	0.426586	3	0
Q3UKJ7	WD40 repeat-containing protein SMU1 OS=Mus musculus GN=Smu1 PE=2 SV=2	98.896	1.23184	4	0
Q3ULD5	Methylcrotonoyl-CoA carboxylase beta chain, mitochondrial OS=Mus musculus GN=Mccc2 PE=1 SV=1	95.6921	4.41507	7	0
Q3ULJ0	Glycerol-3-phosphate dehydrogenase 1-like protein OS=Mus musculus GN=Gpd1l PE=1 SV=2	91.4511	NA	1	0
Q3UM45	Protein phosphatase 1 regulatory subunit 7 OS=Mus musculus GN=Ppp1r7 PE=1 SV=2	94.096	1.80527	2	0
Q3UMB9	WASH complex subunit 7 OS=Mus musculus GN=Kiaa1033 PE=2 SV=2	97.8575	1.12163	3	0
Q3UMR5	Calcium uniporter protein, mitochondrial OS=Mus musculus GN=Mcu PE=1 SV=2	88.8008	27.4565	13	0
Q3UN02	Lysocardiolipin acyltransferase 1 OS=Mus musculus GN=Lclat1 PE=2 SV=2	97.1047	3.67584	2	0
Q3UQ84	Threonine--tRNA ligase, mitochondrial OS=Mus musculus GN=Tars2 PE=2 SV=1	95.6983	3.02319	5	0
Q3URQ0	Testis-expressed sequence 10 protein OS=Mus musculus GN=Tex10 PE=1 SV=1	97.5476	2.83868	6	0
Q3URS9	Coiled-coil domain-containing protein 51 OS=Mus musculus GN=Ccdc51 PE=2 SV=1	96.1208	3.76595	6	0
Q3USZ8	Deleted in autism protein 1 homolog OS=Mus musculus PE=1 SV=2	98.467	0.160429	2	0
Q3UVK0	Endoplasmic reticulum metallopeptidase 1 OS=Mus musculus GN=Ermp1 PE=2 SV=2	96.858	1.95877	6	0
Q3UVL4	Vacuolar protein sorting-associated protein 51 homolog OS=Mus musculus GN=Vps51 PE=2 SV=2	98.8279	NA	1	0
Q3UX10	Tubulin alpha chain-like 3 OS=Mus musculus GN=Tubal3 PE=2 SV=2	97.8098	1.40308	5	0
Q3V009	Transmembrane emp24 domain-containing protein 1 OS=Mus musculus GN=Tmed1 PE=2 SV=1	96.4629	2.12472	2	0
Q3V132	ADP/ATP translocase 4 OS=Mus musculus GN=Slc25a31 PE=2 SV=1	98.6471	1.18264	5	0
Q3V3R1	Monofunctional C1-tetrahydrofolate synthase, mitochondrial OS=Mus musculus GN=Mthfd1l PE=1 SV=2	94.9249	12.6993	32	0
Q499X7	Coronin OS=Mus musculus GN=Coro1c PE=2 SV=1	97.2747	3.67754	4	0
Q4FK66	Pre-mRNA-splicing factor 38A OS=Mus musculus GN=Prpf38a PE=1 SV=1	94.0947	3.29105	2	0
Q4FZC9	Nesprin-3 OS=Mus musculus GN=Syne3 PE=1 SV=1	74.0956	40.9522	5	0
Q4PJX1	Protein odr-4 homolog OS=Mus musculus GN=Odr4 PE=2 SV=2	98.4823	1.72303	3	0
Q4PZA2	Endothelin-converting enzyme 1 OS=Mus musculus GN=Ece1 PE=1 SV=1	96.98	3.51841	2	0
Q4VA53	Sister chromatid cohesion protein PDS5 homolog B OS=Mus musculus GN=Pds5b PE=1 SV=1	97.7983	1.46146	11	0
Q4VAE3	Transmembrane protein 65 OS=Mus musculus GN=Tmem65 PE=2 SV=1	96.3852	2.81208	5	0
Q4VBD2	Transmembrane anterior posterior transformation protein 1 OS=Mus musculus GN=Tapt1 PE=2 SV=2	94.1697	1.10292	2	0
Q4VBE8	WD repeat-containing protein 18 OS=Mus musculus GN=Wdr18 PE=1 SV=1	98.6076	0.913685	7	0
Q501J6	Probable ATP-dependent RNA helicase DDX17 OS=Mus musculus GN=Ddx17 PE=1 SV=1	97.6192	2.09575	14	0
Q505D7	Optic atrophy 3 protein homolog OS=Mus musculus GN=Opa3 PE=1 SV=1	96.3115	2.57403	3	0
Q505N7	Sulfurtransferase OS=Mus musculus GN=Mpst PE=2 SV=1	97.7401	1.49132	8	0
Q52KR3	Protein prune homolog 2 OS=Mus musculus GN=Prune2 PE=2 SV=2	98.2782	NA	1	0
Q566J8	AarF domain-containing protein kinase 4 OS=Mus musculus GN=Adck4 PE=2 SV=1	99.9061	NA	1	0
Q569Z5	Probable ATP-dependent RNA helicase DDX46 OS=Mus musculus GN=Ddx46 PE=1 SV=2	89.2345	15.4421	4	0
Q569Z6	Thyroid hormone receptor-associated protein 3 OS=Mus musculus GN=Thrap3 PE=1 SV=1	96.3151	2.61997	5	0
Q59J78	Mimitin, mitochondrial OS=Mus musculus GN=Ndufaf2 PE=2 SV=1	97.5301	1.87593	5	0
Q5EG47	5'-AMP-activated protein kinase catalytic subunit alpha-1 OS=Mus musculus GN=Prkaa1 PE=1 SV=2	92.5832	6.88048	5	0
Q5F2E8	Serine/threonine-protein kinase TAO1 OS=Mus musculus GN=Taok1 PE=1 SV=1	97.2368	0.224639	2	0
Q5H8C4	Vacuolar protein sorting-associated protein 13A OS=Mus musculus GN=Vps13a PE=2 SV=1	97.4111	1.7423	8	0
Q5HZI9	Solute carrier family 25 member 51 OS=Mus musculus GN=Slc25a51 PE=2 SV=1	98.5017	0.793202	4	0
Q5RKZ7	Molybdenum cofactor biosynthesis protein 1 OS=Mus musculus GN=Mocs1 PE=1 SV=2	8.50052	NA	1	0
Q5SF07	Insulin-like growth factor 2 mRNA-binding protein 2 OS=Mus musculus GN=Igf2bp2 PE=1 SV=1	95.9824	4.86903	2	0
Q5SQX6	Cytoplasmic FMR1-interacting protein 2 OS=Mus musculus GN=Cyfip2 PE=1 SV=2	96.8215	1.14138	2	0
Q5SS80	Dehydrogenase/reductase SDR family member 13 OS=Mus musculus GN=Dhrs13 PE=2 SV=1	98.4995	1.5385	3	0
Q5SSK3	Transcription elongation factor, mitochondrial OS=Mus musculus GN=Tefm PE=2 SV=1	96.8789	1.12889	3	0
Q5SSZ5	Tensin-3 OS=Mus musculus GN=Tns3 PE=1 SV=1	98.4894	1.55749	2	0
Q5SUF2	Luc7-like protein 3 OS=Mus musculus GN=Luc7l3 PE=1 SV=1	98.3602	0.8347	5	0
Q5SWU9	Acetyl-CoA carboxylase 1 OS=Mus musculus GN=Acaca PE=1 SV=1	97.4936	2.48989	5	0
Q5SX39	Myosin-4 OS=Mus musculus GN=Myh4 PE=1 SV=1	95.9835	10.7809	67	0
Q5SX40	Myosin-1 OS=Mus musculus GN=Myh1 PE=2 SV=1	98.602	1.52747	79	0
Q5U458	DnaJ homolog subfamily C member 11 OS=Mus musculus GN=Dnajc11 PE=2 SV=2	96.7215	2.39822	7	0
Q5XG71	Small subunit processome component 20 homolog OS=Mus musculus GN=Utp20 PE=2 SV=2	97.1178	2.63256	9	0
Q60597	2-oxoglutarate dehydrogenase, mitochondrial OS=Mus musculus GN=Ogdh PE=1 SV=3	97.2789	1.99792	36	0
Q60605	Myosin light polypeptide 6 OS=Mus musculus GN=Myl6 PE=1 SV=3	99.1886	0.621813	7	0
Q60668	Heterogeneous nuclear ribonucleoprotein D0 OS=Mus musculus GN=Hnrnpd PE=1 SV=2	98.5927	0.952252	5	0
Q60715	Prolyl 4-hydroxylase subunit alpha-1 OS=Mus musculus GN=P4ha1 PE=2 SV=2	95.3067	8.45195	21	0
Q60716	Prolyl 4-hydroxylase subunit alpha-2 OS=Mus musculus GN=P4ha2 PE=1 SV=1	89.81	27.0483	11	0
Q60737	Casein kinase II subunit alpha OS=Mus musculus GN=Csnk2a1 PE=1 SV=2	72.281	43.2104	4	0
Q60749	KH domain-containing, RNA-binding, signal transduction-associated protein 1 OS=Mus musculus GN=Khdrbs1 PE=1 SV=2	97.3889	2.29458	5	0
Q60759	Glutaryl-CoA dehydrogenase, mitochondrial OS=Mus musculus GN=Gcdh PE=1 SV=2	96.4563	4.78647	3	0
Q60770	Syntaxin-binding protein 3 OS=Mus musculus GN=Stxbp3 PE=1 SV=1	99.4991	0.551116	4	0
Q60817	Nascent polypeptide-associated complex subunit alpha OS=Mus musculus GN=Naca PE=1 SV=1	98.3665	0.626111	3	0
Q60847	Collagen alpha-1(XII) chain OS=Mus musculus GN=Col12a1 PE=2 SV=3	94.6975	16.0959	29	0
Q60864	Stress-induced-phosphoprotein 1 OS=Mus musculus GN=Stip1 PE=1 SV=1	96.5786	3.01267	2	0
Q60865	Caprin-1 OS=Mus musculus GN=Caprin1 PE=1 SV=2	98.5994	1.1177	2	0
Q60930	Voltage-dependent anion-selective channel protein 2 OS=Mus musculus GN=Vdac2 PE=1 SV=2	98.7093	0.994423	12	0
Q60936	Chaperone activity of bc1 complex-like, mitochondrial OS=Mus musculus GN=Adck3 PE=1 SV=2	97.6601	NA	1	0
Q60953	Protein PML OS=Mus musculus GN=Pml PE=1 SV=3	96.6339	2.36069	3	0
Q60960	Importin subunit alpha-5 OS=Mus musculus GN=Kpna1 PE=1 SV=2	97.0591	2.91682	3	0
Q61001	Laminin subunit alpha-5 OS=Mus musculus GN=Lama5 PE=1 SV=4	96.4702	2.67262	26	0
Q61029	Lamina-associated polypeptide 2, isoforms beta/delta/epsilon/gamma OS=Mus musculus GN=Tmpo PE=1 SV=4	89.2542	28.6676	11	0
Q61033	Lamina-associated polypeptide 2, isoforms alpha/zeta OS=Mus musculus GN=Tmpo PE=1 SV=4	91.2675	24.4322	15	0
Q61102	ATP-binding cassette sub-family B member 7, mitochondrial OS=Mus musculus GN=Abcb7 PE=1 SV=3	96.9351	2.70421	9	0
Q61136	Serine/threonine-protein kinase PRP4 homolog OS=Mus musculus GN=Prpf4b PE=1 SV=3	86.8304	24.7847	5	0
Q61171	Peroxiredoxin-2 OS=Mus musculus GN=Prdx2 PE=1 SV=3	95.0311	6.01613	2	0
Q61191	Host cell factor 1 OS=Mus musculus GN=Hcfc1 PE=1 SV=2	87.7649	29.9181	10	0
Q61263	Sterol O-acyltransferase 1 OS=Mus musculus GN=Soat1 PE=1 SV=2	95.4923	3.91315	3	0
Q61292	Laminin subunit beta-2 OS=Mus musculus GN=Lamb2 PE=2 SV=2	96.4415	2.15727	9	0
Q61301	Catenin alpha-2 OS=Mus musculus GN=Ctnna2 PE=1 SV=3	97.5229	NA	1	0
Q61335	B-cell receptor-associated protein 31 OS=Mus musculus GN=Bcap31 PE=1 SV=4	98.6782	1.21446	10	0
Q61390	T-complex protein 1 subunit zeta-2 OS=Mus musculus GN=Cct6b PE=2 SV=4	96.4275	1.96745	2	0
Q61425	Hydroxyacyl-coenzyme A dehydrogenase, mitochondrial OS=Mus musculus GN=Hadh PE=1 SV=2	90.1095	24.3014	16	0
Q61550	Double-strand-break repair protein rad21 homolog OS=Mus musculus GN=Rad21 PE=1 SV=3	97.5892	2.38943	8	0
Q61553	Fascin OS=Mus musculus GN=Fscn1 PE=1 SV=4	98.3815	0.855531	7	0
Q61576	Peptidyl-prolyl cis-trans isomerase FKBP10 OS=Mus musculus GN=Fkbp10 PE=1 SV=2	98.6588	1.1638	9	0
Q61578	NADPH:adrenodoxin oxidoreductase, mitochondrial OS=Mus musculus GN=Fdxr PE=2 SV=1	96.5315	2.84693	4	0
Q61584	Fragile X mental retardation syndrome-related protein 1 OS=Mus musculus GN=Fxr1 PE=1 SV=2	85.7007	32.5598	15	0
Q61595	Kinectin OS=Mus musculus GN=Ktn1 PE=2 SV=1	97.6785	1.88928	23	0
Q61686	Chromobox protein homolog 5 OS=Mus musculus GN=Cbx5 PE=1 SV=1	86.2165	27.1665	7	0
Q61687	Transcriptional regulator ATRX OS=Mus musculus GN=Atrx PE=1 SV=3	98.187	1.83957	4	0
Q61699	Heat shock protein 105 kDa OS=Mus musculus GN=Hsph1 PE=1 SV=2	96.2641	1.30955	5	0
Q61733	28S ribosomal protein S31, mitochondrial OS=Mus musculus GN=Mrps31 PE=2 SV=1	97.379	2.03932	11	0
Q61738	Integrin alpha-7 OS=Mus musculus GN=Itga7 PE=1 SV=3	93.7358	20.7514	22	0
Q61753	D-3-phosphoglycerate dehydrogenase OS=Mus musculus GN=Phgdh PE=1 SV=3	97.4996	0.722918	6	0
Q61768	Kinesin-1 heavy chain OS=Mus musculus GN=Kif5b PE=1 SV=3	95.4217	1.66326	4	0
Q61820	GTP-binding nuclear protein Ran, testis-specific isoform OS=Mus musculus GN=Rasl2-9 PE=2 SV=1	96.886	0.594713	2	0
Q61990	Poly(rC)-binding protein 2 OS=Mus musculus GN=Pcbp2 PE=1 SV=1	97.0479	2.22354	5	0
Q62000	Mimecan OS=Mus musculus GN=Ogn PE=2 SV=1	90.4082	12.5964	5	0
Q62048	Astrocytic phosphoprotein PEA-15 OS=Mus musculus GN=Pea15 PE=1 SV=1	94.881	2.80642	4	0
Q62086	Serum paraoxonase/arylesterase 2 OS=Mus musculus GN=Pon2 PE=1 SV=2	96.4963	1.13241	2	0
Q62087	Serum paraoxonase/lactonase 3 OS=Mus musculus GN=Pon3 PE=1 SV=2	95.2229	4.16554	3	0
Q62093	Serine/arginine-rich splicing factor 2 OS=Mus musculus GN=Srsf2 PE=1 SV=4	97.5562	1.87723	2	0
Q62095	ATP-dependent RNA helicase DDX3Y OS=Mus musculus GN=Ddx3y PE=1 SV=2	97.464	2.06742	11	0
Q62148	Retinal dehydrogenase 2 OS=Mus musculus GN=Aldh1a2 PE=2 SV=2	97.5123	3.3021	2	0
Q62159	Rho-related GTP-binding protein RhoC OS=Mus musculus GN=Rhoc PE=1 SV=2	98.009	2.98976	6	0
Q62181	Semaphorin-3C OS=Mus musculus GN=Sema3c PE=1 SV=2	79.1459	41.3093	5	0
Q62189	U1 small nuclear ribonucleoprotein A OS=Mus musculus GN=Snrpa PE=2 SV=3	98.8263	0.862951	5	0
Q62203	Splicing factor 3A subunit 2 OS=Mus musculus GN=Sf3a2 PE=1 SV=2	74.2981	43.8371	4	0
Q62234	Myomesin-1 OS=Mus musculus GN=Myom1 PE=1 SV=2	66.5152	49.5174	3	0
Q62241	U1 small nuclear ribonucleoprotein C OS=Mus musculus GN=Snrpc PE=2 SV=1	98.5183	NA	1	0
Q62261	Spectrin beta chain, non-erythrocytic 1 OS=Mus musculus GN=Sptbn1 PE=1 SV=2	96.7726	6.97119	45	0
Q62318	Transcription intermediary factor 1-beta OS=Mus musculus GN=Trim28 PE=1 SV=3	89.6593	18.8499	12	0
Q62351	Transferrin receptor protein 1 OS=Mus musculus GN=Tfrc PE=1 SV=1	96.1116	6.2758	8	0
Q62376	U1 small nuclear ribonucleoprotein 70 kDa OS=Mus musculus GN=Snrnp70 PE=1 SV=2	97.6146	2.70199	9	0
Q62417	Sorbin and SH3 domain-containing protein 1 OS=Mus musculus GN=Sorbs1 PE=1 SV=2	97.3483	3.10518	5	0
Q62425	Cytochrome c oxidase subunit NDUFA4 OS=Mus musculus GN=Ndufa4 PE=1 SV=2	99.1259	0.592514	4	0
Q62446	Peptidyl-prolyl cis-trans isomerase FKBP3 OS=Mus musculus GN=Fkbp3 PE=1 SV=2	99.5243	NA	1	0
Q62448	Eukaryotic translation initiation factor 4 gamma 2 OS=Mus musculus GN=Eif4g2 PE=1 SV=2	98.6238	1.79606	8	0
Q62470	Integrin alpha-3 OS=Mus musculus GN=Itga3 PE=1 SV=1	96.8319	1.9798	5	0
Q63829	COMM domain-containing protein 3 OS=Mus musculus GN=Commd3 PE=2 SV=1	97.6124	NA	1	0
Q63886	UDP-glucuronosyltransferase 1-1 OS=Mus musculus GN=Ugt1a1 PE=2 SV=2	96.2662	2.68405	3	0
Q63918	Serum deprivation-response protein OS=Mus musculus GN=Sdpr PE=1 SV=3	99.4375	0.386085	3	0
Q640M1	U3 small nucleolar RNA-associated protein 14 homolog A OS=Mus musculus GN=Utp14a PE=1 SV=1	91.3084	NA	1	0
Q640N1	Adipocyte enhancer-binding protein 1 OS=Mus musculus GN=Aebp1 PE=1 SV=1	95.1268	9.04462	5	0
Q64151	Semaphorin-4C OS=Mus musculus GN=Sema4c PE=1 SV=1	97.5068	NA	1	0
Q64152	Transcription factor BTF3 OS=Mus musculus GN=Btf3 PE=1 SV=3	99.227	NA	1	0
Q641P0	Actin-related protein 3B OS=Mus musculus GN=Actr3b PE=2 SV=1	97.4166	1.77	4	0
Q64337	Sequestosome-1 OS=Mus musculus GN=Sqstm1 PE=1 SV=1	99.1902	0.451505	2	0
Q64433	10 kDa heat shock protein, mitochondrial OS=Mus musculus GN=Hspe1 PE=1 SV=2	97.3807	3.91571	12	0
Q64435	UDP-glucuronosyltransferase 1-6 OS=Mus musculus GN=Ugt1a6 PE=1 SV=1	96.2662	2.68405	3	0
Q64449	C-type mannose receptor 2 OS=Mus musculus GN=Mrc2 PE=1 SV=3	96.7566	2.64717	4	0
Q64475	Histone H2B type 1-B OS=Mus musculus GN=Hist1h2bb PE=1 SV=3	97.5908	2.06985	8	0
Q64511	DNA topoisomerase 2-beta OS=Mus musculus GN=Top2b PE=1 SV=2	97.6911	3.76	30	0
Q64521	Glycerol-3-phosphate dehydrogenase, mitochondrial OS=Mus musculus GN=Gpd2 PE=1 SV=2	91.9823	19.5122	37	0
Q64522	Histone H2A type 2-B OS=Mus musculus GN=Hist2h2ab PE=1 SV=3	97.4268	3.90918	20	0
Q64727	Vinculin OS=Mus musculus GN=Vcl PE=1 SV=4	95.9907	6.20468	27	0
Q64737	Trifunctional purine biosynthetic protein adenosine-3 OS=Mus musculus GN=Gart PE=2 SV=3	68.0384	40.602	2	0
Q65Z40	Wings apart-like protein homolog OS=Mus musculus GN=Wapal PE=1 SV=2	66.7406	54.4196	3	0
Q66GT5	Phosphatidylglycerophosphatase and protein-tyrosine phosphatase 1 OS=Mus musculus GN=Ptpmt1 PE=1 SV=1	93.8092	7.15162	5	0
Q68FL6	Methionine--tRNA ligase, cytoplasmic OS=Mus musculus GN=Mars PE=2 SV=1	75.6672	37.9859	5	0
Q69ZN7	Myoferlin OS=Mus musculus GN=Myof PE=1 SV=2	94.0207	17.8004	80	0
Q6A026	Sister chromatid cohesion protein PDS5 homolog A OS=Mus musculus GN=Pds5a PE=1 SV=3	97.8144	3.46193	3	0
Q6A068	Cell division cycle 5-like protein OS=Mus musculus GN=Cdc5l PE=1 SV=2	96.2299	2.52335	8	0
Q6A0A9	Constitutive coactivator of PPAR-gamma-like protein 1 OS=Mus musculus GN=FAM120A PE=1 SV=2	97.9786	1.49229	10	0
Q6DFW4	Nucleolar protein 58 OS=Mus musculus GN=Nop58 PE=1 SV=1	97.6668	2.65055	12	0
Q6DFX2	Anthrax toxin receptor 2 OS=Mus musculus GN=Antxr2 PE=2 SV=1	99.3239	0.596418	2	0
Q6DID3	Protein SCAF8 OS=Mus musculus GN=Scaf8 PE=1 SV=1	97.8044	1.97225	5	0
Q6DVA0	LEM domain-containing protein 2 OS=Mus musculus GN=Lemd2 PE=1 SV=1	98.0756	0.973394	6	0
Q6DYE8	Ectonucleotide pyrophosphatase/phosphodiesterase family member 3 OS=Mus musculus GN=Enpp3 PE=1 SV=2	99.279	0.243234	2	0
Q6GQT9	Nodal modulator 1 OS=Mus musculus GN=Nomo1 PE=1 SV=1	97.695	3.25886	21	0
Q6GU68	Immunoglobulin superfamily containing leucine-rich repeat protein OS=Mus musculus GN=Islr PE=1 SV=1	50.4618	68.4041	2	0
Q6IRU2	Tropomyosin alpha-4 chain OS=Mus musculus GN=Tpm4 PE=2 SV=3	98.3522	1.3333	11	0
Q6KCD5	Nipped-B-like protein OS=Mus musculus GN=Nipbl PE=1 SV=1	63.6353	47.4083	5	0
Q6NS46	Protein RRP5 homolog OS=Mus musculus GN=Pdcd11 PE=2 SV=2	87.0888	31.2306	9	0
Q6NSU3	Glycosyltransferase 8 domain-containing protein 1 OS=Mus musculus GN=Glt8d1 PE=2 SV=1	96.3373	3.80113	6	0
Q6NV83	U2 snRNP-associated SURP motif-containing protein OS=Mus musculus GN=U2surp PE=2 SV=3	60.526	33.486	3	0
Q6NWW9	Fibronectin type III domain-containing protein 3B OS=Mus musculus GN=Fndc3b PE=1 SV=1	95.5313	4.07641	4	0
Q6P069	Sorcin OS=Mus musculus GN=Sri PE=1 SV=1	97.3238	2.21182	3	0
Q6P4T2	U5 small nuclear ribonucleoprotein 200 kDa helicase OS=Mus musculus GN=Snrnp200 PE=1 SV=1	95.1947	14.2416	48	0
Q6P542	ATP-binding cassette sub-family F member 1 OS=Mus musculus GN=Abcf1 PE=1 SV=1	97.1559	0.922384	2	0
Q6P5B0	RRP12-like protein OS=Mus musculus GN=Rrp12 PE=1 SV=1	98.4662	1.56731	5	0
Q6P5D8	Structural maintenance of chromosomes flexible hinge domain-containing protein 1 OS=Mus musculus GN=Smchd1 PE=1 SV=2	91.1609	17.018	18	0
Q6P5E4	UDP-glucose:glycoprotein glucosyltransferase 1 OS=Mus musculus GN=Uggt1 PE=1 SV=4	95.4655	11.1326	37	0
Q6P5F9	Exportin-1 OS=Mus musculus GN=Xpo1 PE=1 SV=1	98.7631	0.561425	2	0
Q6P5H2	Nestin OS=Mus musculus GN=Nes PE=1 SV=1	93.9434	17.9715	25	0
Q6P8X1	Sorting nexin-6 OS=Mus musculus GN=Snx6 PE=1 SV=2	98.734	0.244707	2	0
Q6P9J9	Anoctamin-6 OS=Mus musculus GN=Ano6 PE=1 SV=1	98.7669	0.84136	6	0
Q6P9R1	ATP-dependent RNA helicase DDX51 OS=Mus musculus GN=Ddx51 PE=2 SV=1	96.3846	NA	1	0
Q6P9Z1	SWI/SNF-related matrix-associated actin-dependent regulator of chromatin subfamily D member 3 OS=Mus musculus GN=Smarcd3 PE=1 SV=2	84.279	31.6191	6	0
Q6PA06	Atlastin-2 OS=Mus musculus GN=Atl2 PE=1 SV=1	67.3588	56.0329	3	0
Q6PAL7	AT-hook DNA-binding motif-containing protein 1 OS=Mus musculus GN=Ahdc1 PE=1 SV=1	99.2595	NA	1	0
Q6PB66	Leucine-rich PPR motif-containing protein, mitochondrial OS=Mus musculus GN=Lrpprc PE=1 SV=2	94.8637	14.2575	47	0
Q6PCP5	Mitochondrial fission factor OS=Mus musculus GN=Mff PE=1 SV=1	48.2263	68.1179	2	0
Q6PDG5	SWI/SNF complex subunit SMARCC2 OS=Mus musculus GN=Smarcc2 PE=1 SV=2	94.5755	4.31125	16	0
Q6PDI5	Proteasome-associated protein ECM29 homolog OS=Mus musculus GN=Ecm29 PE=1 SV=3	95.9308	3.31058	5	0
Q6PDL0	Cytoplasmic dynein 1 light intermediate chain 2 OS=Mus musculus GN=Dync1li2 PE=1 SV=2	76.8321	31.4278	3	0
Q6PDM2	Serine/arginine-rich splicing factor 1 OS=Mus musculus GN=Srsf1 PE=1 SV=3	98.5135	1.28352	9	0
Q6PE01	U5 small nuclear ribonucleoprotein 40 kDa protein OS=Mus musculus GN=Snrnp40 PE=2 SV=1	96.3555	2.34743	8	0
Q6PFD9	Nuclear pore complex protein Nup98-Nup96 OS=Mus musculus GN=Nup98 PE=1 SV=2	88.2269	16.2308	5	0
Q6PFR5	Transformer-2 protein homolog alpha OS=Mus musculus GN=Tra2a PE=1 SV=1	65.7288	55.437	3	0
Q6PGB8	Probable global transcription activator SNF2L1 OS=Mus musculus GN=Smarca1 PE=1 SV=1	99.4975	NA	1	0
Q6PGC1	ATP-dependent RNA helicase Dhx29 OS=Mus musculus GN=Dhx29 PE=2 SV=1	81.8069	39.8448	6	0
Q6PIC6	Sodium/potassium-transporting ATPase subunit alpha-3 OS=Mus musculus GN=Atp1a3 PE=1 SV=1	98.9185	0.581265	8	0
Q6URW6	Myosin-14 OS=Mus musculus GN=Myh14 PE=1 SV=1	96.6149	3.56832	3	0
Q6ZPE2	Myotubularin-related protein 5 OS=Mus musculus GN=Sbf1 PE=1 SV=2	99.0374	NA	1	0
Q6ZPR5	Sphingomyelin phosphodiesterase 4 OS=Mus musculus GN=Smpd4 PE=2 SV=2	78.784	35.3195	6	0
Q6ZQ38	Cullin-associated NEDD8-dissociated protein 1 OS=Mus musculus GN=Cand1 PE=2 SV=2	95.7623	2.35366	6	0
Q6ZQ58	La-related protein 1 OS=Mus musculus GN=Larp1 PE=1 SV=3	98.5814	1.36121	7	0
Q6ZQI3	Malectin OS=Mus musculus GN=Mlec PE=2 SV=2	95.359	4.4333	6	0
Q6ZQL4	WD repeat-containing protein 43 OS=Mus musculus GN=Wdr43 PE=2 SV=2	99.8781	NA	1	0
Q6ZWN5	40S ribosomal protein S9 OS=Mus musculus GN=Rps9 PE=1 SV=3	98.0352	2.16296	11	0
Q6ZWQ7	Signal peptidase complex subunit 3 OS=Mus musculus GN=Spcs3 PE=2 SV=1	96.3696	3.8111	5	0
Q6ZWR6	Nesprin-1 OS=Mus musculus GN=Syne1 PE=1 SV=2	97.3623	1.9361	2	0
Q6ZWU9	40S ribosomal protein S27 OS=Mus musculus GN=Rps27 PE=1 SV=3	98.2947	1.16115	3	0
Q6ZWV7	60S ribosomal protein L35 OS=Mus musculus GN=Rpl35 PE=2 SV=1	97.2858	0.721771	3	0
Q6ZWX6	Eukaryotic translation initiation factor 2 subunit 1 OS=Mus musculus GN=Eif2s1 PE=1 SV=3	94.7785	2.87609	3	0
Q71LX4	Talin-2 OS=Mus musculus GN=Tln2 PE=1 SV=3	95.2737	4.69072	18	0
Q78IK2	Up-regulated during skeletal muscle growth protein 5 OS=Mus musculus GN=Usmg5 PE=1 SV=1	98.8736	1.24654	3	0
Q78IK4	MICOS complex subunit Mic27 OS=Mus musculus GN=Apool PE=2 SV=1	98.0426	2.1301	15	0
Q791T5	Mitochondrial carrier homolog 1 OS=Mus musculus GN=Mtch1 PE=2 SV=1	98.5859	0.379538	7	0
Q791V5	Mitochondrial carrier homolog 2 OS=Mus musculus GN=Mtch2 PE=1 SV=1	97.9584	2.81703	9	0
Q7TMB8	Cytoplasmic FMR1-interacting protein 1 OS=Mus musculus GN=Cyfip1 PE=1 SV=1	98.1496	1.67711	4	0
Q7TMF3	NADH dehydrogenase [ubiquinone] 1 alpha subcomplex subunit 12 OS=Mus musculus GN=Ndufa12 PE=2 SV=2	97.1244	3.23386	8	0
Q7TMK9	Heterogeneous nuclear ribonucleoprotein Q OS=Mus musculus GN=Syncrip PE=1 SV=2	97.3164	3.58466	10	0
Q7TMM9	Tubulin beta-2A chain OS=Mus musculus GN=Tubb2a PE=1 SV=1	94.9938	12.0726	39	0
Q7TMV3	FAST kinase domain-containing protein 5 OS=Mus musculus GN=Fastkd5 PE=2 SV=1	97.0372	0.371529	2	0
Q7TMY7	Importin-8 OS=Mus musculus GN=Ipo8 PE=1 SV=3	96.2592	4.89124	2	0
Q7TNV0	Protein DEK OS=Mus musculus GN=Dek PE=1 SV=1	99.1489	0.971991	4	0
Q7TPD0	Integrator complex subunit 3 OS=Mus musculus GN=Ints3 PE=2 SV=2	98.529	1.1614	2	0
Q7TPR4	Alpha-actinin-1 OS=Mus musculus GN=Actn1 PE=1 SV=1	97.3515	5.18322	26	0
Q7TPV4	Myb-binding protein 1A OS=Mus musculus GN=Mybbp1a PE=1 SV=2	97.6919	2.26633	29	0
Q7TPW1	Nexilin OS=Mus musculus GN=Nexn PE=2 SV=3	98.3555	NA	1	0
Q7TQ48	Sarcalumenin OS=Mus musculus GN=Srl PE=1 SV=1	95.5959	9.10254	16	0
Q7TQ95	Protein lunapark OS=Mus musculus GN=Lnp PE=1 SV=1	89.8099	14.0476	5	0
Q7TQI3	Ubiquitin thioesterase OTUB1 OS=Mus musculus GN=Otub1 PE=1 SV=2	79.8567	32.9167	3	0
Q7TSQ8	Pyruvate dehydrogenase phosphatase regulatory subunit, mitochondrial OS=Mus musculus GN=Pdpr PE=2 SV=1	96.8469	1.60405	5	0
Q80SY5	Pre-mRNA-splicing factor 38B OS=Mus musculus GN=Prpf38b PE=1 SV=1	96.8537	4.60966	3	0
Q80TM9	Nischarin OS=Mus musculus GN=Nisch PE=1 SV=2	98.9289	0.583379	2	0
Q80U35	Rho guanine nucleotide exchange factor 17 OS=Mus musculus GN=Arhgef17 PE=2 SV=2	95.4421	1.58173	2	0
Q80U93	Nuclear pore complex protein Nup214 OS=Mus musculus GN=Nup214 PE=1 SV=2	96.8008	1.94025	3	0
Q80U95	Ubiquitin-protein ligase E3C OS=Mus musculus GN=Ube3c PE=2 SV=2	98.9012	0.493174	3	0
Q80UG5	Septin-9 OS=Mus musculus GN=Sept9 PE=1 SV=1	96.323	3.36791	7	0
Q80UU9	Membrane-associated progesterone receptor component 2 OS=Mus musculus GN=Pgrmc2 PE=1 SV=2	87.2404	29.1169	10	0
Q80V26	Inositol monophosphatase 3 OS=Mus musculus GN=Impad1 PE=1 SV=1	98.7523	1.12531	2	0
Q80VD1	Protein FAM98B OS=Mus musculus GN=Fam98b PE=2 SV=1	96.0056	3.00113	2	0
Q80VI1	E3 ubiquitin-protein ligase TRIM56 OS=Mus musculus GN=Trim56 PE=1 SV=1	97.0068	1.62603	2	0
Q80W00	Serine/threonine-protein phosphatase 1 regulatory subunit 10 OS=Mus musculus GN=Ppp1r10 PE=1 SV=1	99.5996	NA	1	0
Q80W54	CAAX prenyl protease 1 homolog OS=Mus musculus GN=Zmpste24 PE=1 SV=2	87.586	24.6469	10	0
Q80WJ7	Protein LYRIC OS=Mus musculus GN=Mtdh PE=1 SV=1	97.9966	0.866874	10	0
Q80WS3	rRNA/tRNA 2'-O-methyltransferase fibrillarin-like protein 1 OS=Mus musculus GN=Fbll1 PE=2 SV=1	95.915	4.34863	3	0
Q80X82	Symplekin OS=Mus musculus GN=Sympk PE=1 SV=1	96.8108	3.01185	8	0
Q80X85	28S ribosomal protein S7, mitochondrial OS=Mus musculus GN=Mrps7 PE=2 SV=1	97.5758	2.02399	2	0
Q80X90	Filamin-B OS=Mus musculus GN=Flnb PE=1 SV=3	93.7435	10.4141	25	0
Q80X95	Ras-related GTP-binding protein A OS=Mus musculus GN=Rraga PE=2 SV=1	96.2275	3.34054	3	0
Q80Y14	Glutaredoxin-related protein 5, mitochondrial OS=Mus musculus GN=Glrx5 PE=1 SV=2	53.5875	62.5943	2	0
Q80YD1	ATP-dependent RNA helicase SUPV3L1, mitochondrial OS=Mus musculus GN=Supv3l1 PE=2 SV=1	86.1652	30.9197	8	0
Q80ZJ1	Ras-related protein Rap-2a OS=Mus musculus GN=Rap2a PE=1 SV=2	99.7815	NA	1	0
Q80ZS3	28S ribosomal protein S26, mitochondrial OS=Mus musculus GN=Mrps26 PE=1 SV=1	96.143	3.28811	8	0
Q810S1	Calcium uniporter regulatory subunit MCUb, mitochondrial OS=Mus musculus GN=Ccdc109b PE=1 SV=1	98.5365	1.2943	8	0
Q811Q9	Choline-phosphate cytidylyltransferase B OS=Mus musculus GN=Pcyt1b PE=1 SV=2	95.2142	3.97535	3	0
Q811U4	Mitofusin-1 OS=Mus musculus GN=Mfn1 PE=1 SV=3	97.6806	3.84585	4	0
Q8BFP9	[Pyruvate dehydrogenase (acetyl-transferring)] kinase isozyme 1, mitochondrial OS=Mus musculus GN=Pdk1 PE=1 SV=2	75.9597	44.7201	4	0
Q8BFQ4	WD repeat-containing protein 82 OS=Mus musculus GN=Wdr82 PE=1 SV=1	91.5399	NA	1	0
Q8BFR4	N-acetylglucosamine-6-sulfatase OS=Mus musculus GN=Gns PE=2 SV=1	94.7032	0.405927	3	0
Q8BFR5	Elongation factor Tu, mitochondrial OS=Mus musculus GN=Tufm PE=1 SV=1	97.604	2.63416	15	0
Q8BFY6	Peflin OS=Mus musculus GN=Pef1 PE=2 SV=1	98.2946	NA	1	0
Q8BFY9	Transportin-1 OS=Mus musculus GN=Tnpo1 PE=1 SV=2	93.5773	8.63432	6	0
Q8BFZ3	Beta-actin-like protein 2 OS=Mus musculus GN=Actbl2 PE=1 SV=1	89.924	25.6722	27	0
Q8BFZ9	Erlin-2 OS=Mus musculus GN=Erlin2 PE=1 SV=1	96.5165	3.11957	8	0
Q8BG51	Mitochondrial Rho GTPase 1 OS=Mus musculus GN=Rhot1 PE=2 SV=1	84.2501	36.084	7	0
Q8BG67	Protein EFR3 homolog A OS=Mus musculus GN=Efr3a PE=1 SV=1	50.7921	64.18	2	0
Q8BGC0	HIV Tat-specific factor 1 homolog OS=Mus musculus GN=Htatsf1 PE=1 SV=1	96.8278	2.47102	5	0
Q8BGC4	Zinc-binding alcohol dehydrogenase domain-containing protein 2 OS=Mus musculus GN=Zadh2 PE=1 SV=1	93.2398	8.67187	8	0
Q8BGH2	Sorting and assembly machinery component 50 homolog OS=Mus musculus GN=Samm50 PE=1 SV=1	94.8902	6.07547	10	0
Q8BGP6	Solute carrier family 25 member 40 OS=Mus musculus GN=Slc25a40 PE=2 SV=1	99.6969	NA	1	0
Q8BGS0	Protein MAK16 homolog OS=Mus musculus GN=Mak16 PE=1 SV=1	87.2627	17.8403	4	0
Q8BGT5	Alanine aminotransferase 2 OS=Mus musculus GN=Gpt2 PE=1 SV=1	96.4129	2.9192	7	0
Q8BGX2	Uncharacterized protein C19orf52 homolog OS=Mus musculus PE=2 SV=1	52.8138	66.3647	2	0
Q8BH04	Phosphoenolpyruvate carboxykinase [GTP], mitochondrial OS=Mus musculus GN=Pck2 PE=1 SV=1	97.1882	1.67271	26	0
Q8BH24	Transmembrane 9 superfamily member 4 OS=Mus musculus GN=Tm9sf4 PE=2 SV=1	97.0967	2.5482	4	0
Q8BH55	Threonine synthase-like 1 OS=Mus musculus GN=Thnsl1 PE=2 SV=1	95.4444	NA	1	0
Q8BH59	Calcium-binding mitochondrial carrier protein Aralar1 OS=Mus musculus GN=Slc25a12 PE=1 SV=1	97.0067	4.83375	22	0
Q8BH64	EH domain-containing protein 2 OS=Mus musculus GN=Ehd2 PE=1 SV=1	97.2655	2.42241	10	0
Q8BH79	Anoctamin-10 OS=Mus musculus GN=Ano10 PE=2 SV=1	98.5008	NA	1	0
Q8BH86	UPF0317 protein C14orf159 homolog, mitochondrial OS=Mus musculus PE=1 SV=1	84.4697	35.5012	7	0
Q8BH95	Enoyl-CoA hydratase, mitochondrial OS=Mus musculus GN=Echs1 PE=1 SV=1	97.9766	1.35598	10	0
Q8BHC4	Dephospho-CoA kinase domain-containing protein OS=Mus musculus GN=Dcakd PE=2 SV=1	97.3703	2.22113	8	0
Q8BHC9	Alpha-(1,3)-fucosyltransferase 11 OS=Mus musculus GN=Fut11 PE=1 SV=1	97.3626	3.37294	2	0
Q8BHF7	CDP-diacylglycerol--glycerol-3-phosphate 3-phosphatidyltransferase, mitochondrial OS=Mus musculus GN=Pgs1 PE=2 SV=1	96.7689	3.07602	6	0
Q8BHN3	Neutral alpha-glucosidase AB OS=Mus musculus GN=Ganab PE=1 SV=1	97.8696	2.05532	28	0
Q8BHS6	Armadillo repeat-containing X-linked protein 3 OS=Mus musculus GN=Armcx3 PE=1 SV=1	95.1348	NA	1	0
Q8BI84	Melanoma inhibitory activity protein 3 OS=Mus musculus GN=Mia3 PE=1 SV=2	97.8665	3.45812	7	0
Q8BIG7	Catechol O-methyltransferase domain-containing protein 1 OS=Mus musculus GN=Comtd1 PE=2 SV=1	97.9794	2.19053	3	0
Q8BIJ6	Isoleucine--tRNA ligase, mitochondrial OS=Mus musculus GN=Iars2 PE=1 SV=1	95.086	10.2026	20	0
Q8BIP0	Aspartate--tRNA ligase, mitochondrial OS=Mus musculus GN=Dars2 PE=2 SV=1	98.2004	1.67167	4	0
Q8BJ03	Cytochrome c oxidase assembly protein COX15 homolog OS=Mus musculus GN=Cox15 PE=2 SV=1	92.912	1.80406	2	0
Q8BJ71	Nuclear pore complex protein Nup93 OS=Mus musculus GN=Nup93 PE=2 SV=1	97.5559	1.59824	10	0
Q8BJS4	SUN domain-containing protein 2 OS=Mus musculus GN=Sun2 PE=1 SV=3	93.8663	19.9863	23	0
Q8BJW6	Eukaryotic translation initiation factor 2A OS=Mus musculus GN=Eif2a PE=2 SV=2	79.2387	NA	1	0
Q8BJZ4	28S ribosomal protein S35, mitochondrial OS=Mus musculus GN=Mrps35 PE=2 SV=2	89.8966	15.6765	4	0
Q8BK08	Transmembrane protein 11, mitochondrial OS=Mus musculus GN=Tmem11 PE=2 SV=1	97.4792	NA	1	0
Q8BK30	NADH dehydrogenase [ubiquinone] flavoprotein 3, mitochondrial OS=Mus musculus GN=Ndufv3 PE=2 SV=1	97.7909	NA	1	0
Q8BK64	Activator of 90 kDa heat shock protein ATPase homolog 1 OS=Mus musculus GN=Ahsa1 PE=2 SV=2	96.37	1.01586	2	0
Q8BK67	Protein RCC2 OS=Mus musculus GN=Rcc2 PE=1 SV=1	97.6867	0.894601	5	0
Q8BK72	28S ribosomal protein S27, mitochondrial OS=Mus musculus GN=Mrps27 PE=2 SV=2	92.1348	11.2612	7	0
Q8BKE6	Cytochrome P450 20A1 OS=Mus musculus GN=Cyp20a1 PE=2 SV=1	97.5265	2.8695	7	0
Q8BKS9	Pumilio domain-containing protein KIAA0020 OS=Mus musculus GN=Kiaa0020 PE=1 SV=2	75.8213	44.8374	4	0
Q8BKT7	THO complex subunit 5 homolog OS=Mus musculus GN=Thoc5 PE=1 SV=2	95.7728	4.43284	5	0
Q8BKZ9	Pyruvate dehydrogenase protein X component, mitochondrial OS=Mus musculus GN=Pdhx PE=1 SV=1	96.2136	4.78164	9	0
Q8BL97	Serine/arginine-rich splicing factor 7 OS=Mus musculus GN=Srsf7 PE=1 SV=1	98.398	1.06421	7	0
Q8BLF1	Neutral cholesterol ester hydrolase 1 OS=Mus musculus GN=Nceh1 PE=1 SV=1	98.8858	0.678864	5	0
Q8BLN5	Lanosterol synthase OS=Mus musculus GN=Lss PE=2 SV=2	96.9035	0.539155	2	0
Q8BM55	Transmembrane protein 214 OS=Mus musculus GN=Tmem214 PE=2 SV=1	97.4413	2.14555	6	0
Q8BM72	Heat shock 70 kDa protein 13 OS=Mus musculus GN=Hspa13 PE=2 SV=1	93.6825	3.14361	3	0
Q8BMA6	Signal recognition particle subunit SRP68 OS=Mus musculus GN=Srp68 PE=2 SV=2	59.806	52.3028	5	0
Q8BMD8	Calcium-binding mitochondrial carrier protein SCaMC-1 OS=Mus musculus GN=Slc25a24 PE=1 SV=1	98.159	1.0218	19	0
Q8BMF3	NADP-dependent malic enzyme, mitochondrial OS=Mus musculus GN=Me3 PE=1 SV=2	93.4693	NA	1	0
Q8BMF4	Dihydrolipoyllysine-residue acetyltransferase component of pyruvate dehydrogenase complex, mitochondrial OS=Mus musculus GN=Dlat PE=1 SV=2	97.4592	2.60079	15	0
Q8BMJ2	Leucine--tRNA ligase, cytoplasmic OS=Mus musculus GN=Lars PE=1 SV=2	95.1791	2.91598	5	0
Q8BMK4	Cytoskeleton-associated protein 4 OS=Mus musculus GN=Ckap4 PE=1 SV=2	97.8165	2.01852	31	0
Q8BMP6	Golgi resident protein GCP60 OS=Mus musculus GN=Acbd3 PE=1 SV=3	98.2116	NA	1	0
Q8BMS1	Trifunctional enzyme subunit alpha, mitochondrial OS=Mus musculus GN=Hadha PE=1 SV=1	97.9156	2.61045	33	0
Q8BN21	Serine/threonine-protein kinase VRK2 OS=Mus musculus GN=Vrk2 PE=1 SV=2	99.4065	NA	1	0
Q8BP40	Lysophosphatidic acid phosphatase type 6 OS=Mus musculus GN=Acp6 PE=2 SV=1	96.0046	4.25294	2	0
Q8BP67	60S ribosomal protein L24 OS=Mus musculus GN=Rpl24 PE=1 SV=2	97.8623	0.521473	3	0
Q8BP92	Reticulocalbin-2 OS=Mus musculus GN=Rcn2 PE=2 SV=1	97.3272	2.00085	9	0
Q8BQ47	Protein canopy homolog 4 OS=Mus musculus GN=Cnpy4 PE=1 SV=1	97.353	NA	1	0
Q8BR63	Protein FAM177A1 OS=Mus musculus GN=Fam177a1 PE=2 SV=1	98.8832	0.347081	2	0
Q8BRF7	Sec1 family domain-containing protein 1 OS=Mus musculus GN=Scfd1 PE=1 SV=1	95.7401	2.56329	4	0
Q8BRH0	Transmembrane and TPR repeat-containing protein 3 OS=Mus musculus GN=Tmtc3 PE=2 SV=2	95.7214	3.11757	5	0
Q8BSL7	ADP-ribosylation factor 2 OS=Mus musculus GN=Arf2 PE=1 SV=2	89.4182	15.4739	7	0
Q8BT60	Copine-3 OS=Mus musculus GN=Cpne3 PE=2 SV=2	94.6298	NA	1	0
Q8BTI8	Serine/arginine repetitive matrix protein 2 OS=Mus musculus GN=Srrm2 PE=1 SV=3	94.4987	5.15126	2	0
Q8BTM8	Filamin-A OS=Mus musculus GN=Flna PE=1 SV=5	95.5466	8.2118	38	0
Q8BTS4	Nuclear pore complex protein Nup54 OS=Mus musculus GN=Nup54 PE=1 SV=1	97.8914	NA	1	0
Q8BTV2	Cleavage and polyadenylation specificity factor subunit 7 OS=Mus musculus GN=Cpsf7 PE=1 SV=2	97.5648	3.1114	4	0
Q8BTW3	Exosome complex component MTR3 OS=Mus musculus GN=Exosc6 PE=1 SV=1	93.7567	NA	1	0
Q8BTX9	Inactive hydroxysteroid dehydrogenase-like protein 1 OS=Mus musculus GN=Hsdl1 PE=2 SV=1	97.0332	2.65145	2	0
Q8BU14	Translocation protein SEC62 OS=Mus musculus GN=Sec62 PE=1 SV=1	99.2571	0.109372	2	0
Q8BU21	Glutaminyl-tRNA synthetase, isoform CRA_a OS=Mus musculus GN=Qars PE=2 SV=1	98.2989	2.02124	5	0
Q8BU30	Isoleucine--tRNA ligase, cytoplasmic OS=Mus musculus GN=Iars PE=2 SV=2	97.4266	2.51302	7	0
Q8BU33	Acetolactate synthase-like protein OS=Mus musculus GN=Ilvbl PE=2 SV=1	96.7696	1.94225	7	0
Q8BU88	39S ribosomal protein L22, mitochondrial OS=Mus musculus GN=Mrpl22 PE=2 SV=1	95.4619	2.17971	4	0
Q8BVA5	UPF0554 protein C2orf43 homolog OS=Mus musculus PE=2 SV=1	76.2809	44.9137	4	0
Q8BWM0	Prostaglandin E synthase 2 OS=Mus musculus GN=Ptges2 PE=1 SV=3	97.4233	2.5184	4	0
Q8BWT1	3-ketoacyl-CoA thiolase, mitochondrial OS=Mus musculus GN=Acaa2 PE=1 SV=3	98.0183	1.87616	25	0
Q8BX02	KN motif and ankyrin repeat domain-containing protein 2 OS=Mus musculus GN=Kank2 PE=1 SV=1	95.9094	3.25995	10	0
Q8BX10	Serine/threonine-protein phosphatase PGAM5, mitochondrial OS=Mus musculus GN=Pgam5 PE=2 SV=1	97.341	4.00347	5	0
Q8BXA1	Golgi integral membrane protein 4 OS=Mus musculus GN=Golim4 PE=1 SV=1	93.6657	2.73491	6	0
Q8BXZ1	Protein disulfide-isomerase TMX3 OS=Mus musculus GN=Tmx3 PE=1 SV=2	98.017	1.50397	10	0
Q8BYB9	Protein O-glucosyltransferase 1 OS=Mus musculus GN=Poglut1 PE=1 SV=2	88.7112	22.5034	5	0
Q8BYL4	Tyrosine--tRNA ligase, mitochondrial OS=Mus musculus GN=Yars2 PE=1 SV=2	78.7412	40.3616	5	0
Q8BYU6	Torsin-1A-interacting protein 2 OS=Mus musculus GN=Tor1aip2 PE=1 SV=1	84.5271	27.8312	4	0
Q8C0C7	Phenylalanine--tRNA ligase alpha subunit OS=Mus musculus GN=Farsa PE=2 SV=1	99.3177	NA	1	0
Q8C0I1	Alkyldihydroxyacetonephosphate synthase, peroxisomal OS=Mus musculus GN=Agps PE=1 SV=1	97.1922	4.26017	19	0
Q8C0L0	Thioredoxin-related transmembrane protein 4 OS=Mus musculus GN=Tmx4 PE=2 SV=2	97.2255	2.43176	8	0
Q8C0Z1	Protein ITFG3 OS=Mus musculus GN=Itfg3 PE=1 SV=1	98.733	0.219887	2	0
Q8C129	Leucyl-cystinyl aminopeptidase OS=Mus musculus GN=Lnpep PE=1 SV=1	98.1259	1.6609	12	0
Q8C1B7	Septin-11 OS=Mus musculus GN=Sept11 PE=1 SV=4	49.4576	62.8564	2	0
Q8C2E7	WASH complex subunit strumpellin OS=Mus musculus GN=Kiaa0196 PE=2 SV=2	84.791	20.4713	2	0
Q8C2Q3	RNA-binding protein 14 OS=Mus musculus GN=Rbm14 PE=1 SV=1	98.4725	0.14069	3	0
Q8C3X2	Coiled-coil domain-containing protein 90B, mitochondrial OS=Mus musculus GN=Ccdc90b PE=2 SV=1	98.1844	1.18807	8	0
Q8C3X8	Lipase maturation factor 2 OS=Mus musculus GN=Lmf2 PE=2 SV=1	88.8616	27.8581	12	0
Q8C4J7	Transducin beta-like protein 3 OS=Mus musculus GN=Tbl3 PE=2 SV=1	84.993	15.6447	4	0
Q8C522	Endonuclease domain-containing 1 protein OS=Mus musculus GN=Endod1 PE=1 SV=2	98.2251	2.06601	2	0
Q8C5Q4	G-rich sequence factor 1 OS=Mus musculus GN=Grsf1 PE=1 SV=2	83.4826	38.5715	6	0
Q8C6I2	Succinate dehydrogenase assembly factor 2, mitochondrial OS=Mus musculus GN=Sdhaf2 PE=2 SV=1	97.9878	2.17174	3	0
Q8C7E7	Starch-binding domain-containing protein 1 OS=Mus musculus GN=Stbd1 PE=1 SV=1	96.7668	1.93479	5	0
Q8C7E9	Cleavage stimulation factor subunit 2 tau variant OS=Mus musculus GN=Cstf2t PE=1 SV=2	96.6965	1.35326	2	0
Q8C7K6	Prenylcysteine oxidase-like OS=Mus musculus GN=Pcyox1l PE=2 SV=1	97.5386	1.66499	5	0
Q8C7R4	Ubiquitin-like modifier-activating enzyme 6 OS=Mus musculus GN=Uba6 PE=1 SV=1	98.621	0.225719	3	0
Q8C7V8	Coiled-coil domain-containing protein 134 OS=Mus musculus GN=Ccdc134 PE=2 SV=1	96.6025	2.28061	3	0
Q8C7X2	ER membrane protein complex subunit 1 OS=Mus musculus GN=Emc1 PE=1 SV=1	96.6759	5.50496	15	0
Q8C854	Myelin expression factor 2 OS=Mus musculus GN=Myef2 PE=1 SV=1	96.9172	3.95599	5	0
Q8C9B9	Death-inducer obliterator 1 OS=Mus musculus GN=Dido1 PE=1 SV=4	91.6603	3.3063	2	0
Q8CAK1	Putative transferase CAF17 homolog, mitochondrial OS=Mus musculus GN=Iba57 PE=1 SV=1	94.0133	6.76879	3	0
Q8CAQ8	MICOS complex subunit Mic60 OS=Mus musculus GN=Immt PE=1 SV=1	96.5989	5.99227	33	0
Q8CC88	von Willebrand factor A domain-containing protein 8 OS=Mus musculus GN=Vwa8 PE=2 SV=2	91.0705	22.1415	13	0
Q8CCF0	U4/U6 small nuclear ribonucleoprotein Prp31 OS=Mus musculus GN=Prpf31 PE=1 SV=3	98.8738	1.27667	2	0
Q8CCJ3	E3 UFM1-protein ligase 1 OS=Mus musculus GN=Ufl1 PE=1 SV=2	97.3512	2.73898	8	0
Q8CCK0	Core histone macro-H2A.2 OS=Mus musculus GN=H2afy2 PE=1 SV=3	97.692	1.5844	3	0
Q8CD10	Calcium uptake protein 2, mitochondrial OS=Mus musculus GN=Micu2 PE=1 SV=2	98.9257	0.821406	6	0
Q8CE21	Putative uncharacterized protein OS=Mus musculus GN=Nolc1 PE=2 SV=1	96.1591	3.20726	9	0
Q8CEE7	Retinol dehydrogenase 13 OS=Mus musculus GN=Rdh13 PE=2 SV=1	91.7801	6.62692	3	0
Q8CFD4	Sorting nexin-8 OS=Mus musculus GN=Snx8 PE=2 SV=1	99.4263	NA	1	0
Q8CFE6	Sodium-coupled neutral amino acid transporter 2 OS=Mus musculus GN=Slc38a2 PE=1 SV=1	96.1464	4.75676	3	0
Q8CFI5	Probable proline--tRNA ligase, mitochondrial OS=Mus musculus GN=Pars2 PE=2 SV=2	99.5401	NA	1	0
Q8CFI7	DNA-directed RNA polymerase II subunit RPB2 OS=Mus musculus GN=Polr2b PE=2 SV=2	86.9439	30.1427	9	0
Q8CFQ3	Intron-binding protein aquarius OS=Mus musculus GN=Aqr PE=2 SV=2	94.2686	8.64233	8	0
Q8CG76	Aflatoxin B1 aldehyde reductase member 2 OS=Mus musculus GN=Akr7a2 PE=1 SV=3	99.4386	0.431396	2	0
Q8CGB6	Tensin-like C1 domain-containing phosphatase OS=Mus musculus GN=Tenc1 PE=1 SV=1	81.4432	NA	1	0
Q8CGC7	Bifunctional glutamate/proline--tRNA ligase OS=Mus musculus GN=Eprs PE=1 SV=4	89.4478	24.0741	14	0
Q8CGK3	Lon protease homolog, mitochondrial OS=Mus musculus GN=Lonp1 PE=1 SV=2	96.6763	2.57141	34	0
Q8CGP5	Histone H2A type 1-F OS=Mus musculus GN=Hist1h2af PE=1 SV=3	96.5285	5.09964	16	0
Q8CGY8	UDP-N-acetylglucosamine--peptide N-acetylglucosaminyltransferase 110 kDa subunit OS=Mus musculus GN=Ogt PE=1 SV=2	95.9795	2.33344	3	0
Q8CH18	Cell division cycle and apoptosis regulator protein 1 OS=Mus musculus GN=Ccar1 PE=1 SV=1	97.6988	2.44506	13	0
Q8CHT0	Delta-1-pyrroline-5-carboxylate dehydrogenase, mitochondrial OS=Mus musculus GN=Aldh4a1 PE=1 SV=3	89.1268	16.371	6	0
Q8CI43	Myosin light chain 6B OS=Mus musculus GN=Myl6b PE=2 SV=1	91.8277	22.7855	15	0
Q8CIB5	Fermitin family homolog 2 OS=Mus musculus GN=Fermt2 PE=1 SV=1	96.4835	3.0563	3	0
Q8CIM3	D-2-hydroxyglutarate dehydrogenase, mitochondrial OS=Mus musculus GN=D2hgdh PE=1 SV=3	86.4398	29.6744	8	0
Q8CIM8	Integrator complex subunit 4 OS=Mus musculus GN=Ints4 PE=1 SV=1	76.4898	45.3767	4	0
Q8CJF7	Protein ELYS OS=Mus musculus GN=Ahctf1 PE=1 SV=1	92.326	1.888	2	0
Q8CJG0	Protein argonaute-2 OS=Mus musculus GN=Ago2 PE=1 SV=3	97.626	1.64865	5	0
Q8JZM7	Parafibromin OS=Mus musculus GN=Cdc73 PE=2 SV=1	97.8797	0.496557	2	0
Q8JZN5	Acyl-CoA dehydrogenase family member 9, mitochondrial OS=Mus musculus GN=Acad9 PE=1 SV=2	97.4394	2.26595	17	0
Q8JZN7	Mitochondrial Rho GTPase 2 OS=Mus musculus GN=Rhot2 PE=2 SV=1	97.1802	2.75687	2	0
Q8JZQ2	AFG3-like protein 2 OS=Mus musculus GN=Afg3l2 PE=1 SV=1	96.8161	2.57256	11	0
Q8JZQ9	Eukaryotic translation initiation factor 3 subunit B OS=Mus musculus GN=Eif3b PE=1 SV=1	96.0495	2.38363	6	0
Q8JZU2	Tricarboxylate transport protein, mitochondrial OS=Mus musculus GN=Slc25a1 PE=2 SV=1	98.1791	0.78864	6	0
Q8JZX4	Splicing factor 45 OS=Mus musculus GN=Rbm17 PE=1 SV=1	98.8318	NA	1	0
Q8K009	Mitochondrial 10-formyltetrahydrofolate dehydrogenase OS=Mus musculus GN=Aldh1l2 PE=1 SV=2	96.2314	2.21504	37	0
Q8K019	Bcl-2-associated transcription factor 1 OS=Mus musculus GN=Bclaf1 PE=1 SV=2	95.7894	2.15222	2	0
Q8K0C4	Lanosterol 14-alpha demethylase OS=Mus musculus GN=Cyp51a1 PE=2 SV=1	98.9054	0.874214	3	0
Q8K0D5	Elongation factor G, mitochondrial OS=Mus musculus GN=Gfm1 PE=2 SV=1	90.7792	24.4603	14	0
Q8K0L9	Zinc finger and BTB domain-containing protein 20 OS=Mus musculus GN=Zbtb20 PE=1 SV=1	97.7942	2.12682	4	0
Q8K0U4	Heat shock 70 kDa protein 12A OS=Mus musculus GN=Hspa12a PE=1 SV=1	97.2329	2.54544	3	0
Q8K0Z7	Translational activator of cytochrome c oxidase 1 OS=Mus musculus GN=Taco1 PE=1 SV=1	96.1433	1.40316	2	0
Q8K1A6	Coiled-coil and C2 domain-containing protein 1A OS=Mus musculus GN=Cc2d1a PE=1 SV=2	53.5416	63.8583	2	0
Q8K1C0	Protein angel homolog 2 OS=Mus musculus GN=Angel2 PE=2 SV=1	97.439	2.93784	2	0
Q8K1J6	CCA tRNA nucleotidyltransferase 1, mitochondrial OS=Mus musculus GN=Trnt1 PE=1 SV=1	98.44	0.803515	4	0
Q8K1N1	Calcium-independent phospholipase A2-gamma OS=Mus musculus GN=Pnpla8 PE=1 SV=1	98.8485	0.136801	2	0
Q8K1R3	Polyribonucleotide nucleotidyltransferase 1, mitochondrial OS=Mus musculus GN=Pnpt1 PE=1 SV=1	95.5429	3.87293	11	0
Q8K1Z0	Ubiquinone biosynthesis protein COQ9, mitochondrial OS=Mus musculus GN=Coq9 PE=1 SV=1	99.2155	0.457379	5	0
Q8K224	N-acetyltransferase 10 OS=Mus musculus GN=Nat10 PE=2 SV=1	97.2748	1.79149	5	0
Q8K268	ATP-binding cassette sub-family F member 3 OS=Mus musculus GN=Abcf3 PE=1 SV=1	98.2004	1.69481	3	0
Q8K273	Membrane magnesium transporter 1 OS=Mus musculus GN=Mmgt1 PE=2 SV=1	98.1163	2.05611	3	0
Q8K297	Procollagen galactosyltransferase 1 OS=Mus musculus GN=Colgalt1 PE=1 SV=2	95.9523	4.28778	9	0
Q8K2B3	Succinate dehydrogenase [ubiquinone] flavoprotein subunit, mitochondrial OS=Mus musculus GN=Sdha PE=1 SV=1	97.717	2.21206	16	0
Q8K2C7	Protein OS-9 OS=Mus musculus GN=Os9 PE=1 SV=2	76.6716	41.1437	9	0
Q8K2C9	Very-long-chain (3R)-3-hydroxyacyl-CoA dehydratase 3 OS=Mus musculus GN=ptplad1 PE=1 SV=2	97.3356	3.35484	3	0
Q8K2F0	Bromodomain-containing protein 3 OS=Mus musculus GN=Brd3 PE=1 SV=2	95.7706	0.964358	2	0
Q8K2M0	39S ribosomal protein L38, mitochondrial OS=Mus musculus GN=Mrpl38 PE=2 SV=2	97.6024	1.34204	6	0
Q8K2V6	Importin-11 OS=Mus musculus GN=Ipo11 PE=1 SV=1	97.657	1.20297	2	0
Q8K2Y7	39S ribosomal protein L47, mitochondrial OS=Mus musculus GN=Mrpl47 PE=2 SV=2	91.0505	11.5503	3	0
Q8K2Z4	Condensin complex subunit 1 OS=Mus musculus GN=Ncapd2 PE=1 SV=2	73.0453	42.6111	8	0
Q8K327	Chromosome alignment-maintaining phosphoprotein 1 OS=Mus musculus GN=Champ1 PE=1 SV=1	97.9463	2.44202	2	0
Q8K363	ATP-dependent RNA helicase DDX18 OS=Mus musculus GN=Ddx18 PE=2 SV=1	98.346	0.368625	2	0
Q8K370	Acyl-CoA dehydrogenase family member 10 OS=Mus musculus GN=Acad10 PE=1 SV=1	97.6793	2.53843	5	0
Q8K3A0	Iron-sulfur cluster co-chaperone protein HscB, mitochondrial OS=Mus musculus GN=Hscb PE=2 SV=2	97.2174	2.27438	3	0
Q8K3H0	DCC-interacting protein 13-alpha OS=Mus musculus GN=Appl1 PE=1 SV=1	98.1385	0.776346	2	0
Q8K411	Presequence protease, mitochondrial OS=Mus musculus GN=Pitrm1 PE=1 SV=1	93.5561	18.7758	22	0
Q8K4F5	Alpha/beta hydrolase domain-containing protein 11 OS=Mus musculus GN=Abhd11 PE=1 SV=1	97.7424	2.46641	4	0
Q8K4P0	pre-mRNA 3' end processing protein WDR33 OS=Mus musculus GN=Wdr33 PE=1 SV=1	97.3144	3.09707	3	0
Q8K4X7	1-acyl-sn-glycerol-3-phosphate acyltransferase delta OS=Mus musculus GN=Agpat4 PE=2 SV=1	99.5982	0.0834708	2	0
Q8K4Z3	NAD(P)H-hydrate epimerase OS=Mus musculus GN=Apoa1bp PE=1 SV=1	93.4134	10.6443	4	0
Q8K4Z5	Splicing factor 3A subunit 1 OS=Mus musculus GN=Sf3a1 PE=1 SV=1	98.1669	1.99879	14	0
Q8K5B2	Multiple coagulation factor deficiency protein 2 homolog OS=Mus musculus GN=Mcfd2 PE=2 SV=1	99.5243	NA	1	0
Q8N7N5	DDB1- and CUL4-associated factor 8 OS=Mus musculus GN=Dcaf8 PE=1 SV=1	98.1597	1.02975	3	0
Q8QZS1	3-hydroxyisobutyryl-CoA hydrolase, mitochondrial OS=Mus musculus GN=Hibch PE=1 SV=1	97.0677	2.39577	9	0
Q8QZT1	Acetyl-CoA acetyltransferase, mitochondrial OS=Mus musculus GN=Acat1 PE=1 SV=1	98.7226	0.957404	19	0
Q8QZY1	Eukaryotic translation initiation factor 3 subunit L OS=Mus musculus GN=Eif3l PE=1 SV=1	98.0713	0.726108	3	0
Q8QZY9	Splicing factor 3B subunit 4 OS=Mus musculus GN=Sf3b4 PE=2 SV=1	97.1817	1.60119	2	0
Q8R035	Peptidyl-tRNA hydrolase ICT1, mitochondrial OS=Mus musculus GN=Ict1 PE=1 SV=1	78.7132	27.0068	3	0
Q8R081	Heterogeneous nuclear ribonucleoprotein L OS=Mus musculus GN=Hnrnpl PE=1 SV=2	97.8504	1.37732	10	0
Q8R086	Sulfite oxidase, mitochondrial OS=Mus musculus GN=Suox PE=2 SV=2	97.1038	4.41488	4	0
Q8R0F8	Acylpyruvase FAHD1, mitochondrial OS=Mus musculus GN=Fahd1 PE=1 SV=2	95.4701	5.50963	2	0
Q8R0G9	Nuclear pore complex protein Nup133 OS=Mus musculus GN=Nup133 PE=1 SV=2	86.1386	31.6177	8	0
Q8R0W0	Epiplakin OS=Mus musculus GN=Eppk1 PE=1 SV=2	98.7672	1.54285	2	0
Q8R0Y6	Cytosolic 10-formyltetrahydrofolate dehydrogenase OS=Mus musculus GN=Aldh1l1 PE=1 SV=1	96.0848	2.46643	3	0
Q8R127	Saccharopine dehydrogenase-like oxidoreductase OS=Mus musculus GN=Sccpdh PE=2 SV=1	97.7917	2.12873	5	0
Q8R164	Valacyclovir hydrolase OS=Mus musculus GN=Bphl PE=1 SV=1	97.841	1.49116	4	0
Q8R1B4	Eukaryotic translation initiation factor 3 subunit C OS=Mus musculus GN=Eif3c PE=1 SV=1	95.6161	2.93655	5	0
Q8R1F1	Niban-like protein 1 OS=Mus musculus GN=Fam129b PE=2 SV=2	97.3036	1.95426	9	0
Q8R1G6	PDZ and LIM domain protein 2 OS=Mus musculus GN=Pdlim2 PE=1 SV=1	98.8709	NA	1	0
Q8R1I1	Cytochrome b-c1 complex subunit 9 OS=Mus musculus GN=Uqcr10 PE=1 SV=1	94.233	4.35297	3	0
Q8R1M2	Histone H2A.J OS=Mus musculus GN=H2afj PE=1 SV=1	96.5285	5.09964	16	0
Q8R1V4	Transmembrane emp24 domain-containing protein 4 OS=Mus musculus GN=Tmed4 PE=2 SV=1	54.5929	63.369	2	0
Q8R2N2	Cirhin OS=Mus musculus GN=Cirh1a PE=2 SV=3	97.8493	0.542284	2	0
Q8R2Q4	Ribosome-releasing factor 2, mitochondrial OS=Mus musculus GN=Gfm2 PE=2 SV=2	81.7408	34.7114	5	0
Q8R2R6	Mitochondrial ribosome-associated GTPase 1 OS=Mus musculus GN=Mtg1 PE=2 SV=2	99.4807	NA	1	0
Q8R2U0	Nucleoporin SEH1 OS=Mus musculus GN=Seh1l PE=2 SV=1	96.857	NA	1	0
Q8R2Y0	Monoacylglycerol lipase ABHD6 OS=Mus musculus GN=Abhd6 PE=2 SV=1	93.0245	11.5008	4	0
Q8R2Y8	Peptidyl-tRNA hydrolase 2, mitochondrial OS=Mus musculus GN=Ptrh2 PE=2 SV=1	97.6092	1.79097	7	0
Q8R326	Paraspeckle component 1 OS=Mus musculus GN=Pspc1 PE=1 SV=1	95.5322	5.18214	2	0
Q8R3F5	Malonyl-CoA-acyl carrier protein transacylase, mitochondrial OS=Mus musculus GN=Mcat PE=1 SV=3	97.1213	2.47492	7	0
Q8R3K3	Pentatricopeptide repeat-containing protein 2, mitochondrial OS=Mus musculus GN=Ptcd2 PE=2 SV=1	97.7422	NA	1	0
Q8R3P6	von Willebrand factor A domain-containing protein 9 OS=Mus musculus GN=Vwa9 PE=2 SV=1	96.0091	3.42584	4	0
Q8R3Q6	Coiled-coil domain-containing protein 58 OS=Mus musculus GN=Ccdc58 PE=2 SV=1	94.7892	3.24281	3	0
Q8R404	Protein QIL1 OS=Mus musculus GN=Qil1 PE=2 SV=1	96.5373	0.327513	2	0
Q8R422	CD109 antigen OS=Mus musculus GN=Cd109 PE=2 SV=1	93.5589	4.13426	2	0
Q8R429	Sarcoplasmic/endoplasmic reticulum calcium ATPase 1 OS=Mus musculus GN=Atp2a1 PE=2 SV=1	98.3953	1.60753	26	0
Q8R480	Nuclear pore complex protein Nup85 OS=Mus musculus GN=Nup85 PE=1 SV=1	68.725	38.4319	7	0
Q8R4N0	Citrate lyase subunit beta-like protein, mitochondrial OS=Mus musculus GN=Clybl PE=1 SV=2	96.9274	2.72268	5	0
Q8R4R6	Nucleoporin NUP53 OS=Mus musculus GN=Nup35 PE=1 SV=2	98.5596	0.55362	2	0
Q8R5C5	Beta-centractin OS=Mus musculus GN=Actr1b PE=1 SV=1	79.8009	39.8696	5	0
Q8R5J9	PRA1 family protein 3 OS=Mus musculus GN=Arl6ip5 PE=1 SV=2	97.4677	2.24383	6	0
Q8VBT0	Thioredoxin-related transmembrane protein 1 OS=Mus musculus GN=Tmx1 PE=1 SV=1	97.1477	4.02021	4	0
Q8VBZ3	Cleft lip and palate transmembrane protein 1 homolog OS=Mus musculus GN=Clptm1 PE=2 SV=1	97.7431	1.84028	6	0
Q8VCB1	Nucleoporin NDC1 OS=Mus musculus GN=Ndc1 PE=2 SV=1	96.4518	2.51727	2	0
Q8VCH6	Delta(24)-sterol reductase OS=Mus musculus GN=Dhcr24 PE=2 SV=1	96.3661	3.53729	7	0
Q8VCH8	UBX domain-containing protein 4 OS=Mus musculus GN=Ubxn4 PE=1 SV=1	99.5228	0.451737	2	0
Q8VCM4	Lipoyltransferase 1, mitochondrial OS=Mus musculus GN=Lipt1 PE=2 SV=1	94.8777	4.5459	2	0
Q8VCM8	Nicalin OS=Mus musculus GN=Ncln PE=2 SV=2	92.7196	9.4032	14	0
Q8VCS3	Glycosaminoglycan xylosylkinase OS=Mus musculus GN=Fam20b PE=2 SV=1	99.684	NA	1	0
Q8VCW8	Acyl-CoA synthetase family member 2, mitochondrial OS=Mus musculus GN=Acsf2 PE=1 SV=1	96.4767	3.42644	4	0
Q8VCX5	Calcium uptake protein 1, mitochondrial OS=Mus musculus GN=Micu1 PE=1 SV=1	98.1008	1.97966	13	0
Q8VCY6	U3 small nucleolar RNA-associated protein 6 homolog OS=Mus musculus GN=Utp6 PE=2 SV=1	96.4639	3.72404	2	0
Q8VDD5	Myosin-9 OS=Mus musculus GN=Myh9 PE=1 SV=4	95.9642	11.7096	76	0
Q8VDD9	PH-interacting protein OS=Mus musculus GN=Phip PE=1 SV=2	96.3172	3.41371	3	0
Q8VDM6	Heterogeneous nuclear ribonucleoprotein U-like protein 1 OS=Mus musculus GN=Hnrnpul1 PE=1 SV=1	48.6579	67.0466	2	0
Q8VDN2	Sodium/potassium-transporting ATPase subunit alpha-1 OS=Mus musculus GN=Atp1a1 PE=1 SV=1	97.8479	2.77946	20	0
Q8VDP3	Protein-methionine sulfoxide oxidase MICAL1 OS=Mus musculus GN=Mical1 PE=1 SV=1	66.703	22.0868	2	0
Q8VDP4	Cell cycle and apoptosis regulator protein 2 OS=Mus musculus GN=Ccar2 PE=1 SV=2	93.5331	NA	1	0
Q8VDP6	CDP-diacylglycerol--inositol 3-phosphatidyltransferase OS=Mus musculus GN=Cdipt PE=1 SV=1	99.2228	0.514228	5	0
Q8VDT9	39S ribosomal protein L50, mitochondrial OS=Mus musculus GN=Mrpl50 PE=2 SV=2	96.1612	NA	1	0
Q8VE22	28S ribosomal protein S23, mitochondrial OS=Mus musculus GN=Mrps23 PE=1 SV=1	95.291	7.12991	8	0
Q8VE80	THO complex subunit 3 OS=Mus musculus GN=Thoc3 PE=2 SV=1	95.4335	NA	1	0
Q8VEH3	ADP-ribosylation factor-like protein 8A OS=Mus musculus GN=Arl8a PE=2 SV=1	97.8172	1.0121	2	0
Q8VEH6	COBW domain-containing protein 1 OS=Mus musculus GN=Cbwd1 PE=2 SV=1	96.1418	NA	1	0
Q8VEH8	Endoplasmic reticulum lectin 1 OS=Mus musculus GN=Erlec1 PE=2 SV=1	96.3363	4.59111	2	0
Q8VEM8	Phosphate carrier protein, mitochondrial OS=Mus musculus GN=Slc25a3 PE=1 SV=1	97.8377	2.33336	19	0
Q8VHE0	Translocation protein SEC63 homolog OS=Mus musculus GN=Sec63 PE=2 SV=4	97.0396	5.76987	6	0
Q8VHK9	ATP-dependent RNA helicase DHX36 OS=Mus musculus GN=Dhx36 PE=1 SV=2	98.2509	1.28998	2	0
Q8VI56	Low-density lipoprotein receptor-related protein 4 OS=Mus musculus GN=Lrp4 PE=1 SV=3	93.6689	NA	1	0
Q8VI75	Importin-4 OS=Mus musculus GN=Ipo4 PE=1 SV=1	99.5084	NA	1	0
Q8VIJ6	Splicing factor, proline- and glutamine-rich OS=Mus musculus GN=Sfpq PE=1 SV=1	93.1468	21.3562	20	0
Q91V01	Lysophospholipid acyltransferase 5 OS=Mus musculus GN=Lpcat3 PE=1 SV=1	91.0888	NA	1	0
Q91V12	Cytosolic acyl coenzyme A thioester hydrolase OS=Mus musculus GN=Acot7 PE=1 SV=2	97.4504	3.06591	3	0
Q91V61	Sideroflexin-3 OS=Mus musculus GN=Sfxn3 PE=1 SV=1	98.8385	0.548955	16	0
Q91VA6	Polymerase delta-interacting protein 2 OS=Mus musculus GN=Poldip2 PE=2 SV=1	96.9813	3.3063	6	0
Q91VC3	Eukaryotic initiation factor 4A-III OS=Mus musculus GN=Eif4a3 PE=2 SV=3	97.8574	1.70426	18	0
Q91VC9	Growth hormone-inducible transmembrane protein OS=Mus musculus GN=Ghitm PE=2 SV=1	96.9518	NA	1	0
Q91VD9	NADH-ubiquinone oxidoreductase 75 kDa subunit, mitochondrial OS=Mus musculus GN=Ndufs1 PE=1 SV=2	95.3997	14.1388	27	0
Q91VE0	Long-chain fatty acid transport protein 4 OS=Mus musculus GN=Slc27a4 PE=1 SV=1	99.6203	0.267365	2	0
Q91VH6	Protein MEMO1 OS=Mus musculus GN=Memo1 PE=1 SV=1	96.2634	1.35754	2	0
Q91VI7	Ribonuclease inhibitor OS=Mus musculus GN=Rnh1 PE=1 SV=1	98.178	1.22392	6	0
Q91VM5	RNA binding motif protein, X-linked-like-1 OS=Mus musculus GN=Rbmxl1 PE=1 SV=1	94.8546	8.13129	6	0
Q91VM9	Inorganic pyrophosphatase 2, mitochondrial OS=Mus musculus GN=Ppa2 PE=1 SV=1	91.6559	13.3875	8	0
Q91VR5	ATP-dependent RNA helicase DDX1 OS=Mus musculus GN=Ddx1 PE=1 SV=1	98.2604	1.94822	11	0
Q91VT4	Carbonyl reductase family member 4 OS=Mus musculus GN=Cbr4 PE=1 SV=2	96.0399	4.33142	4	0
Q91VX2	Ubiquitin-associated protein 2 OS=Mus musculus GN=Ubap2 PE=1 SV=1	72.7035	NA	1	0
Q91VX9	Transmembrane protein 168 OS=Mus musculus GN=Tmem168 PE=2 SV=1	98.705	NA	1	0
Q91W39	Nuclear receptor coactivator 5 OS=Mus musculus GN=Ncoa5 PE=1 SV=1	84.9636	27.9872	4	0
Q91W90	Thioredoxin domain-containing protein 5 OS=Mus musculus GN=Txndc5 PE=1 SV=2	97.7426	1.87538	9	0
Q91W97	Putative hexokinase HKDC1 OS=Mus musculus GN=Hkdc1 PE=2 SV=1	99.168	NA	1	0
Q91WD5	NADH dehydrogenase [ubiquinone] iron-sulfur protein 2, mitochondrial OS=Mus musculus GN=Ndufs2 PE=1 SV=1	96.6925	6.37604	19	0
Q91WK1	SPRY domain-containing protein 4 OS=Mus musculus GN=Spryd4 PE=1 SV=1	96.2835	4.85262	3	0
Q91WM1	Spermatid perinuclear RNA-binding protein OS=Mus musculus GN=Strbp PE=1 SV=1	91.4503	NA	1	0
Q91WM2	Cat eye syndrome critical region protein 5 homolog OS=Mus musculus GN=Cecr5 PE=2 SV=1	66.8506	51.9656	3	0
Q91WQ3	Tyrosine--tRNA ligase, cytoplasmic OS=Mus musculus GN=Yars PE=2 SV=3	94.9346	1.66514	3	0
Q91WS0	CDGSH iron-sulfur domain-containing protein 1 OS=Mus musculus GN=Cisd1 PE=1 SV=1	97.6815	0.956463	5	0
Q91X78	Erlin-1 OS=Mus musculus GN=Erlin1 PE=1 SV=1	95.399	3.98275	4	0
Q91XC9	Peroxisomal membrane protein PEX16 OS=Mus musculus GN=Pex16 PE=2 SV=2	99.7931	0.0469587	3	0
Q91XL3	UDP-glucuronic acid decarboxylase 1 OS=Mus musculus GN=Uxs1 PE=2 SV=1	93.2199	7.62216	2	0
Q91XV3	Brain acid soluble protein 1 OS=Mus musculus GN=Basp1 PE=1 SV=3	93.1996	23.0714	17	0
Q91YH5	Atlastin-3 OS=Mus musculus GN=Atl3 PE=2 SV=1	99.0011	0.636227	10	0
Q91YJ5	Translation initiation factor IF-2, mitochondrial OS=Mus musculus GN=Mtif2 PE=1 SV=2	92.2301	8.51897	5	0
Q91YM4	Protein TBRG4 OS=Mus musculus GN=Tbrg4 PE=2 SV=1	94.9811	5.28934	7	0
Q91YP0	L-2-hydroxyglutarate dehydrogenase, mitochondrial OS=Mus musculus GN=L2hgdh PE=1 SV=1	99.0604	0.717129	4	0
Q91YP2	Neurolysin, mitochondrial OS=Mus musculus GN=Nln PE=2 SV=1	72.8509	46.8465	4	0
Q91YR1	Twinfilin-1 OS=Mus musculus GN=Twf1 PE=1 SV=2	87.3164	NA	1	0
Q91YR7	Pre-mRNA-processing factor 6 OS=Mus musculus GN=Prpf6 PE=2 SV=1	89.3227	28.6549	11	0
Q91YT0	NADH dehydrogenase [ubiquinone] flavoprotein 1, mitochondrial OS=Mus musculus GN=Ndufv1 PE=1 SV=1	98.1874	1.28024	8	0
Q91YW3	DnaJ homolog subfamily C member 3 OS=Mus musculus GN=Dnajc3 PE=1 SV=1	87.2105	32.6476	8	0
Q91Z31	Polypyrimidine tract-binding protein 2 OS=Mus musculus GN=Ptbp2 PE=1 SV=2	97.2492	3.3998	2	0
Q91ZA3	Propionyl-CoA carboxylase alpha chain, mitochondrial OS=Mus musculus GN=Pcca PE=1 SV=2	91.1973	24.1684	15	0
Q91ZE0	Trimethyllysine dioxygenase, mitochondrial OS=Mus musculus GN=Tmlhe PE=1 SV=2	94.8427	3.0008	7	0
Q91ZW2	GDP-fucose protein O-fucosyltransferase 1 OS=Mus musculus GN=Pofut1 PE=1 SV=1	95.633	4.03545	4	0
Q91ZW3	SWI/SNF-related matrix-associated actin-dependent regulator of chromatin subfamily A member 5 OS=Mus musculus GN=Smarca5 PE=1 SV=1	96.3256	4.53047	13	0
Q91ZX7	Prolow-density lipoprotein receptor-related protein 1 OS=Mus musculus GN=Lrp1 PE=1 SV=1	95.396	12.1592	56	0
Q920A7	AFG3-like protein 1 OS=Mus musculus GN=Afg3l1 PE=2 SV=2	74.9618	46.939	4	0
Q920B9	FACT complex subunit SPT16 OS=Mus musculus GN=Supt16h PE=1 SV=2	94.9603	4.68806	8	0
Q920L1	Fatty acid desaturase 1 OS=Mus musculus GN=Fads1 PE=2 SV=1	88.592	9.61279	5	0
Q921G7	Electron transfer flavoprotein-ubiquinone oxidoreductase, mitochondrial OS=Mus musculus GN=Etfdh PE=1 SV=1	88.735	26.4713	12	0
Q921H8	3-ketoacyl-CoA thiolase A, peroxisomal OS=Mus musculus GN=Acaa1a PE=1 SV=1	94.0587	13.2409	14	0
Q921M3	Splicing factor 3B subunit 3 OS=Mus musculus GN=Sf3b3 PE=2 SV=1	93.0143	19.7037	21	0
Q921N6	Probable ATP-dependent RNA helicase DDX27 OS=Mus musculus GN=Ddx27 PE=1 SV=3	92.8695	8.94173	4	0
Q921Q7	Ras and Rab interactor 1 OS=Mus musculus GN=Rin1 PE=1 SV=1	98.9746	0.821339	3	0
Q921S7	39S ribosomal protein L37, mitochondrial OS=Mus musculus GN=Mrpl37 PE=2 SV=1	97.4175	2.44211	7	0
Q921T2	Torsin-1A-interacting protein 1 OS=Mus musculus GN=Tor1aip1 PE=1 SV=3	97.0121	2.9124	9	0
Q921Y2	U3 small nucleolar ribonucleoprotein protein IMP3 OS=Mus musculus GN=Imp3 PE=2 SV=1	99.5431	NA	1	0
Q922B1	O-acetyl-ADP-ribose deacetylase MACROD1 OS=Mus musculus GN=Macrod1 PE=1 SV=2	98.7886	0.663151	2	0
Q922D8	C-1-tetrahydrofolate synthase, cytoplasmic OS=Mus musculus GN=Mthfd1 PE=1 SV=4	82.8479	36.015	7	0
Q922F4	Tubulin beta-6 chain OS=Mus musculus GN=Tubb6 PE=1 SV=1	95.2674	11.7406	36	0
Q922H2	[Pyruvate dehydrogenase (acetyl-transferring)] kinase isozyme 3, mitochondrial OS=Mus musculus GN=Pdk3 PE=1 SV=1	79.9435	39.7568	5	0
Q922J9	Fatty acyl-CoA reductase 1 OS=Mus musculus GN=Far1 PE=1 SV=1	88.3025	30.1107	10	0
Q922K7	Probable 28S rRNA (cytosine-C(5))-methyltransferase OS=Mus musculus GN=Nop2 PE=1 SV=1	97.3864	3.9686	5	0
Q922Q1	Mitochondrial amidoxime reducing component 2 OS=Mus musculus GN=Marc2 PE=1 SV=1	97.1523	2.47982	6	0
Q922Q8	Leucine-rich repeat-containing protein 59 OS=Mus musculus GN=Lrrc59 PE=1 SV=1	96.667	4.29946	11	0
Q922R8	Protein disulfide-isomerase A6 OS=Mus musculus GN=Pdia6 PE=1 SV=3	98.1578	1.19206	11	0
Q922U1	U4/U6 small nuclear ribonucleoprotein Prp3 OS=Mus musculus GN=Prpf3 PE=2 SV=1	72.6511	47.7969	4	0
Q922V4	Pleiotropic regulator 1 OS=Mus musculus GN=Plrg1 PE=2 SV=1	62.6858	45.1999	4	0
Q922W5	Pyrroline-5-carboxylate reductase 1, mitochondrial OS=Mus musculus GN=Pycr1 PE=2 SV=1	98.055	0.842184	3	0
Q923D4	Splicing factor 3B subunit 5 OS=Mus musculus GN=Sf3b5 PE=2 SV=1	99.4288	0.271816	3	0
Q923T9	Calcium/calmodulin-dependent protein kinase type II subunit gamma OS=Mus musculus GN=Camk2g PE=1 SV=1	97.3999	2.86961	6	0
Q924D0	Reticulon-4-interacting protein 1, mitochondrial OS=Mus musculus GN=Rtn4ip1 PE=1 SV=2	92.6363	NA	1	0
Q924L1	LETM1 domain-containing protein 1 OS=Mus musculus GN=Letmd1 PE=2 SV=1	89.116	13.001	5	0
Q924T2	28S ribosomal protein S2, mitochondrial OS=Mus musculus GN=Mrps2 PE=2 SV=1	96.9184	3.26947	4	0
Q924Z4	Ceramide synthase 2 OS=Mus musculus GN=Cers2 PE=1 SV=1	98.3884	1.2405	5	0
Q925E7	Serine/threonine-protein phosphatase 2A 55 kDa regulatory subunit B delta isoform OS=Mus musculus GN=Ppp2r2d PE=2 SV=1	95.267	3.54039	4	0
Q925I1	ATPase family AAA domain-containing protein 3 OS=Mus musculus GN=Atad3 PE=1 SV=1	97.1512	2.38951	8	0
Q99J39	Malonyl-CoA decarboxylase, mitochondrial OS=Mus musculus GN=Mlycd PE=1 SV=1	96.5481	3.67863	4	0
Q99J56	Derlin-1 OS=Mus musculus GN=Derl1 PE=1 SV=1	98.6892	1.10253	2	0
Q99J93	Interferon-induced transmembrane protein 2 OS=Mus musculus GN=Ifitm2 PE=1 SV=1	98.9678	NA	1	0
Q99JB2	Stomatin-like protein 2, mitochondrial OS=Mus musculus GN=Stoml2 PE=1 SV=1	95.5064	6.95873	16	0
Q99JB8	Protein kinase C and casein kinase II substrate protein 3 OS=Mus musculus GN=Pacsin3 PE=1 SV=1	98.7645	1.24833	2	0
Q99JF8	PC4 and SFRS1-interacting protein OS=Mus musculus GN=Psip1 PE=1 SV=1	97.8655	1.90929	7	0
Q99JI4	26S proteasome non-ATPase regulatory subunit 6 OS=Mus musculus GN=Psmd6 PE=1 SV=1	94.9154	5.49903	6	0
Q99JI6	Ras-related protein Rap-1b OS=Mus musculus GN=Rap1b PE=2 SV=2	94.4494	7.38592	7	0
Q99JR1	Sideroflexin-1 OS=Mus musculus GN=Sfxn1 PE=1 SV=3	97.7425	2.37584	7	0
Q99JR8	SWI/SNF-related matrix-associated actin-dependent regulator of chromatin subfamily D member 2 OS=Mus musculus GN=Smarcd2 PE=2 SV=2	96.9938	2.66335	3	0
Q99JX7	Nuclear RNA export factor 1 OS=Mus musculus GN=Nxf1 PE=1 SV=3	87.2125	24.4301	5	0
Q99JY0	Trifunctional enzyme subunit beta, mitochondrial OS=Mus musculus GN=Hadhb PE=1 SV=1	98.3342	1.46073	18	0
Q99K23	Ufm1-specific protease 2 OS=Mus musculus GN=Ufsp2 PE=1 SV=1	98.5859	0.341073	4	0
Q99K74	Mediator of RNA polymerase II transcription subunit 24 OS=Mus musculus GN=Med24 PE=1 SV=1	94.2488	5.84463	2	0
Q99KC8	von Willebrand factor A domain-containing protein 5A OS=Mus musculus GN=Vwa5a PE=1 SV=2	93.0458	NA	1	0
Q99KE1	NAD-dependent malic enzyme, mitochondrial OS=Mus musculus GN=Me2 PE=2 SV=1	97.927	1.38679	16	0
Q99KI0	Aconitate hydratase, mitochondrial OS=Mus musculus GN=Aco2 PE=1 SV=1	97.7714	2.45593	43	0
Q99KI3	ER membrane protein complex subunit 3 OS=Mus musculus GN=Emc3 PE=2 SV=3	98.336	3.16654	7	0
Q99KK2	N-acylneuraminate cytidylyltransferase OS=Mus musculus GN=Cmas PE=1 SV=2	98.9335	NA	1	0
Q99KK9	Probable histidine--tRNA ligase, mitochondrial OS=Mus musculus GN=Hars2 PE=2 SV=1	94.4224	6.18188	11	0
Q99KP6	Pre-mRNA-processing factor 19 OS=Mus musculus GN=Prpf19 PE=1 SV=1	98.3377	1.99474	7	0
Q99KV1	DnaJ homolog subfamily B member 11 OS=Mus musculus GN=Dnajb11 PE=1 SV=1	98.8633	0.939452	7	0
Q99L04	Dehydrogenase/reductase SDR family member 1 OS=Mus musculus GN=Dhrs1 PE=2 SV=1	98.9411	0.864038	8	0
Q99L13	3-hydroxyisobutyrate dehydrogenase, mitochondrial OS=Mus musculus GN=Hibadh PE=1 SV=1	96.3707	3.06311	11	0
Q99L43	Phosphatidate cytidylyltransferase 2 OS=Mus musculus GN=Cds2 PE=1 SV=1	96.9375	4.17174	4	0
Q99L45	Eukaryotic translation initiation factor 2 subunit 2 OS=Mus musculus GN=Eif2s2 PE=1 SV=1	97.877	1.89615	6	0
Q99L88	Beta-1-syntrophin OS=Mus musculus GN=Sntb1 PE=1 SV=4	97.5018	2.46436	4	0
Q99LB2	Dehydrogenase/reductase SDR family member 4 OS=Mus musculus GN=Dhrs4 PE=1 SV=3	97.069	1.81259	2	0
Q99LC3	NADH dehydrogenase [ubiquinone] 1 alpha subcomplex subunit 10, mitochondrial OS=Mus musculus GN=Ndufa10 PE=1 SV=1	98.2269	1.41883	16	0
Q99LC5	Electron transfer flavoprotein subunit alpha, mitochondrial OS=Mus musculus GN=Etfa PE=1 SV=2	97.4036	2.06556	16	0
Q99LD8	N(G),N(G)-dimethylarginine dimethylaminohydrolase 2 OS=Mus musculus GN=Ddah2 PE=1 SV=1	98.3362	NA	1	0
Q99LE6	ATP-binding cassette sub-family F member 2 OS=Mus musculus GN=Abcf2 PE=2 SV=1	97.9073	1.65018	9	0
Q99LF4	tRNA-splicing ligase RtcB homolog OS=Mus musculus GN=Rtcb PE=2 SV=1	90.0212	20.2693	7	0
Q99LG2	Transportin-2 OS=Mus musculus GN=Tnpo2 PE=2 SV=1	96.2562	5.08715	3	0
Q99LI7	Cleavage stimulation factor subunit 3 OS=Mus musculus GN=Cstf3 PE=1 SV=1	92.012	12.1565	3	0
Q99LP6	GrpE protein homolog 1, mitochondrial OS=Mus musculus GN=Grpel1 PE=1 SV=1	97.907	2.22252	7	0
Q99LR1	Monoacylglycerol lipase ABHD12 OS=Mus musculus GN=Abhd12 PE=1 SV=2	89.0466	24.6974	8	0
Q99M28	RNA-binding protein with serine-rich domain 1 OS=Mus musculus GN=Rnps1 PE=2 SV=1	98.4116	1.12138	4	0
Q99M87	DnaJ homolog subfamily A member 3, mitochondrial OS=Mus musculus GN=Dnaja3 PE=1 SV=1	98.413	1.33339	3	0
Q99MN9	Propionyl-CoA carboxylase beta chain, mitochondrial OS=Mus musculus GN=Pccb PE=1 SV=2	97.6446	2.45366	10	0
Q99MR8	Methylcrotonoyl-CoA carboxylase subunit alpha, mitochondrial OS=Mus musculus GN=Mccc1 PE=1 SV=2	99.0428	0.723642	4	0
Q99MZ7	Peroxisomal trans-2-enoyl-CoA reductase OS=Mus musculus GN=Pecr PE=1 SV=1	95.9527	3.49297	3	0
Q99N85	28S ribosomal protein S18a, mitochondrial OS=Mus musculus GN=Mrps18a PE=2 SV=1	98.7294	NA	1	0
Q99N87	28S ribosomal protein S5, mitochondrial OS=Mus musculus GN=Mrps5 PE=2 SV=1	67.7725	43.2535	5	0
Q99N92	39S ribosomal protein L27, mitochondrial OS=Mus musculus GN=Mrpl27 PE=2 SV=1	95.229	NA	1	0
Q99N96	39S ribosomal protein L1, mitochondrial OS=Mus musculus GN=Mrpl1 PE=1 SV=2	81.6406	35.6134	6	0
Q99NB9	Splicing factor 3B subunit 1 OS=Mus musculus GN=Sf3b1 PE=1 SV=1	93.3241	13.6794	21	0
Q99PL5	Ribosome-binding protein 1 OS=Mus musculus GN=Rrbp1 PE=1 SV=2	97.8949	2.47389	25	0
Q99PT1	Rho GDP-dissociation inhibitor 1 OS=Mus musculus GN=Arhgdia PE=1 SV=3	96.7416	3.56786	2	0
Q99PV0	Pre-mRNA-processing-splicing factor 8 OS=Mus musculus GN=Prpf8 PE=1 SV=2	97.368	3.598	53	0
Q9CPP6	NADH dehydrogenase [ubiquinone] 1 alpha subcomplex subunit 5 OS=Mus musculus GN=Ndufa5 PE=1 SV=3	97.1433	3.3425	7	0
Q9CPQ1	Cytochrome c oxidase subunit 6C OS=Mus musculus GN=Cox6c PE=1 SV=3	99.578	0.361037	5	0
Q9CPQ3	Mitochondrial import receptor subunit TOM22 homolog OS=Mus musculus GN=Tomm22 PE=2 SV=3	98.8798	0.77498	4	0
Q9CPR5	39S ribosomal protein L15, mitochondrial OS=Mus musculus GN=Mrpl15 PE=2 SV=1	96.6082	3.12948	9	0
Q9CPT4	UPF0556 protein C19orf10 homolog OS=Mus musculus GN=D17Wsu104e PE=2 SV=1	99.2231	0.696841	2	0
Q9CPV4	Glyoxalase domain-containing protein 4 OS=Mus musculus GN=Glod4 PE=1 SV=1	97.5637	0.409224	2	0
Q9CPY7	Cytosol aminopeptidase OS=Mus musculus GN=Lap3 PE=1 SV=3	96.6898	2.48888	11	0
Q9CQ06	39S ribosomal protein L24, mitochondrial OS=Mus musculus GN=Mrpl24 PE=2 SV=1	97.3521	2.14121	4	0
Q9CQ19	Myosin regulatory light polypeptide 9 OS=Mus musculus GN=Myl9 PE=1 SV=3	95.5191	3.68192	5	0
Q9CQ22	Ragulator complex protein LAMTOR1 OS=Mus musculus GN=Lamtor1 PE=1 SV=1	98.7722	0.290957	3	0
Q9CQ28	Diphthine--ammonia ligase OS=Mus musculus GN=Dph6 PE=1 SV=1	98.0017	NA	1	0
Q9CQ40	39S ribosomal protein L49, mitochondrial OS=Mus musculus GN=Mrpl49 PE=2 SV=1	99.1919	0.303116	3	0
Q9CQ54	NADH dehydrogenase [ubiquinone] 1 subunit C2 OS=Mus musculus GN=Ndufc2 PE=1 SV=1	95.6893	2.89134	3	0
Q9CQ60	6-phosphogluconolactonase OS=Mus musculus GN=Pgls PE=2 SV=1	99.0891	0.654695	2	0
Q9CQ62	2,4-dienoyl-CoA reductase, mitochondrial OS=Mus musculus GN=Decr1 PE=1 SV=1	97.885	1.36354	12	0
Q9CQ65	S-methyl-5'-thioadenosine phosphorylase OS=Mus musculus GN=Mtap PE=1 SV=1	97.3038	0.866091	3	0
Q9CQ69	Cytochrome b-c1 complex subunit 8 OS=Mus musculus GN=Uqcrq PE=1 SV=3	97.3374	2.95187	7	0
Q9CQ71	Replication protein A 14 kDa subunit OS=Mus musculus GN=Rpa3 PE=2 SV=1	91.3793	NA	1	0
Q9CQ75	NADH dehydrogenase [ubiquinone] 1 alpha subcomplex subunit 2 OS=Mus musculus GN=Ndufa2 PE=1 SV=3	98.2629	2.02865	5	0
Q9CQ92	Mitochondrial fission 1 protein OS=Mus musculus GN=Fis1 PE=1 SV=1	98.6319	1.25876	4	0
Q9CQB5	CDGSH iron-sulfur domain-containing protein 2 OS=Mus musculus GN=Cisd2 PE=1 SV=1	96.0545	0.403838	2	0
Q9CQC7	NADH dehydrogenase [ubiquinone] 1 beta subcomplex subunit 4 OS=Mus musculus GN=Ndufb4 PE=1 SV=3	96.7726	3.38633	5	0
Q9CQD1	Ras-related protein Rab-5A OS=Mus musculus GN=Rab5a PE=1 SV=1	96.726	1.99259	7	0
Q9CQE1	Protein NipSnap homolog 3B OS=Mus musculus GN=Nipsnap3b PE=1 SV=1	95.3375	6.91033	4	0
Q9CQE3	28S ribosomal protein S17, mitochondrial OS=Mus musculus GN=Mrps17 PE=2 SV=1	97.4241	2.16928	2	0
Q9CQE7	Endoplasmic reticulum-Golgi intermediate compartment protein 3 OS=Mus musculus GN=Ergic3 PE=2 SV=1	96.3289	NA	1	0
Q9CQE8	UPF0568 protein C14orf166 homolog OS=Mus musculus PE=2 SV=1	96.759	1.30935	2	0
Q9CQF0	39S ribosomal protein L11, mitochondrial OS=Mus musculus GN=Mrpl11 PE=2 SV=1	98.1175	1.04566	3	0
Q9CQF3	Cleavage and polyadenylation specificity factor subunit 5 OS=Mus musculus GN=Nudt21 PE=1 SV=1	94.2512	5.50795	4	0
Q9CQF4	Uncharacterized protein C6orf203 homolog OS=Mus musculus PE=1 SV=1	95.2217	4.46539	3	0
Q9CQH3	NADH dehydrogenase [ubiquinone] 1 beta subcomplex subunit 5, mitochondrial OS=Mus musculus GN=Ndufb5 PE=1 SV=1	96.5328	3.99451	7	0
Q9CQJ8	NADH dehydrogenase [ubiquinone] 1 beta subcomplex subunit 9 OS=Mus musculus GN=Ndufb9 PE=1 SV=3	91.5801	13.6704	5	0
Q9CQL5	39S ribosomal protein L18, mitochondrial OS=Mus musculus GN=Mrpl18 PE=2 SV=1	98.8594	0.431852	3	0
Q9CQN7	39S ribosomal protein L41, mitochondrial OS=Mus musculus GN=Mrpl41 PE=2 SV=1	97.2493	1.65897	3	0
Q9CQQ7	ATP synthase F(0) complex subunit B1, mitochondrial OS=Mus musculus GN=Atp5f1 PE=1 SV=1	97.883	1.72298	11	0
Q9CQR2	40S ribosomal protein S21 OS=Mus musculus GN=Rps21 PE=2 SV=1	97.6121	1.74705	3	0
Q9CQR4	Acyl-coenzyme A thioesterase 13 OS=Mus musculus GN=Acot13 PE=1 SV=1	98.3734	0.684273	2	0
Q9CQS4	Solute carrier family 25 member 46 OS=Mus musculus GN=Slc25a46 PE=1 SV=1	94.3672	NA	1	0
Q9CQU0	Thioredoxin domain-containing protein 12 OS=Mus musculus GN=Txndc12 PE=2 SV=1	99.2657	0.532199	3	0
Q9CQU1	Microfibrillar-associated protein 1 OS=Mus musculus GN=Mfap1 PE=1 SV=1	97.4452	0.711034	2	0
Q9CQV8	14-3-3 protein beta/alpha OS=Mus musculus GN=Ywhab PE=1 SV=3	98.06	1.19127	6	0
Q9CQW2	ADP-ribosylation factor-like protein 8B OS=Mus musculus GN=Arl8b PE=2 SV=1	97.53	1.84436	4	0
Q9CQW9	Interferon-induced transmembrane protein 3 OS=Mus musculus GN=Ifitm3 PE=1 SV=1	99.4609	0.447849	3	0
Q9CQX2	Cytochrome b5 type B OS=Mus musculus GN=Cyb5b PE=1 SV=1	95.5858	4.56145	7	0
Q9CQX8	28S ribosomal protein S36, mitochondrial OS=Mus musculus GN=Mrps36 PE=1 SV=1	98.2163	2.26559	3	0
Q9CQZ5	NADH dehydrogenase [ubiquinone] 1 alpha subcomplex subunit 6 OS=Mus musculus GN=Ndufa6 PE=1 SV=1	97.7995	1.7211	6	0
Q9CQZ6	NADH dehydrogenase [ubiquinone] 1 beta subcomplex subunit 3 OS=Mus musculus GN=Ndufb3 PE=1 SV=1	98.0868	0.7667	3	0
Q9CR20	Immediate early response 3-interacting protein 1 OS=Mus musculus GN=Ier3ip1 PE=2 SV=1	98.9521	NA	1	0
Q9CR57	60S ribosomal protein L14 OS=Mus musculus GN=Rpl14 PE=1 SV=3	98.0346	2.0754	5	0
Q9CR59	Growth arrest and DNA damage-inducible proteins-interacting protein 1 OS=Mus musculus GN=Gadd45gip1 PE=2 SV=1	99.2063	NA	1	0
Q9CR60	Vesicle transport protein GOT1B OS=Mus musculus GN=Golt1b PE=2 SV=1	95.3878	5.99286	2	0
Q9CR62	Mitochondrial 2-oxoglutarate/malate carrier protein OS=Mus musculus GN=Slc25a11 PE=1 SV=3	98.5135	1.18762	14	0
Q9CR67	Transmembrane protein 33 OS=Mus musculus GN=Tmem33 PE=2 SV=1	98.5939	0.749539	3	0
Q9CR68	Cytochrome b-c1 complex subunit Rieske, mitochondrial OS=Mus musculus GN=Uqcrfs1 PE=1 SV=1	97.1644	4.34902	19	0
Q9CR88	28S ribosomal protein S14, mitochondrial OS=Mus musculus GN=Mrps14 PE=1 SV=1	90.8174	NA	1	0
Q9CR89	Endoplasmic reticulum-Golgi intermediate compartment protein 2 OS=Mus musculus GN=Ergic2 PE=2 SV=1	89.6458	7.12639	3	0
Q9CRA4	Methylsterol monooxygenase 1 OS=Mus musculus GN=Msmo1 PE=2 SV=1	98.7781	NA	1	0
Q9CRA5	Golgi phosphoprotein 3 OS=Mus musculus GN=Golph3 PE=1 SV=1	97.5602	1.97809	3	0
Q9CRB2	H/ACA ribonucleoprotein complex subunit 2 OS=Mus musculus GN=Nhp2 PE=2 SV=1	97.6727	1.58594	4	0
Q9CRC8	Leucine-rich repeat-containing protein 40 OS=Mus musculus GN=Lrrc40 PE=2 SV=2	98.8491	0.478805	2	0
Q9CRD0	OCIA domain-containing protein 1 OS=Mus musculus GN=Ociad1 PE=1 SV=1	86.5136	27.8989	13	0
Q9CRD2	ER membrane protein complex subunit 2 OS=Mus musculus GN=Emc2 PE=2 SV=1	93.1776	12.6541	7	0
Q9CRY7	Glycerophosphodiester phosphodiesterase domain-containing protein 1 OS=Mus musculus GN=Gdpd1 PE=2 SV=1	92.9709	2.6099	5	0
Q9CSN1	SNW domain-containing protein 1 OS=Mus musculus GN=Snw1 PE=1 SV=3	98.5438	1.26472	6	0
Q9CU62	Structural maintenance of chromosomes protein 1A OS=Mus musculus GN=Smc1a PE=1 SV=4	97.4099	1.8983	16	0
Q9CW03	Structural maintenance of chromosomes protein 3 OS=Mus musculus GN=Smc3 PE=1 SV=2	90.7817	23.9443	19	0
Q9CWD8	Iron-sulfur protein NUBPL OS=Mus musculus GN=Nubpl PE=2 SV=2	97.5227	2.60973	2	0
Q9CWF2	Tubulin beta-2B chain OS=Mus musculus GN=Tubb2b PE=1 SV=1	95.8025	11.3827	38	0
Q9CWG8	NADH dehydrogenase [ubiquinone] complex I, assembly factor 7 OS=Mus musculus GN=Ndufaf7 PE=2 SV=4	95.4134	2.64921	2	0
Q9CWJ9	Bifunctional purine biosynthesis protein PURH OS=Mus musculus GN=Atic PE=1 SV=2	97.5721	1.50502	3	0
Q9CWU6	Ubiquinol-cytochrome-c reductase complex assembly factor 1 OS=Mus musculus GN=Uqcc1 PE=2 SV=1	95.2908	1.95407	2	0
Q9CWX2	Complex I intermediate-associated protein 30, mitochondrial OS=Mus musculus GN=Ndufaf1 PE=2 SV=2	98.8631	NA	1	0
Q9CWZ3	RNA-binding protein 8A OS=Mus musculus GN=Rbm8a PE=1 SV=3	97.263	1.66004	2	0
Q9CX13	Protein cornichon homolog 4 OS=Mus musculus GN=Cnih4 PE=2 SV=1	98.4329	NA	1	0
Q9CX86	Heterogeneous nuclear ribonucleoprotein A0 OS=Mus musculus GN=Hnrnpa0 PE=1 SV=1	84.7065	30.5658	9	0
Q9CXJ4	ATP-binding cassette sub-family B member 8, mitochondrial OS=Mus musculus GN=Abcb8 PE=2 SV=1	99.5674	0.0525751	2	0
Q9CXR1	Dehydrogenase/reductase SDR family member 7 OS=Mus musculus GN=Dhrs7 PE=2 SV=2	98.454	1.32615	2	0
Q9CXS4	Centromere protein V OS=Mus musculus GN=Cenpv PE=2 SV=2	97.2132	2.02328	5	0
Q9CXT8	Mitochondrial-processing peptidase subunit beta OS=Mus musculus GN=Pmpcb PE=2 SV=1	95.9048	3.09972	6	0
Q9CXV1	Succinate dehydrogenase [ubiquinone] cytochrome b small subunit, mitochondrial OS=Mus musculus GN=Sdhd PE=2 SV=2	97.9875	1.76969	2	0
Q9CXW2	28S ribosomal protein S22, mitochondrial OS=Mus musculus GN=Mrps22 PE=2 SV=1	96.6273	4.12901	10	0
Q9CXY6	Interleukin enhancer-binding factor 2 OS=Mus musculus GN=Ilf2 PE=1 SV=1	97.9489	NA	1	0
Q9CY16	28S ribosomal protein S28, mitochondrial OS=Mus musculus GN=Mrps28 PE=1 SV=1	98.4704	1.11236	3	0
Q9CY27	Very-long-chain enoyl-CoA reductase OS=Mus musculus GN=Tecr PE=1 SV=1	93.3526	8.82779	6	0
Q9CY28	GTP-binding protein 8 OS=Mus musculus GN=Gtpbp8 PE=2 SV=1	64.4353	55.412	3	0
Q9CY50	Translocon-associated protein subunit alpha OS=Mus musculus GN=Ssr1 PE=1 SV=1	97.8413	2.35748	6	0
Q9CYA0	Cysteine-rich with EGF-like domain protein 2 OS=Mus musculus GN=Creld2 PE=2 SV=1	97.3367	2.19285	4	0
Q9CYA6	Zinc finger CCHC domain-containing protein 8 OS=Mus musculus GN=Zcchc8 PE=2 SV=3	97.5355	3.06659	2	0
Q9CYL5	Golgi-associated plant pathogenesis-related protein 1 OS=Mus musculus GN=Glipr2 PE=2 SV=3	98.9393	0.743079	6	0
Q9CYN2	Signal peptidase complex subunit 2 OS=Mus musculus GN=Spcs2 PE=1 SV=1	97.4252	2.98529	6	0
Q9CYN9	Renin receptor OS=Mus musculus GN=Atp6ap2 PE=2 SV=2	93.2529	4.87635	7	0
Q9CYR0	Single-stranded DNA-binding protein, mitochondrial OS=Mus musculus GN=Ssbp1 PE=1 SV=1	97.2677	1.66764	6	0
Q9CZ13	Cytochrome b-c1 complex subunit 1, mitochondrial OS=Mus musculus GN=Uqcrc1 PE=1 SV=2	95.6153	10.6397	22	0
Q9CZ83	39S ribosomal protein L55, mitochondrial OS=Mus musculus GN=Mrpl55 PE=2 SV=1	98.4517	2.01373	3	0
Q9CZD3	Glycine--tRNA ligase OS=Mus musculus GN=Gars PE=1 SV=1	87.9793	28.6485	10	0
Q9CZH3	Proteasome assembly chaperone 3 OS=Mus musculus GN=Psmg3 PE=1 SV=1	97.725	NA	1	0
Q9CZH7	Matrix-remodeling-associated protein 7 OS=Mus musculus GN=Mxra7 PE=1 SV=2	98.2747	1.01476	2	0
Q9CZL5	Pterin-4-alpha-carbinolamine dehydratase 2 OS=Mus musculus GN=Pcbd2 PE=1 SV=2	96.6124	2.10549	5	0
Q9CZN8	Glutamyl-tRNA(Gln) amidotransferase subunit A, mitochondrial OS=Mus musculus GN=Qrsl1 PE=2 SV=1	96.8699	2.60113	4	0
Q9CZP5	Mitochondrial chaperone BCS1 OS=Mus musculus GN=Bcs1l PE=1 SV=1	82.3485	39.7139	6	0
Q9CZR8	Elongation factor Ts, mitochondrial OS=Mus musculus GN=Tsfm PE=1 SV=1	97.9146	0.685744	8	0
Q9CZU3	Superkiller viralicidic activity 2-like 2 OS=Mus musculus GN=Skiv2l2 PE=1 SV=1	98.4129	1.40628	5	0
Q9CZU6	Citrate synthase, mitochondrial OS=Mus musculus GN=Cs PE=1 SV=1	97.4525	2.32226	22	0
Q9CZW4	Long-chain-fatty-acid--CoA ligase 3 OS=Mus musculus GN=Acsl3 PE=1 SV=2	97.3828	2.61159	10	0
Q9CZX7	Type 2 phosphatidylinositol 4,5-bisphosphate 4-phosphatase OS=Mus musculus GN=Tmem55a PE=1 SV=1	98.4039	0.0821658	2	0
Q9CZX9	ER membrane protein complex subunit 4 OS=Mus musculus GN=Emc4 PE=2 SV=1	98.6748	NA	1	0
Q9D023	Mitochondrial pyruvate carrier 2 OS=Mus musculus GN=Mpc2 PE=1 SV=1	98.8728	NA	1	0
Q9D024	Coiled-coil domain-containing protein 47 OS=Mus musculus GN=Ccdc47 PE=2 SV=2	97.4486	2.00052	12	0
Q9D051	Pyruvate dehydrogenase E1 component subunit beta, mitochondrial OS=Mus musculus GN=Pdhb PE=1 SV=1	93.1777	21.0533	18	0
Q9D071	MMS19 nucleotide excision repair protein homolog OS=Mus musculus GN=Mms19 PE=2 SV=1	97.3734	2.11814	5	0
Q9D0B0	Serine/arginine-rich splicing factor 9 OS=Mus musculus GN=Srsf9 PE=1 SV=1	99.4728	NA	1	0
Q9D0D3	Poly(A) RNA polymerase, mitochondrial OS=Mus musculus GN=Mtpap PE=2 SV=1	96.2082	1.13548	2	0
Q9D0E1	Heterogeneous nuclear ribonucleoprotein M OS=Mus musculus GN=Hnrnpm PE=1 SV=3	97.0164	2.43072	25	0
Q9D0F3	Protein ERGIC-53 OS=Mus musculus GN=Lman1 PE=2 SV=1	97.7101	2.35962	18	0
Q9D0G0	28S ribosomal protein S30, mitochondrial OS=Mus musculus GN=Mrps30 PE=2 SV=1	94.9231	9.25492	8	0
Q9D0I9	Arginine--tRNA ligase, cytoplasmic OS=Mus musculus GN=Rars PE=2 SV=2	96.2202	2.91739	8	0
Q9D0J4	ADP-ribosylation factor-like protein 2 OS=Mus musculus GN=Arl2 PE=1 SV=1	97.9039	1.90134	4	0
Q9D0K2	Succinyl-CoA:3-ketoacid coenzyme A transferase 1, mitochondrial OS=Mus musculus GN=Oxct1 PE=1 SV=1	94.7967	13.2928	21	0
Q9D0L4	Uncharacterized aarF domain-containing protein kinase 1 OS=Mus musculus GN=Adck1 PE=2 SV=1	98.5538	1.30492	3	0
Q9D0L7	Armadillo repeat-containing protein 10 OS=Mus musculus GN=Armc10 PE=1 SV=1	98.5514	1.37886	4	0
Q9D0M3	Cytochrome c1, heme protein, mitochondrial OS=Mus musculus GN=Cyc1 PE=1 SV=1	96.7905	2.91965	11	0
Q9D0Q7	39S ribosomal protein L45, mitochondrial OS=Mus musculus GN=Mrpl45 PE=2 SV=1	95.067	4.68539	5	0
Q9D0R2	Threonine--tRNA ligase, cytoplasmic OS=Mus musculus GN=Tars PE=1 SV=2	95.029	2.95277	5	0
Q9D0S9	Histidine triad nucleotide-binding protein 2, mitochondrial OS=Mus musculus GN=Hint2 PE=1 SV=1	98.0285	1.79599	4	0
Q9D0T1	NHP2-like protein 1 OS=Mus musculus GN=Nhp2l1 PE=1 SV=4	92.9988	2.81774	4	0
Q9D125	28S ribosomal protein S25, mitochondrial OS=Mus musculus GN=Mrps25 PE=1 SV=1	86.4004	27.6986	6	0
Q9D172	ES1 protein homolog, mitochondrial OS=Mus musculus GN=D10Jhu81e PE=1 SV=1	97.2938	2.0889	6	0
Q9D1B9	39S ribosomal protein L28, mitochondrial OS=Mus musculus GN=Mrpl28 PE=2 SV=3	94.9242	5.5544	5	0
Q9D1D4	Transmembrane emp24 domain-containing protein 10 OS=Mus musculus GN=Tmed10 PE=2 SV=1	98.1278	1.63902	8	0
Q9D1H8	39S ribosomal protein L53, mitochondrial OS=Mus musculus GN=Mrpl53 PE=2 SV=1	99.424	0.0475662	3	0
Q9D1I2	Bcl10-interacting CARD protein OS=Mus musculus PE=2 SV=1	94.1744	NA	1	0
Q9D1I5	Methylmalonyl-CoA epimerase, mitochondrial OS=Mus musculus GN=Mcee PE=1 SV=1	99.8193	NA	1	0
Q9D1I6	39S ribosomal protein L14, mitochondrial OS=Mus musculus GN=Mrpl14 PE=2 SV=1	99.4815	0.159852	3	0
Q9D1M7	Peptidyl-prolyl cis-trans isomerase FKBP11 OS=Mus musculus GN=Fkbp11 PE=1 SV=1	95.4762	2.2929	4	0
Q9D1N9	39S ribosomal protein L21, mitochondrial OS=Mus musculus GN=Mrpl21 PE=2 SV=1	98.1118	2.46296	4	0
Q9D1P0	39S ribosomal protein L13, mitochondrial OS=Mus musculus GN=Mrpl13 PE=2 SV=1	96.9485	1.5489	7	0
Q9D1Q6	Endoplasmic reticulum resident protein 44 OS=Mus musculus GN=Erp44 PE=1 SV=1	98.728	1.08774	8	0
Q9D1R9	60S ribosomal protein L34 OS=Mus musculus GN=Rpl34 PE=1 SV=2	97.9309	0.480123	2	0
Q9D273	Cob(I)yrinic acid a,c-diamide adenosyltransferase, mitochondrial OS=Mus musculus GN=Mmab PE=1 SV=1	98.5707	1.07309	2	0
Q9D2E2	Target of EGR1 protein 1 OS=Mus musculus GN=Toe1 PE=1 SV=1	99.2763	NA	1	0
Q9D2G2	Dihydrolipoyllysine-residue succinyltransferase component of 2-oxoglutarate dehydrogenase complex, mitochondrial OS=Mus musculus GN=Dlst PE=1 SV=1	91.1584	25.1362	15	0
Q9D2R0	Acetoacetyl-CoA synthetase OS=Mus musculus GN=Aacs PE=2 SV=1	98.7048	1.44976	5	0
Q9D2R6	Cytochrome c oxidase assembly factor 3 homolog, mitochondrial OS=Mus musculus GN=Coa3 PE=2 SV=1	92.1	9.20328	2	0
Q9D2R8	28S ribosomal protein S33, mitochondrial OS=Mus musculus GN=Mrps33 PE=2 SV=1	89.8247	1.59323	2	0
Q9D2U9	Histone H2B type 3-A OS=Mus musculus GN=Hist3h2ba PE=1 SV=3	97.581	2.23549	7	0
Q9D379	Epoxide hydrolase 1 OS=Mus musculus GN=Ephx1 PE=1 SV=2	88.5102	26.9141	22	0
Q9D3D9	ATP synthase subunit delta, mitochondrial OS=Mus musculus GN=Atp5d PE=1 SV=1	98.5968	0.709976	9	0
Q9D3E6	Cohesin subunit SA-1 OS=Mus musculus GN=Stag1 PE=2 SV=3	95.2799	6.46791	5	0
Q9D3P8	Plasminogen receptor (KT) OS=Mus musculus GN=Plgrkt PE=1 SV=1	97.1762	2.76609	5	0
Q9D404	3-oxoacyl-[acyl-carrier-protein] synthase, mitochondrial OS=Mus musculus GN=Oxsm PE=1 SV=1	98.5808	0.876809	3	0
Q9D517	1-acyl-sn-glycerol-3-phosphate acyltransferase gamma OS=Mus musculus GN=Agpat3 PE=1 SV=2	97.8312	2.65443	4	0
Q9D554	Splicing factor 3A subunit 3 OS=Mus musculus GN=Sf3a3 PE=2 SV=2	97.3506	2.57905	8	0
Q9D5T0	ATPase family AAA domain-containing protein 1 OS=Mus musculus GN=Atad1 PE=1 SV=1	96.9471	3.58313	10	0
Q9D666	SUN domain-containing protein 1 OS=Mus musculus GN=Sun1 PE=1 SV=2	97.8461	2.23639	20	0
Q9D6F9	Tubulin beta-4A chain OS=Mus musculus GN=Tubb4a PE=1 SV=3	93.6851	15.5177	20	0
Q9D6J5	NADH dehydrogenase [ubiquinone] 1 beta subcomplex subunit 8, mitochondrial OS=Mus musculus GN=Ndufb8 PE=1 SV=1	99.3174	0.211451	6	0
Q9D6J6	NADH dehydrogenase [ubiquinone] flavoprotein 2, mitochondrial OS=Mus musculus GN=Ndufv2 PE=1 SV=2	97.6743	1.59992	7	0
Q9D6K5	Synaptojanin-2-binding protein OS=Mus musculus GN=Synj2bp PE=1 SV=1	96.3541	4.84568	3	0
Q9D6K8	FUN14 domain-containing protein 2 OS=Mus musculus GN=Fundc2 PE=2 SV=1	99.1375	0.0236287	2	0
Q9D6R2	Isocitrate dehydrogenase [NAD] subunit alpha, mitochondrial OS=Mus musculus GN=Idh3a PE=1 SV=1	95.4567	11.2344	16	0
Q9D6S7	Ribosome-recycling factor, mitochondrial OS=Mus musculus GN=Mrrf PE=1 SV=1	95.0804	3.82151	4	0
Q9D6U8	Protein FAM162A OS=Mus musculus GN=Fam162a PE=2 SV=1	97.7389	1.10742	4	0
Q9D6X6	Serine protease 23 OS=Mus musculus GN=Prss23 PE=2 SV=2	96.715	1.08068	2	0
Q9D6Z1	Nucleolar protein 56 OS=Mus musculus GN=Nop56 PE=1 SV=2	97.8355	2.24434	21	0
Q9D710	Thioredoxin-related transmembrane protein 2 OS=Mus musculus GN=Tmx2 PE=2 SV=1	98.2604	0.632868	2	0
Q9D7B6	Isobutyryl-CoA dehydrogenase, mitochondrial OS=Mus musculus GN=Acad8 PE=1 SV=2	98.6089	0.779191	5	0
Q9D7B7	Probable glutathione peroxidase 8 OS=Mus musculus GN=Gpx8 PE=2 SV=1	97.6524	NA	1	0
Q9D7M1	Glucose-induced degradation protein 8 homolog OS=Mus musculus GN=Gid8 PE=2 SV=1	98.6933	NA	1	0
Q9D7N3	28S ribosomal protein S9, mitochondrial OS=Mus musculus GN=Mrps9 PE=2 SV=3	86.7254	29.5086	9	0
Q9D7N9	Adipocyte plasma membrane-associated protein OS=Mus musculus GN=Apmap PE=1 SV=1	97.9602	1.36756	9	0
Q9D7S7	60S ribosomal protein L22-like 1 OS=Mus musculus GN=Rpl22l1 PE=1 SV=1	97.0162	0.932962	5	0
Q9D832	DnaJ homolog subfamily B member 4 OS=Mus musculus GN=Dnajb4 PE=2 SV=1	94.6212	3.58863	5	0
Q9D855	Cytochrome b-c1 complex subunit 7 OS=Mus musculus GN=Uqcrb PE=1 SV=3	92.1101	25.5849	14	0
Q9D880	Mitochondrial import inner membrane translocase subunit TIM50 OS=Mus musculus GN=Timm50 PE=1 SV=1	98.9061	0.942527	6	0
Q9D898	Actin-related protein 2/3 complex subunit 5-like protein OS=Mus musculus GN=Arpc5l PE=1 SV=1	45.664	NA	1	0
Q9D8B3	Charged multivesicular body protein 4b OS=Mus musculus GN=Chmp4b PE=1 SV=2	95.9122	1.56874	2	0
Q9D8E6	60S ribosomal protein L4 OS=Mus musculus GN=Rpl4 PE=1 SV=3	97.6676	1.86162	19	0
Q9D8N0	Elongation factor 1-gamma OS=Mus musculus GN=Eef1g PE=1 SV=3	97.9681	0.980086	4	0
Q9D8S9	BolA-like protein 1 OS=Mus musculus GN=Bola1 PE=1 SV=1	96.0566	4.99938	2	0
Q9D8T7	SRA stem-loop-interacting RNA-binding protein, mitochondrial OS=Mus musculus GN=Slirp PE=1 SV=2	97.8531	2.0639	7	0
Q9D8V0	Minor histocompatibility antigen H13 OS=Mus musculus GN=Hm13 PE=1 SV=1	99.0752	0.520893	3	0
Q9D8W5	26S proteasome non-ATPase regulatory subunit 12 OS=Mus musculus GN=Psmd12 PE=1 SV=4	95.1365	1.77558	3	0
Q9D8Y1	Transmembrane protein 126A OS=Mus musculus GN=Tmem126a PE=2 SV=1	98.1006	1.4289	2	0
Q9D964	Glycine amidinotransferase, mitochondrial OS=Mus musculus GN=Gatm PE=1 SV=1	97.9954	2.025	16	0
Q9DAS9	Guanine nucleotide-binding protein G(I)/G(S)/G(O) subunit gamma-12 OS=Mus musculus GN=Gng12 PE=1 SV=3	98.1547	0.876055	2	0
Q9DAV9	Trimeric intracellular cation channel type B OS=Mus musculus GN=Tmem38b PE=2 SV=1	95.9315	3.231	5	0
Q9DAW9	Calponin-3 OS=Mus musculus GN=Cnn3 PE=1 SV=1	67.7995	48.2091	6	0
Q9DB05	Alpha-soluble NSF attachment protein OS=Mus musculus GN=Napa PE=1 SV=1	92.0137	18.1	9	0
Q9DB15	39S ribosomal protein L12, mitochondrial OS=Mus musculus GN=Mrpl12 PE=1 SV=2	97.3523	2.19059	8	0
Q9DB20	ATP synthase subunit O, mitochondrial OS=Mus musculus GN=Atp5o PE=1 SV=1	97.1999	4.22685	16	0
Q9DB25	Dolichyl-phosphate beta-glucosyltransferase OS=Mus musculus GN=Alg5 PE=2 SV=1	98.4562	NA	1	0
Q9DB27	Malignant T-cell-amplified sequence 1 OS=Mus musculus GN=Mcts1 PE=2 SV=1	96.6683	0.0548443	2	0
Q9DB70	FUN14 domain-containing protein 1 OS=Mus musculus GN=Fundc1 PE=2 SV=1	97.1407	2.98119	2	0
Q9DB73	NADH-cytochrome b5 reductase 1 OS=Mus musculus GN=Cyb5r1 PE=2 SV=1	97.5208	2.12289	8	0
Q9DB77	Cytochrome b-c1 complex subunit 2, mitochondrial OS=Mus musculus GN=Uqcrc2 PE=1 SV=1	97.8752	1.15368	18	0
Q9DBD5	Proline-, glutamic acid- and leucine-rich protein 1 OS=Mus musculus GN=Pelp1 PE=1 SV=2	94.4127	5.92705	9	0
Q9DBE8	Alpha-1,3/1,6-mannosyltransferase ALG2 OS=Mus musculus GN=Alg2 PE=2 SV=2	96.9359	2.10306	3	0
Q9DBG5	Perilipin-3 OS=Mus musculus GN=Plin3 PE=1 SV=1	96.4548	3.50284	3	0
Q9DBG7	Signal recognition particle receptor subunit alpha OS=Mus musculus GN=Srpr PE=1 SV=1	73.8122	38.2975	10	0
Q9DBH5	Vesicular integral-membrane protein VIP36 OS=Mus musculus GN=Lman2 PE=2 SV=2	97.0036	2.95031	7	0
Q9DBJ3	Brain-specific angiogenesis inhibitor 1-associated protein 2-like protein 1 OS=Mus musculus GN=Baiap2l1 PE=1 SV=1	97.7938	NA	1	0
Q9DBL1	Short/branched chain specific acyl-CoA dehydrogenase, mitochondrial OS=Mus musculus GN=Acadsb PE=1 SV=1	98.4384	0.834364	5	0
Q9DBN5	Lon protease homolog 2, peroxisomal OS=Mus musculus GN=Lonp2 PE=2 SV=1	98.0878	2.7778	4	0
Q9DBR7	Protein phosphatase 1 regulatory subunit 12A OS=Mus musculus GN=Ppp1r12a PE=1 SV=2	53.7932	62.0654	2	0
Q9DBS1	Transmembrane protein 43 OS=Mus musculus GN=Tmem43 PE=1 SV=1	98.1016	1.22058	16	0
Q9DBY8	Nuclear valosin-containing protein-like OS=Mus musculus GN=Nvl PE=1 SV=1	91.6661	11.5864	5	0
Q9DC23	DnaJ homolog subfamily C member 10 OS=Mus musculus GN=Dnajc10 PE=1 SV=2	97.7724	2.38015	9	0
Q9DC29	ATP-binding cassette sub-family B member 6, mitochondrial OS=Mus musculus GN=Abcb6 PE=1 SV=1	97.9154	NA	1	0
Q9DC50	Peroxisomal carnitine O-octanoyltransferase OS=Mus musculus GN=Crot PE=1 SV=1	89.06	14.1906	2	0
Q9DC51	Guanine nucleotide-binding protein G(k) subunit alpha OS=Mus musculus GN=Gnai3 PE=1 SV=3	97.2309	3.32461	4	0
Q9DC61	Mitochondrial-processing peptidase subunit alpha OS=Mus musculus GN=Pmpca PE=1 SV=1	96.2259	2.90859	13	0
Q9DC69	NADH dehydrogenase [ubiquinone] 1 alpha subcomplex subunit 9, mitochondrial OS=Mus musculus GN=Ndufa9 PE=1 SV=2	98.2593	1.72401	19	0
Q9DC70	NADH dehydrogenase [ubiquinone] iron-sulfur protein 7, mitochondrial OS=Mus musculus GN=Ndufs7 PE=1 SV=1	98.1335	2.36601	4	0
Q9DC71	28S ribosomal protein S15, mitochondrial OS=Mus musculus GN=Mrps15 PE=2 SV=2	97.7699	2.21169	4	0
Q9DCA2	28S ribosomal protein S11, mitochondrial OS=Mus musculus GN=Mrps11 PE=2 SV=2	97.3837	1.17996	3	0
Q9DCF9	Translocon-associated protein subunit gamma OS=Mus musculus GN=Ssr3 PE=1 SV=1	98.2676	1.99763	3	0
Q9DCI9	39S ribosomal protein L32, mitochondrial OS=Mus musculus GN=Mrpl32 PE=2 SV=1	99.4327	0.292225	2	0
Q9DCJ5	NADH dehydrogenase [ubiquinone] 1 alpha subcomplex subunit 8 OS=Mus musculus GN=Ndufa8 PE=1 SV=3	96.2601	2.63762	4	0
Q9DCM0	Persulfide dioxygenase ETHE1, mitochondrial OS=Mus musculus GN=Ethe1 PE=1 SV=2	90.0125	17.2224	5	0
Q9DCN2	NADH-cytochrome b5 reductase 3 OS=Mus musculus GN=Cyb5r3 PE=1 SV=3	97.3353	5.43557	31	0
Q9DCS3	Trans-2-enoyl-CoA reductase, mitochondrial OS=Mus musculus GN=Mecr PE=1 SV=2	97.5711	1.53444	9	0
Q9DCS9	NADH dehydrogenase [ubiquinone] 1 beta subcomplex subunit 10 OS=Mus musculus GN=Ndufb10 PE=1 SV=3	97.8879	1.20955	7	0
Q9DCT2	NADH dehydrogenase [ubiquinone] iron-sulfur protein 3, mitochondrial OS=Mus musculus GN=Ndufs3 PE=1 SV=2	98.4432	1.19828	9	0
Q9DCT5	Stromal cell-derived factor 2 OS=Mus musculus GN=Sdf2 PE=2 SV=1	98.2515	1.32279	6	0
Q9DCT8	Cysteine-rich protein 2 OS=Mus musculus GN=Crip2 PE=1 SV=1	99.684	NA	1	0
Q9DCU6	39S ribosomal protein L4, mitochondrial OS=Mus musculus GN=Mrpl4 PE=2 SV=1	96.94	5.09653	4	0
Q9DCV4	Regulator of microtubule dynamics protein 1 OS=Mus musculus GN=Rmdn1 PE=1 SV=2	97.3616	2.98059	6	0
Q9DCW4	Electron transfer flavoprotein subunit beta OS=Mus musculus GN=Etfb PE=1 SV=3	98.3261	1.06937	10	0
Q9DCX2	ATP synthase subunit d, mitochondrial OS=Mus musculus GN=Atp5h PE=1 SV=3	90.8272	24.2208	29	0
Q9EP69	Phosphatidylinositide phosphatase SAC1 OS=Mus musculus GN=Sacm1l PE=2 SV=1	85.69	29.8446	9	0
Q9EP71	Ankycorbin OS=Mus musculus GN=Rai14 PE=1 SV=1	98.3845	NA	1	0
Q9EP72	ER membrane protein complex subunit 7 OS=Mus musculus GN=Emc7 PE=2 SV=1	97.1937	2.19451	3	0
Q9EPE9	Manganese-transporting ATPase 13A1 OS=Mus musculus GN=Atp13a1 PE=2 SV=2	94.8311	10.9125	11	0
Q9EPL8	Importin-7 OS=Mus musculus GN=Ipo7 PE=1 SV=2	96.3507	2.06657	3	0
Q9EPL9	Peroxisomal acyl-coenzyme A oxidase 3 OS=Mus musculus GN=Acox3 PE=1 SV=2	90.8267	25.5613	12	0
Q9EPR5	VPS10 domain-containing receptor SorCS2 OS=Mus musculus GN=Sorcs2 PE=1 SV=2	97.8418	1.97629	29	0
Q9EPU0	Regulator of nonsense transcripts 1 OS=Mus musculus GN=Upf1 PE=1 SV=2	96.6526	3.65867	9	0
Q9EPU4	Cleavage and polyadenylation specificity factor subunit 1 OS=Mus musculus GN=Cpsf1 PE=1 SV=1	84.8983	37.3571	7	0
Q9EQ20	Methylmalonate-semialdehyde dehydrogenase [acylating], mitochondrial OS=Mus musculus GN=Aldh6a1 PE=1 SV=1	96.6792	2.77016	5	0
Q9EQ61	Pescadillo homolog OS=Mus musculus GN=Pes1 PE=1 SV=1	97.6596	3.07115	3	0
Q9EQ80	Putative GTP cyclohydrolase 1 type 2 Nif3l1 OS=Mus musculus GN=Nif3l1 PE=1 SV=4	99.555	NA	1	0
Q9EQH2	Endoplasmic reticulum aminopeptidase 1 OS=Mus musculus GN=Erap1 PE=2 SV=2	85.9705	25.1465	4	0
Q9EQI8	39S ribosomal protein L46, mitochondrial OS=Mus musculus GN=Mrpl46 PE=1 SV=1	97.572	2.68052	6	0
Q9EQJ0	Two pore calcium channel protein 1 OS=Mus musculus GN=Tpcn1 PE=2 SV=1	98.1339	1.56462	3	0
Q9EQQ2	Protein YIPF5 OS=Mus musculus GN=Yipf5 PE=2 SV=1	93.4431	NA	1	0
Q9ER00	Syntaxin-12 OS=Mus musculus GN=Stx12 PE=1 SV=1	99.145	1.19692	4	0
Q9ER38	Torsin-3A OS=Mus musculus GN=Tor3a PE=1 SV=2	95.7363	3.05784	3	0
Q9ER41	Torsin-1B OS=Mus musculus GN=Tor1b PE=1 SV=2	90.0151	14.1488	3	0
Q9ER64	Oxysterol-binding protein-related protein 5 OS=Mus musculus GN=Osbpl5 PE=2 SV=3	98.9413	NA	1	0
Q9ER88	28S ribosomal protein S29, mitochondrial OS=Mus musculus GN=Dap3 PE=2 SV=1	98.4353	1.1165	5	0
Q9ERD7	Tubulin beta-3 chain OS=Mus musculus GN=Tubb3 PE=1 SV=1	95.6427	11.3551	38	0
Q9ERE7	LDLR chaperone MESD OS=Mus musculus GN=Mesdc2 PE=1 SV=1	98.2909	0.787436	6	0
Q9ERG2	Striatin-3 OS=Mus musculus GN=Strn3 PE=1 SV=1	9.97194	NA	1	0
Q9ERI6	Retinol dehydrogenase 14 OS=Mus musculus GN=Rdh14 PE=2 SV=1	95.7558	4.3473	2	0
Q9ERK4	Exportin-2 OS=Mus musculus GN=Cse1l PE=2 SV=1	96.6743	3.2029	4	0
Q9ERR7	15 kDa selenoprotein OS=Mus musculus GN=Sep15 PE=1 SV=3	95.802	NA	1	0
Q9ERS2	NADH dehydrogenase [ubiquinone] 1 alpha subcomplex subunit 13 OS=Mus musculus GN=Ndufa13 PE=1 SV=3	98.7757	0.734161	5	0
Q9ERU9	E3 SUMO-protein ligase RanBP2 OS=Mus musculus GN=Ranbp2 PE=1 SV=2	95.3325	3.21724	5	0
Q9ES83	Blood vessel epicardial substance OS=Mus musculus GN=Bves PE=1 SV=1	97.6267	1.90352	2	0
Q9ES97	Reticulon-3 OS=Mus musculus GN=Rtn3 PE=1 SV=2	96.5753	3.73776	3	0
Q9ESW4	Acylglycerol kinase, mitochondrial OS=Mus musculus GN=Agk PE=1 SV=1	95.8512	3.163	5	0
Q9ET30	Transmembrane 9 superfamily member 3 OS=Mus musculus GN=Tm9sf3 PE=1 SV=1	97.8909	1.43162	5	0
Q9JHI5	Isovaleryl-CoA dehydrogenase, mitochondrial OS=Mus musculus GN=Ivd PE=1 SV=1	94.4366	10.181	15	0
Q9JHI7	Exosome complex component RRP45 OS=Mus musculus GN=Exosc9 PE=2 SV=1	96.0026	4.45287	2	0
Q9JHP7	KDEL motif-containing protein 1 OS=Mus musculus GN=Kdelc1 PE=1 SV=1	97.7623	2.20935	2	0
Q9JHS4	ATP-dependent Clp protease ATP-binding subunit clpX-like, mitochondrial OS=Mus musculus GN=Clpx PE=1 SV=2	96.992	2.86864	6	0
Q9JHU4	Cytoplasmic dynein 1 heavy chain 1 OS=Mus musculus GN=Dync1h1 PE=1 SV=2	96.3012	5.29959	66	0
Q9JI39	ATP-binding cassette sub-family B member 10, mitochondrial OS=Mus musculus GN=Abcb10 PE=1 SV=1	95.2361	3.27826	6	0
Q9JI91	Alpha-actinin-2 OS=Mus musculus GN=Actn2 PE=1 SV=2	98.359	1.31985	3	0
Q9JIF7	Coatomer subunit beta OS=Mus musculus GN=Copb1 PE=1 SV=1	98.7826	0.923804	3	0
Q9JIK5	Nucleolar RNA helicase 2 OS=Mus musculus GN=Ddx21 PE=1 SV=3	97.1541	3.21855	17	0
Q9JIK9	28S ribosomal protein S34, mitochondrial OS=Mus musculus GN=Mrps34 PE=2 SV=1	96.3027	3.07821	5	0
Q9JIQ3	Diablo homolog, mitochondrial OS=Mus musculus GN=Diablo PE=1 SV=2	96.2956	0.449798	2	0
Q9JIW9	Ras-related protein Ral-B OS=Mus musculus GN=Ralb PE=2 SV=1	96.9586	2.56035	5	0
Q9JJ28	Protein flightless-1 homolog OS=Mus musculus GN=Flii PE=1 SV=1	99.1714	0.241587	4	0
Q9JJA4	Ribosome biogenesis protein WDR12 OS=Mus musculus GN=Wdr12 PE=2 SV=1	97.1967	2.67306	5	0
Q9JJE7	Fatty acid desaturase 3 OS=Mus musculus GN=Fads3 PE=2 SV=2	97.6548	2.62521	3	0
Q9JJI8	60S ribosomal protein L38 OS=Mus musculus GN=Rpl38 PE=2 SV=3	98.1859	1.40022	6	0
Q9JJL8	Serine--tRNA ligase, mitochondrial OS=Mus musculus GN=Sars2 PE=1 SV=2	95.4229	3.09512	7	0
Q9JJZ2	Tubulin alpha-8 chain OS=Mus musculus GN=Tuba8 PE=1 SV=1	97.0209	2.1392	19	0
Q9JK92	Heat shock protein beta-8 OS=Mus musculus GN=Hspb8 PE=1 SV=1	98.3467	1.20398	3	0
Q9JKB3	Y-box-binding protein 3 OS=Mus musculus GN=Ybx3 PE=1 SV=2	98.0622	0.836439	7	0
Q9JKF7	39S ribosomal protein L39, mitochondrial OS=Mus musculus GN=Mrpl39 PE=2 SV=4	93.1871	12.8137	7	0
Q9JKR6	Hypoxia up-regulated protein 1 OS=Mus musculus GN=Hyou1 PE=1 SV=1	94.3929	18.3607	28	0
Q9JKV1	Proteasomal ubiquitin receptor ADRM1 OS=Mus musculus GN=Adrm1 PE=1 SV=2	95.6999	3.29999	3	0
Q9JL56	Glycerophosphodiester phosphodiesterase 1 OS=Mus musculus GN=Gde1 PE=2 SV=1	95.4645	NA	1	0
Q9JLR1	Protein transport protein Sec61 subunit alpha isoform 2 OS=Mus musculus GN=Sec61a2 PE=2 SV=3	98.9309	0.434458	5	0
Q9JLZ3	Methylglutaconyl-CoA hydratase, mitochondrial OS=Mus musculus GN=Auh PE=1 SV=1	97.3672	3.89465	4	0
Q9JM76	Actin-related protein 2/3 complex subunit 3 OS=Mus musculus GN=Arpc3 PE=1 SV=3	97.3687	1.37656	3	0
Q9QUI0	Transforming protein RhoA OS=Mus musculus GN=Rhoa PE=1 SV=1	98.0164	2.93705	6	0
Q9QUJ7	Long-chain-fatty-acid--CoA ligase 4 OS=Mus musculus GN=Acsl4 PE=2 SV=2	91.9762	23.9752	15	0
Q9QUM9	Proteasome subunit alpha type-6 OS=Mus musculus GN=Psma6 PE=1 SV=1	97.3803	1.2698	4	0
Q9QWR8	Alpha-N-acetylgalactosaminidase OS=Mus musculus GN=Naga PE=2 SV=2	95.7158	NA	1	0
Q9QX47	Protein SON OS=Mus musculus GN=Son PE=1 SV=2	98.9482	0.842556	7	0
Q9QX60	Deoxyguanosine kinase, mitochondrial OS=Mus musculus GN=Dguok PE=2 SV=3	94.6525	3.48774	3	0
Q9QXB9	Developmentally-regulated GTP-binding protein 2 OS=Mus musculus GN=Drg2 PE=1 SV=1	95.8229	3.11316	6	0
Q9QXK3	Coatomer subunit gamma-2 OS=Mus musculus GN=Copg2 PE=2 SV=1	97.6348	1.66939	2	0
Q9QXS1	Plectin OS=Mus musculus GN=Plec PE=1 SV=3	95.5575	12.6999	188	0
Q9QXS6	Drebrin OS=Mus musculus GN=Dbn1 PE=1 SV=4	96.7658	2.24387	5	0
Q9QXT0	Protein canopy homolog 2 OS=Mus musculus GN=Cnpy2 PE=1 SV=1	97.8003	1.66068	3	0
Q9QXY6	EH domain-containing protein 3 OS=Mus musculus GN=Ehd3 PE=1 SV=2	95.7967	3.17077	7	0
Q9QY76	Vesicle-associated membrane protein-associated protein B OS=Mus musculus GN=Vapb PE=2 SV=3	98.2125	2.57334	5	0
Q9QYA2	Mitochondrial import receptor subunit TOM40 homolog OS=Mus musculus GN=Tomm40 PE=1 SV=3	96.7182	1.83121	6	0
Q9QYB1	Chloride intracellular channel protein 4 OS=Mus musculus GN=Clic4 PE=1 SV=3	94.5359	5.85885	2	0
Q9QYE6	Golgin subfamily A member 5 OS=Mus musculus GN=Golga5 PE=1 SV=2	90.7354	23.0576	8	0
Q9QYJ0	DnaJ homolog subfamily A member 2 OS=Mus musculus GN=Dnaja2 PE=1 SV=1	91.2233	24.2153	10	0
Q9QYR6	Microtubule-associated protein 1A OS=Mus musculus GN=Map1a PE=1 SV=2	99.6165	0.0827998	2	0
Q9QYR9	Acyl-coenzyme A thioesterase 2, mitochondrial OS=Mus musculus GN=Acot2 PE=1 SV=2	98.0331	1.43053	10	0
Q9QYS9	Protein quaking OS=Mus musculus GN=Qki PE=1 SV=1	98.9913	NA	1	0
Q9QZ23	NFU1 iron-sulfur cluster scaffold homolog, mitochondrial OS=Mus musculus GN=Nfu1 PE=1 SV=2	97.8903	1.11105	4	0
Q9QZA0	Carbonic anhydrase 5B, mitochondrial OS=Mus musculus GN=Ca5b PE=2 SV=2	95.8061	3.59575	2	0
Q9QZD8	Mitochondrial dicarboxylate carrier OS=Mus musculus GN=Slc25a10 PE=1 SV=2	97.6419	2.98568	5	0
Q9QZD9	Eukaryotic translation initiation factor 3 subunit I OS=Mus musculus GN=Eif3i PE=1 SV=1	94.0558	8.0539	4	0
Q9QZE5	Coatomer subunit gamma-1 OS=Mus musculus GN=Copg1 PE=2 SV=1	80.3212	34.9273	6	0
Q9QZF2	Glypican-1 OS=Mus musculus GN=Gpc1 PE=1 SV=1	96.4262	3.39649	13	0
Q9QZH6	Evolutionarily conserved signaling intermediate in Toll pathway, mitochondrial OS=Mus musculus GN=Ecsit PE=1 SV=2	94.361	NA	1	0
Q9QZQ8	Core histone macro-H2A.1 OS=Mus musculus GN=H2afy PE=1 SV=3	97.0009	4.59192	15	0
Q9R045	Angiopoietin-related protein 2 OS=Mus musculus GN=Angptl2 PE=2 SV=2	94.1682	NA	1	0
Q9R099	Transducin beta-like protein 2 OS=Mus musculus GN=Tbl2 PE=2 SV=2	98.4264	1.54585	3	0
Q9R0A0	Peroxisomal membrane protein PEX14 OS=Mus musculus GN=Pex14 PE=1 SV=1	98.3261	2.20758	2	0
Q9R0B9	Procollagen-lysine,2-oxoglutarate 5-dioxygenase 2 OS=Mus musculus GN=Plod2 PE=1 SV=2	98.2292	1.91165	15	0
Q9R0E1	Procollagen-lysine,2-oxoglutarate 5-dioxygenase 3 OS=Mus musculus GN=Plod3 PE=1 SV=1	95.1672	6.41308	13	0
Q9R0E2	Procollagen-lysine,2-oxoglutarate 5-dioxygenase 1 OS=Mus musculus GN=Plod1 PE=1 SV=1	99.0138	1.15234	6	0
Q9R0H0	Peroxisomal acyl-coenzyme A oxidase 1 OS=Mus musculus GN=Acox1 PE=1 SV=5	98.681	1.84034	12	0
Q9R0N0	Galactokinase OS=Mus musculus GN=Galk1 PE=2 SV=2	91.6112	0.786882	2	0
Q9R0P5	Destrin OS=Mus musculus GN=Dstn PE=1 SV=3	97.4886	1.8677	3	0
Q9R0X4	Acyl-coenzyme A thioesterase 9, mitochondrial OS=Mus musculus GN=Acot9 PE=1 SV=1	98.2679	1.52948	20	0
Q9R0Y5	Adenylate kinase isoenzyme 1 OS=Mus musculus GN=Ak1 PE=1 SV=1	96.7429	3.27765	8	0
Q9R112	Sulfide:quinone oxidoreductase, mitochondrial OS=Mus musculus GN=Sqrdl PE=1 SV=3	97.2068	2.32779	7	0
Q9R118	Serine protease HTRA1 OS=Mus musculus GN=Htra1 PE=1 SV=2	98.229	1.75473	9	0
Q9R190	Metastasis-associated protein MTA2 OS=Mus musculus GN=Mta2 PE=1 SV=1	97.2474	2.05667	5	0
Q9R1C7	Pre-mRNA-processing factor 40 homolog A OS=Mus musculus GN=Prpf40a PE=1 SV=1	98.2122	1.43881	6	0
Q9R1P3	Proteasome subunit beta type-2 OS=Mus musculus GN=Psmb2 PE=1 SV=1	99.2442	0.322063	5	0
Q9R1S3	GPI ethanolamine phosphate transferase 1 OS=Mus musculus GN=Pign PE=2 SV=2	92.8337	0.280319	2	0
Q9R1T2	SUMO-activating enzyme subunit 1 OS=Mus musculus GN=Sae1 PE=1 SV=1	97.7082	0.581648	3	0
Q9R1T4	Septin-6 OS=Mus musculus GN=Sept6 PE=1 SV=4	93.9038	NA	1	0
Q9R1Z8	Vinexin OS=Mus musculus GN=Sorbs3 PE=1 SV=1	95.8624	3.21502	3	0
Q9R205	Heterogenous nuclear ribonucleoprotein U (Fragment) OS=Mus musculus GN=hnRNP U PE=4 SV=1	99.0871	0.226996	3	0
Q9WTI7	Unconventional myosin-Ic OS=Mus musculus GN=Myo1c PE=1 SV=2	97.7076	2.09186	19	0
Q9WTP6	Adenylate kinase 2, mitochondrial OS=Mus musculus GN=Ak2 PE=1 SV=5	96.8304	3.7005	9	0
Q9WTP7	GTP:AMP phosphotransferase AK3, mitochondrial OS=Mus musculus GN=Ak3 PE=1 SV=3	93.1838	18.6069	20	0
Q9WTQ8	Mitochondrial import inner membrane translocase subunit Tim23 OS=Mus musculus GN=Timm23 PE=2 SV=1	99.1658	0.216256	2	0
Q9WTX2	Interferon-inducible double-stranded RNA-dependent protein kinase activator A OS=Mus musculus GN=Prkra PE=1 SV=1	99.1434	NA	1	0
Q9WTX5	S-phase kinase-associated protein 1 OS=Mus musculus GN=Skp1 PE=1 SV=3	97.1947	1.37392	2	0
Q9WUA3	ATP-dependent 6-phosphofructokinase, platelet type OS=Mus musculus GN=Pfkp PE=1 SV=1	85.0931	31.7204	8	0
Q9WUM3	Coronin-1B OS=Mus musculus GN=Coro1b PE=1 SV=1	92.8902	NA	1	0
Q9WUM5	Succinyl-CoA ligase [ADP/GDP-forming] subunit alpha, mitochondrial OS=Mus musculus GN=Suclg1 PE=1 SV=4	97.8723	1.72962	13	0
Q9WUP7	Ubiquitin carboxyl-terminal hydrolase isozyme L5 OS=Mus musculus GN=Uchl5 PE=1 SV=2	75.7136	41.0115	4	0
Q9WUR2	Enoyl-CoA delta isomerase 2, mitochondrial OS=Mus musculus GN=Eci2 PE=1 SV=2	97.2101	2.491	9	0
Q9WUR9	Adenylate kinase 4, mitochondrial OS=Mus musculus GN=Ak4 PE=1 SV=1	94.9358	1.99985	3	0
Q9WV27	Sodium/potassium-transporting ATPase subunit alpha-4 OS=Mus musculus GN=Atp1a4 PE=1 SV=3	98.6167	0.53545	4	0
Q9WV55	Vesicle-associated membrane protein-associated protein A OS=Mus musculus GN=Vapa PE=1 SV=2	97.7744	1.32066	12	0
Q9WV91	Prostaglandin F2 receptor negative regulator OS=Mus musculus GN=Ptgfrn PE=1 SV=2	99.2471	0.679622	5	0
Q9WV92	Band 4.1-like protein 3 OS=Mus musculus GN=Epb41l3 PE=1 SV=1	98.1942	0.574871	5	0
Q9WV98	Mitochondrial import inner membrane translocase subunit Tim9 OS=Mus musculus GN=Timm9 PE=1 SV=1	97.6251	0.260132	2	0
Q9WVA3	Mitotic checkpoint protein BUB3 OS=Mus musculus GN=Bub3 PE=2 SV=2	95.756	3.18473	3	0
Q9WVA4	Transgelin-2 OS=Mus musculus GN=Tagln2 PE=1 SV=4	95.0016	4.37693	6	0
Q9WVE8	Protein kinase C and casein kinase substrate in neurons protein 2 OS=Mus musculus GN=Pacsin2 PE=1 SV=1	97.5031	2.61628	4	0
Q9WVJ2	26S proteasome non-ATPase regulatory subunit 13 OS=Mus musculus GN=Psmd13 PE=1 SV=1	96.7305	3.23093	8	0
Q9WVL0	Maleylacetoacetate isomerase OS=Mus musculus GN=Gstz1 PE=1 SV=1	90.1153	NA	1	0
Q9WVL3	Solute carrier family 12 member 7 OS=Mus musculus GN=Slc12a7 PE=1 SV=1	98.0302	1.53961	2	0
Q9WVR4	Fragile X mental retardation syndrome-related protein 2 OS=Mus musculus GN=Fxr2 PE=1 SV=1	97.303	1.53225	2	0
Q9Z0H4	CUGBP Elav-like family member 2 OS=Mus musculus GN=Celf2 PE=1 SV=1	96.8463	1.51386	3	0
Q9Z0M6	CD97 antigen OS=Mus musculus GN=Cd97 PE=1 SV=2	97.9583	1.43889	7	0
Q9Z0N2	Eukaryotic translation initiation factor 2 subunit 3, Y-linked OS=Mus musculus GN=Eif2s3y PE=2 SV=2	98.302	2.18883	6	0
Q9Z0S9	Prenylated Rab acceptor protein 1 OS=Mus musculus GN=Rabac1 PE=1 SV=1	93.1619	NA	1	0
Q9Z0W3	Nuclear pore complex protein Nup160 OS=Mus musculus GN=Nup160 PE=1 SV=2	95.9212	2.91932	14	0
Q9Z0X1	Apoptosis-inducing factor 1, mitochondrial OS=Mus musculus GN=Aifm1 PE=1 SV=1	90.7415	21.0814	11	0
Q9Z110	Delta-1-pyrroline-5-carboxylate synthase OS=Mus musculus GN=Aldh18a1 PE=1 SV=2	97.2722	2.37636	28	0
Q9Z1E4	Glycogen [starch] synthase, muscle OS=Mus musculus GN=Gys1 PE=1 SV=2	73.8037	42.8357	3	0
Q9Z1F9	SUMO-activating enzyme subunit 2 OS=Mus musculus GN=Uba2 PE=1 SV=1	98.1788	NA	1	0
Q9Z1J3	Cysteine desulfurase, mitochondrial OS=Mus musculus GN=Nfs1 PE=2 SV=3	97.7482	1.97969	10	0
Q9Z1M8	Protein Red OS=Mus musculus GN=Ik PE=1 SV=2	97.454	3.14782	3	0
Q9Z1N5	Spliceosome RNA helicase Ddx39b OS=Mus musculus GN=Ddx39b PE=1 SV=1	98.8688	0.777979	5	0
Q9Z1P6	NADH dehydrogenase [ubiquinone] 1 alpha subcomplex subunit 7 OS=Mus musculus GN=Ndufa7 PE=1 SV=3	97.7352	0.928799	4	0
Q9Z1Q2	Abhydrolase domain-containing protein 16A OS=Mus musculus GN=Abhd16a PE=1 SV=3	95.9597	1.8111	2	0
Q9Z1T1	AP-3 complex subunit beta-1 OS=Mus musculus GN=Ap3b1 PE=1 SV=2	95.3361	8.47937	5	0
Q9Z1W8	Potassium-transporting ATPase alpha chain 2 OS=Mus musculus GN=Atp12a PE=1 SV=3	98.4954	0.584639	3	0
Q9Z1Z0	General vesicular transport factor p115 OS=Mus musculus GN=Uso1 PE=1 SV=2	99.2184	0.49283	2	0
Q9Z1Z2	Serine-threonine kinase receptor-associated protein OS=Mus musculus GN=Strap PE=1 SV=2	96.2974	NA	1	0
Q9Z204	Heterogeneous nuclear ribonucleoproteins C1/C2 OS=Mus musculus GN=Hnrnpc PE=1 SV=1	98.3192	2.01767	10	0
Q9Z247	Peptidyl-prolyl cis-trans isomerase FKBP9 OS=Mus musculus GN=Fkbp9 PE=1 SV=1	98.5851	1.03197	3	0
Q9Z277	Tyrosine-protein kinase BAZ1B OS=Mus musculus GN=Baz1b PE=1 SV=2	86.104	31.2752	7	0
Q9Z2A7	Diacylglycerol O-acyltransferase 1 OS=Mus musculus GN=Dgat1 PE=1 SV=1	54.3832	64.1058	2	0
Q9Z2B9	Ribosomal protein S6 kinase alpha-4 OS=Mus musculus GN=Rps6ka4 PE=1 SV=2	84.2161	22.0564	3	0
Q9Z2D6	Methyl-CpG-binding protein 2 OS=Mus musculus GN=Mecp2 PE=1 SV=1	94.5648	3.98942	3	0
Q9Z2E1	Methyl-CpG-binding domain protein 2 OS=Mus musculus GN=Mbd2 PE=2 SV=2	88.6566	8.55247	2	0
Q9Z2I0	LETM1 and EF-hand domain-containing protein 1, mitochondrial OS=Mus musculus GN=Letm1 PE=2 SV=1	96.5707	5.16505	19	0
Q9Z2I8	Succinyl-CoA ligase [GDP-forming] subunit beta, mitochondrial OS=Mus musculus GN=Suclg2 PE=1 SV=3	88.9089	29.1029	11	0
Q9Z2I9	Succinyl-CoA ligase [ADP-forming] subunit beta, mitochondrial OS=Mus musculus GN=Sucla2 PE=1 SV=2	98.0467	2.06201	16	0
Q9Z2L6	Multiple inositol polyphosphate phosphatase 1 OS=Mus musculus GN=Minpp1 PE=1 SV=3	98.02	1.65542	2	0
Q9Z2X1	Heterogeneous nuclear ribonucleoprotein F OS=Mus musculus GN=Hnrnpf PE=1 SV=3	87.1494	30.5891	9	0
Q9Z2Z6	Mitochondrial carnitine/acylcarnitine carrier protein OS=Mus musculus GN=Slc25a20 PE=1 SV=1	97.3063	3.22169	5	0
Q9Z315	U4/U6.U5 tri-snRNP-associated protein 1 OS=Mus musculus GN=Sart1 PE=2 SV=1	96.2568	5.33889	3	0
Q9Z329	Inositol 1,4,5-trisphosphate receptor type 2 OS=Mus musculus GN=Itpr2 PE=1 SV=4	97.9123	2.79854	2	0
A2AGL3	Ryanodine receptor 3 OS=Mus musculus GN=Ryr3 PE=1 SV=1	71.4936	19.035	4	1
A2AIL4	NADH dehydrogenase (ubiquinone) complex I, assembly factor 6 OS=Mus musculus GN=Ndufaf6 PE=3 SV=1	95.027	0.188365	2	1
A2AIV2	Protein virilizer homolog OS=Mus musculus GN=Kiaa1429 PE=1 SV=1	33.8365	3.39483	3	1
A2AMM0	Muscle-related coiled-coil protein OS=Mus musculus GN=Murc PE=2 SV=1	53.1624	10.9854	4	1
A2AN08	E3 ubiquitin-protein ligase UBR4 OS=Mus musculus GN=Ubr4 PE=1 SV=1	93.2369	3.74351	10	1
A2APY7	NADH dehydrogenase [ubiquinone] 1 alpha subcomplex assembly factor 5 OS=Mus musculus GN=Ndufaf5 PE=2 SV=1	77.3928	28.6636	5	1
A2AQ07	Tubulin beta-1 chain OS=Mus musculus GN=Tubb1 PE=1 SV=1	95.508	1.96476	5	1
A2AQP0	Myosin-7B OS=Mus musculus GN=Myh7b PE=3 SV=1	80.0326	5.03425	6	1
A2ASS6	Titin OS=Mus musculus GN=Ttn PE=1 SV=1	64.8311	11.3338	528	1
A2AUC9	Kelch-like protein 41 OS=Mus musculus GN=Klhl41 PE=1 SV=1	76.6028	6.71979	12	1
A2BE28	Ribosomal biogenesis protein LAS1L OS=Mus musculus GN=Las1l PE=1 SV=1	71.6783	16.4104	3	1
A6H611	Mitochondrial intermediate peptidase OS=Mus musculus GN=Mipep PE=2 SV=1	73.1392	16.1909	5	1
B0V2N1	Receptor-type tyrosine-protein phosphatase S OS=Mus musculus GN=Ptprs PE=1 SV=1	33.2723	15.5386	4	1
B1AZI6	THO complex subunit 2 OS=Mus musculus GN=Thoc2 PE=1 SV=1	49.891	4.96872	4	1
B2RQC6	CAD protein OS=Mus musculus GN=Cad PE=2 SV=1	93.7783	5.57486	16	1
B2RRE7	OTU domain-containing protein 4 OS=Mus musculus GN=Otud4 PE=1 SV=1	71.8784	25.2215	2	1
B2RXS4	Plexin-B2 OS=Mus musculus GN=Plxnb2 PE=1 SV=1	56.752	19.7843	21	1
B2RY56	RNA-binding protein 25 OS=Mus musculus GN=Rbm25 PE=1 SV=2	54.9211	7.32822	13	1
B7ZMP1	Probable Xaa-Pro aminopeptidase 3 OS=Mus musculus GN=Xpnpep3 PE=2 SV=1	77.4547	2.43005	8	1
B9EHN9	Zinc finger CCCH type containing 13 OS=Mus musculus GN=Zc3h13 PE=2 SV=1	34.7561	6.07251	2	1
B9EJ80	PDZ domain containing 8 OS=Mus musculus GN=Pdzd8 PE=2 SV=1	80.6617	16.9335	2	1
B9EKI3	TATA element modulatory factor OS=Mus musculus GN=Tmf1 PE=1 SV=2	24.326	15.7524	12	1
D3YXK2	Scaffold attachment factor B1 OS=Mus musculus GN=Safb PE=1 SV=2	64.351	5.01846	12	1
D3YZG8	Probable bifunctional methylenetetrahydrofolate dehydrogenase/cyclohydrolase 2 OS=Mus musculus GN=Mthfd2l PE=3 SV=1	88.2394	NA	1	1
D3Z7P3	Glutaminase kidney isoform, mitochondrial OS=Mus musculus GN=Gls PE=1 SV=1	83.243	13.2155	32	1
E0CX20	Protein BUD31 homolog OS=Mus musculus GN=Bud31 PE=4 SV=1	35.2007	NA	1	1
E0CYV9	Protein 1110002E22Rik OS=Mus musculus GN=1110002E22Rik PE=4 SV=1	40.6728	13.333	3	1
E9PZJ8	Activating signal cointegrator 1 complex subunit 3 OS=Mus musculus GN=Ascc3 PE=1 SV=1	96.8605	1.79486	2	1
E9PZQ0	Ryanodine receptor 1 OS=Mus musculus GN=Ryr1 PE=1 SV=1	59.4956	7.69309	54	1
E9Q0K6	Deoxynucleoside triphosphate triphosphohydrolase SAMHD1 OS=Mus musculus GN=Samhd1 PE=1 SV=1	72.9854	15.8866	3	1
E9Q3E1	Aldehyde dehydrogenase OS=Mus musculus GN=Aldh3b2 PE=3 SV=1	59.0837	2.19086	4	1
E9Q3L2	Protein Pi4ka OS=Mus musculus GN=Pi4ka PE=4 SV=1	93.7708	1.11257	3	1
E9Q401	Ryanodine receptor 2 OS=Mus musculus GN=Ryr2 PE=1 SV=1	79.5964	23.3622	2	1
E9Q555	E3 ubiquitin-protein ligase RNF213 OS=Mus musculus GN=Rnf213 PE=2 SV=1	94.7002	0.729877	2	1
E9Q5G3	Kinesin-like protein KIF23 OS=Mus musculus GN=Kif23 PE=1 SV=1	82.3513	NA	1	1
E9Q634	Unconventional myosin-Ie OS=Mus musculus GN=Myo1e PE=1 SV=1	84.6035	6.63003	3	1
F6ZDS4	Nucleoprotein TPR OS=Mus musculus GN=Tpr PE=1 SV=1	58.7686	18.9314	24	1
F8VPU2	FERM, RhoGEF and pleckstrin domain-containing protein 1 OS=Mus musculus GN=Farp1 PE=1 SV=1	77.3924	18.6095	6	1
F8VQB6	Unconventional myosin-X OS=Mus musculus GN=Myo10 PE=1 SV=1	52.7322	26.4628	3	1
G5E829	Plasma membrane calcium-transporting ATPase 1 OS=Mus musculus GN=Atp2b1 PE=1 SV=1	69.5485	18.2078	22	1
G5E870	E3 ubiquitin-protein ligase TRIP12 OS=Mus musculus GN=Trip12 PE=1 SV=1	44.1877	26.4073	12	1
J3QMK6	Aldehyde dehydrogenase OS=Mus musculus GN=1700055N04Rik PE=3 SV=1	59.0111	1.90428	5	1
O08528	Hexokinase-2 OS=Mus musculus GN=Hk2 PE=2 SV=1	69.1128	10.314	18	1
O08532	Voltage-dependent calcium channel subunit alpha-2/delta-1 OS=Mus musculus GN=Cacna2d1 PE=1 SV=1	69.382	11.2035	23	1
O08539	Myc box-dependent-interacting protein 1 OS=Mus musculus GN=Bin1 PE=1 SV=1	70.7577	9.775	12	1
O08547	Vesicle-trafficking protein SEC22b OS=Mus musculus GN=Sec22b PE=1 SV=3	77.8918	9.65282	9	1
O08553	Dihydropyrimidinase-related protein 2 OS=Mus musculus GN=Dpysl2 PE=1 SV=2	94.3462	3.54922	6	1
O08579	Emerin OS=Mus musculus GN=Emd PE=1 SV=1	70.175	3.26029	7	1
O08583	THO complex subunit 4 OS=Mus musculus GN=Alyref PE=1 SV=3	69.2127	14.52	17	1
O08600	Endonuclease G, mitochondrial OS=Mus musculus GN=Endog PE=2 SV=1	38.4649	3.94642	2	1
O08601	Microsomal triglyceride transfer protein large subunit OS=Mus musculus GN=Mttp PE=2 SV=2	79.5828	0.420965	2	1
O08638	Myosin-11 OS=Mus musculus GN=Myh11 PE=1 SV=1	84.14	9.43048	11	1
O08709	Peroxiredoxin-6 OS=Mus musculus GN=Prdx6 PE=1 SV=3	74.226	40.3968	5	1
O08749	Dihydrolipoyl dehydrogenase, mitochondrial OS=Mus musculus GN=Dld PE=1 SV=2	82.9468	17.9278	24	1
O08756	3-hydroxyacyl-CoA dehydrogenase type-2 OS=Mus musculus GN=Hsd17b10 PE=1 SV=4	87.0517	7.89755	11	1
O08795	Glucosidase 2 subunit beta OS=Mus musculus GN=Prkcsh PE=1 SV=1	74.4827	7.35696	14	1
O08807	Peroxiredoxin-4 OS=Mus musculus GN=Prdx4 PE=1 SV=1	90.8978	9.35863	8	1
O08912	Polypeptide N-acetylgalactosaminyltransferase 1 OS=Mus musculus GN=Galnt1 PE=1 SV=1	69.8933	22.2279	6	1
O08917	Flotillin-1 OS=Mus musculus GN=Flot1 PE=1 SV=1	83.7	7.85089	11	1
O09005	Sphingolipid delta(4)-desaturase DES1 OS=Mus musculus GN=Degs1 PE=2 SV=1	38.1704	5.42427	5	1
O09061	Proteasome subunit beta type-1 OS=Mus musculus GN=Psmb1 PE=1 SV=1	92.5969	NA	1	1
O09106	Histone deacetylase 1 OS=Mus musculus GN=Hdac1 PE=1 SV=1	64.5971	17.9949	4	1
O09111	NADH dehydrogenase [ubiquinone] 1 beta subcomplex subunit 11, mitochondrial OS=Mus musculus GN=Ndufb11 PE=1 SV=2	83.3529	7.71698	9	1
O09131	Glutathione S-transferase omega-1 OS=Mus musculus GN=Gsto1 PE=2 SV=2	98.7668	0.295222	2	1
O09161	Calsequestrin-2 OS=Mus musculus GN=Casq2 PE=1 SV=3	60.4404	7.29533	15	1
O09165	Calsequestrin-1 OS=Mus musculus GN=Casq1 PE=1 SV=3	57.9169	29.731	5	1
O09174	Alpha-methylacyl-CoA racemase OS=Mus musculus GN=Amacr PE=1 SV=4	76.8382	8.12648	20	1
O35074	Prostacyclin synthase OS=Mus musculus GN=Ptgis PE=2 SV=1	71.895	6.01702	29	1
O35114	Lysosome membrane protein 2 OS=Mus musculus GN=Scarb2 PE=1 SV=3	85.2834	6.38301	7	1
O35127	Protein C10 OS=Mus musculus GN=Grcc10 PE=2 SV=1	60.3486	16.337	3	1
O35129	Prohibitin-2 OS=Mus musculus GN=Phb2 PE=1 SV=1	88.1015	7.14188	17	1
O35143	ATPase inhibitor, mitochondrial OS=Mus musculus GN=Atpif1 PE=1 SV=2	79.0391	25.3368	6	1
O35166	Golgi SNAP receptor complex member 2 OS=Mus musculus GN=Gosr2 PE=2 SV=2	48.3221	4.55122	4	1
O35218	Cleavage and polyadenylation specificity factor subunit 2 OS=Mus musculus GN=Cpsf2 PE=1 SV=1	60.3262	16.8961	5	1
O35226	26S proteasome non-ATPase regulatory subunit 4 OS=Mus musculus GN=Psmd4 PE=1 SV=1	48.2018	NA	1	1
O35295	Transcriptional activator protein Pur-beta OS=Mus musculus GN=Purb PE=1 SV=3	79.0516	6.92689	15	1
O35326	Serine/arginine-rich splicing factor 5 OS=Mus musculus GN=Srsf5 PE=1 SV=2	55.9547	20.6589	3	1
O35405	Phospholipase D3 OS=Mus musculus GN=Pld3 PE=2 SV=1	51.011	0.9578	3	1
O35435	Dihydroorotate dehydrogenase (quinone), mitochondrial OS=Mus musculus GN=Dhodh PE=2 SV=2	80.4479	18.8316	9	1
O35459	Delta(3,5)-Delta(2,4)-dienoyl-CoA isomerase, mitochondrial OS=Mus musculus GN=Ech1 PE=1 SV=1	78.2849	5.61247	6	1
O35465	Peptidyl-prolyl cis-trans isomerase FKBP8 OS=Mus musculus GN=Fkbp8 PE=1 SV=2	52.1285	26.8844	5	1
O35593	26S proteasome non-ATPase regulatory subunit 14 OS=Mus musculus GN=Psmd14 PE=1 SV=2	90.0787	10.0192	6	1
O35638	Cohesin subunit SA-2 OS=Mus musculus GN=Stag2 PE=1 SV=3	42.0897	7.09366	5	1
O35658	Complement component 1 Q subcomponent-binding protein, mitochondrial OS=Mus musculus GN=C1qbp PE=1 SV=1	87.6341	4.46964	13	1
O35682	Myeloid-associated differentiation marker OS=Mus musculus GN=Myadm PE=2 SV=2	74.6074	13.3087	2	1
O35691	Pinin OS=Mus musculus GN=Pnn PE=1 SV=4	68.6592	5.18699	5	1
O35841	Apoptosis inhibitor 5 OS=Mus musculus GN=Api5 PE=1 SV=2	56.8537	2.16747	8	1
O35857	Mitochondrial import inner membrane translocase subunit TIM44 OS=Mus musculus GN=Timm44 PE=1 SV=2	74.7492	9.45518	20	1
O35887	Calumenin OS=Mus musculus GN=Calu PE=1 SV=1	71.7323	9.95901	20	1
O35900	U6 snRNA-associated Sm-like protein LSm2 OS=Mus musculus GN=Lsm2 PE=3 SV=1	82.9067	5.17585	2	1
O35969	Guanidinoacetate N-methyltransferase OS=Mus musculus GN=Gamt PE=1 SV=1	95.5691	3.37242	5	1
O35972	39S ribosomal protein L23, mitochondrial OS=Mus musculus GN=Mrpl23 PE=2 SV=1	79.9415	10.7691	3	1
O54692	Centromere/kinetochore protein zw10 homolog OS=Mus musculus GN=Zw10 PE=2 SV=3	80.7642	9.44773	5	1
O54724	Polymerase I and transcript release factor OS=Mus musculus GN=Ptrf PE=1 SV=1	64.617	13.3711	13	1
O54734	Dolichyl-diphosphooligosaccharide--protein glycosyltransferase 48 kDa subunit OS=Mus musculus GN=Ddost PE=1 SV=2	82.3474	9.29829	17	1
O54825	Bystin OS=Mus musculus GN=Bysl PE=1 SV=3	90.6396	5.39651	2	1
O54890	Integrin beta-3 OS=Mus musculus GN=Itgb3 PE=1 SV=2	89.6535	6.1633	3	1
O54941	SWI/SNF-related matrix-associated actin-dependent regulator of chromatin subfamily E member 1 OS=Mus musculus GN=Smarce1 PE=1 SV=1	53.7428	11.1763	5	1
O54946	DnaJ homolog subfamily B member 6 OS=Mus musculus GN=Dnajb6 PE=1 SV=4	44.8531	3.36453	2	1
O54962	Barrier-to-autointegration factor OS=Mus musculus GN=Banf1 PE=1 SV=1	77.7272	1.87705	4	1
O54984	ATPase Asna1 OS=Mus musculus GN=Asna1 PE=1 SV=2	81.0907	14.948	8	1
O54998	Peptidyl-prolyl cis-trans isomerase FKBP7 OS=Mus musculus GN=Fkbp7 PE=1 SV=1	56.8491	0.313987	2	1
O55029	Coatomer subunit beta' OS=Mus musculus GN=Copb2 PE=2 SV=2	66.0049	26.2939	8	1
O55126	Protein NipSnap homolog 2 OS=Mus musculus GN=Gbas PE=2 SV=1	82.59	5.25513	9	1
O55137	Acyl-coenzyme A thioesterase 1 OS=Mus musculus GN=Acot1 PE=1 SV=1	81.8003	0.70856	3	1
O55143	Sarcoplasmic/endoplasmic reticulum calcium ATPase 2 OS=Mus musculus GN=Atp2a2 PE=1 SV=2	57.0794	17.6486	39	1
O55201	Transcription elongation factor SPT5 OS=Mus musculus GN=Supt5h PE=1 SV=1	70.1027	33.2628	3	1
O55222	Integrin-linked protein kinase OS=Mus musculus GN=Ilk PE=1 SV=2	94.2993	2.4386	6	1
O55240	11-cis retinol dehydrogenase OS=Mus musculus GN=Rdh5 PE=1 SV=1	55.4923	6.24846	4	1
O55242	Sigma non-opioid intracellular receptor 1 OS=Mus musculus GN=Sigmar1 PE=1 SV=1	93.6619	NA	1	1
O70133	ATP-dependent RNA helicase A OS=Mus musculus GN=Dhx9 PE=1 SV=2	72.5221	10.5094	29	1
O70152	Dolichol-phosphate mannosyltransferase subunit 1 OS=Mus musculus GN=Dpm1 PE=2 SV=1	61.1245	4.68892	5	1
O70194	Eukaryotic translation initiation factor 3 subunit D OS=Mus musculus GN=Eif3d PE=1 SV=2	67.7883	16.2224	9	1
O70209	PDZ and LIM domain protein 3 OS=Mus musculus GN=Pdlim3 PE=1 SV=1	58.442	2.54407	2	1
O70251	Elongation factor 1-beta OS=Mus musculus GN=Eef1b PE=1 SV=5	76.7336	NA	1	1
O70305	Ataxin-2 OS=Mus musculus GN=Atxn2 PE=1 SV=1	54.5831	26.5394	4	1
O70310	Glycylpeptide N-tetradecanoyltransferase 1 OS=Mus musculus GN=Nmt1 PE=1 SV=1	62.4418	19.4954	9	1
O70373	Xin actin-binding repeat-containing protein 1 OS=Mus musculus GN=Xirp1 PE=1 SV=2	53.342	10.7668	25	1
O70404	Vesicle-associated membrane protein 8 OS=Mus musculus GN=Vamp8 PE=1 SV=1	37.3809	3.90786	2	1
O70456	14-3-3 protein sigma OS=Mus musculus GN=Sfn PE=1 SV=2	80.8745	2.42221	3	1
O70492	Sorting nexin-3 OS=Mus musculus GN=Snx3 PE=1 SV=3	96.9067	1.35225	3	1
O70503	Estradiol 17-beta-dehydrogenase 12 OS=Mus musculus GN=Hsd17b12 PE=2 SV=1	74.9111	12.1755	10	1
O70572	Sphingomyelin phosphodiesterase 2 OS=Mus musculus GN=Smpd2 PE=1 SV=1	73.7388	8.08727	4	1
O88207	Collagen alpha-1(V) chain OS=Mus musculus GN=Col5a1 PE=2 SV=2	29.0469	19.1671	14	1
O88291	DBIRD complex subunit ZNF326 OS=Mus musculus GN=Znf326 PE=2 SV=1	67.4569	6.34351	7	1
O88532	Zinc finger RNA-binding protein OS=Mus musculus GN=Zfr PE=1 SV=2	30.75	5.27481	9	1
O88569	Heterogeneous nuclear ribonucleoproteins A2/B1 OS=Mus musculus GN=Hnrnpa2b1 PE=1 SV=2	74.3508	13.9613	35	1
O88587	Catechol O-methyltransferase OS=Mus musculus GN=Comt PE=1 SV=2	76.7185	12.611	10	1
O88630	Golgi SNAP receptor complex member 1 OS=Mus musculus GN=Gosr1 PE=1 SV=2	54.1318	7.67523	5	1
O88693	Ceramide glucosyltransferase OS=Mus musculus GN=Ugcg PE=1 SV=1	36.3065	24.5548	3	1
O88696	ATP-dependent Clp protease proteolytic subunit, mitochondrial OS=Mus musculus GN=Clpp PE=1 SV=1	84.8866	8.52729	6	1
O88712	C-terminal-binding protein 1 OS=Mus musculus GN=Ctbp1 PE=1 SV=2	54.7127	52.1717	2	1
O88736	3-keto-steroid reductase OS=Mus musculus GN=Hsd17b7 PE=2 SV=1	63.7648	21.3558	2	1
O88829	Lactosylceramide alpha-2,3-sialyltransferase OS=Mus musculus GN=St3gal5 PE=2 SV=2	30.6421	27.2468	5	1
O88856	Protein-tyrosine sulfotransferase 2 OS=Mus musculus GN=Tpst2 PE=1 SV=1	49.8406	20.7947	5	1
O88874	Cyclin-K OS=Mus musculus GN=Ccnk PE=1 SV=3	57.5751	2.12525	2	1
O88967	ATP-dependent zinc metalloprotease YME1L1 OS=Mus musculus GN=Yme1l1 PE=2 SV=1	62.103	10.7537	10	1
O88983	Syntaxin-8 OS=Mus musculus GN=Stx8 PE=1 SV=1	58.666	5.98892	3	1
O88986	2-amino-3-ketobutyrate coenzyme A ligase, mitochondrial OS=Mus musculus GN=Gcat PE=1 SV=2	95.2879	1.82383	6	1
O88990	Alpha-actinin-3 OS=Mus musculus GN=Actn3 PE=2 SV=1	49.7612	9.60718	37	1
O89001	Carboxypeptidase D OS=Mus musculus GN=Cpd PE=1 SV=2	57.7647	17.6096	8	1
O89017	Legumain OS=Mus musculus GN=Lgmn PE=1 SV=1	40.6592	14.2714	2	1
O89079	Coatomer subunit epsilon OS=Mus musculus GN=Cope PE=2 SV=3	66.6181	5.66139	3	1
P00375	Dihydrofolate reductase OS=Mus musculus GN=Dhfr PE=1 SV=3	96.404	4.70757	2	1
P00493	Hypoxanthine-guanine phosphoribosyltransferase OS=Mus musculus GN=Hprt1 PE=1 SV=3	88.563	NA	1	1
P02463	Collagen alpha-1(IV) chain OS=Mus musculus GN=Col4a1 PE=2 SV=4	66.0393	NA	1	1
P02468	Laminin subunit gamma-1 OS=Mus musculus GN=Lamc1 PE=1 SV=2	83.1666	18.2864	22	1
P03995	Glial fibrillary acidic protein OS=Mus musculus GN=Gfap PE=1 SV=4	66.0169	8.23482	4	1
P04627	Serine/threonine-protein kinase A-Raf OS=Mus musculus GN=Araf PE=2 SV=2	94.8252	3.89998	2	1
P04760	Acetylcholine receptor subunit gamma OS=Mus musculus GN=Chrng PE=2 SV=1	22.5061	6.58712	2	1
P05202	Aspartate aminotransferase, mitochondrial OS=Mus musculus GN=Got2 PE=1 SV=1	87.7898	3.32795	29	1
P05213	Tubulin alpha-1B chain OS=Mus musculus GN=Tuba1b PE=1 SV=2	93.5617	5.47128	25	1
P05214	Tubulin alpha-3 chain OS=Mus musculus GN=Tuba3a PE=1 SV=1	93.1352	5.96482	18	1
P05977	Myosin light chain 1/3, skeletal muscle isoform OS=Mus musculus GN=Myl1 PE=1 SV=2	63.2488	6.55677	22	1
P06745	Glucose-6-phosphate isomerase OS=Mus musculus GN=Gpi PE=1 SV=4	93.1987	4.90498	3	1
P06802	Ectonucleotide pyrophosphatase/phosphodiesterase family member 1 OS=Mus musculus GN=Enpp1 PE=1 SV=4	72.8257	11.4947	9	1
P06869	Urokinase-type plasminogen activator OS=Mus musculus GN=Plau PE=1 SV=1	41.5999	15.4917	4	1
P07091	Protein S100-A4 OS=Mus musculus GN=S100a4 PE=1 SV=1	88.1392	8.22996	7	1
P07356	Annexin A2 OS=Mus musculus GN=Anxa2 PE=1 SV=2	83.2139	3.46407	40	1
P08003	Protein disulfide-isomerase A4 OS=Mus musculus GN=Pdia4 PE=1 SV=3	72.952	6.7029	35	1
P08030	Adenine phosphoribosyltransferase OS=Mus musculus GN=Aprt PE=1 SV=2	95.2406	2.58645	2	1
P08074	Carbonyl reductase [NADPH] 2 OS=Mus musculus GN=Cbr2 PE=1 SV=1	91.5069	6.66392	7	1
P08122	Collagen alpha-2(IV) chain OS=Mus musculus GN=Col4a2 PE=2 SV=4	82.7551	6.3569	2	1
P08207	Protein S100-A10 OS=Mus musculus GN=S100a10 PE=1 SV=2	75.9968	3.96708	7	1
P08228	Superoxide dismutase [Cu-Zn] OS=Mus musculus GN=Sod1 PE=1 SV=2	92.4315	3.13802	3	1
P08249	Malate dehydrogenase, mitochondrial OS=Mus musculus GN=Mdh2 PE=1 SV=3	82.2901	18.625	35	1
P08551	Neurofilament light polypeptide OS=Mus musculus GN=Nefl PE=1 SV=5	62.2695	35.2914	5	1
P08553	Neurofilament medium polypeptide OS=Mus musculus GN=Nefm PE=1 SV=4	71.5296	13.5013	4	1
P08752	Guanine nucleotide-binding protein G(i) subunit alpha-2 OS=Mus musculus GN=Gnai2 PE=1 SV=5	69.7784	17.3262	9	1
P08775	DNA-directed RNA polymerase II subunit RPB1 OS=Mus musculus GN=Polr2a PE=1 SV=3	17.9421	13.1525	12	1
P09041	Phosphoglycerate kinase 2 OS=Mus musculus GN=Pgk2 PE=1 SV=4	92.0783	5.62889	4	1
P09055	Integrin beta-1 OS=Mus musculus GN=Itgb1 PE=1 SV=1	55.0375	16.4577	17	1
P09411	Phosphoglycerate kinase 1 OS=Mus musculus GN=Pgk1 PE=1 SV=4	94.2913	4.67226	19	1
P09541	Myosin light chain 4 OS=Mus musculus GN=Myl4 PE=2 SV=3	52.4083	6.89387	15	1
P09671	Superoxide dismutase [Mn], mitochondrial OS=Mus musculus GN=Sod2 PE=1 SV=3	84.4905	1.60559	15	1
P0DM40	Fer-1-like protein 5 OS=Mus musculus GN=Fer1l5 PE=1 SV=1	84.4653	1.57622	2	1
P10493	Nidogen-1 OS=Mus musculus GN=Nid1 PE=1 SV=2	71.4481	11.393	18	1
P10605	Cathepsin B OS=Mus musculus GN=Ctsb PE=1 SV=2	66.0055	19.7018	15	1
P10630	Eukaryotic initiation factor 4A-II OS=Mus musculus GN=Eif4a2 PE=2 SV=2	84.7628	18.1795	13	1
P10649	Glutathione S-transferase Mu 1 OS=Mus musculus GN=Gstm1 PE=1 SV=2	83.0936	34.6147	7	1
P10833	Ras-related protein R-Ras OS=Mus musculus GN=Rras PE=2 SV=1	64.1013	16.663	4	1
P10852	4F2 cell-surface antigen heavy chain OS=Mus musculus GN=Slc3a2 PE=1 SV=1	73.1685	15.0923	18	1
P11087	Collagen alpha-1(I) chain OS=Mus musculus GN=Col1a1 PE=1 SV=4	13.1787	10.1065	23	1
P11103	Poly [ADP-ribose] polymerase 1 OS=Mus musculus GN=Parp1 PE=1 SV=3	48.9015	4.41228	4	1
P11214	Tissue-type plasminogen activator OS=Mus musculus GN=Plat PE=1 SV=3	42.3348	27.8465	6	1
P11276	Fibronectin OS=Mus musculus GN=Fn1 PE=1 SV=4	67.2801	17.0676	113	1
P11499	Heat shock protein HSP 90-beta OS=Mus musculus GN=Hsp90ab1 PE=1 SV=3	75.923	24.1326	24	1
P11688	Integrin alpha-5 OS=Mus musculus GN=Itga5 PE=1 SV=3	62.6374	9.21737	17	1
P11881	Inositol 1,4,5-trisphosphate receptor type 1 OS=Mus musculus GN=Itpr1 PE=1 SV=2	52.5611	45.0299	3	1
P11983	T-complex protein 1 subunit alpha OS=Mus musculus GN=Tcp1 PE=1 SV=3	75.7693	12.5637	15	1
P12382	ATP-dependent 6-phosphofructokinase, liver type OS=Mus musculus GN=Pfkl PE=1 SV=4	96.3479	2.67369	7	1
P12787	Cytochrome c oxidase subunit 5A, mitochondrial OS=Mus musculus GN=Cox5a PE=1 SV=2	82.397	8.20067	21	1
P12815	Programmed cell death protein 6 OS=Mus musculus GN=Pdcd6 PE=1 SV=2	69.9895	25.3806	9	1
P13020	Gelsolin OS=Mus musculus GN=Gsn PE=1 SV=3	79.8491	8.76596	31	1
P13541	Myosin-3 OS=Mus musculus GN=Myh3 PE=2 SV=2	78.3559	10.1846	152	1
P13542	Myosin-8 OS=Mus musculus GN=Myh8 PE=2 SV=2	69.4345	11.8104	102	1
P13595	Neural cell adhesion molecule 1 OS=Mus musculus GN=Ncam1 PE=1 SV=3	46.6079	4.24879	19	1
P14115	60S ribosomal protein L27a OS=Mus musculus GN=Rpl27a PE=2 SV=5	76.5708	6.29063	4	1
P14152	Malate dehydrogenase, cytoplasmic OS=Mus musculus GN=Mdh1 PE=1 SV=3	84.53	14.4303	2	1
P14206	40S ribosomal protein SA OS=Mus musculus GN=Rpsa PE=1 SV=4	82.493	10.8707	21	1
P14426	H-2 class I histocompatibility antigen, D-K alpha chain OS=Mus musculus GN=H2-D1 PE=1 SV=1	18.4173	6.84169	3	1
P14602	Heat shock protein beta-1 OS=Mus musculus GN=Hspb1 PE=1 SV=3	88.7008	8.4178	33	1
P14685	26S proteasome non-ATPase regulatory subunit 3 OS=Mus musculus GN=Psmd3 PE=1 SV=3	92.3296	8.44279	16	1
P14733	Lamin-B1 OS=Mus musculus GN=Lmnb1 PE=1 SV=3	88.1604	5.83302	26	1
P14824	Annexin A6 OS=Mus musculus GN=Anxa6 PE=1 SV=3	81.6669	5.15578	59	1
P14869	60S acidic ribosomal protein P0 OS=Mus musculus GN=Rplp0 PE=1 SV=3	80.5651	8.7048	18	1
P14873	Microtubule-associated protein 1B OS=Mus musculus GN=Map1b PE=1 SV=2	54.4531	14.4314	20	1
P15532	Nucleoside diphosphate kinase A OS=Mus musculus GN=Nme1 PE=1 SV=1	89.3327	3.72167	10	1
P15864	Histone H1.2 OS=Mus musculus GN=Hist1h1c PE=1 SV=2	83.8969	3.34202	10	1
P16045	Galectin-1 OS=Mus musculus GN=Lgals1 PE=1 SV=3	82.3133	6.84229	7	1
P16332	Methylmalonyl-CoA mutase, mitochondrial OS=Mus musculus GN=Mut PE=1 SV=2	67.0668	21.7232	18	1
P16381	Putative ATP-dependent RNA helicase Pl10 OS=Mus musculus GN=D1Pas1 PE=2 SV=1	48.5841	11.5664	15	1
P16546	Spectrin alpha chain, non-erythrocytic 1 OS=Mus musculus GN=Sptan1 PE=1 SV=4	66.6646	11.505	136	1
P17156	Heat shock-related 70 kDa protein 2 OS=Mus musculus GN=Hspa2 PE=1 SV=2	69.1442	10.5424	16	1
P17182	Alpha-enolase OS=Mus musculus GN=Eno1 PE=1 SV=3	92.0638	5.43204	22	1
P17225	Polypyrimidine tract-binding protein 1 OS=Mus musculus GN=Ptbp1 PE=1 SV=2	76.8872	12.8878	17	1
P17426	AP-2 complex subunit alpha-1 OS=Mus musculus GN=Ap2a1 PE=1 SV=1	61.3123	21.079	17	1
P17439	Glucosylceramidase OS=Mus musculus GN=Gba PE=1 SV=1	84.0767	4.86868	10	1
P17751	Triosephosphate isomerase OS=Mus musculus GN=Tpi1 PE=1 SV=4	92.7577	4.70216	10	1
P18155	Bifunctional methylenetetrahydrofolate dehydrogenase/cyclohydrolase, mitochondrial OS=Mus musculus GN=Mthfd2 PE=1 SV=1	55.7859	19.6633	9	1
P18572	Basigin OS=Mus musculus GN=Bsg PE=1 SV=2	81.4322	5.66602	6	1
P19096	Fatty acid synthase OS=Mus musculus GN=Fasn PE=1 SV=2	95.4641	3.22723	25	1
P19123	Troponin C, slow skeletal and cardiac muscles OS=Mus musculus GN=Tnnc1 PE=2 SV=1	32.006	NA	1	1
P19157	Glutathione S-transferase P 1 OS=Mus musculus GN=Gstp1 PE=1 SV=2	93.1298	8.71391	8	1
P19253	60S ribosomal protein L13a OS=Mus musculus GN=Rpl13a PE=1 SV=4	75.9366	3.05038	5	1
P19536	Cytochrome c oxidase subunit 5B, mitochondrial OS=Mus musculus GN=Cox5b PE=1 SV=1	82.8793	7.08407	10	1
P19639	Glutathione S-transferase Mu 3 OS=Mus musculus GN=Gstm3 PE=1 SV=2	95.8766	1.18658	5	1
P19783	Cytochrome c oxidase subunit 4 isoform 1, mitochondrial OS=Mus musculus GN=Cox4i1 PE=1 SV=2	82.5032	6.3258	12	1
P20029	78 kDa glucose-regulated protein OS=Mus musculus GN=Hspa5 PE=1 SV=3	70.9651	15.5206	60	1
P20060	Beta-hexosaminidase subunit beta OS=Mus musculus GN=Hexb PE=2 SV=2	78.2777	6.33308	7	1
P20108	Thioredoxin-dependent peroxide reductase, mitochondrial OS=Mus musculus GN=Prdx3 PE=1 SV=1	77.4126	22.792	12	1
P20152	Vimentin OS=Mus musculus GN=Vim PE=1 SV=3	75.8395	9.83288	88	1
P20444	Protein kinase C alpha type OS=Mus musculus GN=Prkca PE=1 SV=3	79.282	NA	1	1
P21107	Tropomyosin alpha-3 chain OS=Mus musculus GN=Tpm3 PE=1 SV=3	47.7524	11.8667	21	1
P21279	Guanine nucleotide-binding protein G(q) subunit alpha OS=Mus musculus GN=Gnaq PE=1 SV=4	74.8021	16.9313	12	1
P21550	Beta-enolase OS=Mus musculus GN=Eno3 PE=1 SV=3	89.6675	3.99712	14	1
P21619	Lamin-B2 OS=Mus musculus GN=Lmnb2 PE=1 SV=2	83.3918	6.62837	23	1
P21956	Lactadherin OS=Mus musculus GN=Mfge8 PE=1 SV=3	78.2848	6.7262	18	1
P21981	Protein-glutamine gamma-glutamyltransferase 2 OS=Mus musculus GN=Tgm2 PE=1 SV=4	77.4602	6.23649	10	1
P23475	X-ray repair cross-complementing protein 6 OS=Mus musculus GN=Xrcc6 PE=1 SV=5	45.0683	19.7985	5	1
P23927	Alpha-crystallin B chain OS=Mus musculus GN=Cryab PE=1 SV=2	85.6927	12.937	7	1
P24270	Catalase OS=Mus musculus GN=Cat PE=1 SV=4	45.4505	15.0534	23	1
P24369	Peptidyl-prolyl cis-trans isomerase B OS=Mus musculus GN=Ppib PE=1 SV=2	75.751	5.75124	18	1
P24452	Macrophage-capping protein OS=Mus musculus GN=Capg PE=1 SV=2	79.8696	2.94375	5	1
P26039	Talin-1 OS=Mus musculus GN=Tln1 PE=1 SV=2	67.136	7.99465	66	1
P26041	Moesin OS=Mus musculus GN=Msn PE=1 SV=3	85.769	7.07239	28	1
P26443	Glutamate dehydrogenase 1, mitochondrial OS=Mus musculus GN=Glud1 PE=1 SV=1	84.087	4.49148	45	1
P26883	Peptidyl-prolyl cis-trans isomerase FKBP1A OS=Mus musculus GN=Fkbp1a PE=1 SV=2	75.135	0.999062	2	1
P27046	Alpha-mannosidase 2 OS=Mus musculus GN=Man2a1 PE=1 SV=2	67.7098	19.3579	22	1
P27546	Microtubule-associated protein 4 OS=Mus musculus GN=Map4 PE=1 SV=3	58.9239	12.6943	23	1
P27601	Guanine nucleotide-binding protein subunit alpha-13 OS=Mus musculus GN=Gna13 PE=1 SV=1	57.1851	29.6422	6	1
P27641	X-ray repair cross-complementing protein 5 OS=Mus musculus GN=Xrcc5 PE=2 SV=4	51.336	23.216	6	1
P27661	Histone H2AX OS=Mus musculus GN=H2afx PE=1 SV=2	91.4092	3.97132	18	1
P27773	Protein disulfide-isomerase A3 OS=Mus musculus GN=Pdia3 PE=1 SV=2	78.1861	7.65705	45	1
P28028	Serine/threonine-protein kinase B-raf OS=Mus musculus GN=Braf PE=1 SV=3	94.8252	3.89998	2	1
P28271	Cytoplasmic aconitate hydratase OS=Mus musculus GN=Aco1 PE=1 SV=3	81.5195	9.07404	6	1
P28352	DNA-(apurinic or apyrimidinic site) lyase OS=Mus musculus GN=Apex1 PE=1 SV=2	66.1876	2.64605	5	1
P28653	Biglycan OS=Mus musculus GN=Bgn PE=2 SV=1	54.7157	21.8051	4	1
P28659	CUGBP Elav-like family member 1 OS=Mus musculus GN=Celf1 PE=1 SV=2	76.3196	9.89684	9	1
P28663	Beta-soluble NSF attachment protein OS=Mus musculus GN=Napb PE=1 SV=2	48.6031	4.4714	3	1
P30412	Peptidyl-prolyl cis-trans isomerase C OS=Mus musculus GN=Ppic PE=1 SV=1	63.2745	5.20435	7	1
P30677	Guanine nucleotide-binding protein subunit alpha-14 OS=Mus musculus GN=Gna14 PE=1 SV=2	64.8577	13.8698	7	1
P31230	Aminoacyl tRNA synthase complex-interacting multifunctional protein 1 OS=Mus musculus GN=Aimp1 PE=1 SV=2	51.7633	27.8709	9	1
P31254	Ubiquitin-like modifier-activating enzyme 1 Y OS=Mus musculus GN=Uba1y PE=2 SV=2	96.4674	1.58957	4	1
P31324	cAMP-dependent protein kinase type II-beta regulatory subunit OS=Mus musculus GN=Prkar2b PE=1 SV=3	94.9216	3.0932	4	1
P32020	Non-specific lipid-transfer protein OS=Mus musculus GN=Scp2 PE=1 SV=3	54.2218	12.4411	15	1
P33146	Cadherin-15 OS=Mus musculus GN=Cdh15 PE=1 SV=3	30.6353	16.7839	13	1
P33267	Cytochrome P450 2F2 OS=Mus musculus GN=Cyp2f2 PE=2 SV=1	34.6056	9.53042	3	1
P34884	Macrophage migration inhibitory factor OS=Mus musculus GN=Mif PE=1 SV=2	94.7829	1.63489	2	1
P35279	Ras-related protein Rab-6A OS=Mus musculus GN=Rab6a PE=1 SV=4	66.0914	1.42463	4	1
P35283	Ras-related protein Rab-12 OS=Mus musculus GN=Rab12 PE=1 SV=3	93.5514	3.10492	2	1
P35293	Ras-related protein Rab-18 OS=Mus musculus GN=Rab18 PE=2 SV=2	62.4176	14.347	5	1
P35486	Pyruvate dehydrogenase E1 component subunit alpha, somatic form, mitochondrial OS=Mus musculus GN=Pdha1 PE=1 SV=1	78.5977	7.12265	29	1
P35550	rRNA 2'-O-methyltransferase fibrillarin OS=Mus musculus GN=Fbl PE=2 SV=2	81.8195	3.68589	10	1
P35564	Calnexin OS=Mus musculus GN=Canx PE=1 SV=1	74.4446	10.5658	56	1
P35762	CD81 antigen OS=Mus musculus GN=Cd81 PE=1 SV=2	52.4969	0.130565	2	1
P36536	GTP-binding protein SAR1a OS=Mus musculus GN=Sar1a PE=2 SV=1	83.6264	17.9414	3	1
P36552	Oxygen-dependent coproporphyrinogen-III oxidase, mitochondrial OS=Mus musculus GN=Cpox PE=1 SV=2	74.9749	7.37051	8	1
P37040	NADPH--cytochrome P450 reductase OS=Mus musculus GN=Por PE=1 SV=2	71.6711	8.95679	22	1
P38060	Hydroxymethylglutaryl-CoA lyase, mitochondrial OS=Mus musculus GN=Hmgcl PE=1 SV=2	80.2156	7.36115	5	1
P38647	Stress-70 protein, mitochondrial OS=Mus musculus GN=Hspa9 PE=1 SV=3	78.6364	14.7469	63	1
P39447	Tight junction protein ZO-1 OS=Mus musculus GN=Tjp1 PE=1 SV=2	50.1192	15.8829	15	1
P39688	Tyrosine-protein kinase Fyn OS=Mus musculus GN=Fyn PE=1 SV=4	74.572	12.12	2	1
P40237	CD82 antigen OS=Mus musculus GN=Cd82 PE=1 SV=1	70.5215	5.2087	4	1
P40630	Transcription factor A, mitochondrial OS=Mus musculus GN=Tfam PE=1 SV=2	88.2102	6.34165	9	1
P41216	Long-chain-fatty-acid--CoA ligase 1 OS=Mus musculus GN=Acsl1 PE=1 SV=2	73.6086	7.38098	15	1
P42125	Enoyl-CoA delta isomerase 1, mitochondrial OS=Mus musculus GN=Eci1 PE=1 SV=2	86.4703	4.5548	10	1
P42208	Septin-2 OS=Mus musculus GN=Sept2 PE=1 SV=2	92.1564	10.1342	5	1
P42669	Transcriptional activator protein Pur-alpha OS=Mus musculus GN=Pura PE=1 SV=1	73.6199	1.68334	4	1
P43024	Cytochrome c oxidase subunit 6A1, mitochondrial OS=Mus musculus GN=Cox6a1 PE=1 SV=2	68.3101	2.30489	6	1
P43274	Histone H1.4 OS=Mus musculus GN=Hist1h1e PE=1 SV=2	85.519	3.99767	12	1
P43275	Histone H1.1 OS=Mus musculus GN=Hist1h1a PE=1 SV=2	87.892	4.27008	6	1
P43276	Histone H1.5 OS=Mus musculus GN=Hist1h1b PE=1 SV=2	91.5359	1.51311	7	1
P43406	Integrin alpha-V OS=Mus musculus GN=Itgav PE=1 SV=2	68.7658	10.1444	17	1
P45377	Aldose reductase-related protein 2 OS=Mus musculus GN=Akr1b8 PE=1 SV=2	72.331	46.98	4	1
P45878	Peptidyl-prolyl cis-trans isomerase FKBP2 OS=Mus musculus GN=Fkbp2 PE=1 SV=1	74.6994	2.05969	5	1
P45952	Medium-chain specific acyl-CoA dehydrogenase, mitochondrial OS=Mus musculus GN=Acadm PE=1 SV=1	79.8717	8.62085	26	1
P46425	Glutathione S-transferase P 2 OS=Mus musculus GN=Gstp2 PE=2 SV=2	96.8739	1.54066	2	1
P46460	Vesicle-fusing ATPase OS=Mus musculus GN=Nsf PE=1 SV=2	80.4204	10.309	14	1
P46471	26S protease regulatory subunit 7 OS=Mus musculus GN=Psmc2 PE=1 SV=5	84.027	26.2903	17	1
P46660	Alpha-internexin OS=Mus musculus GN=Ina PE=1 SV=3	77.8225	5.98554	3	1
P46935	E3 ubiquitin-protein ligase NEDD4 OS=Mus musculus GN=Nedd4 PE=1 SV=3	72.8008	30.5026	8	1
P47757	F-actin-capping protein subunit beta OS=Mus musculus GN=Capzb PE=1 SV=3	53.015	26.9466	8	1
P47857	ATP-dependent 6-phosphofructokinase, muscle type OS=Mus musculus GN=Pfkm PE=1 SV=3	93.6775	2.24766	4	1
P47880	Insulin-like growth factor-binding protein 6 OS=Mus musculus GN=Igfbp6 PE=2 SV=2	56.5877	NA	1	1
P47911	60S ribosomal protein L6 OS=Mus musculus GN=Rpl6 PE=1 SV=3	75.8622	8.31711	15	1
P47934	Carnitine O-acetyltransferase OS=Mus musculus GN=Crat PE=1 SV=3	76.315	1.94975	16	1
P47963	60S ribosomal protein L13 OS=Mus musculus GN=Rpl13 PE=2 SV=3	75.0883	7.81098	6	1
P48036	Annexin A5 OS=Mus musculus GN=Anxa5 PE=1 SV=1	84.5638	4.62922	20	1
P48410	ATP-binding cassette sub-family D member 1 OS=Mus musculus GN=Abcd1 PE=1 SV=1	75.2659	6.77501	3	1
P48678	Prelamin-A/C OS=Mus musculus GN=Lmna PE=1 SV=2	75.0763	5.33273	63	1
P48722	Heat shock 70 kDa protein 4L OS=Mus musculus GN=Hspa4l PE=1 SV=2	97.2081	0.977954	6	1
P48771	Cytochrome c oxidase subunit 7A2, mitochondrial OS=Mus musculus GN=Cox7a2 PE=1 SV=2	70.3865	3.40891	4	1
P48962	ADP/ATP translocase 1 OS=Mus musculus GN=Slc25a4 PE=1 SV=4	80.198	20.8268	18	1
P48999	Arachidonate 5-lipoxygenase OS=Mus musculus GN=Alox5 PE=1 SV=3	71.2063	9.85436	21	1
P49586	Choline-phosphate cytidylyltransferase A OS=Mus musculus GN=Pcyt1a PE=1 SV=1	72.0186	8.1305	2	1
P49813	Tropomodulin-1 OS=Mus musculus GN=Tmod1 PE=2 SV=2	53.9268	4.85534	9	1
P49817	Caveolin-1 OS=Mus musculus GN=Cav1 PE=1 SV=1	68.4585	33.9166	6	1
P50171	Estradiol 17-beta-dehydrogenase 8 OS=Mus musculus GN=Hsd17b8 PE=1 SV=2	78.2396	5.64364	6	1
P50285	Dimethylaniline monooxygenase [N-oxide-forming] 1 OS=Mus musculus GN=Fmo1 PE=1 SV=1	70.1875	25.4624	9	1
P50396	Rab GDP dissociation inhibitor alpha OS=Mus musculus GN=Gdi1 PE=1 SV=3	92.596	3.26748	4	1
P50516	V-type proton ATPase catalytic subunit A OS=Mus musculus GN=Atp6v1a PE=1 SV=2	85.5957	12.8009	19	1
P50518	V-type proton ATPase subunit E 1 OS=Mus musculus GN=Atp6v1e1 PE=1 SV=2	66.8578	13.8202	11	1
P50544	Very long-chain specific acyl-CoA dehydrogenase, mitochondrial OS=Mus musculus GN=Acadvl PE=1 SV=3	80.974	10.1919	41	1
P51150	Ras-related protein Rab-7a OS=Mus musculus GN=Rab7a PE=1 SV=2	58.456	12.402	20	1
P51174	Long-chain specific acyl-CoA dehydrogenase, mitochondrial OS=Mus musculus GN=Acadl PE=1 SV=2	85.248	7.2953	28	1
P51175	Protoporphyrinogen oxidase OS=Mus musculus GN=Ppox PE=1 SV=1	72.3162	29.9327	8	1
P51410	60S ribosomal protein L9 OS=Mus musculus GN=Rpl9 PE=1 SV=2	83.1477	11.7748	8	1
P51660	Peroxisomal multifunctional enzyme type 2 OS=Mus musculus GN=Hsd17b4 PE=1 SV=3	64.0792	18.0394	31	1
P51859	Hepatoma-derived growth factor OS=Mus musculus GN=Hdgf PE=1 SV=2	73.5	1.28694	3	1
P51863	V-type proton ATPase subunit d 1 OS=Mus musculus GN=Atp6v0d1 PE=1 SV=2	84.5586	7.27927	6	1
P51881	ADP/ATP translocase 2 OS=Mus musculus GN=Slc25a5 PE=1 SV=3	82.2811	20.8354	19	1
P52019	Squalene monooxygenase OS=Mus musculus GN=Sqle PE=2 SV=1	19.0539	4.68427	4	1
P52196	Thiosulfate sulfurtransferase OS=Mus musculus GN=Tst PE=1 SV=3	59.6073	3.85619	2	1
P52432	DNA-directed RNA polymerases I and III subunit RPAC1 OS=Mus musculus GN=Polr1c PE=1 SV=3	91.1129	NA	1	1
P52480	Pyruvate kinase PKM OS=Mus musculus GN=Pkm PE=1 SV=4	91.3671	6.23048	24	1
P52503	NADH dehydrogenase [ubiquinone] iron-sulfur protein 6, mitochondrial OS=Mus musculus GN=Ndufs6 PE=1 SV=2	67.3467	7.11898	8	1
P52825	Carnitine O-palmitoyltransferase 2, mitochondrial OS=Mus musculus GN=Cpt2 PE=1 SV=2	80.3946	5.048	17	1
P52875	Transmembrane protein 165 OS=Mus musculus GN=Tmem165 PE=2 SV=2	76.4608	15.7588	6	1
P52927	High mobility group protein HMGI-C OS=Mus musculus GN=Hmga2 PE=1 SV=1	77.2299	6.75664	2	1
P53395	Lipoamide acyltransferase component of branched-chain alpha-keto acid dehydrogenase complex, mitochondrial OS=Mus musculus GN=Dbt PE=1 SV=2	85.6069	8.58066	7	1
P53702	Cytochrome c-type heme lyase OS=Mus musculus GN=Hccs PE=1 SV=2	75.1214	10.576	6	1
P53994	Ras-related protein Rab-2A OS=Mus musculus GN=Rab2a PE=1 SV=1	72.2452	11.0678	15	1
P53995	Anaphase-promoting complex subunit 1 OS=Mus musculus GN=Anapc1 PE=2 SV=2	93.4092	6.06558	2	1
P54071	Isocitrate dehydrogenase [NADP], mitochondrial OS=Mus musculus GN=Idh2 PE=1 SV=3	88.4937	7.75704	28	1
P54116	Erythrocyte band 7 integral membrane protein OS=Mus musculus GN=Stom PE=1 SV=3	74.1163	13.0208	10	1
P54822	Adenylosuccinate lyase OS=Mus musculus GN=Adsl PE=2 SV=2	93.3246	2.65782	6	1
P54823	Probable ATP-dependent RNA helicase DDX6 OS=Mus musculus GN=Ddx6 PE=1 SV=1	41.6328	4.72598	7	1
P55065	Phospholipid transfer protein OS=Mus musculus GN=Pltp PE=1 SV=1	47.3457	16.3078	10	1
P56135	ATP synthase subunit f, mitochondrial OS=Mus musculus GN=Atp5j2 PE=1 SV=3	84.6469	6.84165	2	1
P56380	Bis(5'-nucleosyl)-tetraphosphatase [asymmetrical] OS=Mus musculus GN=Nudt2 PE=1 SV=3	79.3961	2.54432	2	1
P56391	Cytochrome c oxidase subunit 6B1 OS=Mus musculus GN=Cox6b1 PE=1 SV=2	67.6779	8.53875	3	1
P56399	Ubiquitin carboxyl-terminal hydrolase 5 OS=Mus musculus GN=Usp5 PE=1 SV=1	93.7804	3.12824	6	1
P56480	ATP synthase subunit beta, mitochondrial OS=Mus musculus GN=Atp5b PE=1 SV=2	82.0061	6.16381	54	1
P57759	Endoplasmic reticulum resident protein 29 OS=Mus musculus GN=Erp29 PE=1 SV=2	60.2021	29.9242	9	1
P57780	Alpha-actinin-4 OS=Mus musculus GN=Actn4 PE=1 SV=1	68.9093	7.43166	39	1
P57784	U2 small nuclear ribonucleoprotein A' OS=Mus musculus GN=Snrpa1 PE=1 SV=2	86.5478	4.9459	4	1
P58044	Isopentenyl-diphosphate Delta-isomerase 1 OS=Mus musculus GN=Idi1 PE=2 SV=1	79.9627	12.0207	3	1
P58281	Dynamin-like 120 kDa protein, mitochondrial OS=Mus musculus GN=Opa1 PE=1 SV=1	71.7166	4.55243	23	1
P58742	Aladin OS=Mus musculus GN=Aaas PE=1 SV=1	67.8178	38.5425	2	1
P58774	Tropomyosin beta chain OS=Mus musculus GN=Tpm2 PE=1 SV=1	48.1263	10.9957	28	1
P60229	Eukaryotic translation initiation factor 3 subunit E OS=Mus musculus GN=Eif3e PE=1 SV=1	77.0248	17.5966	8	1
P60335	Poly(rC)-binding protein 1 OS=Mus musculus GN=Pcbp1 PE=1 SV=1	79.6456	14.2688	2	1
P60766	Cell division control protein 42 homolog OS=Mus musculus GN=Cdc42 PE=1 SV=2	63.4929	NA	1	1
P60867	40S ribosomal protein S20 OS=Mus musculus GN=Rps20 PE=1 SV=1	80.9641	10.5885	7	1
P60904	DnaJ homolog subfamily C member 5 OS=Mus musculus GN=Dnajc5 PE=1 SV=1	78.2204	7.27395	2	1
P61022	Calcineurin B homologous protein 1 OS=Mus musculus GN=Chp1 PE=1 SV=2	60.3875	17.412	6	1
P61161	Actin-related protein 2 OS=Mus musculus GN=Actr2 PE=1 SV=1	80.2464	7.78958	3	1
P61164	Alpha-centractin OS=Mus musculus GN=Actr1a PE=2 SV=1	84.2048	18.4602	7	1
P61226	Ras-related protein Rap-2b OS=Mus musculus GN=Rap2b PE=1 SV=1	67.1387	1.48877	2	1
P61255	60S ribosomal protein L26 OS=Mus musculus GN=Rpl26 PE=1 SV=1	74.2495	8.60361	8	1
P61294	Ras-related protein Rab-6B OS=Mus musculus GN=Rab6b PE=1 SV=1	66.6345	1.12894	3	1
P61358	60S ribosomal protein L27 OS=Mus musculus GN=Rpl27 PE=1 SV=2	68.0066	1.92678	10	1
P61620	Protein transport protein Sec61 subunit alpha isoform 1 OS=Mus musculus GN=Sec61a1 PE=2 SV=2	79.9897	11.7613	4	1
P61750	ADP-ribosylation factor 4 OS=Mus musculus GN=Arf4 PE=1 SV=2	95.0712	1.61445	9	1
P61804	Dolichyl-diphosphooligosaccharide--protein glycosyltransferase subunit DAD1 OS=Mus musculus GN=Dad1 PE=2 SV=3	69.706	4.61998	3	1
P61979	Heterogeneous nuclear ribonucleoprotein K OS=Mus musculus GN=Hnrnpk PE=1 SV=1	66.2006	18.7482	28	1
P61982	14-3-3 protein gamma OS=Mus musculus GN=Ywhag PE=1 SV=2	81.4747	4.51969	10	1
P62071	Ras-related protein R-Ras2 OS=Mus musculus GN=Rras2 PE=1 SV=1	68.6701	15.7014	8	1
P62073	Mitochondrial import inner membrane translocase subunit Tim10 OS=Mus musculus GN=Timm10 PE=1 SV=1	65.1925	14.6378	2	1
P62075	Mitochondrial import inner membrane translocase subunit Tim13 OS=Mus musculus GN=Timm13 PE=1 SV=1	48.4379	1.58977	4	1
P62137	Serine/threonine-protein phosphatase PP1-alpha catalytic subunit OS=Mus musculus GN=Ppp1ca PE=1 SV=1	68.4111	29.3427	13	1
P62141	Serine/threonine-protein phosphatase PP1-beta catalytic subunit OS=Mus musculus GN=Ppp1cb PE=1 SV=3	78.3265	21.9596	9	1
P62192	26S protease regulatory subunit 4 OS=Mus musculus GN=Psmc1 PE=1 SV=1	88.7819	8.15582	8	1
P62196	26S protease regulatory subunit 8 OS=Mus musculus GN=Psmc5 PE=1 SV=1	90.4657	8.68482	11	1
P62242	40S ribosomal protein S8 OS=Mus musculus GN=Rps8 PE=1 SV=2	79.3244	10.8242	8	1
P62264	40S ribosomal protein S14 OS=Mus musculus GN=Rps14 PE=2 SV=3	80.8729	11.1605	9	1
P62270	40S ribosomal protein S18 OS=Mus musculus GN=Rps18 PE=1 SV=3	75.553	9.93213	12	1
P62274	40S ribosomal protein S29 OS=Mus musculus GN=Rps29 PE=2 SV=2	70.7238	2.47251	2	1
P62281	40S ribosomal protein S11 OS=Mus musculus GN=Rps11 PE=1 SV=3	68.5545	32.8984	6	1
P62305	Small nuclear ribonucleoprotein E OS=Mus musculus GN=Snrpe PE=2 SV=1	72.5335	0.560612	2	1
P62309	Small nuclear ribonucleoprotein G OS=Mus musculus GN=Snrpg PE=1 SV=1	73.6549	1.42024	2	1
P62313	U6 snRNA-associated Sm-like protein LSm6 OS=Mus musculus GN=Lsm6 PE=3 SV=1	79.31	0.0244627	2	1
P62315	Small nuclear ribonucleoprotein Sm D1 OS=Mus musculus GN=Snrpd1 PE=2 SV=1	79.9388	11.7432	4	1
P62317	Small nuclear ribonucleoprotein Sm D2 OS=Mus musculus GN=Snrpd2 PE=2 SV=1	74.5294	1.37888	4	1
P62320	Small nuclear ribonucleoprotein Sm D3 OS=Mus musculus GN=Snrpd3 PE=1 SV=1	74.5184	5.56681	2	1
P62334	26S protease regulatory subunit 10B OS=Mus musculus GN=Psmc6 PE=1 SV=1	91.9209	5.07347	12	1
P62492	Ras-related protein Rab-11A OS=Mus musculus GN=Rab11a PE=1 SV=3	56.5752	21.7561	8	1
P62631	Elongation factor 1-alpha 2 OS=Mus musculus GN=Eef1a2 PE=1 SV=1	86.8356	9.77993	6	1
P62702	40S ribosomal protein S4, X isoform OS=Mus musculus GN=Rps4x PE=2 SV=2	86.6552	10.4226	24	1
P62717	60S ribosomal protein L18a OS=Mus musculus GN=Rpl18a PE=1 SV=1	79.9349	11.3369	6	1
P62737	Actin, aortic smooth muscle OS=Mus musculus GN=Acta2 PE=1 SV=1	72.5615	11.6347	64	1
P62746	Rho-related GTP-binding protein RhoB OS=Mus musculus GN=Rhob PE=1 SV=1	29.5526	13.406	3	1
P62748	Hippocalcin-like protein 1 OS=Mus musculus GN=Hpcal1 PE=2 SV=2	73.4031	1.41667	3	1
P62806	Histone H4 OS=Mus musculus GN=Hist1h4a PE=1 SV=2	83.9308	25.3933	12	1
P62814	V-type proton ATPase subunit B, brain isoform OS=Mus musculus GN=Atp6v1b2 PE=1 SV=1	84.1218	5.06531	10	1
P62827	GTP-binding nuclear protein Ran OS=Mus musculus GN=Ran PE=1 SV=3	82.7457	12.0682	8	1
P62830	60S ribosomal protein L23 OS=Mus musculus GN=Rpl23 PE=1 SV=1	83.2444	11.9128	7	1
P62835	Ras-related protein Rap-1A OS=Mus musculus GN=Rap1a PE=2 SV=1	71.043	10.9516	9	1
P62843	40S ribosomal protein S15 OS=Mus musculus GN=Rps15 PE=2 SV=2	69.1576	3.20923	5	1
P62852	40S ribosomal protein S25 OS=Mus musculus GN=Rps25 PE=1 SV=1	74.5898	8.80874	8	1
P62855	40S ribosomal protein S26 OS=Mus musculus GN=Rps26 PE=2 SV=3	79.9349	10.825	3	1
P62892	60S ribosomal protein L39 OS=Mus musculus GN=Rpl39 PE=2 SV=2	67.3478	NA	1	1
P62908	40S ribosomal protein S3 OS=Mus musculus GN=Rps3 PE=1 SV=1	79.0712	9.72835	14	1
P62911	60S ribosomal protein L32 OS=Mus musculus GN=Rpl32 PE=1 SV=2	76.2536	4.70833	4	1
P62918	60S ribosomal protein L8 OS=Mus musculus GN=Rpl8 PE=1 SV=2	71.3194	2.04471	9	1
P62983	Ubiquitin-40S ribosomal protein S27a OS=Mus musculus GN=Rps27a PE=1 SV=2	85.1026	2.453	3	1
P62996	Transformer-2 protein homolog beta OS=Mus musculus GN=Tra2b PE=2 SV=1	65.9566	10.7577	3	1
P63024	Vesicle-associated membrane protein 3 OS=Mus musculus GN=Vamp3 PE=1 SV=1	72.2589	13.74	5	1
P63038	60 kDa heat shock protein, mitochondrial OS=Mus musculus GN=Hspd1 PE=1 SV=1	88.6083	5.93026	54	1
P63085	Mitogen-activated protein kinase 1 OS=Mus musculus GN=Mapk1 PE=1 SV=3	91.1157	3.97567	3	1
P63094	Guanine nucleotide-binding protein G(s) subunit alpha isoforms short OS=Mus musculus GN=Gnas PE=1 SV=1	58.4056	15.4277	14	1
P63101	14-3-3 protein zeta/delta OS=Mus musculus GN=Ywhaz PE=1 SV=1	79.4229	16.034	14	1
P63154	Crooked neck-like protein 1 OS=Mus musculus GN=Crnkl1 PE=1 SV=1	42.0243	35.1946	2	1
P63168	Dynein light chain 1, cytoplasmic OS=Mus musculus GN=Dynll1 PE=1 SV=1	87.5949	4.96954	3	1
P63321	Ras-related protein Ral-A OS=Mus musculus GN=Rala PE=1 SV=1	71.9106	5.42609	6	1
P63323	40S ribosomal protein S12 OS=Mus musculus GN=Rps12 PE=1 SV=2	73.3566	0.726735	2	1
P67778	Prohibitin OS=Mus musculus GN=Phb PE=1 SV=1	88.1863	4.80978	21	1
P67984	60S ribosomal protein L22 OS=Mus musculus GN=Rpl22 PE=1 SV=2	75.1724	10.477	4	1
P68040	Guanine nucleotide-binding protein subunit beta-2-like 1 OS=Mus musculus GN=Gnb2l1 PE=1 SV=3	77.0937	21.1397	11	1
P68134	Actin, alpha skeletal muscle OS=Mus musculus GN=Acta1 PE=1 SV=1	71.903	11.8294	63	1
P68181	cAMP-dependent protein kinase catalytic subunit beta OS=Mus musculus GN=Prkacb PE=1 SV=2	92.9568	0.587091	3	1
P68368	Tubulin alpha-4A chain OS=Mus musculus GN=Tuba4a PE=1 SV=1	92.3479	5.75212	21	1
P68369	Tubulin alpha-1A chain OS=Mus musculus GN=Tuba1a PE=1 SV=1	93.6867	5.39853	26	1
P68372	Tubulin beta-4B chain OS=Mus musculus GN=Tubb4b PE=1 SV=1	95.631	2.55674	32	1
P68510	14-3-3 protein eta OS=Mus musculus GN=Ywhah PE=1 SV=2	79.7764	11.1658	9	1
P70206	Plexin-A1 OS=Mus musculus GN=Plxna1 PE=1 SV=1	52.204	24.433	6	1
P70227	Inositol 1,4,5-trisphosphate receptor type 3 OS=Mus musculus GN=Itpr3 PE=1 SV=3	64.7999	13.5363	27	1
P70255	Nuclear factor 1 C-type OS=Mus musculus GN=Nfic PE=1 SV=1	31.8598	8.28196	4	1
P70271	PDZ and LIM domain protein 4 OS=Mus musculus GN=Pdlim4 PE=1 SV=3	55.9655	14.1186	5	1
P70275	Semaphorin-3E OS=Mus musculus GN=Sema3e PE=1 SV=3	71.0107	15.2399	2	1
P70288	Histone deacetylase 2 OS=Mus musculus GN=Hdac2 PE=1 SV=1	66.3924	14.6501	6	1
P70302	Stromal interaction molecule 1 OS=Mus musculus GN=Stim1 PE=1 SV=2	60.0557	4.18452	5	1
P70333	Heterogeneous nuclear ribonucleoprotein H2 OS=Mus musculus GN=Hnrnph2 PE=2 SV=1	78.7337	10.4875	6	1
P70336	Rho-associated protein kinase 2 OS=Mus musculus GN=Rock2 PE=1 SV=1	85.4428	2.19528	2	1
P70349	Histidine triad nucleotide-binding protein 1 OS=Mus musculus GN=Hint1 PE=1 SV=3	95.0896	NA	1	1
P70388	DNA repair protein RAD50 OS=Mus musculus GN=Rad50 PE=1 SV=1	75.8698	15.2538	7	1
P70398	Probable ubiquitin carboxyl-terminal hydrolase FAF-X OS=Mus musculus GN=Usp9x PE=1 SV=2	87.4188	25.6014	12	1
P70402	Myosin-binding protein H OS=Mus musculus GN=Mybph PE=1 SV=2	24.6286	NA	1	1
P70404	Isocitrate dehydrogenase [NAD] subunit gamma 1, mitochondrial OS=Mus musculus GN=Idh3g PE=1 SV=1	72.3972	14.8188	10	1
P70452	Syntaxin-4 OS=Mus musculus GN=Stx4 PE=1 SV=1	67.8474	6.55629	6	1
P70670	Nascent polypeptide-associated complex subunit alpha, muscle-specific form OS=Mus musculus GN=Naca PE=1 SV=2	61.549	13.1752	14	1
P70698	CTP synthase 1 OS=Mus musculus GN=Ctps1 PE=1 SV=2	94.5948	3.46924	4	1
P70699	Lysosomal alpha-glucosidase OS=Mus musculus GN=Gaa PE=1 SV=2	66.0276	12.9803	5	1
P80314	T-complex protein 1 subunit beta OS=Mus musculus GN=Cct2 PE=1 SV=4	73.0417	12.086	18	1
P80316	T-complex protein 1 subunit epsilon OS=Mus musculus GN=Cct5 PE=1 SV=1	75.5225	14.8683	21	1
P80318	T-complex protein 1 subunit gamma OS=Mus musculus GN=Cct3 PE=1 SV=1	67.4889	10.7154	15	1
[truncated: 4,470 more rows]
