# Supplementary material for: Selective clearance of the inner nuclear membrane protein emerin by vesicular transport during ER stress
Source: eLife journal article supplement (doi:10.7554/elife.49796), 2019-10-10
Supplement: supp [file elife-49796-supp-v1.zip › elife_poa_e49796_Supplementary_file_3.xlsx]

## Sheet: overview
Table S1
PROTEOME MEDIAN		K (slope)	stdev (K)	T1/2 (days)	median R2 of fit	n	all half lives calculated at peptide level and averaged to give protein-level half lives
		-0.312	0.231	2.422	0.963	1677	plotted ln(%H) vs time
Controls							As in Schuman paper
Uniprot ID	protein name	K (slope)	stdev (K)	T1/2 (days)	R2 of fit	T1/2 decile
Q9Z0W3	Nup160	-0.04	0.01	18.385	0.945	10
Q01320	Topo2a	0.832	0.262	0.902	0.942	1

## Sheet: INM proteins
UniProt ID	protein name	K (slope)	stdev (K)	T1/2 (days)	R2 of fit	T1/2 decile	extralumenal domain size (TMHMM)
O08579	emerin	-0.45972	0.0687314	1.52881	0.935646	3	223 aa (single-pass TM)
Q3U9G9	LBR	-0.190345	0.0271852	3.69348	0.957818	8	208 aa (multi-pass TM)
Q61029	LAP2b	-0.356522	0.159157	2.13658	0.963158	5	410 aa (single-pass TM)
Q6DVA0	LEMD2	-0.280518	0.08704	2.67556	0.994899	6	416 aa (multi-pass TM)
Q8BJS4	SUN2	-0.284383	0.215336	2.89618	0.961724	6	158 aa (single-pass TM)
Q8VC65	NRM	-0.0790971	--	8.76325	0.957341	10	40 aa (multi-pass TM)
Q921T2	LAP1	-0.343774	0.0817232	2.10718	0.985502	5	337 aa (single-pass TM)
Q9DBS1	TMEM43	-0.286138	0.1645	3.32503	0.914908	7	258 aa (multi-pass TM)
Q9D666	Sun1	-0.279515	0.129442	2.76379	0.979629	6	176 aa (multi-pass TM)
E9QP59	MAN1	-0.325695	0.0047295	2.12844	0.995745	5	733 aa (multi-pass TM)

## Sheet: NETs
UniProt ID	protein name	K (slope)	stdev (K)	T1/2 (days)	R2 of fit	T1/2 decile
Q3TMP8	TMEM38a	-0.485472	--	1.42778	0.967234	3
Q4FZC9	Nesprin-3	-0.345529	0.29044	4.34611	0.894036	8
Q6ZWR6	Nesprin-1	-0.392041	0.141519	1.89127	0.989415	4
Q8BM55	TMEM214	-0.670875	0.348626	1.29262	0.973737	2
Q8BMK4	CKAP4	-0.223783	0.0526513	3.28907	0.93232	7
Q8BXZ1	TMX3	-0.546648	0.150765	1.33098	0.97592	2
Q8C0L0	TMX4	-0.570183	0.260447	1.46755	0.986204	3
Q8VBZ3	Clptm1	-0.160019	--	4.33165	0.995562	8
Q8VCM8	nicalin	-0.148207	0.0882738	6.02685	0.957746	9
Q8BFZ9	erlin-2	-0.228634	0.124899	3.79192	0.960157	8
Q8BRH0	Tmtc3	-0.160931	0.00457634	4.30886	0.953545	8
Q8VCB1	Ndc1	-0.105685	--	6.55861	0.893034	10

## Sheet: ER TM proteins
UniprotID	Protein name	K (slope)	stdev (K)	T1/2 (days)	R2 of fit	T1/2 decile
A2AGL3	Ryr3	-0.451222	0.00666026	1.53632	0.99935	3
B9EJ80	Pdzd8	-0.421125	--	1.64594	0.938896	3
O08547	Sec22b	-0.299271	0.0732957	2.43388	0.958314	6
O09005	Degs1	-0.545826	--	1.2699	0.844369	2
O35074	Ptgis	-0.248945	0.0340198	2.8385	0.942787	6
O35166	Gosr2	-0.765163	0.154664	0.928661	0.900445	1
O35405	Pld3	-0.388864	0.0645513	1.80739	0.964687	4
O54734	Ddost	-0.234551	0.09684	3.74643	0.987305	8
O55143	Atp2a2	-0.591737	0.226111	1.31425	0.974459	2
O55242	Sigmar1	-0.0978248	--	7.0856	0.979822	10
O70503	Hsd17b12	-0.336079	0.169531	2.74905	0.929022	6
P11881	Itpr1	-0.666274	0.137283	1.0629	0.874208	1
P35564	Canx	-0.355317	0.148688	2.42104	0.963322	5
P37040	Por	-0.406057	0.0773536	1.78243	0.962038	4
P41216	Acsl1	-0.377089	0.0796155	1.91244	0.982292	4
P47758	Srprb	-0.642571	--	1.07871	0.971675	2
P48410	Abcd1	-0.399205	--	1.73632	0.99821	4
P50285	Fmo1	-0.245651	--	2.82168	0.992934	6
P52019	Erg1	-1.27629	--	0.543095	0.921463	1
P61620	Sec61a1	-0.220628	0.168899	4.3181	0.986037	8
P61804	Dad1	-0.366592	--	1.89079	0.998211	4
P70227	Itpr3	-0.508574	0.203891	1.62628	0.956351	3
P70245	Ebp	-0.221209	--	3.13345	0.983905	7
P70302	Stim1	-0.581829	0.0672925	1.20187	0.973625	2
P97363	Sptlc2	-0.737138	0.214681	0.981967	0.857593	1
P97464	Ext1	-0.190439	--	3.63974	0.98294	8
Q3KNM2	March5	-0.501957	--	1.38089	0.983839	2
Q3TDQ1	Stt3b	-0.391279	0.0461318	1.78906	0.968617	4
Q3TRM4	Pnpla6	-0.481677	0.0474192	1.44869	0.943957	3
Q3TZZ7	Esyt2	-0.392131	0.0840822	1.91595	0.9564	4
Q3U7R1	Esyt1	-0.318355	0.0449356	2.21791	0.967546	5
Q3UN02	Lclat1	-0.447173	--	1.55006	0.996236	3
Q3UVK0	Ermp1	-0.291756	0.214979	3.21793	0.925084	7
Q3V009	Tmed1	-0.234303	0.157432	3.82083	0.986068	8
Q61263	Soat1	-0.367864	0.333845	3.20341	0.97528	7
Q61335	Bap31	-0.418707	0.0940259	1.71586	0.946339	3
Q61595	Ktn1	-0.741789	0.402257	1.07396	0.97792	1
Q63886	Ugt1a1	-0.0804626	--	8.61453	0.971387	10
Q64435	Ugt1a6	-0.342049	0.369939	4.88141	0.897172	9
Q6PA06	Atl2	-0.380938	0.275241	2.46231	0.978682	6
Q6ZPR5	Smpd4	-0.214734	0.0592695	3.45636	0.935559	7
Q6ZQI3	Mlec	-0.169609	0.0759931	4.61933	0.965878	9
Q6ZWQ7	Spcs3	-0.225222	0.0959943	3.70145	0.982685	8
Q7TQ95	Lnpk	-0.442633	0.0450847	1.5781	0.989943	3
Q80W54	Zmpste24	-0.27602	0.0859355	2.83293	0.940061	6
Q80WJ7	Lyric	-0.618232	0.174735	1.19928	0.98743	2
Q8BI84	Tango	-0.498291	0.237526	1.6269	0.986165	3
Q8BLF1	Nceh1	-0.322281	0.13793	2.56618	0.950673	6
Q8BN21	Vrk2	-0.173948	0.0185652	4.00762	0.978808	8
Q8BU14	Sec62	-0.812711	0.484833	1.06952	0.890051	1
Q8BYU6	Tor1aip2	-0.215299	--	3.21946	0.979714	7
Q8C3X8	Lmf2	-0.228677	0.13876	4.05275	0.949806	8
Q8C7E7	Stbd1	-0.671411	--	1.03237	0.998178	1
Q8K0C4	Cyp51a1	-1.09727	0.95137	1.01213	0.94633	1
Q8K1N1	Pnpla8	-0.363264	0.0601604	1.93464	0.995154	4
Q8K273	Tmem32	-0.499977	--	1.38636	0.99409	3
Q8K2C9	Hacd3	-0.400867	--	1.72912	0.97211	4
Q8R1V4	Tmed4	-0.31045	0.0194777	2.23712	0.997307	5
Q8R429	Atp2a1	-0.425479	0.0416421	1.64415	0.992019	3
Q8R5J9	Arl6ip5	-0.538876	0.051199	1.29506	0.979746	2
Q8VBT0	Tmx1	-0.114855	--	6.035	0.981464	9
Q8VCH6	Dhcr24	-0.537551	0.0173959	1.29013	0.940132	2
Q8VDP6	Cdipt	-0.326423	0.000630545	2.12347	0.997804	5
Q8VE91	Fam134b	-0.665705	--	1.04122	0.913441	1
Q8VHE0	Sec63	-0.71796	--	0.965439	0.933394	1
Q91V01	Lpcat3	-0.184271	--	3.76156	0.945118	8
Q91VE0	Slc27a4	-0.965209	0.419587	0.793066	0.927477	1
Q91X78	Erlin1	-0.136645	--	5.0726	0.976946	9
Q91YH5	Atl3	-0.505282	0.0935875	1.40388	0.962272	3
Q920L1	Fads1	-0.621418	0.565987	1.90599	0.88488	4
Q922Q8	Lrrc59	-0.410852	0.0429024	1.70338	0.98212	3
Q924Z4	Cers2	-0.248843	--	2.78548	0.983289	6
Q99J56	Derl1	-0.782498	--	0.885813	0.948093	1
Q99PL5	Rrbp1	-0.699128	0.22849	1.08275	0.965768	2
Q9CQB5	Cisd2	-0.416713	--	1.66337	0.985201	3
Q9CQE7	Ergic3	-0.135601	--	5.11166	0.981805	9
Q9CR20	Ier3ip1	-0.145928	0.015674	4.7775	0.988833	9
Q9CR67	Tmem33	-0.632925	--	1.09515	0.988966	2
Q9CR89	Ergic2	-0.26892	0.260938	4.87025	0.921852	9
Q9CRA4	Msmo1	-0.124368	--	5.57335	0.992594	9
Q9CX13	Cnih4	-0.136373	--	5.08274	0.830635	9
Q9CY27	Tecr	-0.395627	0.134255	1.97235	0.971855	4
Q9CY50	Ssr1	-0.364386	0.231606	3.1546	0.955551	7
Q9CYN2	Spcs2	-0.242012	0.115381	3.35074	0.969074	7
Q9CZW4	Acsl3	-0.723876	0.300424	1.11665	0.900125	2
Q9D0F3	Lman1	-0.334081	0.129624	2.66534	0.99526	6
Q9D0L7	Armc10	-0.286431	0.0146197	2.4231	0.97781	6
Q9D1D4	Tmed10	-0.149743	0.0920295	5.65015	0.987012	9
Q9D1I2	Card19	-0.160721	--	4.31273	0.9872	8
Q9D379	Ephx1	-0.315325	0.11525	2.52826	0.94453	6
Q9D517	Agpat3	-0.285097	0.104894	2.79966	0.988398	6
Q9D8V0	Hm13	-0.131847	0.0203471	5.34807	0.941044	9
Q9DAV9	Tmem38b	-0.630373	--	1.09958	0.925164	2
Q9DB25	Alg5	-0.309039	--	2.24291	0.896464	5
Q9DC29	Abcb6	-0.779869	--	0.888799	0.876929	1
Q9DCF9	Ssr3	-0.619616	--	1.11867	0.970094	2
Q9EP69	Sacm1l	-0.361318	0.0185626	1.9225	0.981366	4
Q9EPE9	Atp13a1	-0.356657	0.19478	2.64836	0.968002	6
Q9EQH2	Erap1	-0.334995	0.048055	2.09746	0.991479	5
Q9EQQ2	Yipf5	-0.100928	--	6.86771	0.951199	10
Q9ER64	Osbpl5	-0.76331	--	0.908081	0.936317	1
Q9ET77	Jph3	-0.336862	--	2.05766	0.995745	5
Q9ET78	Jph2	-0.41704	0.074324	1.70307	0.981448	3
Q9JJE7	Fads3	-0.578856	--	1.19744	0.843648	2
Q9JLR1	Sec61a2	-0.248622	0.152485	3.61898	0.984868	8
Q9QUJ7	Acsl4	-0.885183	0.258926	0.846982	0.948493	1
Q9QY76	Vapb	-0.392118	0.0450055	1.78558	0.987477	4
Q9R1S3	Pign	-0.253891	0.214311	4.241	0.956643	8
Q9WV55	Vap33	-0.408478	0.0556288	1.72446	0.991948	4
Q9WV91	Ptgfrn	-0.40064	--	1.7301	0.999827	4
Q9Z2A7	Dgat1	-0.303831	--	2.28135	0.907936	5
Q9Z329	Itpr2	-0.605053	0.050703	1.14963	0.915783	2
